# Supplementary material for: Transgressive inheritance of broad-spectrum resistance to Heterodera glycines and Meloidogyne incognita in soybean chromosome segment substitution lines
Source: Research Square preprint supplement (doi:10.21203/rs.3.rs-7587031/v1), 2025-10-09
Supplement: Supplementary file 1 [file 11c7a75e9b2c494dac3c1bbe.xlsx]

## Sheet: Supplemental Table S1
Supplemental Table S1 The evaluation of CSSLs to Heterodera glycines infection including root fresh weight， cysts per gram root and Female Index in 2021 and Meloidogyne incongnita infection including galling index (GI), reproduction (RF), egg massed per gram root (EMR) and eggs per gram root (EGR) in 2022.
Heterodera glycines - Test1											Meloidogyne incongnita - Test1 (Inoculation of 5000 eggs each plant)										Meloidogyne incongnita - Test2 (Inoculation of 10000 eggs each plant)
CSSLs	Root fresh weight (g)	Std. Error	Cysts/plant	Std. Error	Cysts/gram root (CGR)	Std. Error	Female Index (FI)	Std. Error			CSSLs	Root fresh weight (RW)	Std. Error	Galling index	Std. Error	Reproduction factor	Std. Error	egg masses/gram root	Std. Error	eggs/gram root	Std. Error		CSSLs	Root fresh weight (RW)	Std. Error	Galling index	Std. Error	Reproduction factor	Std. Error	egg masses/gram root	Std. Error	eggs/gram root	Std. Error
1	1.93	0.541926	123.25	25.2335	79.3135	20.2482	101.69	20.8197			5	2.674	0.115827	2.6	0.4	0.054	0.0102956	2.016	1.10591	95.614	16.496		5	1.3775	0.174851	3.75	0.25	0.315	0.0872258	10.0775	2.81537	2199.02	446.034
2	1.93167	0.150342	112.5	19.9311	57.4058	8.78454	92.8233	16.4453			6	2.5325	0.682488	3.75	0.478714	0.1425	0.0698063	4.375	2.02285	349.68	193.388		6	1.77333	0.608176	3.66667	0.333333	0.403333	0.124141	5.31333	1.31482	2339.49	131.766
3	2.1075	0.154022	94.75	15.2117	47.2283	10.5564	78.175	12.5505			7	2.408	0.337482	3.2	0.2	0.25	0.065192	3.832	1.37301	632.562	209.356		7	1.316	0.142674	3.8	0.2	0.344	0.0538145	17.818	3.81019	2693	382.124
4	2.32667	0.295609	79.8333	11.5482	35.8528	4.90915	65.8683	9.52889			8	2.858	0.219463	3	0	0.184	0.0512445	3.65	0.787248	316.936	94.1754		8	1.574	0.293285	4	0	1.052	0.304818	36.44	6.04687	6659.23	1043.46
5	1.9475	0.263704	144.25	20.7821	76.9175	12.5111	119.017	17.1468			9	2.014	0.361616	3	0.316228	0.116	0.0699714	1.86	0.558677	251.194	107.546		9	1.584	0.217131	4.2	0.2	0.892	0.307301	33.312	8.8187	5514.95	1759.84
6	2.185	0.20308	122	23.4556	61.159	19.23	100.66	19.3528			10	2.188	0.361226	3.4	0.244949	0.1	0.0197484	1.958	0.628239	254.62	70.4686		10	1.558	0.211811	3.8	0.374166	0.642	0.214042	29.646	9.08108	4558.16	1560.17
7	2.19167	0.278393	140.667	19.2504	74.1202	19.7688	116.06	15.8829			11	2.3775	0.420265	3	0	0.13	0.0679461	3.8075	1.3506	348.43	215.166		11	0.965	0.191681	3	0.408248	0.365	0.154083	26.345	13.3017	4226.81	2028.63
8	2.16667	0.231224	141	22.3323	71.6872	16.9656	116.34	18.4264			12	1.86	0.219127	3.25	0.25	0.1875	0.0874047	6.9625	2.46118	495.902	243.856		12	1.656	0.209538	4	0.447214	1.378	0.702712	27.012	9.16614	7756.29	3583.04
9	2.28833	0.175887	112	14.7287	52.0355	9.66205	92.41	12.1526			13	2.49	0.290259	3.4	0.244949	0.17	0.0474342	5.36	2.17943	350.118	114.461		13	1.662	0.248423	4.4	0.244949	0.896	0.159141	26.954	7.38074	6313.34	2212.96
10	2.122	0.147662	145.8	8.12034	71.169	9.50454	120.298	6.69983			15	2.032	0.172841	3.4	0.244949	0.214	0.0820122	5.854	1.91178	499.88	156.944		15	1.442	0.24701	3.4	0.244949	0.51	0.0888257	23.628	7.27119	3627.19	399.066
11	2.315	0.195	103.5	17.5	44.3865	3.8205	85.395	14.435			16	2.782	0.313104	3	0	0.086	0.0309192	1.078	0.494878	170.93	56.6013		16	2.1	0.179768	3.75	0.25	0.4675	0.064727	9.7125	2.51248	2256.05	326.615
12	2.22333	0.308022	112	22.0303	50.74	7.02445	92.41	18.175			17	2.632	0.234806	3.4	0.244949	0.144	0.0235797	2.598	0.544494	288.76	62.8577		17	1.755	0.208427	4	0	0.74	0.349929	20.675	6.80125	4147.89	1671.73
14	2.302	0.194612	158.6	19.3613	57.7926	9.51203	106.106	13.4577			18	2.78	0.285692	3	0.316228	0.318	0.126428	3.66	1.04633	593.622	266.323		18	2.4225	0.589369	3.5	0.288675	0.545	0.208746	12.3575	1.53487	2137.16	470.162
15	1.985	0.159713	128.6	16.3113	49.3828	14.8077	75.495	16.9988			19	3.256	0.382892	3.6	0.509902	0.136	0.0107703	1.284	0.590843	219.182	32.2022		19	1.09333	0.126007	4.33333	0.333333	1.35	0.619785	67.34	15.3929	12509.9	5973.12
16	2.06833	0.207484	91.5	20.6014	56.6903	7.40428	91.0333	4.46796			20	2.676	0.335747	3.6	0.244949	0.29	0.0985393	6.022	4.10476	662.412	288.934		20	1.82	0.142092	4.2	0.374166	1.54	0.270481	37.216	8.33165	8903.87	1889.35
17	2.5	0.197687	110.333	5.41397	57.2776	7.85272	115.678	13.7464			21	3.616	0.443166	4	0.316228	0.468	0.0913455	4.092	0.971485	665.644	148.634		21	2.84	0.457974	5.2	0.2	3.716	1.4286	59.006	13.2106	12618.2	3485.22
18	2.1625	0.386035	140.2	16.6595	57.4828	9.7029	98.805	21.9499			22	2.726	0.34416	3.6	0.244949	0.15	0.0539444	1.472	0.267645	243.994	66.0339		22	1.73	0.434753	4	0	0.644	0.188563	27.01	9.05623	3867.36	723.675
19	2.51	0.107176	119.75	26.6032	47.4853	9.18315	96.9483	18.0921			23	2.696	0.278812	3.4	0.244949	0.19	0.034641	3.304	1.94411	363.202	81.0373		23	1.63667	0.399347	4	0	0.883333	0.178916	26.43	9.01244	5540.18	499.679
20	2.555	0.299235	117.5	21.9268	55.2558	6.02589	115.925	15.6628			24	2.444	0.0921195	3.6	0.244949	0.202	0.0778717	2.806	1.04073	435.86	174.252		24	1.884	0.342324	4.4	0.244949	0.72	0.106724	17.946	3.34272	3987.07	485.49
21	2.37	0.444803	140.5	18.9846	84.9084	25.3408	130.362	21.9407			25	1.974	0.337144	3	0.316228	0.118	0.0545344	2.746	1.59863	271.076	128.547		25	1.946	0.361934	4.2	0.374166	0.93	0.300183	24.424	9.91708	5986.79	3019.8
22	2.222	0.167314	158	26.5932	60.6318	3.38875	110.396	7.71153			27	1.924	0.524353	2.6	0.4	0.038	0.0168523	1.362	0.865155	127.964	74.4026		27	0.97	0.143585	3.25	0.25	0.28	0.0908295	19.72	8.71177	3479.5	1647.89
23	2.555	0.134443	133.8	9.34559	57.302	11.3042	117.367	20.1524			28	2.27	0.256418	3.2	0.2	0.164	0.078905	3.334	1.7106	373.392	178.744		28	1.6425	0.292358	3.75	0.25	0.93	0.170734	30.94	8.46955	6781.33	2423
24	2.235	0.215496	142.25	24.4246	35.5317	7.08792	63.1167	12.637			29	2.334	0.2825	3.2	0.2	0.116	0.0761971	2.248	1.42831	364.16	288.688		29	1.59	0.358422	4	0	0.395	0.0801561	16.8225	5.45744	2867.56	727.585
25	2.864	0.197803	76.5	15.3161	35.4132	5.06844	81.52	8.00535			31	2.538	0.520821	3.2	0.2	0.042	0.0205913	0.678	0.408441	83.932	37.7677		31	1.964	0.26417	3.6	0.244949	0.434	0.130023	11.526	3.18681	2429.92	741.026
26	2.085	0.247531	98.8	9.70258	73.7235	11.7648	117.712	10.3779			32	2.268	0.266653	3	0.316228	0.052	0.02498	1.304	0.561477	137.012	70.5553		32	1.935	0.225259	4	0	0.7925	0.335221	17.21	9.05047	3945.68	1553.84
27	2.19667	0.114358	142.667	12.5795	66.4845	8.41376	117.988	13.153			33	2.438	0.422213	3.2	0.2	0.02	0.02	0.138	0.138	32.99	32.99		33	1.5575	0.413045	3.25	0.25	0.4275	0.173223	17.855	4.67322	2742.54	591.415
28	1.99	0.239736	143	15.9416	71.8563	9.91927	108.36	3.97905			34	2.626	0.513348	3.4	0.244949	0.054	0.0208806	0.702	0.277874	89.31	34.7867		34	1.38	0.123018	4.25	0.25	0.8275	0.0749861	42.02	11.1735	6000.02	243.758
29	2.006	0.274674	131.333	4.82125	74.366	12.8836	111.88	6.82706			35	2.876	0.228158	3	0.316228	0.09	0.0277489	1.028	0.355125	166.374	58.2701		35	1.954	0.29802	3.8	0.374166	0.514	0.176709	16.272	6.46211	2444.36	512.422
30	1.798	0.103701	135.6	8.27406	74.2972	11.9833	106.93	13.2799			36	3.19	0.224655	3.2	0.374166	0.158	0.0551725	4.868	2.68606	253.644	83.413		36	1.242	0.15223	4	0.316228	0.734	0.12687	21.854	5.07142	6394.67	1550.65
32	1.932	0.169541	129.6	16.0953	72.757	7.15579	112.706	8.07511			37	2.836	0.246386	3.8	0.2	0.17	0.061563	2.068	0.933335	319.432	114.102		37	1.832	0.358698	3.8	0.2	1.05	0.366374	27.624	9.03491	6185.6	1736.51
33	1.62	0.193261	136.6	9.7857	76.0382	22.3993	97.36	26.3264			38	2.434	0.273744	3.6	0.244949	0.144	0.0557315	2.958	0.972165	298.15	107.964		38	1.416	0.200415	4.2	0.2	0.794	0.0869253	27.212	1.0731	6101.14	1059.43
34	2.19167	0.281228	118	31.9077	61.8118	10.5573	104.235	13.968			40	2.468	0.327084	3.6	0.244949	0.076	0.0193907	1.936	0.514768	153.712	29.4133		40	1.2475	0.086446	3.5	0.288675	0.515	0.163733	23.1675	5.93399	4115.51	1360.36
35	1.84	0.128763	126.333	16.9286	73.7116	4.57446	110.234	4.3632			41	2.9375	0.415198	3.75	0.25	0.0975	0.042106	2.0325	1.17755	179.12	89.1801		41	2	0.192484	3.75	0.25	0.785	0.0983616	26.7125	9.66395	4066.59	763.377
36	2.085	0.1768	133.6	5.28772	69.607	9.45358	116.613	15.741			44	2.516	0.341022	3.2	0.2	0.124	0.0382884	4.056	1.39458	252.558	88.8308		44	1.252	0.295794	3.4	0.244949	0.654	0.420554	12.786	3.50899	3962.89	1561.27
37	1.99667	0.0754836	141.333	19.0782	69.4855	4.87226	115.098	10.2525			45	2.478	0.444335	2.6	0.244949	0.162	0.0964572	1.328	0.54363	330.416	149.673		45	1.8275	0.156545	4	0	0.52	0.118954	8.885	2.87654	2775.1	596.003
38	1.72833	0.35335	139.5	12.4251	78.1917	19.7638	91.585	13.8538			46	3.55	0.559178	3	0	0.04	0.0219089	0.414	0.258372	45.434	25.3636		46	2.0925	0.238236	3.5	0.288675	0.4025	0.127565	7.305	2.71974	1911.75	570.636
39	1.945	0.182094	111	16.7909	68.3237	18.1176	102.308	23.8621			47	3.0225	0.259563	3.75	0.25	0.36	0.0385141	2.6225	0.791185	622.15	104.77		47	1.612	0.201975	3.8	0.2	0.73	0.120416	17.83	3.58653	4784.78	904.6
40	2.46833	0.273269	124	28.9223	60.1172	13.383	108.912	16.6376			48	3.442	0.325091	3.4	0.244949	0.292	0.0720694	1.946	0.656731	468.59	138.693		48	2.392	0.212518	4.2	0.374166	1.018	0.170247	19.806	1.85942	4172.78	430.406
41	1.712	0.0971802	132	20.1643	91.8002	22.5991	127.062	31.265			49	2.652	0.157525	3.6	0.244949	0.168	0.0617576	1.228	0.359603	295.54	101.025		49	1.138	0.207663	4	0	0.646	0.0879545	29.042	6.1826	5885.09	518.159
42	2.55	0.237065	154	37.892	51.0217	10.1868	99.2867	13.127			50	1.988	0.316819	2.8	0.374166	0.086	0.0334066	1.014	0.269362	202.838	74.8813		50	1.478	0.135772	3.8	0.2	0.41	0.0768115	16.442	2.36481	3085.39	976.732
43	1.94667	0.118143	120.333	15.9095	79.0725	11.0602	122.248	11.0135			51	2.13	0.222598	3.2	0.374166	0.044	0.012083	2.094	0.827349	104.74	26.7869		51	1.708	0.23256	3.6	0.244949	0.29	0.0766159	18.238	6.67306	2144.88	974.491
44	1.674	0.297062	148.167	13.3477	68.2006	14.1527	84.488	15.1194			52	2.654	0.473176	3.2	0.374166	0.046	0.0276767	0.838	0.525513	124.048	78.2155		52	1.604	0.210014	3.6	0.4	0.756	0.153968	24.244	5.23801	4860.68	1015.2
45	2.042	0.229421	102.4	18.3265	77.5288	22.136	121.124	23.3499			53	2.334	0.484279	2.8	0.2	0.104	0.0672012	2.814	1.05146	256.346	135.34		53	1.678	0.356236	3.8	0.374166	1.09	0.232487	22.074	4.99822	8827.04	4056.61
46	1.934	0.130062	146.8	28.3009	56.6154	9.46338	92.904	18.6665			54	3.25667	0.544681	2.33333	0.333333	0.0266667	0.0133333	1.36333	0.708574	46.9333	24.0313		54	1.88	0.330933	4	0.408248	0.355	0.0347611	8.36	3.28469	2028.57	361.662
47	2.234	0.231724	112.6	22.6243	56.3006	3.55517	103.96	14.2132			56	3.006	0.186885	3.2	0.2	0.116	0.0462169	2.066	1.14867	202.11	88.9526		56	1.78	0.242136	4.25	0.25	0.63	0.186172	31.602	4.23716	3440.47	761.854
48	1.9	0.179481	126	17.225	78.728	13.8096	120.323	16.9953			57	2.884	0.180986	2.6	0.244949	0.062	0.0261534	0.566	0.294883	106.446	45.917		57	1.28	0.26397	3.6	0.244949	0.494	0.235576	20.274	4.23723	3800.43	1353.32
49	1.958	0.256815	145.833	20.5984	59.5182	10.0359	88.78	5.70894			58	2.84	0.561525	3.2	0.2	0.066	0.0220454	1.542	1.14978	143.586	73.3673		58	1.92	0.438007	3.25	0.25	0.665	0.305082	12.1825	5.2648	3597.75	1624.42
50	2.1	0.320983	107.6	6.91809	38.1766	6.52921	63.696	11.8982			59	3.194	0.275002	3.2	0.2	0.088	0.0543507	1.148	0.785222	155.332	103.42		59	1.892	0.341283	3.8	0.2	0.62	0.240333	13.452	2.77498	2974.8	1102.41
51	1.88	0.309419	77.2	14.4201	64.1632	10.8934	89.935	13.8003			60	1.984	0.245736	3	0.316228	0.132	0.0454313	2.338	0.765646	299.466	78.0059		60	1.838	0.150911	3.6	0.244949	0.758	0.171738	20.046	3.86784	3919.28	738.717
52	2.0075	0.112722	109	16.7252	55.5445	0.899728	92.2025	6.45665			61	2.464	0.268432	3.4	0.4	0.136	0.102985	1.348	0.681692	252.432	166.101		61	2.542	0.359422	3.8	0.2	0.98	0.348583	17.52	4.14721	4297.56	2019.69
53	2.835	0.194092	111.75	7.82491	38.6375	6.01565	88.4233	13.4157			62	2.522	0.310313	3.2	0.2	0.052	0.0159374	0.63	0.209976	96.768	29.97		62	1.638	0.171447	4.2	0.2	0.922	0.129553	29.146	3.61279	5642.42	594.532
54	2.542	0.157398	107.167	16.2612	35.33	6.46175	71.948	11.3839			63	2.668	0.174511	3.4	0.244949	0.092	0.0387814	1.55	0.522752	179.194	73.7099		63	2	0.461303	4.33333	0.333333	0.69	0.355575	15.35	5.00704	3578.8	1521.39
56	1.95	0.1709	87.2	13.7964	52.602	3.4573	83.8833	7.14766			64	2.554	0.355142	3	0.316228	0.15	0.061563	2.744	0.836413	264.158	89.9448		64	2.304	0.239783	3.8	0.2	1.012	0.284823	13.162	4.32657	4566.56	1251.92
57	2.45	0.260896	101.667	8.66282	34.6195	10.3248	64.975	12.8774			66	2.834	0.0970361	3.2	0.374166	0.17	0.0419524	1.284	0.285668	296.308	69.6586		66	2.67	0.516227	4.4	0.244949	0.888	0.273448	17.228	1.95482	3049.64	446.584
58	2.02667	0.293163	78.75	15.6065	59.483	4.78343	96.81	12.4222			67	2.63	0.107703	2.8	0.2	0.094	0.0393192	1.926	0.795265	177.058	73.9164		67	2.07	0.282931	4.25	0.25	1.0525	0.419511	17.835	4.56798	4799.1	1663.91
59	2.34333	0.0704115	117.333	15.0547	46.4525	6.98645	89.245	12.5896			68	2.5675	0.193923	2.75	0.25	0.0325	0.0125	1.42	0.535023	66.0925	27.1035		68	2.24	0.299054	3.33333	0.666667	0.833333	0.00881917	16.1567	4.10013	3836.4	484.345
60	1.99	0.217608	108.167	15.2587	76.3643	11.5533	121.425	16.4718			69	2.5425	0.303298	2.75	0.25	0.2275	0.120787	3.445	1.49311	537.773	308.714		69	2.156	0.309929	4.2	0.2	0.986	0.206606	18.91	3.74522	5023.02	1445.95
61	2.12167	0.20364	147.167	19.964	73.278	19.6411	113.86	18.2122			70	2.304	0.176652	3.2	0.2	0.1	0.0214476	2.074	0.748476	213.962	33.5082		70	1.445	0.479731	4.25	0.25	0.635	0.262345	46.7225	14.1837	6319.69	3012.34
62	2.24	0.164965	138	22.0741	56.2437	15.6268	97.2217	20.5546			71	3.362	0.337822	2.8	0.2	0.084	0.0231517	1.128	0.559887	125.768	30.4708		71	1.37	0.320344	3.6	0.244949	0.48	0.143283	22.536	8.94868	3791.07	949.724
63	2.185	0.262383	117.833	24.9124	82.9838	15.9676	134.763	17.3386			73	2.362	0.257729	3	0	0.172	0.04994	2.734	0.626152	344.582	90.9646		73	1.712	0.181422	4	0	0.5	0.113974	19.526	5.04385	3195.57	1016.83
64	2.275	0.232863	163.333	21.0138	70.4673	17.7935	117.025	14.0716			74	2.156	0.145794	3	0.316228	0.08	0.0361939	0.45	0.240645	171.404	71.5788		74	1.152	0.325444	3.8	0.2	0.518	0.184347	12.34	3.45788	4708.03	1176.95
65	2.24333	0.203235	141.833	17.0556	54.6907	6.5256	97.9117	10.4008			75	1.916	0.205441	2.8	0.2	0.094	0.0224944	3.804	0.910086	236.134	41.5008		75	1.78	0.215136	3.75	0.25	0.555	0.272596	15.7425	7.00606	2847.28	1356.11
66	1.8925	0.26834	118.667	12.606	114.642	29.4676	160.892	18.5272			76	2.268	0.268801	3	0	0.036	0.0102956	0.662	0.202396	87.464	26.4641		76	1.39	0.362698	4.25	0.25	0.7675	0.181263	39.8475	5.57303	6071.86	1071.29
67	2.299	0.28027	195	22.4537	59.7918	12.6395	103.134	6.95169			77	2.438	0.20031	2.4	0.244949	0.106	0.0290861	1.352	0.865785	223.478	74.8793		77	1.92	0.289482	4.2	0.2	0.8	0.298915	22.412	7.20323	4123.32	1538.65
68	2.13167	0.112854	125	8.42615	77.9897	14.847	131.602	19.8495			78	2.336	0.146	2.6	0.244949	0.06	0.0228035	2.234	0.806856	125.942	45.5185		78	1.724	0.169988	4.2	0.2	1.18	0.404932	23.98	9.08458	6655.7	1806.3
69	1.78667	0.10072	159.5	24.0565	76.4957	17.7682	108.36	21.3264			80	2.136	0.282694	2.8	0.2	0.07	0.0388587	2.104	0.88799	179.086	110.846		80	1.74333	0.338936	4.33333	0.333333	1.13	0.0986577	34.8267	14.4441	7353.06	2300.33
70	2.47	0.158008	131.333	25.8478	60.2582	7.72957	120.737	13.9892			81	2.112	0.257263	2.8	0.374166	0.104	0.011225	1.908	0.85698	252.374	30.1019		81	1.702	0.291812	3.2	0.374166	0.884	0.423681	16.236	5.79913	4493.64	1367.57
71	1.95833	0.210165	146.333	16.9542	78.4485	21.254	114.137	21.6576			82	2.26	0.0471169	2.8	0.2	0.134	0.0561783	3.41	0.794789	296.198	119.85		82	1.728	0.310313	4.6	0.244949	1.026	0.434023	27.81	3.62718	5340.8	2061.2
73	1.896	0.333416	138.333	26.2484	74.0312	9.08218	106.27	6.10544			83	1.834	0.272995	2.8	0.2	0.168	0.0815721	2.188	1.27729	497.734	203.975		83	1.835	0.270632	4.25	0.478714	0.535	0.0499166	9.195	3.21821	3240.6	798.378
74	1.83	0.238474	128.8	7.39865	62.746	5.75991	94.886	16.6143			84	2.728	0.283327	2.8	0.2	0.03	0.013784	0.626	0.287152	57.298	27.1936		84	1.3425	0.0996975	3.75	0.478714	0.4825	0.0919579	28.465	5.5391	3730.86	908.554
75	2.358	0.0692387	115	20.137	50.2584	2.81855	98.186	7.48939			88	2.92	0.252488	3.6	0.244949	0.148	0.0450999	1.662	0.458644	277.1	90.2785		88	1.854	0.316047	4.6	0.244949	0.87	0.231019	16.456	2.77175	4822.23	1199.18
76	2.39333	0.134379	119	9.07744	49.9242	5.44075	98.595	11.805			89	2.664	0.186671	2.8	0.2	0.142	0.0703136	1.294	0.570286	268.306	126.946		89	1.235	0.118498	3.75	0.25	0.4675	0.170165	13.7675	0.516678	3520.22	1034.37
77	1.86	0.146105	119.5	14.3079	67.3707	8.74709	101.758	14.2682			91	2.67	0.485884	3	0	0.0625	0.0347311	0.815	0.359641	144.05	72.4587		91	1.75	0.314944	4.2	0.2	1.09	0.151129	31.964	14.2906	6529.03	682.873
78	2.79	0.156738	123.333	17.2929	38.946	8.75592	89.6583	20.5144			92	2.44	0.168315	3	0.316228	0.106	0.0331059	0.822	0.215485	207.514	59.2689		92	2.0125	0.137197	4.75	0.25	1.1075	0.182683	38.725	5.85033	5403.57	620.376
80	2.40667	0.283239	108.667	24.8632	45.3292	3.91032	90.895	15.9217			93	3.14	0.534939	2	0.316228	0.02	0.0126491	0.282	0.177888	50.26	33.5175		93	3.256	0.45126	4.6	0.244949	5.2	1.75271	87.932	28.2206	16694.2	6415.46
81	1.744	0.258565	110.167	19.2967	74.6116	9.42674	104.122	14.6699			94	3.118	0.230508	2.8	0.2	0.132	0.0507346	0.674	0.274674	201.022	80.1317		94	1.842	0.418407	3.6	0.6	0.4	0.0730068	17.772	4.98836	2471.65	661.793
82	2.59	0.229783	126.2	17.7803	47.2933	9.70845	91.9967	14.3267			95	3.0875	0.261099	2.5	0.288675	0.105	0.0210159	1.225	0.451378	168.68	20.7606		95	1.686	0.268134	3.8	0.2	0.504	0.121351	16.992	4.85573	2900.2	654.019
83	1.442	0.132567	111.5	17.3642	68.2098	6.37024	80.034	8.25885			97	3.05333	0.127192	3	0	0.0733333	0.0145297	0.883333	0.312054	121.663	20.419		97	1.575	0.347191	3.5	0.5	0.6525	0.30636	16.71	3.81629	3885.1	1132.47
84	2.345	0.312983	97	10.01	49.9573	8.5275	87.5967	7.00821			98	2.4	0.233302	2.6	0.244949	0.11	0.0288097	1.51	0.504311	241.794	79.4642		98	1.9325	0.292955	3.5	0.5	0.5825	0.120095	13.8875	4.04436	3224.29	876.96
85	2.47	0.178941	106.167	8.49477	33.565	5.63682	66.695	9.64186			100	2.466	0.106047	3.2	0.2	0.172	0.0526688	3.058	0.771449	343.318	97.718		100	1.5	0.412953	4.4	0.244949	0.666	0.229687	25.768	5.16444	4390.5	1112.12
86	1.896	0.0769805	80.8333	11.6859	52.598	13.8896	81.682	20.9736			101	2.906	0.134261	3.4	0.244949	0.172	0.0677791	1.676	0.246467	294.758	115.276		101	1.5275	0.142031	3.25	0.478714	0.46	0.0940744	12.8825	4.93255	3105.14	679.281
88	2.024	0.176369	99	25.4185	64.256	2.60294	107.426	11.1114			102	2.4	0.212297	3.2	0.2	0.23	0.0963328	2.99	1.12597	530.58	268.078		102	1.874	0.364014	3.4	0.244949	0.542	0.0912907	17.708	4.09321	3651.31	1118.24
89	2.01	0.197096	130.2	13.4663	62.0727	7.00099	98.5967	8.95465			103	2.726	0.376505	3.2	0.2	0.194	0.0580172	2.138	0.958344	330.332	65.2803		103	1.412	0.158695	3.2	0.2	0.524	0.148074	11.638	2.19299	3571.09	855.821
91	2.49	0.308253	119.5	10.8528	40.8662	7.53712	77.064	7.76431			104	2.856	0.194386	3.2	0.2	0.104	0.0410609	1.172	0.525256	178.234	63.0539		104	1.316	0.159643	3.8	0.374166	0.414	0.0955301	21.916	7.64769	3625.97	1303.92
92	2.286	0.133963	93.4	9.41063	37.2822	9.62486	66.664	14.4648			105	2.87	0.439792	3.5	0.288675	0.2275	0.0886355	3.23	1.5518	503.315	269.46		105	1.2	0.217754	3	0	0.6325	0.11905	21.295	6.57953	5652.1	990.01
93	2.39667	0.26525	80.8	17.5311	49.7235	9.5021	89.66	10.9697			106	2.492	0.284366	3.2	0.374166	0.068	0.0198494	0.966	0.370157	143.458	43.9042		106	1.55	0.23533	3.4	0.4	0.428	0.130514	12.65	6.87558	2718.89	828.362
94	2.215	0.297554	108.667	13.2958	60.1703	6.75168	102.998	10.4197			107	3.778	0.332497	3.2	0.374166	0.164	0.0287402	0.878	0.284243	240.934	67.3589		107	1.824	0.0890281	3.2	0.374166	0.762	0.166535	14.902	2.80023	4231.63	1000.24
95	2.57333	0.288047	124.833	12.6291	49.6642	8.2604	96.1233	7.61792			108	3.25	0.558883	3	0	0	0	0	0	0	0		108	1.87	0.3749	3	0.408248	0.765	0.264213	18.195	4.79941	4538	1453.87
97	2.34	0.214274	116.5	9.23309	57.3892	7.82058	109.737	17.1781			109	2.936	0.292414	2.8	0.2	0	0	0	0	0	0		109	1.224	0.250691	3.4	0.244949	0.662	0.310989	26.086	14.6225	5178.56	2280.73
98	2.06833	0.0766123	133	20.8199	52.5972	9.10667	91.035	17.2462			110	2.35	0.132728	2.25	0.25	0	0	0	0	0	0		110	1.2975	0.0904042	2.5	0.288675	0.415	0.158771	27.2625	14.369	3053.94	1054.87
101	1.988	0.0788289	110.333	20.9024	46.355	5.713	76.568	10.3556			111	2.538	0.18189	2.6	0.244949	0.174	0.0265707	2.24	0.912639	356.128	71.5759		111	1.442	0.242062	2.8	0.374166	0.256	0.0673498	7.568	2.11881	2175.65	752.895
102	1.368	0.128273	92.8	12.5515	82.9586	17.0985	89.44	12.7318			112	2.74	0.18913	2.6	0.244949	0.156	0.0731163	1.08	0.45988	313.758	172.657		112	1.43	0.15248	2.5	0.288675	0.315	0.109735	8.1275	1.88953	2041.59	569.387
103	2.14333	0.139754	108.4	15.4324	49.1395	2.33141	86.3583	5.28212			113	2.8125	0.298925	3.25	0.25	0.0625	0.0314576	1.3175	0.636296	98.6575	43.7443		113	2.334	0.28444	3.4	0.244949	1.068	0.353106	24.004	9.21405	4834.11	1435.03
104	2.445	0.175931	104.667	6.40139	45.7217	5.85474	89.52	8.69206			114	2.256	0.262042	3.2	0.2	0.27	0.0494975	4.492	1.28886	588.16	91.8348		114	1.752	0.19278	3.4	0.244949	0.548	0.208288	10.432	5.1792	3102.06	1252.53
105	1.48	0.2001	108.5	10.5349	92.9706	13.6241	111.056	18.4061			115	1.902	0.237264	3.2	0.2	0	0	0	0	0	0		115	1.632	0.146813	2.6	0.4	0.772	0.169068	27.518	14.0685	5177	1701.39
106	1.47667	0.189362	134.6	22.3083	84.7715	30.1129	85.3967	19.7358			116	1.91	0.215081	3	0	0.078	0.0391663	1.458	0.928582	191.57	85.0527		116	2.06	0.238013	3	0	0.54	0.163799	9.014	2.69973	3087.43	1171.8
108	2.85	0.351022	103.5	23.9204	48.9765	15.0771	105.197	20.1119			117	1.965	0.252669	3.25	0.25	0.025	0.0144338	0.2975	0.178062	75.1975	44.9132		117	0.986	0.141513	3.4	0.244949	0.208	0.0689493	8.258	2.16511	2048.45	515.547
109	1.94	0.0872544	127.5	24.3738	60.872	7.56576	97.6333	13.2692			118	2.175	0.232755	3.5	0.288675	0.1575	0.0306526	2.55	0.601138	359.33	63.1554		118	0.995	0.223961	3.75	0.478714	0.3875	0.0980965	21.6925	7.5412	4153.45	745.186
110	2.20833	0.173598	118.333	16.0824	64.0145	7.69753	115.098	14.9285			119	2.6725	0.184994	3	0	0.3325	0.102662	2.6975	0.331848	595.485	160.896		119	1.264	0.191431	2.8	0.489898	0.262	0.123183	14.222	3.56017	1778.08	682.002
111	2.58	0.18097	139.5	18.0937	49.9053	5.06247	106.435	14.2234			120	1.8	0.10663	3.2	0.2	0.194	0.0593801	3.41	0.591422	544.646	161.071		120	1.1025	0.183729	4	0.408248	0.3925	0.0268871	28.085	10.5994	4005.68	1020.01
112	2.465	0.281564	129	17.2385	76.2678	21.7854	133.115	23.6635			121	2.09	0.454015	3.4	0.244949	0.17	0.0378153	2.658	0.723888	428.382	70.057		121	1.348	0.0756571	3.8	0.374166	0.484	0.0826196	16.946	3.87545	3583.03	498.062
113	2.92	0.3995	161.333	28.6806	37.626	10.6206	85.8067	15.9204			123	1.802	0.292616	3.4	0.244949	0.122	0.0251794	2.074	0.439108	321.642	31.5345		123	0.9625	0.151128	3.5	0.288675	0.2425	0.138887	8.4775	1.51426	2288.66	988.156
114	2.335	0.131726	104	19.2959	62.1133	18.5868	109.873	23.0981			124	2.536	0.464377	2.8	0.2	0.052	0.0406694	0.524	0.356337	116.482	75.4845		124	1.944	0.232908	2.4	0.244949	0.6	0.313799	10.134	4.71394	3291.65	1824.09
115	2.284	0.154097	133.167	27.9945	42.6038	7.09809	81.846	16.8192			127	2.555	0.297783	3	0	0.25	0.0967815	3.6075	1.47854	536.422	225.04		127	0.923333	0.17901	3	0	0.203333	0.138604	10.4233	1.0406	2047.03	1114.87
116	1.89833	0.22458	99.2	20.3848	57.5855	11.7454	86.7717	17.8727			129	1.614	0.270935	3	0.316228	0.19	0.0686294	5.216	1.54604	553.544	165.424		129	1.49	0.129035	2.75	0.25	0.4125	0.0455293	11.0725	4.99046	2765.42	169.639
117	1.72	0.185167	105.167	21.6617	66.5047	13.5706	86.4967	12.4608			130	1.956	0.216716	3.4	0.244949	0.28	0.0946044	9.102	3.62454	817.064	280.514		130	1.336	0.198409	3	0	0.38	0.133041	5.172	2.57475	2701.64	914.366
118	1.6	0.318591	104.833	15.1028	89.8865	39.1315	88.2825	23.1055			131	2.284	0.285755	2.4	0.244949	0	0	0	0	0	0		131	1.83	0.295635	2.8	0.2	0.694	0.318223	12.156	6.95667	3742.98	1798.85
119	2.534	0.190568	107	28.003	57.7554	7.24221	119.636	15.9421			132	2.682	0.361903	3.2	0.2	0.258	0.107303	5.106	2.40971	555.914	256.821		132	1.8	0.497427	4	0	0.746667	0.072188	19.5867	1.91757	4859.89	1328
120	2.46833	0.113971	145	19.321	47.543	5.51242	97.2217	12.2524			133	1.818	0.227143	3.2	0.374166	0.076	0.0143527	2.122	0.635464	232.842	62.5534		133	1.4	0.287854	3.8	0.374166	0.5	0.141174	15.678	4.2184	3708.7	671.535
121	2.18	0.225832	117.833	14.8491	82.6683	15.2119	138.34	20.0354			135	2.388	0.0908515	3.4	0.244949	0.208	0.0370675	3.678	0.634471	444.86	89.5258		135	1.46	0.237844	3.6	0.244949	0.434	0.144624	9.706	2.00971	3811.66	1844.19
122	2.56	0.287286	167.667	24.284	59.355	7.79547	116.612	6.52925			136	1.892	0.22209	3.6	0.244949	0.184	0.0413038	3.94	1.25348	515.102	122.634		136	1.15	0.205386	4.25	0.25	0.305	0.119338	19.79	6.39995	2996.77	1319.68
123	2.485	0.188622	141.333	7.91482	58.4868	12.8427	113.45	23.6856			137	2.638	0.320084	3.6	0.244949	0.226	0.0587878	3.034	0.506188	430.26	102.845		137	1.268	0.333967	4	0.316228	0.524	0.0467547	17.328	5.60249	5193.17	1102.71
125	2.11	0.252547	137.5	28.7063	40.9752	2.58674	71.288	8.81657			139	1.762	0.457224	3.4	0.244949	0.104	0.0733894	2.06	1.62685	439.268	356.136		139	1.856	0.354014	3.8	0.2	0.538	0.129553	10.462	1.54719	3264.79	1159.69
126	2.72	0.278897	86.4	10.6846	55.611	17.7378	113.655	21.1568			142	2.478	0.477843	2.8	0.2	0.01	0.01	0.072	0.072	16.366	16.366		142	1.328	0.405751	3	0.316228	0.596	0.182499	13.726	4.09043	5146.84	1440.61
127	1.958	0.174711	137.75	25.643	62.9398	19.3831	95.214	21.8445			143	2.232	0.465074	3.6	0.244949	0.084	0.0523068	1.208	0.650103	194.492	96.2194		143	1.206	0.16723	3.2	0.374166	0.32	0.093488	17.278	1.89839	2749.24	767.453
129	2.186	0.370494	115.4	26.4756	77.5686	25.4213	110.232	25.305			144	2.01	0.406387	3	0	0.254	0.0776917	2.67	1.06064	577.36	150.618		144	1.024	0.166271	3.4	0.244949	0.484	0.0592959	11.828	3.15381	4897.31	364.998
130	1.93	0.181439	133.6	30.6686	62.211	8.44887	95.7117	9.28157			145	2.105	0.123457	3.5	0.288675	0.325	0.089116	4.8675	1.54495	777.202	224.402		145	1.36	0.0801873	3.6	0.4	0.576	0.0492544	17.36	1.98128	4358.15	523.216
131	2.12833	0.174841	116	11.2487	67.4053	20.7004	106.575	26.5778			146	2.626	0.329463	3.6	0.244949	0.07	0.0352136	0.6	0.322134	112.42	53.0488		146	1.534	0.150552	3	0.316228	0.414	0.0996795	8.754	1.55181	3060.71	1130.15
132	2.26	0.2188	129.167	32.2122	53.9167	10.1891	93.6467	16.9192			147	2.018	0.359338	3.4	0.244949	0.106	0.0466476	0.796	0.228158	209.642	81.108		147	1.454	0.27874	3.4	0.244949	0.376	0.152565	11.342	2.32878	2569.39	789.292
133	1.94167	0.287361	113.5	20.5065	100.562	34.7816	120.323	21.0723			148	2.18	0.281407	3.4	0.244949	0.182	0.0742563	3.394	0.623639	437.244	171.336		148	1.49	0.117686	3.4	0.244949	0.794	0.290596	24.946	6.50843	5333.05	1971.07
134	2.34667	0.210913	145.833	25.5401	52.9962	11.8627	99.6967	20.0354			149	3.114	0.22241	3.4	0.244949	0.112	0.0381314	1.268	0.47563	178.964	61.383		149	1.91	0.103199	3.4	0.244949	0.698	0.155705	15.032	3.30592	3740.47	856.07
135	2.02667	0.185287	120.833	24.2836	62.7423	11.469	101.072	16.3751			150	1.822	0.19384	3	0.316228	0.092	0.0324654	2.07	0.658088	233.456	87.3939		150	1.52	0.458803	3.5	0.288675	0.4	0.167282	21.825	13.8619	3687.28	1368.17
136	2.536	0.127812	122.5	19.8473	50.461	5.26972	104.786	10.6782			151	2.266	0.230578	3.4	0.244949	0.238	0.0526688	3.496	0.614708	556.856	142.293		151	1.362	0.36045	4.2	0.489898	0.332	0.0665132	14.3	1.25352	2810.09	835.907
137	1.53167	0.126976	127	12.9422	105.529	20.4092	123.487	16.8348			152	2.335	0.174666	3.25	0.25	0.0675	0.00478714	1.14	0.295184	147.183	22.5408		152	1.845	0.015	3	0	0.22	0.11	14.625	0.965	1192.05	600.06
139	1.905	0.125213	149.667	20.4037	63.5832	13.7477	100.937	22.5702			153	2.354	0.346635	3.8	0.2	0.09	0.0581378	1.684	0.674601	186.154	98.4519		153	1.47	0.219431	3.4	0.244949	0.318	0.0938296	16.472	3.61065	2571.82	1041.87
140	2.32333	0.048074	122.333	27.3553	69.9585	13.8632	134.902	26.9326			154	2.152	0.307561	3.6	0.244949	0.198	0.0519038	4.678	2.56276	600.196	293.365		154	1.476	0.103904	2.8	0.2	0.162	0.0838093	10.126	5.90192	1221.75	647.069
141	2.27833	0.251123	163.5	32.6423	51.2533	14.7115	90.2083	22.5838			155	3.03	0.262164	3.4	0.244949	0.12	0.0644205	1.13	0.508822	225.794	120.505		155	2.09	0.366851	3.2	0.2	0.342	0.0732393	6.76	1.49335	1621.45	165.192
142	2.3	0.210761	109.333	27.3711	71.6952	15.4838	125.963	18.2697			156	2.266	0.398693	3	0	0.16	0.0541295	2.646	0.91582	421.586	135.82		156	1.772	0.323255	3	0	0.296	0.0707531	11.194	1.7624	1861.56	576.234
143	2.68833	0.221079	152.667	22.143	68.5947	11.7502	146.453	24.4282			157	2.9075	0.247567	3.25	0.25	0.1825	0.03966	1.3625	0.360679	330.447	88.2966		157	1.15	0.294686	3.4	0.244949	0.284	0.124362	12.83	3.80039	3038.86	1667.54
144	2.135	0.287689	177.5	29.606	59.5252	6.84984	98.7333	10.6893			158	1.968	0.402696	3.6	0.244949	0.22	0.0538516	4.098	1.33048	589.324	96.9344		158	1.142	0.242227	3	0.316228	0.142	0.0623217	3.816	1.75058	1391.61	568.628
145	2.265	0.27057	119.667	12.9555	80.213	20.4632	137.79	16.8455			159	1.938	0.469898	3.2	0.2	0.088	0.0370675	2.52	1.11233	227.928	131.915		159	1.505	0.260432	3.5	0.288675	0.2725	0.157553	16.635	6.33928	1898.43	966.822
146	1.964	0.15361	167	20.4165	73.537	17.4441	113.698	22.9517			160	2.918	0.389813	3.4	0.244949	0.13	0.0288097	2.236	0.532763	222.968	44.1046		160	1.34	0.107981	3.2	0.2	0.314	0.132989	18.342	5.16716	2110.69	688.716
147	2.508	0.162093	137.8	27.818	71.5262	11.7469	142.408	15.7064			161	1.854	0.150619	2.8	0.2	0.21	0.0626897	5.284	1.45281	543.478	153.78		161	1.2325	0.361556	3	0.408248	0.475	0.151685	24.1625	5.68269	4810.55	1474.51
148	2.408	0.193763	172.6	19.0358	64.5552	14.5085	120.132	19.4107			162	2.466	0.266451	3.2	0.2	0.28	0.0877496	2.876	0.480402	612.796	194.758		162	1.62	0.220839	2.8	0.374166	0.544	0.10142	13.688	2.2361	3516.84	636.3
149	2.316	0.211533	145.6	23.5257	65.2792	10.203	117.822	4.80588			163	2.444	0.128748	3	0	0.336	0.0643117	3.486	1.31881	687.5	128.734		163	1.402	0.277063	3.2	0.2	0.714	0.145623	17.878	7.25099	5967.69	1679.78
150	2.04167	0.159131	142.8	5.8258	74.1788	19.3267	117.988	22.9946			164	2.23	0.192562	3	0	0.238	0.0612699	4.358	0.824527	552.716	165.242		164	1.376	0.261469	3.4	0.4	0.436	0.130292	21.366	7.06794	2958.37	640.129
151	2.03333	0.202001	143	27.8699	69.0438	9.40487	119.085	24.2882			165	2.564	0.209538	3.2	0.2	0.146	0.0745386	1.944	0.870612	282.324	130.892		165	1.524	0.156288	2.6	0.678233	0.798	0.259469	19.42	11.0404	5605.7	2345.33
152	1.784	0.161295	144.333	29.4377	72.058	10.4903	104.62	14.4577			166	2.105	0.325692	3.25	0.25	0.1375	0.0803508	1.8575	0.7769	323.038	151.736		166	1.1775	0.269486	3.75	0.478714	0.7575	0.51824	23.8825	9.77739	5092.12	2608.05
153	2.09667	0.319392	126.8	17.5226	72.4242	23.1347	105.748	25.8263			168	2.328	0.32172	3.8	0.2	0.22	0.052915	3.53	1.09284	461.72	80.0698		168	1.57	0.127554	3	0	0.542	0.0843445	14.358	2.46094	3537.34	647.325
154	1.0525	0.189973	128.167	31.3011	95.4418	27.8161	70.7475	7.85218			169	2.826	0.341944	3	0.316228	0.03	0.02	0.66	0.55874	80.64	58.1748		169	1.284	0.272481	2.8	0.2	0.35	0.0987927	11.158	3.99329	2808.19	477.629
155	2.29333	0.277413	85.75	9.51643	48.8025	3.69136	89.935	10.1708			171	2.766	0.202425	3.4	0.4	0.042	0.0310483	0.736	0.529694	87.212	62.2345		171	1.4675	0.0892912	3.5	0.288675	0.39	0.116833	18.69	3.09866	2566.35	694.55
156	2.40667	0.098274	109	12.3261	62.8518	12.7556	122.8	24.5729			172	2.69	0.423568	3	0.316228	0.094	0.0328024	0.734	0.231465	191.336	69.9203		172	1.376	0.245736	3.2	0.2	0.412	0.159324	24.86	8.45474	2834.57	896.149
157	2.095	0.187914	148.833	29.783	76.7105	22.4204	117.298	22.5321			173	2.908	0.121877	3	0.316228	0.206	0.0561783	2.962	1.41189	362.156	101.831		173	2.304	0.282305	3	0	0.674	0.121062	13.292	4.62296	3006.87	563.627
158	2.232	0.126823	142.167	27.3086	69.9998	12.921	125.412	20.7866			174	2.504	0.267369	3	0	0.114	0.0201494	0.988	0.270211	249.502	67.9308		174	1.262	0.269433	3.4	0.244949	0.212	0.108922	1.42	0.808486	2475.14	1684.72
159	1.96333	0.224123	152	25.1933	78.0512	21.5673	113.723	28.0141			175	2.206	0.243877	3	0	0.358	0.123507	6.064	1.46118	805.778	245.356		175	1.794	0.261966	3.2	0.2	0.314	0.126752	18.256	3.2774	1705.48	505.805
160	1.99167	0.262443	137.833	33.9523	84.1712	23.1916	114.275	18.4304			176	1.908	0.414311	3.2	0.2	0.34	0.152807	4.094	1.55608	891.134	295.66		176	1.506	0.200838	3.2	0.374166	0.458	0.0900777	9.768	4.3605	3080.32	606.673
161	2.20667	0.193195	138.5	22.3379	67.8937	15.1696	117.023	24.7205			178	2.554	0.194258	2.6	0.4	0.026	0.0177764	0.254	0.161295	51.998	34.174		178	1.3225	0.147161	2.75	0.25	0.6875	0.204669	22.8825	10.203	4894.72	1292.77
162	1.86833	0.204229	141.833	29.9604	94.4005	28.362	127.337	26.3957			179	2.41	0.313895	3	0	0.156	0.047392	2.368	0.940927	314.538	81.0343		179	1.46	0.165831	2.75	0.478714	0.46	0.170734	8.565	2.89827	3278.36	1134.74
163	2.45667	0.201373	154.333	31.9924	58.2993	10.3739	113.725	19.5209			180	1.384	0.205002	3	0	0.11	0.0350714	4.95	1.55031	444.428	147.508		180	1.632	0.156665	2.8	0.2	1.02	0.326481	28.288	12.0072	6986.99	2926.45
164	1.86167	0.0746287	137.833	23.6607	85.4325	22.7603	125	25.8573			181	2.88	0.344616	2.6	0.244949	0.26	0.0626897	2.418	0.350077	452.44	85.898		181	1.49	0.0788458	3	0	0.37	0.108012	8.7275	4.77798	2412.89	613.976
165	2.12833	0.214109	151.5	31.3387	82.079	20.4445	133.525	32.8387			182	2.392	0.266822	2.8	0.2	0.156	0.0386782	2.438	0.783763	342.682	100.767		182	1.35	0.240603	3.4	0.244949	0.454	0.195566	11.96	4.46092	2939.17	955.758
166	1.9	0.212822	161.833	39.7998	80.741	26.8706	106.162	19.1773			184	2.72	0.233388	3.4	0.4	0.366	0.0852408	5.112	1.59326	664.07	149.563		184	1.508	0.306519	3.6	0.244949	0.372	0.105138	27.884	7.97246	2309.35	369.197
167	2.3	0.282748	128.667	23.2432	70.927	15.8618	118.4	11.4258			187	2.314	0.143059	3.6	0.244949	0.262	0.0627216	2.66	0.405623	576.63	156.348		187	1.572	0.155737	3.2	0.374166	0.35	0.0562139	7.136	0.828937	2209.29	318.955
168	1.875	0.187772	143.5	13.8486	85.524	22.0913	120.738	23.9111			188	1.95	0.196087	3	0.316228	0.276	0.0946361	4.122	1.46612	681.858	213.617		188	1.4475	0.14528	3.5	0.288675	0.4575	0.132437	16.8025	4.47835	3054.86	696.615
169	2.24333	0.277881	146.333	28.9812	76.7258	20.891	123.9	25.1918			189	2.05	0.511485	3	0	0.02	0.011547	0.5625	0.380359	57.34	38.7433		189	1.304	0.328704	2.8	0.374166	0.144	0.0660757	3.014	1.24914	1770.78	1177.06
170	2.46833	0.160362	150.167	30.5324	84.8447	16.6691	164.053	22.2389			190	2.1675	0.468319	3	0.408248	0.125	0.0225462	2.8825	1.16403	300.675	38.9039		190	2.0225	0.461129	3.25	0.25	0.4225	0.139127	4.9325	0.939498	1969.71	224.083
171	2.35667	0.318147	198.833	26.9536	79.3867	14.882	139.99	21.5388			191	2.916	0.543871	2.8	0.2	0.012	0.012	0.154	0.154	21.456	21.456		191	1.884	0.320009	2.6	0.4	0.604	0.0791581	15.516	5.43146	3563.01	689.731
172	2.23333	0.265865	169.667	26.1058	96.4352	19.4079	157.315	10.5243			193	3.158	0.185051	2.8	0.374166	0.068	0.0321559	0.356	0.13779	110.102	56.2948		193	2.204	0.306751	3.2	0.374166	0.636	0.122254	22.1	7.6574	3267.41	1006.88
173	2.17667	0.197833	190.667	12.7558	65.9612	8.98152	119.637	22.5027			194	2.238	0.375505	3.2	0.2	0	0	0	0	0	0		194	1.5025	0.111533	3.25	0.25	0.375	0.133323	10.5025	1.7463	2437.53	862.968
174	2.21833	0.141172	145	27.2739	72.8198	6.6166	131.323	10.8952			195	2.286	0.258874	3.2	0.2	0.098	0.0356931	1.92	0.670246	208.786	75.7452		195	2.104	0.1897	3.6	0.244949	0.696	0.273452	17.138	5.17803	3194.8	1138.18
175	2.21333	0.355965	159.167	13.2046	56.5183	12.99	89.1083	13.7374			196	2.715	0.284678	3.25	0.25	0.4625	0.0332603	4.1625	0.706345	870.202	86.9001		196	1.26	0.254231	3	0	0.32	0.147592	19.665	5.98046	2188.47	735.772
176	2.05167	0.165477	108	16.6513	64.2043	8.65433	103.55	6.54834			197	2.336	0.236951	3.2	0.2	0.156	0.0587878	3.096	1.51231	325.718	112.771		197	1.255	0.285029	3	0.408248	0.3375	0.10499	16.1525	3.3811	3571.57	1690.2
178	2.25833	0.204082	125.5	7.9362	75.4742	16.4206	130.09	16.6536			198	2.818	0.208648	3	0.316228	0.422	0.142632	6.922	2.46188	731.832	259.155		198	1.44667	0.253136	3	0	0.483333	0.137396	25.4167	7.46479	3340.48	772.094
179	1.65167	0.16989	157.667	20.1836	69.8142	12.8702	90.62	15.0008			199	2.5075	0.349699	3.5	0.288675	0.215	0.0730867	5	0.770855	420.788	133.096		199	2.2225	0.464047	3.5	0.288675	1.5525	0.354927	27.5125	6.72971	7150.56	1679.74
180	1.76667	0.203022	109.833	18.1813	99.1973	31.0857	124.037	29.3908			200	2.268	0.293247	2.8	0.2	0.258	0.063671	4.786	0.311329	547.29	92.7009		200	2.134	0.158732	3.4	0.244949	0.96	0.275445	17.486	5.6442	4983.87	1786.18
181	1.90167	0.354141	150.333	35.6218	118.069	38.546	135.727	19.8244			203	2.822	0.307756	2.8	0.2	0.188	0.0390384	3.164	1.06169	336.23	61.3739		203	1.455	0.117863	2.75	0.25	0.34	0.0989107	5.6225	1.56394	2357.6	606.312
182	1.74167	0.206291	164.5	24.026	77.3627	7.88336	108.362	13.012			204	2.066	0.112098	3.2	0.374166	0.138	0.0171464	2.3	0.592891	335.752	26.8245		204	1.264	0.241673	3.2	0.2	0.432	0.111777	8.188	2.83836	3578.31	743.278
183	1.602	0.178028	131.333	15.7706	89.3736	10.0532	113.368	9.58587			205	1.986	0.128281	3.2	0.2	0.1	0.03755	2.196	0.675526	245.852	90.1659		205	0.984	0.191536	3.4	0.244949	0.306	0.116645	11.896	2.84048	3275.4	1199.41
184	1.74	0.184878	137.4	11.6172	62.1072	15.5461	84.818	17.8663			206	1.998	0.217748	3.2	0.2	0.598	0.209366	13.94	4.79058	1675.07	615.566		206	1.0425	0.336288	3.5	0.288675	0.405	0.188525	12.62	3.88572	3447.32	1070.22
185	1.91667	0.150945	102.8	21.655	71.1267	15.9035	106.437	19.2307			210	2.498	0.310297	3.4	0.244949	0.522	0.228679	4.108	2.09478	1104.23	550.908		210	1.96	0.271662	2.75	0.25	0.3075	0.132185	8.895	2.02869	1844.4	974.871
186	2.82	0.171445	129	23.3081	56.8487	13.0885	125.548	26.0861			212	2.328	0.377444	3.2	0.2	0.168	0.0789557	4.496	1.948	358.122	119.128		212	1.3175	0.267251	3.25	0.25	0.3475	0.0475	19.6425	8.25532	2801.59	354.695
187	2.238	0.243442	152.167	31.6158	49.8972	10.9362	85.974	13.9577			213	2.012	0.225153	3.4	0.244949	0.446	0.0971905	7.364	1.61472	1242.55	408.03		213	1.414	0.22324	3.8	0.2	0.486	0.25402	23.918	6.07036	3753.28	1616.35
188	1.76833	0.25761	104.2	16.9186	76.1977	29.1554	94.0583	26.2143			214	2.005	0.376619	3.75	0.25	0.4125	0.132689	7.49	2.77688	1011.42	280.519		214	1.408	0.263826	3.4	0.244949	0.322	0.0472652	17.004	3.82253	2638.8	623.853
189	2.32667	0.227547	114	31.7721	76.9422	22.9065	132.977	30.0786			215	2.24	0.233345	2.75	0.25	0.185	0.0931397	2.1125	0.762369	422.875	193.92		215	1.182	0.164146	3.8	0.2	0.492	0.170306	17.32	4.94512	3958.89	1051.84
190	2.53333	0.184872	161.167	36.4567	48.2238	12.2459	95.5733	20.2995			217	3.185	0.275877	3	0	0.4775	0.0875	4.4475	0.873855	740.072	97.0847		217	1.828	0.226305	3	0	0.642	0.188664	21.468	2.63992	3428.52	737.204
191	2.51333	0.208561	115.833	24.6027	46.7878	11.4144	91.585	17.6036			218	2.198	0.237874	3	0	0.08	0.0291548	1.814	0.398705	174.182	44.5651		218	1.81	0.287141	3.2	0.2	0.672	0.0661362	24.07	2.04075	3933.77	469.291
192	2.335	0.184657	111	21.3354	59.135	6.22847	111.25	10.6287			219	2.024	0.259087	3.2	0.2	0.228	0.0563383	4.346	1.61088	582.138	119.215		219	1.315	0.152124	4	0	0.6575	0.152391	31.0125	6.47477	5042.14	1002.47
193	2.84	0.04	134.833	12.8826	24.628	13.914	58.165	33.415			Mean	2.47647	0.288379	3.1338	0.226577	0.153966	0.0506571	2.49256	0.889204	332.852	112.045		Mean	1.61118	0.250465	3.55339	0.25811	0.633858	0.186491	19.1424	5.45462	3982.31	1168.52
194	2.12833	0.204669	70.5	40.5	71.8332	16.6759	114.548	16.3744
195	2.528	0.114342	138.833	19.8451	44.541	9.1193	92.244	19.2975			Suinong14	1.8475	0.494914	3	0	0.000769179	0.000265445	3.5	0.866025	653.862	226.102		Suinong14	1.63875	0.319366	3.5	0.188982	0.43	0.0532514	15.4488	4.67561	3315.98	702.202
196	2.52833	0.213001	111.8	23.3867	69.4135	23.3076	125.823	28.8587			ZYD00006	0.986	0.0626578	3.2	0.374166	0.00153363	0.000722055	6	3.01662	1146.76	608.244		ZYD00006	0.938571	0.104777	3.85714	0.26082	0.457143	0.0506958	37.3743	9.14089	5242.27	840.785
197	1.56	0.251449	152.5	34.9769	96.5545	16.5782	114	23.523
198	2.296	0.27786	138.167	28.509	74.574	17.2782	131.024	21.9331
199	1.915	0.109628	158.8	26.5827	87.9577	10.3861	138.888	17.1986
200	2.31333	0.0654047	168.333	20.8433	60.5172	8.10052	114	12.4116
203	2.294	0.17377	138.167	15.0431	73.6272	11.0622	135.478	16.7158
204	2.35	0.129074	164.2	20.2593	49.866	6.57933	97.36	14.8604
205	1.608	0.302546	118	18.0111	36.0712	9.23354	45.874	12.0824
206	2.525	0.203367	55.6	14.6445	46.8843	6.54751	95.16	13.9947
207	2.705	0.215387	115.333	16.962	47.1667	3.94645	104.512	9.7407
208	2.29167	0.126344	126.667	11.8058	61.6075	13.6391	113.448	22.0487
210	2.29	0.0941807	137.5	26.723	51.896	11.6212	97.196	20.597
212	2.496	0.190541	117.8	24.9628	48.3222	5.78493	97.524	8.83095
213	2.83	0.18421	118.2	10.7023	44.9443	3.83922	103.412	8.42903
214	2.455	0.180827	125.333	10.2165	58.6242	5.89622	116.198	11.3438
215	2.166	0.209132	140.833	13.7487	55.2662	2.26477	98.846	10.2308
217	2.34833	0.167121	119.8	12.3992	49.527	4.0487	95.1617	9.14238
218	2.08	0.254192	115.333	11.0805	63.7008	19.5416	90.7583	10.9363
219	2.23667	0.310373	110	13.2539	66.2535	9.50245	114.137	12.2102
Mean	2.16679	0.206043	138.333	14.7979	64.1469	12.646	105.333	16.1157
Lee68	3.04	0.390704	121.2	13.9155	43.2896	7.94925	100.002	11.4818
Suinong14	2.554	0.0964158	127.4	10.9389	50.1126	4.75126	105.114	9.02626
ZYD00006	1.08667	0.227855	108	9.75363	113.52	17.2892	89.1083	8.04719

## Sheet: Supplemental Table S2
Supplemental Table S2 QTL mapping results related to the resistance of Heterodera glycines infection including female index (FI) and cysts per gram root (CGR) in 199 CSSLs and Meloidogyne incongnita infection including galling index (GI), reproduction (RF), egg massed per gram root (EMR) and eggs per gram root (EGR) in 177 CSSLs by K* and MQM mapping
Heterodera glycines - Test1																																					Meloidogyne incongnita - Test1
FI-K*									CGR-K*									FI-MQM									CGR-MQM										GI-K*									RF-K*
Nr	Group	Position	Locus	K*	Signif.	Mean-a	Mean-b		Nr	Group	Position	Locus	K*	Signif.	Mean-a	Mean-b		Nr	Group	Position	Locus	LOD	Variance	% Expl.	Additive		Nr	Group	Position	Locus	LOD	Variance	% Expl.	Additive			Nr	Group	Position	Locus	K*	Signif.	Mean-a	Mean-b		Nr	Group	Position	Locus
11	1	0.952	Block95	2.867	*	100.219	106.383		10	1	0.889	Block84	3.264	*	59.2905	65.4239		1	1	0.012	Block1	0.02	368.601	0	-0.643102		1	1	0.012	Block1	0.07	255.048	0.2	-1.00489			27	1	2.206	Block278	3.303	*	3.23036	3.11527		107	1	48.063	Block471
27	1	2.206	Block278	5.254	**	99.8333	106.464		11	1	0.952	Block95	8.298	****	56.7156	65.5421		2	1	0.239	Block2	0.01	368.68	0	-0.467937		2	1	0.239	Block2	0.05	255.154	0.1	-0.866931			30	1	2.697	Block287	3.237	*	3.22931	3.11527		108	1	48.381	Block472
28	1	2.574	Block281	7.087	***	98.9677	106.636		87	1	33.725	Block423	3.696	*	58.2611	65.5397		3	1	0.412	Block30	0.05	368.338	0.1	-0.977734		3	1	0.412	Block30	0.26	253.93	0.6	-1.84291			31	1	2.808	Block301	3.237	*	3.22931	3.11527		137	1	55.305	Block532
29	1	2.632	Block283	4.157	**	100.885	106.379		88	1	38.725	Block426	4.128	**	57.95	65.6326		4	1	0.47	Block32	0.07	368.183	0.2	-1.12628		4	1	0.47	Block32	0.3	253.703	0.7	-1.94985			32	1	3.046	Block307	3.45	*	3.235	3.11331		141	1	55.879	Block539
30	1	2.697	Block287	5.026	**	99.8839	106.337		89	1	42.986	Block429	6.691	***	54.32	65.4254		5	1	0.514	Block34	0.03	368.495	0.1	-0.768864		5	1	0.514	Block34	0.21	254.208	0.5	-1.64474			33	1	3.125	Block310	5.471	**	3.26406	3.1051		142	1	56.152	Block540
31	1	2.808	Block301	5.026	**	99.8839	106.337		90	1	43.007	Block431	6.597	**	54.32	65.3503		6	1	0.536	Block41	0.05	368.333	0.1	-1.0004		6	1	0.536	Block41	0.13	254.684	0.3	-1.33325			34	1	3.162	Block315	6.145	**	3.27258	3.10437		143	1	56.311	Block541
32	1	3.046	Block307	3.904	**	99.9273	106.406		91	1	43.074	Block434	7	***	54.32	65.8594		7	1	0.575	Block46	0.07	368.183	0.2	-1.12628		7	1	0.575	Block46	0.3	253.703	0.7	-1.94985			35	1	3.39	Block317	7.788	***	3.2803	3.10021		175	2	3.806	Block628
33	1	3.125	Block310	4.59	**	99.5765	106.449		92	1	43.147	Block438	7.622	***	54.05	65.7827		8	1	0.71	Block62	0.04	368.464	0.1	-0.839228		8	1	0.71	Block62	0.11	254.827	0.2	-1.20634			36	1	3.46	Block318	9.295	****	3.30167	3.09952		176	2	4.069	Block646
34	1	3.162	Block315	7.5	***	97.9455	106.8		93	1	43.213	Block440	6.785	***	54.32	65.7827		9	1	0.77	Block64	0.08	368.12	0.2	-1.22143		9	1	0.77	Block64	0.17	254.435	0.4	-1.53345			37	1	3.517	Block319	10.267	****	3.31207	3.09884		264	2	14.015	Block944
35	1	3.39	Block317	8.94	****	97.527	107.114		94	1	43.462	Block441	6.906	***	54.32	65.8296		10	1	0.889	Block84	0.58	363.882	1.3	-3.42921		10	1	0.889	Block84	1	249.617	2.3	-3.74909			38	1	3.542	Block322	10.02	****	3.31207	3.10021		387	3	1.901	Block1481
36	1	3.46	Block318	7.984	****	97.4706	106.952		95	1	43.55	Block442	6.906	***	54.32	65.8296		11	1	0.952	Block95	0.62	363.536	1.4	-3.09862		11	1	0.952	Block95	1.74	245.374	3.9	-4.3012			39	1	3.576	Block323	8.403	****	3.29194	3.10021		388	3	2.024	Block1486
37	1	3.517	Block319	7.195	***	97.6667	106.855		96	1	43.59	Block444	7.683	***	54.5647	65.8296		12	1	1.055	Block123	0.84	361.645	1.9	-4.89602		12	1	1.055	Block123	0.88	250.308	2	-4.16206			40	1	3.597	Block325	10.02	****	3.31207	3.10021		393	3	3.318	Block1516
38	1	3.542	Block322	6.749	***	97.6667	106.601		97	1	43.806	Block445	7.683	***	54.5647	65.8296		13	1	1.088	Block124	0.92	360.997	2.1	-5.08908		13	1	1.088	Block124	0.96	249.868	2.2	-4.31554			41	1	3.628	Block326	10.02	****	3.31207	3.10021		394	3	3.404	Block1518
39	1	3.576	Block323	4.996	**	99.0686	106.601		98	1	43.854	Block446	6.906	***	54.32	65.8296		14	1	1.161	Block127	0.74	362.465	1.7	-4.62827		14	1	1.161	Block127	0.84	250.53	1.9	-4.09166			42	1	3.787	Block329	10.02	****	3.31207	3.10021		446	3	8.688	Block1651
40	1	3.597	Block325	6.749	***	97.6667	106.601		99	1	43.895	Block447	6.906	***	54.32	65.8296		15	1	1.206	Block131	0.67	363.082	1.5	-4.17784		15	1	1.206	Block131	0.35	253.405	0.8	-2.50942			43	1	3.841	Block335	8.403	****	3.29194	3.10021		447	3	8.722	Block1653
41	1	3.628	Block326	6.981	***	97.4031	106.598		100	1	43.972	Block453	10.408	****	53.695	65.4977		16	1	1.244	Block133	0.16	367.431	0.4	-1.97187		16	1	1.244	Block133	0.03	255.269	0.1	-0.736832			44	1	3.902	Block338	10.02	****	3.31207	3.10021		490	3	19.384	Block1747
42	1	3.787	Block329	6.981	***	97.4031	106.598		101	1	44.074	Block454	11.151	*****	53.0474	65.5006		17	1	1.337	Block146	0.27	366.491	0.6	-2.3351		17	1	1.337	Block146	0.04	255.218	0.1	-0.75453			45	1	3.925	Block341	8.403	****	3.29194	3.10021		585	3	41.803	Block1962
43	1	3.841	Block335	4.43	**	99.4	106.598		102	1	44.372	Block456	7.803	***	53.9875	65.5006		18	1	1.444	Block158	0.12	367.71	0.3	-1.58384		18	1	1.444	Block158	0.01	255.425	0	-0.271655			46	1	3.969	Block342	5.893	**	3.26379	3.10842		771	4	51.595	Block2486
44	1	3.902	Block338	6.981	***	97.4031	106.598		103	1	45.111	Block460	4.523	**	53.55	65.1768		19	1	1.528	Block173	0.12	367.71	0.3	-1.58384		19	1	1.528	Block173	0.01	255.425	0	-0.271655			47	1	4.093	Block343	4.397	**	3.2537	3.11236		779	5	2.184	Block2506
45	1	3.925	Block341	4.43	**	99.4	106.598		105	1	45.822	Block466	2.775	*	55.1667	64.8741		20	1	1.561	Block177	0.05	368.333	0.1	-0.907771		20	1	1.561	Block177	0.01	255.402	0	-0.319091			50	1	4.676	Block348	3.442	*	3.27188	3.1193		780	5	2.269	Block2507
46	1	3.969	Block342	4.424	**	99.1909	106.552		106	1	46.818	Block468	4.223	**	54.2333	64.8741		21	1	1.6	Block183	0.12	367.71	0.3	-1.58384		21	1	1.6	Block183	0.01	255.425	0	-0.271655			51	1	4.956	Block349	3.442	*	3.27188	3.1193		781	5	2.51	Block2509
47	1	4.093	Block343	4.287	**	99	106.5		107	1	48.063	Block471	5.139	**	50.7	64.8455		22	1	1.795	Block216	0.23	366.791	0.5	-2.06314		22	1	1.795	Block216	0.03	255.3	0.1	-0.58017			55	1	5.43	Block365	2.72	*	3.25937	3.12729		782	5	2.545	Block2510
48	1	4.225	Block345	5.891	**	97.128	106.51		108	1	48.381	Block472	5.086	**	50.7	64.7674		23	1	1.875	Block236	0.18	367.199	0.4	-1.79329		23	1	1.875	Block236	0.03	255.304	0.1	-0.558624			57	1	5.497	Block368	2.875	*	3.25937	3.12312		783	5	2.696	Block2511
49	1	4.522	Block347	5.016	**	97.3783	106.51		109	1	48.451	Block475	4.891	**	53.4667	64.7947		24	1	1.907	Block240	0.1	367.89	0.2	-1.351		24	1	1.907	Block240	0.01	255.406	0	-0.322208			58	1	5.571	Block371	3.503	*	3.27667	3.12391		784	5	2.733	Block2512
50	1	4.676	Block348	9.224	****	93.88	106.751		114	1	49.337	Block482	3.363	*	55.9571	64.9272		25	1	1.996	Block259	0.13	367.675	0.3	-1.50997		25	1	1.996	Block259	0.01	255.404	0	-0.327929			60	1	5.706	Block375	2.828	*	3.25937	3.12391		785	5	2.763	Block2515
51	1	4.956	Block349	7.363	***	95.3526	106.521		150	2	0.604	Block563	5.402	**	72.1917	63.6527		26	1	2.05	Block266	0.13	367.675	0.3	-1.50997		26	1	2.05	Block266	0.01	255.404	0	-0.327929			62	1	6.065	Block378	3.707	*	3.27667	3.12081		786	5	2.851	Block2516
52	1	5.155	Block359	3.015	*	100.248	105.992		151	2	0.888	Block574	6.157	**	70.2677	63.1383		27	1	2.206	Block278	0.72	362.633	1.7	-3.4481		27	1	2.206	Block278	0.07	255.014	0.2	0.925262			63	1	6.25	Block381	3.503	*	3.27667	3.12391		787	5	3.395	Block2518
53	1	5.283	Block360	3.756	*	99.5208	105.992		152	2	0.973	Block579	8.681	****	72.812	63.1095		28	1	2.574	Block281	0.98	360.526	2.2	-3.9512		28	1	2.574	Block281	0	255.456	0	0.0129532			64	1	6.274	Block382	2.828	*	3.25937	3.12391		877	5	32.307	Block2775
54	1	5.382	Block362	5.679	**	97.885	106.172		153	2	1.024	Block582	10.939	*****	73.875	62.9		29	1	2.632	Block283	0.55	364.135	1.3	-2.85548		29	1	2.632	Block283	0.02	255.323	0.1	0.483495			66	1	6.465	Block387	3.707	*	3.27667	3.12081		878	5	32.336	Block2776
55	1	5.43	Block365	8.146	****	94.7579	106.32		154	2	1.11	Block583	10.804	****	73.875	62.9912		30	1	2.697	Block287	0.65	363.292	1.5	-3.22652		30	1	2.697	Block287	0.09	254.922	0.2	1.00693			67	1	6.531	Block389	3.554	*	3.27667	3.12312		879	5	32.37	Block2782
56	1	5.469	Block366	8.454	****	94.6095	106.32		155	2	1.45	Block584	13.26	******	74.2923	62.7982		31	1	2.808	Block301	0.65	363.292	1.5	-3.22652		31	1	2.808	Block301	0.09	254.922	0.2	1.00693			68	1	6.65	Block391	3.707	*	3.27667	3.12081		880	5	32.613	Block2784
57	1	5.497	Block368	7.854	***	94.7579	106.107		156	2	1.508	Block585	11.079	*****	73.263	62.7982		32	1	3.046	Block307	0.69	362.962	1.6	-3.23938		32	1	3.046	Block307	0.03	255.303	0.1	0.525073			69	1	7.355	Block393	2.97	*	3.25937	3.12157		881	5	32.764	Block2786
58	1	5.571	Block371	7.24	***	94.8889	106.094		157	2	1.733	Block586	13.145	******	74.7393	62.4899		33	1	3.125	Block310	0.75	362.385	1.7	-3.35161		33	1	3.125	Block310	0	255.433	0	0.202266			106	1	46.818	Block468	2.805	*	2.91875	3.14586		882	5	32.909	Block2787
59	1	5.621	Block374	5.478	**	97.6762	106.094		158	2	1.858	Block588	10.721	****	74.3885	62.6876		34	1	3.162	Block315	1.29	357.922	2.9	-4.42727		34	1	3.162	Block315	0.01	255.368	0	-0.399452			114	1	49.337	Block482	4.09	**	2.9125	3.14772		895	5	34.202	Block2815
60	1	5.706	Block375	5.037	**	98.1737	106.094		159	2	2.185	Block589	9.809	****	72.9133	62.6723		35	1	3.39	Block317	1.66	354.856	3.8	-4.79359		35	1	3.39	Block317	0.1	254.86	0.2	-0.992426			132	1	51.748	Block522	6.543	**	2.775	3.15018		941	5	40.005	Block2909
61	1	5.789	Block376	5.478	**	97.6762	106.094		160	2	2.349	Block590	9.919	****	72.9133	62.612		36	1	3.46	Block318	1.52	356.034	3.5	-4.74046		36	1	3.46	Block318	0.2	254.259	0.5	-1.45331			183	2	4.678	Block674	3.427	*	3.02581	3.1575		942	5	40.051	Block2911
62	1	6.065	Block378	7.391	***	94.8889	106.37		161	2	2.447	Block591	9.919	****	72.9133	62.612		37	1	3.517	Block319	1.39	357.088	3.2	-4.59438		37	1	3.517	Block319	0.15	254.551	0.4	-1.27857			184	2	4.808	Block675	3.507	*	3.02581	3.1586		943	5	40.086	Block2912
63	1	6.25	Block381	7.24	***	94.8889	106.094		162	2	2.818	Block592	11.555	*****	73.4	62.459		38	1	3.542	Block322	1.14	359.204	2.6	-4.13939		38	1	3.542	Block322	0.1	254.867	0.2	-1.02749			185	2	4.902	Block677	4.273	**	3.01875	3.16085		944	5	40.134	Block2914
64	1	6.274	Block382	5.037	**	98.1737	106.094		163	2	2.909	Block593	13.623	******	74.4355	62.2657		39	1	3.576	Block323	0.93	360.882	2.1	-3.68336		39	1	3.576	Block323	0.07	255.047	0.2	-0.838822			217	2	7.935	Block808	4.467	**	2.975	3.15412		945	5	40.162	Block2917
65	1	6.314	Block384	5.478	**	97.6762	106.094		164	2	3.015	Block595	13.482	******	74.4355	62.3461		40	1	3.597	Block325	1.14	359.204	2.6	-4.13939		40	1	3.597	Block325	0.1	254.867	0.2	-1.02749			218	2	8.031	Block810	4.467	**	2.975	3.15412		950	5	40.436	Block2928
66	1	6.465	Block387	7.391	***	94.8889	106.37		165	2	3.041	Block596	13.443	******	74.67	62.3461		41	1	3.628	Block326	1.17	358.906	2.7	-4.25407		41	1	3.628	Block326	0.08	254.979	0.2	-0.935357			219	2	8.064	Block811	4.887	**	2.96316	3.15442		951	5	40.654	Block2930
67	1	6.531	Block389	7.439	***	94.8889	106.235		166	2	3.097	Block597	14.24	******	74.6677	62.3461		42	1	3.787	Block329	1.17	358.906	2.7	-4.25407		42	1	3.787	Block329	0.08	254.979	0.2	-0.935357			220	2	8.119	Block814	4.98	**	2.96667	3.15483		952	5	40.7	Block2933
68	1	6.65	Block391	7.391	***	94.8889	106.37		167	2	3.125	Block599	11.707	*****	73.8742	62.4139		43	1	3.841	Block335	0.89	361.259	2	-3.59878		43	1	3.841	Block335	0.04	255.212	0.1	-0.64811			235	2	8.843	Block854	6.174	**	2.95	3.15579		953	5	40.914	Block2934
69	1	7.355	Block393	4.009	**	98.1737	106.087		168	2	3.229	Block601	11.742	*****	73.8742	62.4437		44	1	3.902	Block338	1.17	358.906	2.7	-4.25407		44	1	3.902	Block338	0.08	254.979	0.2	-0.935357			236	2	9.058	Block855	5.841	**	2.94737	3.15579		954	5	40.945	Block2935
70	1	8.91	Block395	4.281	**	98.1737	106.426		169	2	3.263	Block603	15.909	*******	76.0964	62.2911		45	1	3.925	Block341	0.89	361.259	2	-3.59878		45	1	3.925	Block341	0.04	255.212	0.1	-0.64811			237	2	9.112	Block856	4.566	**	2.96667	3.15579		955	5	41.121	Block2936
71	1	9.054	Block396	4.82	**	97.3235	106.414		170	2	3.519	Block607	14.671	******	75.1483	62.4234		46	1	3.969	Block342	0.89	361.272	2	-3.68075		46	1	3.969	Block342	0.02	255.345	0	-0.448494			240	2	9.273	Block864	3.328	*	2.99412	3.15579		956	5	41.172	Block2937
72	1	9.691	Block397	4.802	**	97.3235	106.413		171	2	3.586	Block611	13.621	******	76.5478	62.6149		47	1	4.093	Block343	0.88	361.37	2	-3.75		47	1	4.093	Block343	0.02	255.367	0	-0.410676			241	2	9.416	Block868	4.242	**	2.91	3.15579		960	5	41.426	Block2959
73	1	9.929	Block398	4.723	**	97.3235	106.336		172	2	3.636	Block622	12.747	******	76.5478	62.575		48	1	4.225	Block345	1.15	359.098	2.6	-4.69117		48	1	4.225	Block345	0.01	255.405	0	-0.338667			242	2	9.493	Block869	4.242	**	2.91	3.15579		961	5	41.912	Block2961
74	1	14.842	Block399	4.637	**	98.3286	106.336		173	2	3.67	Block623	12.624	******	76.5478	62.6074		49	1	4.522	Block347	1.09	359.589	2.5	-4.70771		49	1	4.522	Block347	0.01	255.415	0	-0.315638			246	2	9.853	Block887	4.752	**	2.97	3.15447		962	5	42.027	Block2963
75	1	16.547	Block401	5.817	**	97.7231	106.582		174	2	3.721	Block624	12.746	******	76.5478	62.5167		50	1	4.676	Block348	1.9	352.922	4.3	-6.56628		50	1	4.676	Block348	0.07	255.023	0.2	-1.08464			247	2	10.067	Block888	4.285	**	3	3.15779		963	5	42.194	Block2965
76	1	22.03	Block402	5.184	**	97.968	106.582		175	2	3.806	Block628	3.691	*	66.208	61.9048		51	1	4.956	Block349	1.38	357.197	3.1	-5.7371		51	1	4.956	Block349	0.01	255.418	0	-0.326325			286	2	39.477	Block1011	2.725	*	2.93333	3.13857		1221	7	8.928	Block3689
77	1	24.532	Block403	4.946	**	97.968	106.376		176	2	4.069	Block646	5.619	**	67.7563	61.556		52	1	5.155	Block359	0.39	365.476	0.9	-2.72187		52	1	5.155	Block359	0.02	255.339	0	0.513408			287	2	39.828	Block1013	2.726	*	2.93333	3.13738		1222	7	9.425	Block3692
87	1	33.725	Block423	3.46	*	97.4222	107.024		177	2	4.261	Block659	10.721	****	74.6115	62.8272		53	1	5.283	Block360	0.44	365.024	1	-2.94444		53	1	5.283	Block360	0.01	255.381	0	0.417082			291	2	40.456	Block1025	2.883	*	3.03529	3.15051		1223	7	9.623	Block3696
88	1	38.725	Block426	3.529	*	97.3556	107.011		178	2	4.32	Block660	10.622	****	74.6115	62.9069		54	1	5.382	Block362	0.73	362.592	1.7	-4.1156		54	1	5.382	Block362	0.01	255.382	0	0.449633			292	2	40.555	Block1026	2.883	*	3.03529	3.15051		1224	7	9.682	Block3707
89	1	42.986	Block429	3.738	*	95.8867	106.591		179	2	4.372	Block662	11.094	*****	74.4333	62.7358		55	1	5.43	Block365	1.18	358.843	2.7	-5.26922		55	1	5.43	Block365	0.01	255.425	0	-0.292766			293	2	40.625	Block1027	3.053	*	3.03529	3.15404		1225	7	9.773	Block3725
90	1	43.007	Block431	3.658	*	95.8867	106.485		180	2	4.456	Block664	10.328	****	74.4269	62.7302		56	1	5.469	Block366	1.25	358.274	2.8	-5.23254		56	1	5.469	Block366	0.02	255.34	0	-0.550962			300	2	41.585	Block1041	4.03	**	3.0125	3.16123		1226	7	9.84	Block3726
91	1	43.074	Block434	3.75	*	95.8867	106.78		181	2	4.538	Block668	12.1	*****	75.7792	62.8655		57	1	5.497	Block368	0.97	360.621	2.2	-4.79355		57	1	5.497	Block368	0	255.449	0	0.140634			301	2	41.702	Block1042	3.02	*	3.02667	3.1589		1227	7	10.071	Block3730
92	1	43.147	Block438	4.566	**	95.3688	106.646		182	2	4.592	Block670	11.361	*****	75.5625	62.897		58	1	5.571	Block371	0.9	361.163	2.1	-4.69854		58	1	5.571	Block371	0	255.454	0	-0.0638616			302	2	41.803	Block1046	6.495	**	2.94667	3.1589		1228	7	10.106	Block3731
93	1	43.213	Block440	3.62	*	95.8867	106.646		183	2	4.678	Block674	5.637	**	70.2206	62.897		59	1	5.621	Block374	0.68	363.038	1.6	-3.86637		59	1	5.621	Block374	0	255.454	0	-0.0606075			303	2	41.874	Block1050	3.07	*	2.95556	3.14352		1229	7	10.161	Block3736
94	1	43.462	Block441	3.685	*	95.8867	106.711		184	2	4.808	Block675	5.938	**	70.2206	62.6927		60	1	5.706	Block375	0.61	363.613	1.4	-3.79739		60	1	5.706	Block375	0.01	255.401	0	0.391841			304	2	42.422	Block1051	3.095	*	2.95556	3.14386		1230	7	10.248	Block3743
95	1	43.55	Block442	3.685	*	95.8867	106.711		185	2	4.902	Block677	7.223	***	71.2286	62.5525		61	1	5.789	Block376	0.68	363.038	1.6	-3.86637		61	1	5.789	Block376	0	255.454	0	-0.0606075			305	2	42.493	Block1062	3.726	*	2.95556	3.15902		1231	7	10.287	Block3744
96	1	43.59	Block444	3.242	*	97.0294	106.711		186	2	5.013	Block692	14.041	******	76.76	62.2601		62	1	6.065	Block378	1.29	357.923	2.9	-5.74064		62	1	6.065	Block378	0	255.437	0	-0.237247			306	2	42.668	Block1063	3.726	*	2.95556	3.15902		1232	7	10.335	Block3747
97	1	43.806	Block445	3.242	*	97.0294	106.711		187	2	5.095	Block695	11.614	*****	75.5625	62.6453		63	1	6.25	Block381	0.9	361.163	2.1	-4.69854		63	1	6.25	Block381	0	255.454	0	-0.0638616			307	2	42.759	Block1069	3.416	*	2.95556	3.15331		1379	8	9.502	Block4228
98	1	43.854	Block446	3.685	*	95.8867	106.711		188	2	5.152	Block698	8.928	****	72.9586	62.6453		64	1	6.274	Block382	0.61	363.613	1.4	-3.79739		64	1	6.274	Block382	0.01	255.401	0	0.391841			308	2	42.967	Block1075	3.859	**	2.95556	3.16229		1380	8	9.566	Block4229
99	1	43.895	Block447	3.685	*	95.8867	106.711		189	2	5.386	Block711	19.626	*******	78.9737	62.4102		65	1	6.314	Block384	0.68	363.038	1.6	-3.86637		65	1	6.314	Block384	0	255.454	0	-0.0606075			309	2	43.026	Block1076	3.907	**	2.95556	3.16336		1381	8	9.724	Block4231
100	1	43.972	Block453	4.336	**	96.715	106.438		190	2	5.442	Block714	19.774	*******	78.9737	62.4249		66	1	6.465	Block387	1.29	357.923	2.9	-5.74064		66	1	6.465	Block387	0	255.437	0	-0.237247			310	2	43.228	Block1079	3.765	*	2.95556	3.16019		1382	8	9.86	Block4233
101	1	44.074	Block454	5.619	**	95.5105	106.513		191	2	5.489	Block715	19.406	*******	78.9737	62.4727		67	1	6.531	Block389	1.08	359.695	2.5	-5.17742		67	1	6.531	Block389	0	255.437	0	-0.234296			311	2	43.375	Block1081	5.463	**	2.92	3.16123		1383	8	9.961	Block4234
102	1	44.372	Block456	3.441	*	96.4688	106.513		192	2	5.553	Block719	25.949	*******	83.125	62.2564		68	1	6.65	Block391	1.29	357.923	2.9	-5.74064		68	1	6.65	Block391	0	255.437	0	-0.237247			312	2	43.533	Block1088	3.095	*	2.95556	3.14386		1384	8	10.007	Block4236
106	1	46.818	Block468	4.086	**	94.3778	106.12		193	2	5.644	Block720	25.02	*******	83.6333	62.2564		69	1	7.355	Block393	0.64	363.36	1.5	-3.95677		69	1	7.355	Block393	0	255.454	0	0.0664327			313	2	43.777	Block1091	3.23	*	2.95556	3.14773		1391	8	10.67	Block4268
107	1	48.063	Block471	4.158	**	91.55	106.156		194	2	5.738	Block722	25.058	*******	83.6333	62.2563		70	1	8.355		0.78	362.009	1.8	-4.30558		70	1	8.355		0.02	255.339	0	-0.566905			314	2	43.798	Block1092	3.36	*	2.95556	3.15111		1438	8	17.163	Block4540
108	1	48.381	Block472	4.085	**	91.55	106.058		195	2	5.792	Block723	24.968	*******	83.6333	62.228		71	1	8.91	Block395	0.84	361.665	1.9	-4.37334		71	1	8.91	Block395	0.05	255.171	0.1	-0.876425			315	2	43.852	Block1094	3.914	**	2.95556	3.16621		1439	8	17.197	Block4543
109	1	48.451	Block475	5.037	**	93.1889	106.131		196	2	5.88	Block726	24.882	*******	83.6333	62.3061		72	1	9.054	Block396	0.92	361.003	2.1	-4.77726		72	1	9.054	Block396	0.04	255.223	0.1	-0.826696			316	2	43.883	Block1096	4.339	**	2.96	3.16643		1508	8	43.753	Block4758
119	1	50.129	Block494	3.17	*	88.25	105.682		197	2	5.921	Block728	24.842	*******	83.6333	62.3067		73	1	9.691	Block397	0.9	361.127	2.1	-4.7193		73	1	9.691	Block397	0.03	255.251	0.1	-0.772251			317	2	43.935	Block1097	4.339	**	2.96	3.16643		1509	8	43.84	Block4759
120	1	50.293	Block495	3.202	*	88.25	105.771		198	2	6.008	Block729	24.882	*******	83.6333	62.3061		74	1	9.929	Block398	0.82	361.845	1.9	-4.47408		74	1	9.929	Block398	0.03	255.267	0.1	-0.739143			318	2	44.007	Block1102	3.118	*	2.94286	3.15968		1683	10	5.223	Block5149
121	1	50.331	Block496	3.17	*	88.25	105.682		199	2	6.098	Block732	22.327	*******	83.05	62.5044		75	1	10.929		0.81	361.771	1.9	-4.39785		75	1	10.929		0.04	255.215	0.1	-0.815276			319	2	44.052	Block1104	3.081	*	2.94286	3.15868		1684	10	5.394	Block5150
122	1	50.518	Block497	3.202	*	88.25	105.771		200	2	6.309	Block742	22.063	*******	83.05	62.5633		76	1	11.929		0.8	361.792	1.9	-4.3148		76	1	11.929		0.05	255.161	0.1	-0.886319			320	2	44.21	Block1106	3.081	*	2.94286	3.15868		1685	10	5.457	Block5152
123	1	50.642	Block500	3.175	*	88.25	105.874		201	2	6.35	Block745	21.808	*******	83.05	62.9547		77	1	12.929		0.78	361.897	1.9	-4.22564		77	1	12.929		0.06	255.107	0.1	-0.951922			328	2	44.795	Block1136	3.707	*	2.95	3.16179		1875	11	4.563	Block5536
124	1	50.704	Block505	3.17	*	88.25	105.682		202	2	6.555	Block754	12.751	******	80.2636	62.9118		78	1	13.929		0.77	362.076	1.8	-4.13077		78	1	13.929		0.07	255.054	0.2	-1.01178			329	2	44.892	Block1137	3.707	*	2.95	3.16179		1876	11	4.602	Block5537
125	1	50.794	Block506	2.9	*	87.05	105.517		203	2	6.786	Block758	9.972	****	76.3429	63.0228		79	1	14.842	Block399	0.77	362.296	1.8	-4.03943		79	1	14.842	Block399	0.08	255.009	0.2	-1.06118			377	3	0.416	Block1455	3.352	*	3.036	3.15322		1899	11	7.425	Block5622
261	2	13.695	Block921	3.394	*	116.545	104.859		204	2	6.899	Block764	12.533	******	80.2636	63.0088		80	1	15.842		0.98	360.094	2.4	-4.4311		80	1	15.842		0.24	253.984	0.6	-1.82433			378	3	0.504	Block1457	4.787	**	3.02321	3.15531		1942	11	15.528	Block5847
286	2	39.477	Block1011	2.99	*	94.2667	105.623		205	2	6.919	Block765	10.398	****	78.3	63.0439		81	1	16.547	Block401	1.06	359.842	2.4	-4.36795		81	1	16.547	Block401	0.38	253.229	0.9	-2.18161			379	3	0.551	Block1459	4.74	**	3.01731	3.15531		1967	11	30.456	Block5891
287	2	39.828	Block1013	3.117	*	94.2667	105.766		206	2	6.961	Block766	10.58	****	78.3	62.948		82	1	17.547		1.05	359.734	2.4	-4.38154		82	1	17.547		0.37	253.243	0.9	-2.16846			380	3	0.625	Block1464	5.157	**	3.02241	3.15637		1974	11	32.422	Block5930
289	2	40.061	Block1020	3.119	*	95.65	105.636		207	2	7.056	Block768	7.068	***	76.39	63.3144		83	1	18.547		1.04	359.704	2.5	-4.38597		83	1	18.547		0.36	253.278	0.9	-2.15018			381	3	0.701	Block1465	5.157	**	3.02241	3.15637		2031	12	3.115	Block6134
326	2	44.698	Block1124	2.867	*	117.9	104.241		208	2	7.107	Block774	5.36	**	73.0615	63.6157		84	1	19.547		1.03	359.754	2.4	-4.38148		84	1	19.547		0.35	253.332	0.8	-2.12692			382	3	0.746	Block1468	3.744	*	3.01765	3.14671		2073	12	9.006	Block6218
332	2	45.256	Block1175	3.322	*	115.17	104.999		209	2	7.233	Block782	7.294	***	76.39	63.138		85	1	20.547		1.03	359.882	2.4	-4.36831		85	1	20.547		0.34	253.405	0.8	-2.09884			383	3	0.836	Block1469	3.744	*	3.01765	3.14671		2074	12	9.166	Block6221
333	2	45.282	Block1180	3.54	*	115.17	104.693		210	2	7.319	Block783	8.534	****	78.2	63.1216		86	1	21.547		1.02	360.087	2.4	-4.34664		86	1	21.547		0.33	253.495	0.8	-2.06604			384	3	0.859	Block1470	2.942	*	3.03125	3.14671		2075	12	9.214	Block6223
338	2	45.663	Block1225	2.981	*	114.744	104.27		211	2	7.376	Block786	5.792	**	78.3429	63.2568		87	1	22.03	Block402	1.01	360.212	2.3	-4.33319		87	1	22.03	Block402	0.32	253.544	0.7	-2.04856			422	3	6.743	Block1587	2.848	*	3.04138	3.15228		2076	12	9.263	Block6224
340	2	45.752	Block1228	2.739	*	114.744	104.769		212	2	7.522	Block789	5.748	**	78.3429	63.4595		88	1	23.03		0.96	360.577	2.2	-4.23397		88	1	23.03		0.29	253.727	0.7	-1.94525			423	3	6.777	Block1588	2.984	*	3.04138	3.15472		2084	12	10.502	Block6232
341	2	45.811	Block1238	2.917	*	114.744	104.344		213	2	7.569	Block790	5.803	**	78.3429	63.3081		89	1	24.03		0.89	361.175	2.1	-4.08345		89	1	24.03		0.25	253.957	0.6	-1.81468			424	3	6.799	Block1589	2.848	*	3.04138	3.15228		2087	12	10.859	Block6237
391	3	2.971	Block1512	4.349	**	115.595	104.732		214	2	7.601	Block793	5.804	**	78.3429	63.2459		90	1	24.532	Block403	0.85	361.572	2	-3.98347		90	1	24.532	Block403	0.23	254.085	0.5	-1.73869			431	3	7.526	Block1601	3.031	*	3.03571	3.15228		2092	12	11.463	Block6243
392	3	3.045	Block1515	2.964	*	113.61	105.114		215	2	7.635	Block795	3.309	*	71.9909	63.2459		91	1	25.532		0.63	363.121	1.5	-3.63563		91	1	25.532		0.35	253.062	0.9	-2.38782			432	3	7.564	Block1602	2.848	*	3.04138	3.15228		2097	12	12.674	Block6251
403	3	4.289	Block1555	2.927	*	112.927	104.466		216	2	7.731	Block799	5.792	**	78.3429	63.2568		92	1	26.532		0.4	365.147	1	-3.03865		92	1	26.532		0.45	252.523	1.1	-2.75284			480	3	17.181	Block1724	2.71	*	3.04667	3.15092		2196	13	10.666	Block6652
481	3	17.246	Block1727	3.051	*	112.656	104.877		221	2	8.2	Block821	4.99	**	76.3625	63.2186		93	1	27.205	Block405	0.26	366.563	0.6	-2.46423		93	1	27.205	Block405	0.48	252.638	1.1	-2.78565			519	3	32.944	Block1797	8.655	****	2.95217	3.16146		2200	13	11.55	Block6656
490	3	19.384	Block1747	3.251	*	112.941	104.082		222	2	8.253	Block827	4.937	**	76.3625	63.3719		94	1	27.924	Block410	0.29	366.303	0.7	-2.97328		94	1	27.924	Block410	0.27	253.852	0.6	-2.39822			520	3	33.173	Block1798	8.719	****	2.95217	3.16253		2221	13	17.012	Block6687
596	3	43.538	Block2005	4.077	**	98.05	106.568		225	2	8.369	Block833	3.547	*	73.2583	63.2306		95	1	28.263	Block411	0.13	367.626	0.3	-2.01139		95	1	28.263	Block411	0.15	254.547	0.4	-1.79444			521	3	33.473	Block1799	9.136	****	2.95417	3.16362		2222	13	17.121	Block6688
597	3	43.565	Block2006	4.059	**	97.9048	106.568		226	2	8.423	Block836	5.008	**	76.3625	63.2306		96	1	28.339	Block412	0.29	366.303	0.7	-2.97328		96	1	28.339	Block412	0.27	253.852	0.6	-2.39822			522	3	33.544	Block1800	9.067	****	2.95417	3.16253		2223	13	17.167	Block6689
672	4	8.807	Block2204	3.345	*	94.6857	106.106		227	2	8.53	Block837	4.943	**	76.3625	63.3866		97	1	28.568	Block413	0.13	367.626	0.3	-2.01139		97	1	28.568	Block413	0.15	254.547	0.4	-1.79444			523	3	33.573	Block1801	9.136	****	2.95417	3.16362		2244	13	21.744	Block6726
673	4	8.848	Block2206	3.345	*	94.6857	106.106		228	2	8.567	Block838	5.008	**	76.3625	63.2306		98	1	28.787	Block414	0.29	366.303	0.7	-2.97328		98	1	28.787	Block414	0.27	253.852	0.6	-2.39822			524	3	33.676	Block1802	8.784	****	2.95217	3.16362		2246	13	21.864	Block6739
680	4	10.226	Block2225	2.801	*	99.32	106.56		229	2	8.604	Block839	5.072	**	76.3625	63.1425		99	1	29.787		0.29	366.289	0.7	-2.97585		99	1	29.787		0.27	253.844	0.6	-2.39976			525	3	33.912	Block1803	6.96	***	2.975	3.16135		2247	13	21.942	Block6742
683	4	10.627	Block2229	3.147	*	98.1538	106.411		230	2	8.635	Block840	4.99	**	76.3625	63.2186		100	1	30.609	Block416	0.29	366.303	0.7	-2.97328		100	1	30.609	Block416	0.27	253.852	0.6	-2.39822			526	3	34.008	Block1805	6.899	***	2.975	3.16027		2248	13	22.002	Block6745
684	4	10.752	Block2230	3.147	*	98.1538	106.411		231	2	8.674	Block843	8.111	****	78.925	63.1096		101	1	31.609		0.2	366.945	0.5	-2.5439		101	1	31.609		0.21	254.197	0.5	-2.11383			527	3	34.093	Block1806	6.899	***	2.975	3.16027		2249	13	22.072	Block6747
685	4	10.948	Block2232	2.992	*	98.4042	106.411		232	2	8.735	Block846	7.726	***	78.925	63.5352		102	1	32.449	Block417	0.13	367.626	0.3	-2.01139		102	1	32.449	Block417	0.15	254.547	0.4	-1.79444			528	3	34.3	Block1807	6.84	***	2.975	3.1592		2250	13	22.185	Block6752
750	4	46.921	Block2420	2.744	*	97.6696	106.382		233	2	8.77	Block848	7.9	****	78.925	63.5086		103	1	32.898	Block418	0.29	366.303	0.7	-2.97328		103	1	32.898	Block418	0.27	253.852	0.6	-2.39822			529	3	34.323	Block1808	6.899	***	2.975	3.16027		2251	13	22.278	Block6754
751	4	47.047	Block2425	3.831	*	97.176	106.503		234	2	8.809	Block849	7.9	****	78.925	63.5086		104	1	33.725	Block423	1.64	355.016	3.7	-6.26553		104	1	33.725	Block423	1.5	246.722	3.4	-4.99328			530	3	34.475	Block1811	4.131	**	2.98077	3.14615		2252	13	22.349	Block6755
752	4	47.144	Block2428	4.245	**	97.176	106.824		238	2	9.14	Block859	4.522	**	72.8786	63.5086		105	1	34.725		1.64	354.589	3.8	-6.29694		105	1	34.725		1.55	246.19	3.6	-5.09499			531	3	34.572	Block1816	2.835	*	2.995	3.14226		2259	13	23.537	Block6769
753	4	47.327	Block2433	3.952	**	99.2103	106.753		239	2	9.178	Block860	4.537	**	72.5133	63.5086		106	1	35.725		1.64	354.415	3.9	-6.29837		106	1	35.725		1.58	245.831	3.8	-5.16457			532	3	34.602	Block1817	2.835	*	2.995	3.14226		2278	13	26.94	Block6812
754	4	47.362	Block2434	4.181	**	99.2103	106.911		243	2	9.64	Block878	7.029	***	79.2429	63.0459		107	1	36.725		1.62	354.509	3.9	-6.26768		107	1	36.725		1.61	245.659	3.8	-5.20169			533	3	34.688	Block1818	3.177	*	2.99545	3.14313		2286	13	27.715	Block6835
755	4	47.429	Block2436	4.083	**	99.0158	106.753		244	2	9.698	Block879	9.432	****	84.1	63.0459		108	1	37.725		1.61	354.874	3.8	-6.20353		108	1	37.725		1.63	245.684	3.8	-5.20667			534	3	35.042	Block1828	5.958	**	2.98261	3.1592		2287	13	27.798	Block6837
756	4	47.589	Block2437	2.741	*	97.516	106.387		245	2	9.792	Block883	9.266	****	84.1	63.4023		109	1	38.725	Block426	1.58	355.5	3.6	-6.10561		109	1	38.725	Block426	1.65	245.906	3.7	-5.18003			535	3	35.108	Block1830	5.987	**	2.97143	3.1592		2288	13	27.847	Block6839
758	4	48.674	Block2448	2.714	*	98.8231	106.325		257	2	12.359	Block916	3.013	*	73.2583	63.6253		110	1	39.725		1.6	354.429	3.9	-6.4286		110	1	39.725		1.97	242.158	5.2	-6.25286			536	3	35.229	Block1832	5.639	**	2.97	3.1592		2290	13	27.943	Block6845
771	4	51.595	Block2486	3.647	*	111.639	104.507		258	2	12.411	Block918	2.986	*	73.2583	63.663		111	1	40.725		1.57	354.25	3.9	-6.56182		111	1	40.725		2.11	241.208	5.6	-6.55816			537	3	35.273	Block1835	5.958	**	2.98261	3.1592		2291	13	28.064	Block6848
800	5	5.147	Block2536	3.228	*	98.3364	106.373		261	2	13.695	Block921	2.996	*	73.9364	63.6753		112	1	41.725		1.49	355.053	3.7	-6.49847		112	1	41.725		2.14	241.601	5.4	-6.5663			538	3	35.42	Block1846	5.918	**	2.95294	3.15923		2300	13	28.549	Block6870
801	5	5.177	Block2537	3.228	*	98.3364	106.373		284	2	39.004	Block1008	3.84	*	44.75	64.3811		113	1	42.725		1.36	356.969	3.2	-6.19306		113	1	42.725		2.06	243.164	4.8	-6.32797			539	3	35.497	Block1849	6.296	**	2.98333	3.1592		2301	13	28.688	Block6876
863	5	29.298	Block2726	4.032	**	96.8538	105.869		285	2	39.293	Block1010	3.626	*	50.5	64.4649		114	1	42.986	Block429	1.32	357.659	3	-6.064		114	1	42.986	Block429	2.02	243.797	4.6	-6.21226			540	3	35.55	Block1850	5.883	**	2.992	3.15893		2306	13	29.031	Block6896
864	5	29.532	Block2727	4.036	**	96.8538	105.885		325	2	44.57	Block1122	3.638	*	78.2556	63.48		115	1	43.007	Block431	1.23	358.42	2.8	-5.91576		115	1	43.007	Block431	1.94	244.229	4.4	-6.16184			541	3	35.717	Block1853	5.107	**	2.9913	3.15682		2307	13	29.116	Block6897
865	5	29.61	Block2728	3.946	**	96.8538	105.751		326	2	44.698	Block1124	3.722	*	78.2556	63.2763		116	1	43.074	Block434	1.4	357.004	3.2	-6.03524		116	1	43.074	Block434	2.62	240.434	5.9	-6.81987			560	3	37.863	Block1918	3.536	*	3.02353	3.16057		2308	13	29.176	Block6903
866	5	29.69	Block2730	3.499	*	97.8533	105.751		382	3	0.746	Block1468	5.312	**	70.3227	63.2903		117	1	43.147	Block438	1.27	358.071	2.9	-5.59927		117	1	43.147	Block438	2.45	241.376	5.5	-6.42372			590	3	42.225	Block1981	2.92	*	3.29583	3.12179		2309	13	29.22	Block6909
868	5	29.921	Block2735	3.946	**	96.8538	105.751		383	3	0.836	Block1469	4.215	**	69.4143	63.2903		118	1	43.213	Block440	1.2	358.668	2.7	-5.54496		118	1	43.213	Block440	2.38	241.764	5.4	-6.45617			660	4	6.674	Block2173	3.633	*	3.02407	3.15363		2317	13	29.764	Block6953
869	5	29.964	Block2736	3.855	**	96.8538	105.67		384	3	0.859	Block1470	3.141	*	68.115	63.2903		119	1	43.462	Block441	1.3	357.877	3	-5.78218		119	1	43.462	Block441	2.51	241.018	5.7	-6.65757			661	4	6.957	Block2175	2.966	*	3.026	3.15155		2323	13	30.165	Block6982
870	5	30.046	Block2738	4.032	**	96.8538	105.869		385	3	1.006	Block1471	2.734	*	68.0263	63.4379		120	1	43.55	Block442	1.3	357.877	3	-5.78218		120	1	43.55	Block442	2.51	241.018	5.7	-6.65757			662	4	7.022	Block2176	2.966	*	3.026	3.15155		2324	13	30.191	Block6985
871	5	30.449	Block2739	3.809	*	96.7917	105.869		386	3	1.562	Block1472	3.647	*	68.9556	63.3697		121	1	43.59	Block444	1.2	358.697	2.7	-5.35466		121	1	43.59	Block444	2.5	241.087	5.6	-6.39586			663	4	7.087	Block2177	3.025	*	3.026	3.15259		2325	13	30.251	Block6988
872	5	31.715	Block2740	7.724	***	93.4789	106.579		462	3	12.504	Block1687	2.747	*	58.416	65.0971		122	1	43.806	Block445	1.2	358.697	2.7	-5.35466		122	1	43.806	Block445	2.5	241.087	5.6	-6.39586			665	4	7.254	Block2183	3.494	*	2.99286	3.15119		2326	13	30.316	Block6989
879	5	32.37	Block2782	5.044	**	94.6529	106.329		552	3	36.906	Block1878	4.076	**	71.0059	63.6842		123	1	43.854	Block446	1.3	357.877	3	-5.78218		123	1	43.854	Block446	2.51	241.018	5.7	-6.65757			667	4	7.511	Block2188	2.855	*	3.0175	3.15019		2327	13	30.442	Block6996
880	5	32.613	Block2784	4.76	**	94.1267	106.291		553	3	37.277	Block1881	6.407	**	71.8429	63.0486		124	1	43.895	Block447	1.3	357.877	3	-5.78218		124	1	43.895	Block447	2.51	241.018	5.7	-6.65757			693	4	12.141	Block2259	2.926	*	3.22867	3.1231		2330	13	30.553	Block7007
881	5	32.764	Block2786	4.193	**	95.6824	106.233		554	3	37.355	Block1888	5.577	**	71.8429	63.7755		125	1	43.972	Block453	1.05	359.95	2.4	-4.82515		125	1	43.972	Block453	2.27	242.399	5.1	-5.87154			696	4	12.368	Block2265	2.926	*	3.22867	3.1231		2332	13	30.668	Block7016
882	5	32.909	Block2787	3.006	*	96.5563	106.099		561	3	38.221	Block1922	2.867	*	70.0706	63.563		126	1	44.074	Block454	1.27	358.073	2.9	-5.42667		126	1	44.074	Block454	2.41	241.611	5.4	-6.17427			703	4	14.204	Block2287	2.926	*	3.22867	3.1231		2333	13	30.715	Block7019
887	5	33.451	Block2799	3.162	*	95.7143	106.155		562	3	38.297	Block1923	2.8	*	70.0706	63.6533		127	1	44.372	Block456	1.12	359.373	2.5	-5.38161		127	1	44.372	Block456	2.14	243.132	4.8	-6.16361			704	4	15.709	Block2289	3.031	*	3.22867	3.12204		2334	13	30.741	Block7020
888	5	33.507	Block2801	2.896	*	96.3438	106.299		563	3	38.368	Block1924	2.867	*	70.0706	63.563		128	1	45.111	Block460	0.77	362.264	1.8	-5.7903		128	1	45.111	Block460	1.65	245.899	3.7	-7.01899			707	4	16.1	Block2304	2.926	*	3.22867	3.1231		2335	13	30.777	Block7021
889	5	33.683	Block2803	3.421	*	96.0294	106.201		569	3	39.089	Block1934	3.394	*	71.4533	63.6445		129	1	45.437	Block463	0.6	363.681	1.4	-6.01406		129	1	45.437	Block463	0.93	249.991	2.1	-6.23312			712	4	16.558	Block2326	2.926	*	3.22867	3.1231		2336	13	30.951	Block7023
890	5	33.755	Block2804	3.647	*	96.1333	106.246		570	3	39.283	Block1936	3.317	*	71.4533	63.7348		130	1	45.822	Block466	0.72	362.672	1.7	-6.3599		130	1	45.822	Block466	1.02	249.523	2.3	-6.27426			713	4	16.819	Block2327	2.842	*	3.22867	3.12643		2337	13	31.103	Block7026
891	5	33.831	Block2807	3.875	**	96.1333	106.645		571	3	39.438	Block1937	3.394	*	71.4533	63.6445		131	1	46.818	Block468	0.93	360.938	2.1	-6.37499		131	1	46.818	Block468	1.12	248.908	2.6	-5.82941			714	4	16.883	Block2328	2.926	*	3.22867	3.1231		2338	13	31.166	Block7027
895	5	34.202	Block2815	2.957	*	99.3074	106.404		572	3	39.516	Block1939	3.394	*	71.4533	63.6445		132	1	47.818		1.2	358.402	2.8	-8.43468		132	1	47.818		1.41	247.001	3.3	-7.62714			717	4	17.899	Block2338	2.926	*	3.22867	3.1231		2339	13	31.222	Block7031
900	5	34.442	Block2824	2.749	*	95.4538	106.431		573	3	39.629	Block1943	3.394	*	71.4533	63.6445		133	1	48.063	Block471	1.27	358.076	2.9	-8.92455		133	1	48.063	Block471	1.46	246.964	3.3	-7.95371			718	4	18.201	Block2340	3.566	*	3.23937	3.1234		2340	13	31.619	Block7034
909	5	35.184	Block2834	3.948	**	93.9667	106.234		574	3	39.661	Block1945	3.309	*	71.4533	63.7144		134	1	48.381	Block472	1.12	359.308	2.6	-8.53036		134	1	48.381	Block472	1.31	247.816	3	-7.66636			719	4	18.452	Block2345	5.001	**	2.96176	3.15369		2362	13	36.738	Block7081
910	5	35.255	Block2840	5.642	**	92.8067	106.694		576	3	40.061	Block1947	3.386	*	71.4533	63.6238		135	1	48.451	Block475	1.12	359.363	2.6	-7.21127		135	1	48.451	Block475	1.13	248.841	2.6	-6.04793			720	4	18.56	Block2350	3.566	*	3.23937	3.1234		2364	13	37.309	Block7083
911	5	35.298	Block2842	5.912	**	92.8067	107.011		577	3	40.223	Block1948	3.394	*	71.4533	63.6445		136	1	48.742	Block476	0.41	365.315	0.9	-7.08806		136	1	48.742	Block476	0.19	254.308	0.4	-4.08571			721	4	40.236	Block2352	3.46	*	3.23706	3.12468		2365	13	37.377	Block7085
912	5	35.336	Block2844	5.642	**	92.8067	106.694		578	3	40.467	Block1949	5.338	**	73.5143	63.5295		137	1	48.833	Block477	0.45	364.967	1	-7.70138		137	1	48.833	Block477	0.23	254.078	0.5	-4.63688			722	4	41.352	Block2353	2.797	*	3.22389	3.12548		2520	14	45.765	Block7572
913	5	35.388	Block2846	5.365	**	92.8067	106.396		579	3	40.528	Block1950	6.11	**	74.5923	63.5295		138	1	49.178	Block478	0.45	364.967	1	-7.70138		138	1	49.178	Block478	0.23	254.078	0.5	-4.63688			724	4	41.606	Block2355	2.797	*	3.22389	3.12548		2576	15	4.501	Block7688
914	5	35.452	Block2850	5.729	**	92.8067	106.718		580	3	40.6	Block1951	6.733	***	75.6333	63.5217		139	1	49.288	Block479	0.58	363.892	1.3	-7.64691		139	1	49.288	Block479	0.35	253.408	0.8	-4.95597			726	4	41.829	Block2357	2.797	*	3.22389	3.12548		2579	15	4.862	Block7698
915	5	35.484	Block2851	4.768	**	94.1625	106.718		581	3	40.782	Block1952	7.958	****	75.7846	63.4448		140	1	49.337	Block482	0.89	361.264	2	-5.31926		140	1	49.337	Block482	1.09	249.118	2.5	-4.88876			727	4	43.631	Block2358	2.797	*	3.22389	3.12548		2580	15	5.06	Block7700
916	5	35.566	Block2852	4.609	**	94.1625	106.512		582	3	41.256	Block1954	6.044	**	73.58	63.4912		141	1	49.551	Block489	0.02	368.611	0	-1.18784		141	1	49.551	Block489	0.06	255.107	0.1	-1.77092			728	4	44.311	Block2359	3.476	*	3.23316	3.1237		2581	15	5.199	Block7702
917	5	35.659	Block2853	4.475	**	94.1625	106.401		583	3	41.499	Block1955	4.788	**	73.1643	63.5786		142	1	49.872	Block490	0	368.751	0	-0.403259		142	1	49.872	Block490	0.03	255.307	0.1	-1.17872			729	4	44.351	Block2360	3.476	*	3.23316	3.1237		2582	15	5.238	Block7703
918	5	35.689	Block2858	4.483	**	94.1625	106.538		584	3	41.573	Block1958	4.037	**	73.1643	64.1895		143	1	49.944	Block491	0.03	368.481	0.1	-1.57476		143	1	49.944	Block491	0.11	254.831	0.2	-2.32349			730	4	44.406	Block2361	2.901	*	3.22389	3.1237		2583	15	5.355	Block7704
919	5	35.756	Block2859	4.339	**	94.1625	106.344		590	3	42.225	Block1981	3.766	*	72.2357	63.6016		144	1	50.008	Block493	0.22	366.892	0.5	-4.37577		144	1	50.008	Block493	0.21	254.24	0.5	-3.52263			731	4	44.442	Block2363	3.901	**	3.2365	3.12124		2584	15	5.538	Block7706
920	5	35.895	Block2862	4.751	**	94.9381	106.601		598	3	43.631	Block2013	3.261	*	74.1909	64.2564		145	1	50.129	Block494	0.71	362.783	1.6	-8.71603		145	1	50.129	Block494	0.44	252.884	1	-5.71397			732	4	44.466	Block2364	4.518	**	3.24429	3.12124		2585	15	5.576	Block7707
921	5	36.112	Block2867	5.887	**	94.6409	106.718		599	3	43.66	Block2015	3.688	*	74.1909	63.4632		146	1	50.293	Block495	0.85	361.624	1.9	-9.25603		146	1	50.293	Block495	0.68	251.441	1.6	-6.93873			733	4	44.514	Block2366	2.949	*	3.22263	3.1237		2586	15	5.653	Block7708
922	5	36.267	Block2870	5.715	**	94.6409	106.651		600	3	43.687	Block2016	3.696	*	74.1909	63.4066		147	1	50.331	Block496	0.71	362.783	1.6	-8.71603		147	1	50.331	Block496	0.44	252.884	1	-5.71397			734	4	44.603	Block2367	3.134	*	3.22263	3.12124		2587	15	5.712	Block7709
923	5	36.318	Block2871	5.366	**	93.8235	106.394		601	3	43.843	Block2017	3.617	*	74.1909	63.5628		148	1	50.518	Block497	0.85	361.624	1.9	-9.25603		148	1	50.518	Block497	0.68	251.441	1.6	-6.93873			735	4	44.674	Block2368	2.949	*	3.22263	3.1237		2588	15	6.243	Block7712
924	5	36.436	Block2873	5.318	**	92.8067	106.342		602	3	43.885	Block2021	3.378	*	74.1909	63.8547		149	1	50.642	Block500	0.87	361.449	2	-8.5015		149	1	50.642	Block500	0.88	250.29	2	-7.14252			736	4	44.758	Block2369	3.901	**	3.2365	3.12124		2589	15	6.688	Block7713
925	5	36.584	Block2874	3.627	*	94.85	106.236		603	3	43.964	Block2022	4.66	**	76.35	63.9733		150	1	50.704	Block505	0.71	362.783	1.6	-8.71603		150	1	50.704	Block505	0.44	252.884	1	-5.71397			737	4	45.392	Block2370	2.949	*	3.22263	3.1237		2592	15	7.416	Block7722
931	5	38.688	Block2887	2.797	*	101.227	106.352		604	3	44.028	Block2027	5.043	**	76.35	63.4463		151	1	50.794	Block506	0.4	365.375	0.9	-9.23363		151	1	50.794	Block506	0.26	253.945	0.6	-6.16104			738	4	45.443	Block2373	2.79	*	3.21737	3.12435		2593	15	7.732	Block7723
933	5	38.891	Block2889	3.328	*	100.569	106.234		605	3	44.202	Block2030	4.887	**	76.35	63.7649		152	1	50.827	Block508	0.19	367.189	0.4	-7.2854		152	1	50.827	Block508	0.16	254.521	0.4	-5.6073			772	4	52.123	Block2487	8.729	****	3.00278	3.16942		2617	15	13.117	Block7766
934	5	39.356	Block2891	2.735	*	100.925	106.143		606	3	44.299	Block2032	4.805	**	76.35	63.8746		153	1	50.913	Block512	0.17	367.357	0.4	8.46346		153	1	50.913	Block512	0	255.449	0	-0.610513			773	5	0.021	Block2488	2.851	*	2.97308	3.14894		2618	15	13.166	Block7767
935	5	39.424	Block2892	3.479	*	100.493	106.249		607	3	44.334	Block2033	4.887	**	76.35	63.7065		154	1	51.038	Block514						154	1	51.038	Block514							779	5	2.184	Block2506	3.694	*	2.95	3.14386		2619	15	13.313	Block7768
1039	6	10.205	Block3119	4.07	**	88.72	105.76		608	3	44.362	Block2037	5.043	**	76.35	63.4463		155	1	51.486	Block515	0.67	363.123	1.5	-33.6005		155	1	51.486	Block515	0.72	251.253	1.6	-28.9939			897	5	34.292	Block2817	3.069	*	2.99923	3.15442		2620	15	13.345	Block7769
1040	6	10.82	Block3120	3.912	**	86.6	105.716		618	3	45.029	Block2065	5.196	**	76.35	63.3907		156	1	51.588	Block517	0.21	366.957	0.5	-7.86891		156	1	51.588	Block517	0.64	251.718	1.5	-11.3058			898	5	34.315	Block2818	2.756	*	2.9992	3.15338		2621	15	13.387	Block7770
1041	6	10.946	Block3125	3.925	**	86.6	105.814		619	3	45.095	Block2069	5.07	**	76.35	63.5669		157	1	51.702	Block518	0.17	367.293	0.4	-6.59211		157	1	51.702	Block518	0.5	252.546	1.1	-9.25967			899	5	34.404	Block2819	4.037	**	2.97417	3.15638		2802	15	50.743	Block8284
1042	6	11.056	Block3128	3.912	**	86.6	105.716		620	3	45.125	Block2072	5.006	**	76.35	63.5903		158	1	51.748	Block522	0.2	367.071	0.5	-3.73949		158	1	51.748	Block522	0.58	252.029	1.3	-5.31359			920	5	35.895	Block2862	4.151	**	2.95684	3.15556		2828	16	3.042	Block8380
1084	6	16.849	Block3246	3.649	*	97.0462	106.053		621	3	45.193	Block2074	5.085	**	76.35	63.4441		159	1	51.814	Block525						159	1	51.814	Block525							1149	6	50.266	Block3386	4.813	**	3.02742	3.15715		2829	16	3.165	Block8381
1085	6	16.929	Block3247	3.507	*	97.0462	105.869		622	3	45.245	Block2077	5.234	**	76.35	63.3317		160	1	52.127	Block526	0.24	366.761	0.5	-10.0162		160	1	52.127	Block526	0.37	253.302	0.8	10.378			1150	6	50.328	Block3388	4.813	**	3.02742	3.15715		2830	16	3.262	Block8386
1086	6	17.147	Block3250	3.835	*	97.0462	106.199		623	3	45.415	Block2079	5.21	**	76.35	63.3632		161	1	53.127		0.08	368.056	0.2	-4.91652		161	1	53.127		0.13	254.684	0.3	5.12168			1156	6	50.592	Block3401	4.306	**	3.03387	3.15576		2833	16	3.725	Block8389
1087	6	17.21	Block3260	4.343	**	99.2185	106.199		624	3	45.506	Block2080	11.847	*****	77.15	62.6833		162	1	53.161	Block528	0.08	368.111	0.2	-4.70076		162	1	53.161	Block528	0.12	254.751	0.3	4.86638			1159	6	50.933	Block3411	2.709	*	2.98571	3.14487		2834	16	3.903	Block8390
1088	6	17.311	Block3264	3.835	*	97.0462	106.199		651	4	4.9	Block2130	4.184	**	71.95	63.6027		163	1	53.194	Block530	0.24	366.761	0.5	-10.0162		163	1	53.194	Block530	0.37	253.302	0.8	10.378			1160	6	51.132	Block3412	2.777	*	2.98571	3.14708		2835	16	3.941	Block8391
1089	6	17.388	Block3265	3.503	*	97.7286	106.199		680	4	10.226	Block2225	3.194	*	58.98	65.1904		164	1	54.194		0.2	366.75	0.5	-8.79534		164	1	54.194		0.05	254.79	0.3	5.51259			1176	7	3.9	Block3455	2.85	*	2.83571	3.14988		2836	16	4.033	Block8392
1090	6	17.423	Block3266	4.799	**	96.0067	106.199		681	4	10.398	Block2226	3.036	*	58.98	65.0551		165	1	55.194		0.13	367.589	0.3	-7.43778		165	1	55.194		0.09	254.853	0.2	-5.4971			1177	7	3.936	Block3457	4.28	**	2.76667	3.14659		2837	16	4.06	Block8393
1091	6	17.488	Block3269	3.835	*	97.0462	106.199		683	4	10.627	Block2229	3.067	*	58.5462	65.0551		166	1	55.305	Block532	0.12	367.731	0.3	-7.20202		166	1	55.305	Block532	0.11	254.782	0.3	-5.80328			1178	7	4.024	Block3458	4.246	**	2.76667	3.14722		2838	16	4.154	Block8394
1092	6	17.598	Block3270	2.864	*	97.775	106.199		684	4	10.752	Block2230	3.067	*	58.5462	65.0551		167	1	55.506	Block533	0.12	367.731	0.3	-14.404		167	1	55.506	Block533	0.11	254.782	0.3	-11.6066			1183	7	4.876	Block3465	4.971	**	2.81875	3.14928		2839	16	4.241	Block8395
1094	6	18.5	Block3273	4.244	**	95.3909	105.966		710	4	16.408	Block2317	2.794	*	59.2552	64.9421		168	1	55.583	Block535	0.24	366.692	0.6	6.82208		168	1	55.583	Block535	0.23	254.093	0.5	5.52814			1184	7	5.073	Block3467	5.334	**	2.83889	3.15109		2840	16	4.324	Block8396
1095	6	18.731	Block3274	3.844	**	96.5385	106		751	4	47.047	Block2425	2.744	*	59.04	64.8822		169	1	55.786	Block538	0.12	367.731	0.3	-14.404		169	1	55.786	Block538	0.11	254.782	0.3	-11.6066			1185	7	5.107	Block3468	5.052	**	2.81875	3.15109		2841	16	4.47	Block8397
1096	6	18.9	Block3277	4.857	**	95.95	106		752	4	47.144	Block2428	3.245	*	59.04	65.4713		170	1	55.879	Block539	0.12	367.731	0.3	-7.20202		170	1	55.879	Block539	0.11	254.782	0.3	-5.80328			1187	7	5.416	Block3473	4.982	**	2.81875	3.14713		2842	16	4.491	Block8398
1097	6	19.002	Block3278	3.844	**	96.5385	106		753	4	47.327	Block2433	4.786	**	58.7205	65.4164		171	1	56.152	Block540	0.03	368.499	0.1	-3.28874		171	1	56.152	Block540	0.03	255.27	0.1	-2.73367			1188	7	5.867	Block3474	4.716	**	2.79286	3.14713		2843	16	4.751	Block8399
1098	6	19.033	Block3279	4.857	**	95.95	106		754	4	47.362	Block2434	5.028	**	58.7205	65.5608		172	1	56.311	Block541	0.01	368.703	0	1.48209		172	1	56.311	Block541	0.01	255.412	0	1.21749			1189	7	5.996	Block3475	5.832	**	2.725	3.14745		2844	16	4.919	Block8402
1099	6	19.144	Block3280	3.844	**	96.5385	106		755	4	47.429	Block2436	5.021	**	58.4921	65.4164		173	2	0.011	Block542	0.52	364.377	1.2	-4.42623		173	2	0.011	Block542	0	255.456	0	-0.00345877			1190	7	6.162	Block3476	5.832	**	2.725	3.14745		2845	16	5.028	Block8403
1100	6	20.307	Block3281	4.857	**	95.95	106		771	4	51.595	Block2486	2.709	*	67.813	63.6693		174	2	0.139	Block543	0.36	365.687	0.8	-3.73904		174	2	0.139	Block543	0.02	255.362	0	0.654228			1191	7	6.242	Block3482	6.063	**	2.725	3.15417		2846	16	5.166	Block8404
1101	6	20.343	Block3282	3.844	**	96.5385	106		872	5	31.715	Block2740	3.669	*	57.8158	64.8736		175	2	0.168	Block544	0.42	365.185	1	-3.99801		175	2	0.168	Block544	0.01	255.423	0	0.384407			1192	7	6.296	Block3489	7.802	***	2.73571	3.16084		2847	16	5.365	Block8405
1102	6	20.783	Block3283	4.857	**	95.95	106		879	5	32.37	Block2782	4.157	**	57.0294	64.8132		176	2	0.212	Block545	0.12	367.723	0.3	-2.00962		176	2	0.212	Block545	0.1	254.866	0.2	1.51043			1193	7	6.464	Block3491	4.458	**	2.88333	3.16084		2848	16	5.769	Block8406
1103	6	20.85	Block3284	3.844	**	96.5385	106		880	5	32.613	Block2784	2.999	*	57.5867	64.7377		177	2	0.326	Block552	0.27	366.433	0.6	-2.84595		177	2	0.326	Block552	0	255.441	0	-0.224584			1194	7	6.512	Block3492	4.627	**	2.88333	3.16675		2849	16	5.796	Block8407
1104	6	21.136	Block3285	3.153	*	97.7643	106		883	5	33.141	Block2792	2.764	*	59.5931	65.0811		178	2	0.425	Block562	0.11	367.814	0.3	-1.87151		178	2	0.425	Block562	0.1	254.893	0.2	1.43813			1195	7	6.56	Block3497	7.654	***	2.73571	3.15847		2850	16	5.843	Block8409
1105	6	21.219	Block3286	3.844	**	96.5385	106		884	5	33.28	Block2793	2.932	*	59.5931	65.2149		179	2	0.604	Block563	0.11	367.815	0.3	2.00152		179	2	0.604	Block563	0.64	251.716	1.5	3.96516			1196	7	6.602	Block3502	7.228	***	2.73571	3.15168		2851	16	5.931	Block8410
1106	6	21.411	Block3287	4.857	**	95.95	106		1044	6	11.27	Block3130	7.143	***	80.6571	63.5464		180	2	0.888	Block574	0.25	366.635	0.6	-1.99368		180	2	0.888	Block574	1.01	249.58	2.3	3.30936			1197	7	6.673	Block3503	7.408	***	2.76875	3.15168		2852	16	5.952	Block8411
1107	6	21.523	Block3288	3.844	**	96.5385	106		1045	6	11.931	Block3131	7.163	***	80.6571	63.5079		181	2	0.973	Block579	0.22	366.875	0.5	-2.04837		181	2	0.973	Block579	1.48	246.85	3.4	4.36694			1198	7	6.862	Block3504	5.377	**	2.855	3.15109		2853	16	6.052	Block8412
1108	6	22.122	Block3289	4.857	**	95.95	106		1046	6	11.971	Block3132	7.143	***	80.6571	63.5464		182	2	1.024	Block582	0.14	367.595	0.3	-1.64803		182	2	1.024	Block582	2.03	243.711	4.6	5.21519			1199	7	6.951	Block3505	5.291	**	2.855	3.14713		2854	16	6.563	Block8413
1109	6	22.189	Block3290	3.844	**	96.5385	106		1047	6	12.089	Block3133	5.711	**	81.0667	63.6223		183	2	1.11	Block583	0.16	367.372	0.4	-1.79311		183	2	1.11	Block583	1.87	244.639	4.2	4.9911			1200	7	7.002	Block3506	2.85	*	2.94091	3.14713		2855	16	6.66	Block8414
1110	6	24.177	Block3291	3.153	*	97.7643	106		1048	6	12.141	Block3134	5.666	**	81.0667	63.7526		184	2	1.45	Block584	0.04	368.419	0.1	-0.868081		184	2	1.45	Block584	2.29	242.274	5.2	5.33274			1201	7	7.044	Block3508	3.13	*	2.92273	3.14835		2856	16	7.258	Block8416
1111	6	24.302	Block3292	3.844	**	96.5385	106		1049	6	12.229	Block3135	4.025	**	76.65	63.7563		185	2	1.508	Block585	0.06	368.277	0.1	-1.01617		185	2	1.508	Block585	2.07	243.518	4.7	5.00933			1202	7	7.086	Block3509	3.047	*	2.92273	3.14436		2857	16	7.343	Block8418
1113	6	25.463	Block3310	3.844	**	96.5385	106		1051	6	12.494	Block3149	3.986	**	76.65	63.7537		186	2	1.733	Block586	0	368.756	0	0.153139		186	2	1.733	Block586	2.98	238.408	6.7	5.89856			1203	7	7.136	Block3512	3.047	*	2.92273	3.14436		2858	16	7.737	Block8419
1114	6	28.296	Block3311	4.857	**	95.95	106		1054	6	12.625	Block3162	4.084	**	76.65	63.6246		187	2	1.858	Block588	0.02	368.571	0.1	-0.652961		187	2	1.858	Block588	2.52	240.963	5.7	5.60515			1204	7	7.213	Block3519	3.071	*	2.92273	3.14525		2859	16	7.913	Block8420
1115	6	28.333	Block3312	4.076	**	97.1333	106		1087	6	17.21	Block3260	3.235	*	59.4074	64.9065		188	2	2.185	Block589	0	368.741	0	-0.227009		188	2	2.185	Block589	2.18	242.874	4.9	4.92901			1205	7	7.245	Block3520	3.188	*	2.92273	3.14863		2860	16	8.299	Block8421
1116	6	28.437	Block3314	3.844	**	96.5385	106		1094	6	18.5	Block3273	2.756	*	56.8455	64.4876		189	2	2.349	Block590	0	368.764	0	-0.0882598		189	2	2.349	Block590	2.29	242.248	5.2	5.05933			1206	7	7.303	Block3524	3.13	*	2.92273	3.14835		2861	16	8.347	Block8422
1117	6	28.744	Block3315	4.857	**	95.95	106		1119	6	38.978	Block3320	6.385	**	55.8944	64.8006		190	2	2.447	Block591	0	368.764	0	-0.0882598		190	2	2.447	Block591	2.29	242.248	5.2	5.05933			1207	7	7.333	Block3525	3.047	*	2.92273	3.14436		2862	16	9.21	Block8423
1118	6	28.915	Block3316	3.844	**	96.5385	106		1120	6	39.358	Block3321	7.485	***	55.5429	64.9954		191	2	2.818	Block592	0.02	368.607	0	0.550896		191	2	2.818	Block592	2.68	240.119	6	5.38065			1209	7	7.468	Block3530	3.13	*	2.92273	3.14835		2863	16	9.266	Block8424
1140	6	49.442	Block3365	3.768	*	112.873	104.198		1121	6	41.543	Block3322	5.898	**	56.3286	64.9011		192	2	2.909	Block593	0.14	367.58	0.3	1.49761		192	2	2.909	Block593	3.34	236.451	7.4	5.98966			1210	7	7.6	Block3531	3.047	*	2.92273	3.14436		2864	16	10.885	Block8425
1141	6	49.538	Block3366	6.593	**	114.145	103.828		1122	6	42.096	Block3324	6.672	***	56.1773	65.052		193	2	3.015	Block595	0.14	367.586	0.3	1.49139		193	2	3.015	Block595	3.17	237.412	7.1	5.82652			1211	7	7.728	Block3554	4.98	**	2.975	3.1632		2865	16	11.014	Block8426
1142	6	49.699	Block3369	4.576	**	113.18	104.455		1123	6	44.587	Block3326	8.199	****	55.9375	65.3299		194	2	3.041	Block596	0.14	367.578	0.3	1.51304		194	2	3.041	Block596	3.2	237.196	7.1	5.92758			1212	7	7.821	Block3569	3.588	*	2.95	3.16295		2866	16	12.018	Block8427
1143	6	49.774	Block3371	3.129	*	111.857	104.699		1124	6	45.358	Block3329	4.572	**	56.8471	64.8812		195	2	3.097	Block597	0.13	367.623	0.3	1.46775		195	2	3.097	Block597	3.24	236.988	7.2	5.89459			1213	7	7.991	Block3578	3.588	*	2.95	3.16295		2867	16	12.211	Block8428
1144	6	49.805	Block3372	3.331	*	111.857	104.39		1125	6	45.425	Block3330	4.765	**	56.8471	64.9922		196	2	3.125	Block599	0.05	368.34	0.1	0.899037		196	2	3.125	Block599	2.9	238.895	6.5	5.59124			1214	7	8.015	Block3579	3.588	*	2.95	3.16295		2868	16	12.31	Block8430
1145	6	49.852	Block3375	3.043	*	111.857	104.772		1126	6	45.663	Block3331	5.91	**	56.1833	64.9922		197	2	3.229	Block601	0.05	368.35	0.1	0.89006		197	2	3.229	Block601	2.87	239.021	6.4	5.57955			1215	7	8.098	Block3594	3.745	*	2.95	3.16676		2869	16	13.163	Block8431
1146	6	49.881	Block3376	2.949	*	111.857	104.882		1127	6	45.742	Block3335	3.92	**	57.6778	64.9542		198	2	3.263	Block603	0.09	367.964	0.2	1.28393		198	2	3.263	Block603	3.85	233.697	8.5	6.67798			1216	7	8.128	Block3595	3.588	*	2.95	3.16295		2870	16	13.258	Block8432
1147	6	50.055	Block3377	2.946	*	111.857	104.872		1128	6	45.856	Block3338	4.345	**	57.5684	64.9542		199	2	3.519	Block607	0.14	367.596	0.3	-1.52471		199	2	3.519	Block607	3.24	236.993	7.2	6.05232			1217	7	8.367	Block3670	3.745	*	2.95	3.16676		2871	16	13.866	Block8433
1148	6	50.191	Block3379	3.171	*	111.857	104.632		1129	6	46.2	Block3340	2.761	*	58.7263	64.8831		200	2	3.586	Block611	0	368.762	0	-0.11707		200	2	3.586	Block611	3.3	236.656	7.4	6.75868			1218	7	8.389	Block3671	3.588	*	2.95	3.16295		2872	16	14.324	Block8434
1157	6	50.696	Block3408	3.195	*	112.305	104.666		1130	6	46.371	Block3342	3.422	*	58	64.9218		201	2	3.636	Block622	0.05	368.335	0.1	-0.966036		201	2	3.636	Block622	1.79	245.087	4.1	4.73017			1219	7	8.421	Block3676	3.032	*	2.95	3.14895		2873	16	14.415	Block8435
1158	6	50.842	Block3409	4.337	**	113.255	104.516		1131	6	46.668	Block3344	2.761	*	58.7263	64.8831		202	2	3.67	Block623	0.07	368.158	0.2	-1.14868		202	2	3.67	Block623	1.76	245.277	4	4.69358			1223	7	9.623	Block3696	2.866	*	2.91667	3.15018		2874	16	14.547	Block8436
1159	6	50.933	Block3411	3.523	*	112.576	104.725		1133	6	46.872	Block3350	4.195	**	57.619	64.8797		203	2	3.721	Block624	0.06	368.288	0.1	-1.01809		203	2	3.721	Block624	1.84	244.819	4.2	4.79089			1224	7	9.682	Block3707	3.437	*	2.91667	3.16799		2875	16	14.996	Block8437
1160	6	51.132	Block3412	3.594	*	112.576	104.655		1134	6	47.317	Block3351	3.595	*	58.2636	64.8797		204	2	3.806	Block628	0.02	368.608	0	-0.407093		204	2	3.806	Block628	0.78	250.859	1.8	2.18238			1225	7	9.773	Block3725	5.751	**	2.954	3.16799		2876	16	15.619	Block8438
1161	7	0.007	Block3413	4.398	**	116.167	104.88		1135	6	47.346	Block3352	4.195	**	57.619	64.8797		205	2	4.069	Block646	0	368.761	0	-0.0972324		205	2	4.069	Block646	1.26	248.134	2.9	3.07444			1226	7	9.84	Block3726	7.364	***	2.93125	3.1702		2877	16	15.727	Block8439
1162	7	0.148	Block3414	4.398	**	116.167	104.88		1136	6	47.368	Block3354	4.307	**	57.619	64.9185		206	2	4.261	Block659	0	368.749	0	0.195753		206	2	4.261	Block659	2.09	243.412	4.7	4.98504			1227	7	10.071	Block3730	9.756	****	2.89348	3.17134		2878	16	18.537	Block8440
1163	7	0.44	Block3415	4.443	**	116.167	104.784		1161	7	0.007	Block3413	7.171	***	74.125	63.9181		207	2	4.32	Block660	0	368.766	0	-0.0612778		207	2	4.32	Block660	1.99	243.935	4.5	4.88413			1228	7	10.106	Block3731	7.429	***	2.93125	3.17134		2879	16	18.638	Block8441
1164	7	0.609	Block3416	2.877	*	114.155	104.978		1162	7	0.148	Block3414	7.171	***	74.125	63.9181		208	2	4.372	Block662	0	368.761	0	-0.120082		208	2	4.372	Block662	2.24	242.578	5	5.10216			1229	7	10.161	Block3736	2.899	*	2.91667	3.15111		2880	16	18.839	Block8442
1165	7	0.666	Block3422	2.9	*	114.155	104.832		1163	7	0.44	Block3415	7.271	***	74.125	63.7709		209	2	4.456	Block664	0	368.755	0	0.160342		209	2	4.456	Block664	2.2	242.763	5	5.12656			1232	7	10.335	Block3747	5.345	**	2.966	3.16709		2881	16	18.926	Block8443
1166	7	0.737	Block3424	2.85	*	114.155	104.942		1164	7	0.609	Block3416	5.744	**	73.3455	63.8803		210	2	4.538	Block668	0.02	368.592	0	-0.626701		210	2	4.538	Block668	2.36	241.869	5.3	5.50872			1275	7	19.175	Block3919	4.418	**	2.97895	3.15308		2882	16	19	Block8444
1168	7	0.905	Block3430	2.976	*	114.155	104.713		1165	7	0.666	Block3422	5.976	**	73.3455	63.5262		211	2	4.592	Block670	0.01	368.669	0	-0.469566		211	2	4.592	Block670	2.26	242.439	5.1	5.39199			1276	7	19.551	Block3920	4.091	**	2.97778	3.15308		2883	16	19.117	Block8445
1172	7	2.511	Block3445	3.813	*	117.925	104.821		1166	7	0.737	Block3424	5.733	**	73.3455	63.804		212	2	4.678	Block674	0.06	368.235	0.1	-0.96975		212	2	4.678	Block674	1.3	247.858	3	3.66181			1277	7	20.163	Block3921	5.001	**	2.96176	3.15369		2884	16	21.07	Block8446
1175	7	3.326	Block3452	3.929	**	119.45	104.6		1167	7	0.811	Block3426	5.529	**	73.3455	63.9994		213	2	4.808	Block675	0.02	368.622	0	-0.507488		213	2	4.808	Block675	1.52	246.649	3.4	3.93694			1278	7	20.287	Block3922	4.966	**	2.96176	3.15272		2885	16	21.107	Block8447
1181	7	4.56	Block3462	2.731	*	119.125	104.812		1168	7	0.905	Block3430	5.913	**	73.3455	63.6584		214	2	4.902	Block677	0.01	368.682	0	-0.384472		214	2	4.902	Block677	1.92	244.345	4.3	4.36678			1279	7	20.733	Block3923	5.001	**	2.96176	3.15369		2886	16	21.203	Block8448
1183	7	4.876	Block3465	3.367	*	117.8	104.688		1169	7	0.964	Block3432	3.732	*	73.7857	63.8599		215	2	5.013	Block692	0.05	368.337	0.1	0.986987		215	2	5.013	Block692	4.18	231.905	9.2	7.30061			1280	7	24.247	Block3925	5.001	**	2.96176	3.15369		2887	16	21.469	Block8449
1184	7	5.073	Block3467	5.275	**	121.391	104.267		1170	7	1.158	Block3438	3.714	*	73.7857	63.8268		216	2	5.095	Block695	0.01	368.657	0	0.504372		216	2	5.095	Block695	2.83	239.244	6.3	6.09365			1288	7	35.438	Block3943	3.409	*	3.35714	3.14362		2888	16	21.506	Block8451
1185	7	5.107	Block3468	6.691	***	123.85	104.267		1171	7	1.351	Block3441	3.871	**	71.7727	63.7317		217	2	5.152	Block698	0.02	368.573	0.1	0.625294		217	2	5.152	Block698	2.3	242.214	5.2	5.15666			1289	7	35.63	Block3950	3.775	*	3.35714	3.12518		2889	16	21.54	Block8452
1186	7	5.183	Block3469	4.449	**	120.627	104.352		1172	7	2.511	Block3445	3.155	*	72.25	63.7274		218	2	5.386	Block711	0.28	366.375	0.6	2.49638		218	2	5.386	Block711	3.78	234.075	8.4	7.46206			1296	7	36.116	Block3988	2.889	*	3.2525	3.125		2890	16	21.605	Block8458
1187	7	5.416	Block3473	5.84	**	124.533	104.352		1175	7	3.326	Block3452	3.472	*	74.39	63.5229		219	2	5.442	Block714	0.26	366.55	0.6	2.42676		219	2	5.442	Block714	3.89	233.443	8.6	7.64581			1485	8	40.745	Block4707	3.16	*	3.01591	3.15086		2891	16	21.79	Block8459
1188	7	5.867	Block3474	3.914	**	120.437	104.352		1176	7	3.9	Block3455	2.977	*	75.4	63.5513		220	2	5.489	Block715	0.25	366.657	0.6	2.43015		220	2	5.489	Block715	4.17	231.972	9.2	8.10527			1486	8	40.888	Block4708	3.204	*	3.01591	3.15118		2892	16	21.956	Block8460
1190	7	6.162	Block3476	2.993	*	118.212	104.52		1181	7	4.56	Block3462	3.56	*	75.475	63.6132		221	2	5.553	Block719	0.45	364.965	1	3.54578		221	2	5.553	Block719	6.34	220.609	13.6	10.7335			1527	8	46.175	Block4801	7.999	****	2.90333	3.15805		2893	16	24.157	Block8461
1192	7	6.296	Block3489	3.359	*	119.175	104.866		1182	7	4.618	Block3463	2.849	*	73.7	63.6132		222	2	5.644	Block720	0.37	365.659	0.8	3.27939		222	2	5.644	Block720	6.4	220.266	13.8	11.0331			1528	8	46.229	Block4805	7.898	****	2.90333	3.15525		2894	16	24.207	Block8463
1193	7	6.464	Block3491	3.195	*	119.91	104.866		1183	7	4.876	Block3465	2.773	*	72.85	63.6048		223	2	5.738	Block722	0.28	366.361	0.7	2.91999		223	2	5.738	Block722	6.66	218.984	14.3	11.3672			1529	8	46.277	Block4806	5.616	**	2.94687	3.15525		2895	16	24.278	Block8467
1194	7	6.512	Block3492	3.187	*	119.91	104.942		1184	7	5.073	Block3467	4.506	**	74.9909	63.314		224	2	5.792	Block723	0.28	366.353	0.7	2.9072		224	2	5.792	Block723	6.64	219.054	14.2	11.2877			1530	8	46.396	Block4807	5.257	**	2.94333	3.15525		2896	16	24.307	Block8468
1195	7	6.56	Block3497	3.322	*	119.175	104.906		1185	7	5.107	Block3468	5.319	**	76.54	63.314		225	2	5.88	Block726	0.25	366.625	0.6	2.70701		225	2	5.88	Block726	6.1	221.846	13.2	10.7209			1629	9	46.257	Block5042	3.3	*	3.03654	3.16042		2897	16	24.562	Block8469
1196	7	6.602	Block3502	3.371	*	119.175	104.81		1186	7	5.183	Block3469	2.999	*	73.0909	63.4476		226	2	5.921	Block728	0.33	365.965	0.8	3.06216		226	2	5.921	Block728	5.88	222.978	12.7	10.4234			1634	9	46.819	Block5055	4.089	**	3.02333	3.1649		2898	16	24.6	Block8470
1198	7	6.862	Block3504	3.726	*	116.873	104.672		1187	7	5.416	Block3473	4.632	**	76.8556	63.4476		227	2	6.008	Block729	0.25	366.625	0.6	2.70701		227	2	6.008	Block729	6.1	221.846	13.2	10.7209			1637	9	47.271	Block5069	3.397	*	3.04861	3.16713		2899	16	24.677	Block8471
1199	7	6.951	Block3505	3.67	*	116.873	104.76		1188	7	5.867	Block3474	2.968	*	74.4125	63.4476		228	2	6.098	Block732	0.09	367.977	0.2	1.71568		228	2	6.098	Block732	5.41	225.411	11.8	10.5737			1638	9	47.419	Block5070	4.218	**	3.03571	3.16713		2900	16	24.808	Block8472
1201	7	7.044	Block3508	3.639	*	116.167	104.652		1190	7	6.162	Block3476	2.948	*	74.425	63.5022		229	2	6.309	Block742	0.11	367.835	0.3	1.82891		229	2	6.309	Block742	4.9	228.089	10.7	9.90332			1639	9	47.467	Block5071	3.397	*	3.04861	3.16713		2920	16	29.851	Block8497
1202	7	7.086	Block3509	3.578	*	116.167	104.74		1201	7	7.044	Block3508	2.845	*	71.9833	63.5613		230	2	6.35	Block745	0.01	368.667	0	0.57105		230	2	6.35	Block745	3.12	237.656	7	7.57635			1640	9	47.563	Block5072	3.222	*	3.04861	3.16445		2921	16	29.897	Block8498
1203	7	7.136	Block3512	3.615	*	116.167	104.67		1202	7	7.086	Block3509	2.769	*	71.9833	63.6962		231	2	6.555	Block754	0.45	364.92	1	4.25282		231	2	6.555	Block754	3.49	235.652	7.8	9.64747			1727	10	12.837	Block5229	3.632	*	2.99118	3.15306		2929	16	31.272	Block8515
1204	7	7.213	Block3519	3.735	*	116.167	104.529		1203	7	7.136	Block3512	2.852	*	71.9833	63.6418		232	2	6.786	Block758	0.45	364.952	1	3.69825		232	2	6.786	Block758	2.19	242.844	4.9	6.72292			1728	10	13.066	Block5230	3.297	*	2.99063	3.15306		2935	16	31.822	Block8537
1205	7	7.245	Block3520	3.713	*	116.167	104.518		1204	7	7.213	Block3519	2.972	*	71.9833	63.5257		233	2	6.899	Block764	0.41	365.299	0.9	3.8415		233	2	6.899	Block764	2.76	239.655	6.2	8.19904			1729	10	13.096	Block5231	3.632	*	2.99118	3.15306		2936	16	31.858	Block8540
1206	7	7.303	Block3524	3.639	*	116.167	104.652		1205	7	7.245	Block3520	2.967	*	71.9833	63.5044		234	2	6.919	Block765	0.27	366.484	0.6	3.01009		234	2	6.919	Block765	2.37	241.847	5.3	7.34699			1730	10	13.306	Block5232	3.297	*	2.99063	3.15306		2939	16	32.076	Block8545
1207	7	7.333	Block3525	3.578	*	116.167	104.74		1206	7	7.303	Block3524	2.845	*	71.9833	63.5613		235	2	6.961	Block766	0.39	365.441	0.9	3.60809		235	2	6.961	Block766	2.55	240.835	5.7	7.56389			1731	10	13.349	Block5233	3.632	*	2.99118	3.15306		2940	16	32.134	Block8546
1209	7	7.468	Block3530	3.639	*	116.167	104.652		1207	7	7.333	Block3525	2.769	*	71.9833	63.6962		236	2	7.056	Block768	0.21	366.978	0.5	2.82044		236	2	7.056	Block768	1.43	247.122	3.3	6.08616			1867	11	3.61	Block5525	3.927	**	3.228	3.11022		2946	16	32.579	Block8565
1210	7	7.6	Block3531	3.578	*	116.167	104.74		1209	7	7.468	Block3530	2.845	*	71.9833	63.5613		237	2	7.107	Block774	0.12	367.733	0.3	1.88465		237	2	7.107	Block774	0.64	251.724	1.5	3.57956			1868	11	3.686	Block5527	2.861	*	3.21265	3.11486		2948	16	32.792	Block8575
1234	7	10.493	Block3754	9.653	****	92.8647	106.183		1210	7	7.6	Block3531	2.769	*	71.9833	63.6962		238	2	7.233	Block782	0.35	365.793	0.8	3.76042		238	2	7.233	Block782	1.97	244.046	4.5	7.36501			1869	11	3.733	Block5529	3.727	*	3.22594	3.11403		2952	16	33.125	Block8590
1235	7	10.81	Block3758	4.491	**	96.7462	106.183		1234	7	10.493	Block3754	4.239	**	57.0824	64.836		239	2	7.319	Block783	0.35	365.808	0.8	3.91928		239	2	7.319	Block783	2.28	242.336	5.1	8.25186			1870	11	4.051	Block5530	3.236	*	3.21909	3.11486		3028	17	7.231	Block8780
1236	7	13.694	Block3759	5.578	**	96.15	106.183		1263	7	17.182	Block3873	4.87	**	55.6389	65.0633		240	2	7.376	Block786	0.09	368.001	0.2	2.3053		240	2	7.376	Block786	2.19	242.818	4.9	9.35893			1872	11	4.159	Block5533	2.736	*	3.22759	3.12255		3040	17	8.711	Block8801
1237	7	14.128	Block3764	6.219	**	94.8154	106.026		1264	7	17.241	Block3877	4.609	**	53.45	64.8883		241	2	7.522	Block789	0.02	368.618	0	0.952759		241	2	7.522	Block789	1.35	247.572	3.1	6.91763			1874	11	4.436	Block5535	3.028	*	3.22903	3.12072		3042	17	9.067	Block8804
1238	7	14.612	Block3766	6.268	**	94.8154	105.871		1295	7	36.079	Block3984	3.853	**	55.8538	64.8476		242	2	7.569	Block790	0.08	368.111	0.2	2.02147		242	2	7.569	Block790	1.77	245.19	4	7.99111			1877	11	4.663	Block5540	3.335	*	3.24138	3.12271		3044	17	9.385	Block8809
1239	7	14.847	Block3771	6.219	**	94.8154	106.026		1296	7	36.116	Block3988	5.051	**	55.2429	64.9429		243	2	7.601	Block793	0.14	367.56	0.3	2.64611		243	2	7.601	Block793	1.77	245.22	4	7.70173			1878	11	4.686	Block5541	3.507	*	3.24138	3.11901		3045	17	9.453	Block8810
1240	7	14.923	Block3775	5.036	**	95.35	106.007		1297	7	36.18	Block3990	3.853	**	55.8538	64.8476		244	2	7.635	Block795	0.1	367.883	0.2	1.9707		244	2	7.635	Block795	1.2	248.451	2.7	5.54512			1879	11	4.711	Block5542	3.507	*	3.24138	3.11901		3046	17	9.482	Block8811
1241	7	14.998	Block3776	5.137	**	95.35	106.103		1298	7	36.257	Block3992	3.853	**	55.8538	64.8476		245	2	7.731	Block799	0.09	368.001	0.2	2.3053		245	2	7.731	Block799	2.19	242.818	4.9	9.35893			1880	11	4.734	Block5543	3.541	*	3.24138	3.11722		3178	18	0.188	Block9161
1242	7	15.065	Block3777	5.036	**	95.35	106.007		1299	7	36.285	Block3993	3.278	*	56.125	64.8476		246	2	7.935	Block808	0.01	368.71	0	-0.379961		246	2	7.935	Block808	0.05	255.171	0.1	0.845201			1881	11	4.856	Block5544	3.804	*	3.24138	3.11245		3179	18	0.381	Block9162
1244	7	15.262	Block3783	5.036	**	95.35	106.007		1302	7	36.657	Block4007	2.822	*	56.8769	64.7757		247	2	8.031	Block810	0.01	368.71	0	-0.379961		247	2	8.031	Block810	0.05	255.171	0.1	0.845201			1882	11	4.905	Block5545	4.215	**	3.24167	3.11148		3180	18	0.475	Block9163
1245	7	15.309	Block3784	5.777	**	95.0923	106.007		1304	7	36.733	Block4011	2.822	*	56.8769	64.7757		248	2	8.064	Block811	0.04	368.431	0.1	-0.93735		248	2	8.064	Block811	0.03	255.278	0.1	0.68148			1884	11	5.138	Block5558	3.415	*	3.24167	3.13115		3215	18	5.279	Block9249
1248	7	15.467	Block3794	4.45	**	99.928	106.108		1308	7	36.961	Block4036	2.822	*	56.8769	64.7757		249	2	8.119	Block814	0	368.743	0	-0.244183		249	2	8.119	Block814	0.05	255.152	0.1	0.85412			1885	11	5.172	Block5562	4.215	**	3.24167	3.11148		3216	18	5.327	Block9250
1249	7	15.525	Block3795	4.65	**	99.928	106.249		1310	7	37.057	Block4040	4.42	**	56.8273	65.3282		250	2	8.2	Block821	0.1	367.891	0.2	2.2931		250	2	8.2	Block821	1.94	244.213	4.4	8.21081			1886	11	5.368	Block5563	3.931	**	3.24167	3.11629		3305	18	54.467	Block9507
1250	7	15.582	Block3804	5.048	**	95.35	105.972		1311	7	37.102	Block4041	5.507	**	56.2087	65.3282		251	2	8.253	Block827	0.13	367.651	0.3	2.33439		251	2	8.253	Block827	1.18	248.597	2.7	5.78559			1887	11	5.64	Block5564	4.173	**	3.24167	3.11359		3306	18	54.902	Block9510
1251	7	15.692	Block3813	4.45	**	99.928	106.108		1317	7	37.519	Block4074	3.236	*	54.7889	64.8353		252	2	8.283	Block828	0.17	367.292	0.4	2.22165		252	2	8.283	Block828	0.72	251.253	1.6	3.74976			1888	11	5.665	Block5565	3.709	*	3.23387	3.11359		3307	18	54.975	Block9511
1252	7	15.774	Block3819	5.825	**	95.0923	106.047		1318	7	37.594	Block4075	3.325	*	54.7889	64.9204		253	2	8.309	Block831	0.23	366.79	0.5	2.60047		253	2	8.309	Block831	0.92	250.056	2.1	4.29723			1889	11	5.829	Block5566	3.961	**	3.23281	3.10937		3390	19	33.095	Block9767
1253	7	15.869	Block3833	6.141	**	95.0923	106.108		1319	7	37.623	Block4077	3.236	*	54.7889	64.8353		254	2	8.369	Block833	0.37	365.608	0.9	3.54027		254	2	8.369	Block833	1.3	247.909	3	5.47139			1890	11	5.983	Block5569	4.161	**	3.23281	3.10521		3391	19	33.309	Block9768
1254	7	16.019	Block3835	5.452	**	95.35	106.308		1320	7	37.74	Block4078	3.847	**	54.57	64.8353		255	2	8.423	Block836	0.2	367.098	0.5	2.90683		255	2	8.423	Block836	1.52	246.627	3.5	6.68327			1891	11	6.035	Block5572	3.223	*	3.23281	3.12112		3392	19	33.344	Block9769
1255	7	16.109	Block3836	5.702	**	94.6182	106.291		1321	7	37.848	Block4079	3.236	*	54.7889	64.8353		256	2	8.53	Block837	0.1	367.947	0.2	2.01979		256	2	8.53	Block837	1.18	248.584	2.7	5.84242			1892	11	6.086	Block5576	3.895	**	3.23281	3.10819		3404	19	34.326	Block9791
1256	7	16.18	Block3849	6.199	**	94.4	106.218		1322	7	37.906	Block4080	3.17	*	54.7889	64.7702		257	2	8.567	Block838	0.2	367.098	0.5	2.90683		257	2	8.567	Block838	1.52	246.627	3.5	6.68327			1893	11	6.125	Block5580	3.718	*	3.23281	3.1121		3691	20	36.419	Block10843
1257	7	16.205	Block3851	6.071	**	94.4	106.033		1323	7	37.941	Block4081	3.236	*	54.7889	64.8353		258	2	8.604	Block839	0.25	366.646	0.6	3.30743		258	2	8.604	Block839	1.76	245.269	4	7.24673			1894	11	6.773	Block5581	3.78	*	3.23182	3.11148		3692	20	36.454	Block10844
1258	7	16.265	Block3860	6.132	**	94.4	106.019		1324	7	38.141	Block4082	3.824	*	54.61	64.8353		259	2	8.635	Block840	0.1	367.891	0.2	2.2931		259	2	8.635	Block840	1.94	244.213	4.4	8.21081			1895	11	6.931	Block5582	3.718	*	3.23281	3.1121		3693	20	36.526	Block10860
1259	7	16.369	Block3862	5.357	**	93.7385	106.019		1325	7	38.276	Block4086	3.698	*	54.61	64.75		260	2	8.674	Block843	0.3	366.229	0.7	3.90221		260	2	8.674	Block843	2.59	240.575	5.8	9.44627			1896	11	6.985	Block5583	3.874	**	3.23281	3.11007		3694	20	36.571	Block10874
1260	7	16.583	Block3867	5.433	**	93.7385	106.224		1326	7	38.404	Block4087	3.782	*	54.61	64.8164		261	2	8.735	Block846	0.08	368.077	0.2	1.805		261	2	8.735	Block846	1.04	249.364	2.4	5.36163			1898	11	7.342	Block5605	4.741	**	3.23056	3.0983		3695	20	36.605	Block10876
1261	7	16.965	Block3869	6.276	**	93.5429	106.224		1327	7	38.453	Block4089	3.741	*	54.61	64.7702		262	2	8.77	Block848	0.12	367.734	0.3	2.1746		262	2	8.77	Block848	1.04	249.375	2.4	5.2727			1899	11	7.425	Block5622	4.937	**	3.24677	3.1079		3696	20	36.658	Block10881
1262	7	17	Block3870	5.433	**	93.7385	106.224		1328	7	38.515	Block4095	3.824	*	54.61	64.8353		263	2	8.809	Block849	0.12	367.734	0.3	2.1746		263	2	8.809	Block849	1.04	249.375	2.4	5.2727			1900	11	7.492	Block5624	4.384	**	3.25	3.11014		3697	20	36.703	Block10882
1295	7	36.079	Block3984	3.688	*	93.5769	106.285		1329	7	38.806	Block4097	4.043	**	54.61	65.0011		264	2	8.843	Block854	0.03	368.543	0.1	0.748591		264	2	8.843	Block854	0.23	254.124	0.5	1.82145			1901	11	7.646	Block5626	3.62	*	3.26429	3.11533		3698	20	36.755	Block10891
1296	7	36.116	Block3988	4.409	**	93.4643	106.362		1330	7	38.851	Block4098	3.824	*	54.61	64.8353		265	2	9.058	Block855	0.07	368.203	0.2	1.20522		265	2	9.058	Block855	0.34	253.481	0.8	2.25395			1902	11	8.102	Block5634	3.664	*	3.26429	3.11651		3699	20	36.844	Block10893
1297	7	36.18	Block3990	3.688	*	93.5769	106.285		1331	7	38.957	Block4099	3.17	*	54.7889	64.7723		266	2	9.112	Block856	0.07	368.2	0.2	1.22922		266	2	9.112	Block856	0.33	253.489	0.8	2.28709			1908	11	8.637	Block5699	2.791	*	3.26053	3.12059		3700	20	36.903	Block10907
1298	7	36.257	Block3992	3.688	*	93.5769	106.285		1332	7	39.643	Block4101	4.808	**	57.0571	65.1824		267	2	9.14	Block859	0.21	366.989	0.5	2.44227		267	2	9.14	Block859	0.79	250.839	1.8	3.93415			1909	11	8.757	Block5700	3.364	*	3.2675	3.12059		3702	20	37.004	Block10920
1299	7	36.285	Block3993	3.018	*	93.7917	106.285		1333	7	39.711	Block4102	5.939	**	56.4	65.1824		268	2	9.178	Block860	0.2	367.034	0.5	2.36014		268	2	9.178	Block860	0.78	250.909	1.8	3.82135			1910	11	8.888	Block5708	5.856	**	3.31	3.13239		3703	20	37.031	Block10921
1311	7	37.102	Block4041	3.417	*	96.7826	106.576		1383	8	9.961	Block4234	2.736	*	46.8	64.4964		269	2	9.273	Block864	0.07	368.148	0.2	1.30629		269	2	9.273	Block864	0.4	253.123	0.9	2.53458			1929	11	10.651	Block5810	2.798	*	3.27188	3.11981		3704	20	37.058	Block10927
1317	7	37.519	Block4074	3.323	*	90.8667	106.26		1385	8	10.229	Block4245	2.769	*	60.4724	65.443		270	2	9.416	Block868	0.02	368.598	0	0.791356		270	2	9.416	Block868	0.49	252.583	1.1	3.25043			1930	11	11.087	Block5815	6.789	***	3.48	3.12473		3717	20	37.826	Block11023
1318	7	37.594	Block4075	3.303	*	90.8667	106.266		1386	8	10.26	Block4246	2.789	*	60.4949	65.4701		271	2	9.493	Block869	0.03	368.488	0.1	1.00828		271	2	9.493	Block869	0.54	252.298	1.2	3.38791			1931	11	11.131	Block5819	3.673	*	3.36667	3.12732		3722	20	38.062	Block11048
1319	7	37.623	Block4077	3.323	*	90.8667	106.26		1389	8	10.382	Block4259	2.884	*	60.4883	65.5105		272	2	9.64	Block878	0.4	365.344	0.9	4.35894		272	2	9.64	Block878	2.27	242.403	5.1	8.51087			1932	11	11.207	Block5822	4.934	**	3.38571	3.13955		3723	20	38.102	Block11050
1320	7	37.74	Block4078	4.085	**	90.88	106.26		1390	8	10.612	Block4262	3.061	*	60.3339	65.5105		273	2	9.698	Block879	0.53	364.232	1.2	4.83581		273	2	9.698	Block879	2.94	238.665	6.6	9.30357			1935	11	12.351	Block5832	8.431	****	3.48333	3.1225		3724	20	38.127	Block11051
1321	7	37.848	Block4079	3.323	*	90.8667	106.26		1391	8	10.67	Block4268	2.808	*	46.8	65.5105		274	2	9.792	Block883	0.21	366.982	0.5	2.83596		274	2	9.792	Block883	1.63	245.981	3.7	6.5321			1936	11	12.767	Block5833	6.789	***	3.48	3.12473		3740	20	40.119	Block11083
1322	7	37.906	Block4080	3.256	*	90.8667	106.179		1392	8	10.713	Block4269	3.458	*	54.0429	65.5105		275	2	9.853	Block887	0.06	368.256	0.1	1.12507		275	2	9.853	Block887	0.45	252.838	1	2.54513			1939	11	14.099	Block5843	8.431	****	3.48333	3.1225		3741	20	40.154	Block11084
1323	7	37.941	Block4081	3.323	*	90.8667	106.26		1406	8	11.783	Block4432	3.272	*	60.1302	65.5914		276	2	10.067	Block888	0.04	368.445	0.1	0.798912		276	2	10.067	Block888	0.4	253.101	0.9	2.15735			1940	11	15.052	Block5844	6.146	**	3.41429	3.12323		3774	20	46.735	Block11170
1324	7	38.141	Block4082	3.392	*	91.75	106.26		1485	8	40.745	Block4707	3.136	*	58.15	65.0994		277	2	10.241	Block898	0.06	368.232	0.1	1.1701		277	2	10.241	Block898	0.03	255.27	0.1	0.689592			1941	11	15.097	Block5846	4.667	**	3.4	3.12473		3775	20	46.873	Block11172
1325	7	38.276	Block4086	3.142	*	91.75	105.986		1486	8	40.888	Block4708	3.01	*	58.15	64.9709		278	2	10.397	Block899	0.11	367.792	0.3	1.61005		278	2	10.397	Block899	0.02	255.335	0	0.566309			1942	11	15.528	Block5847	3.204	*	3.34286	3.12548		3776	20	46.95	Block11173
1326	7	38.404	Block4087	3.217	*	91.75	106.068		1508	8	43.753	Block4758	3.272	*	55.7333	64.6989		279	2	10.522	Block905	0.39	365.487	0.9	3.85799		279	2	10.522	Block905	0.66	251.564	1.5	4.20194			1943	11	15.645	Block5848	4.629	**	3.4	3.12548		3777	20	47.032	Block11174
1327	7	38.453	Block4089	3.315	*	91.75	106.179		1526	8	46.102	Block4799	3.277	*	74.68	63.8829		280	2	10.754	Block908	0.6	363.71	1.4	4.6746		280	2	10.754	Block908	0.83	250.601	1.9	4.57985			1944	11	15.713	Block5850	4.629	**	3.4	3.12548
1328	7	38.515	Block4095	3.392	*	91.75	106.26		1531	8	46.549	Block4813	3.512	*	76.375	63.8829		281	2	10.828	Block909	0.5	364.516	1.2	4.35569		281	2	10.828	Block909	0.81	250.719	1.9	4.59713			1945	11	17.595	Block5851	4.722	**	3.4	3.12323
1329	7	38.806	Block4097	3.464	*	91.75	106.367		1540	9	0.648	Block4833	3.431	*	54.6917	64.7027		282	2	11.006	Block910	0.26	366.588	0.6	3.17222		282	2	11.006	Block910	0.56	252.156	1.3	3.90303			1946	11	19.608	Block5852	6.896	***	3.48	3.1225
1330	7	38.851	Block4098	3.392	*	91.75	106.26		1541	9	0.688	Block4834	3.431	*	54.6917	64.7027		283	2	11.262	Block911	0.33	365.947	0.8	3.57754		283	2	11.262	Block911	0.5	252.49	1.2	3.66841			1947	11	20.388	Block5853	6.789	***	3.48	3.12473
1331	7	38.957	Block4099	3.343	*	90.8667	106.226		1544	9	1.389	Block4842	3.552	*	54.57	64.655		284	2	11.846	Block914	0.53	364.271	1.2	4.40756		284	2	11.846	Block914	0.65	251.618	1.5	4.07182			1948	11	21.501	Block5854	6.831	***	3.48	3.124
1333	7	39.711	Block4102	3.448	*	97.4545	106.398		1618	9	44.435	Block5025	3.322	*	69.9143	63.3785		285	2	11.997	Block915	0.41	365.258	1	3.92497		285	2	11.997	Block915	0.52	252.372	1.2	3.67908			1949	11	24.383	Block5858	3.861	**	3.38333	3.12533
1336	7	41.663	Block4118	2.821	*	94.6571	106.135		1619	9	44.949	Block5026	3.432	*	69.9143	63.3028		286	2	12.359	Block916	0.68	362.987	1.6	4.85674		286	2	12.359	Block916	0.74	251.147	1.7	4.19284			1950	11	24.41	Block5859	3.861	**	3.38333	3.12533
1383	8	9.961	Block4234	3.143	*	81.15	105.673		1620	9	45.101	Block5027	3.322	*	69.9143	63.3785		287	2	12.411	Block918	0.58	363.822	1.3	4.55979		287	2	12.411	Block918	0.71	251.269	1.6	4.19542			1951	11	25.477	Block5862	6.831	***	3.48	3.124
1384	8	10.007	Block4236	3.136	*	81.15	105.577		1621	9	45.178	Block5028	4.172	**	69.975	63.2575		288	2	12.701	Block919	0.55	364.134	1.3	4.58531		288	2	12.701	Block919	0.64	251.69	1.5	4.13354			1953	11	26.199	Block5866	2.914	*	3.5	3.12994
1391	8	10.67	Block4268	2.931	*	81.15	105.167		1622	9	45.43	Block5029	4.32	**	69.975	63.1798		289	2	12.766	Block920	0.57	363.964	1.3	4.86771		289	2	12.766	Block920	0.76	251.026	1.7	4.67483			1954	11	26.813	Block5868	6.831	***	3.48	3.124
1409	8	12.097	Block4451	4.446	**	91.1167	105.626		1623	9	45.611	Block5031	2.881	*	68.0348	63.5657		290	2	13.695	Block921	0.61	363.561	1.4	4.90286		290	2	13.695	Block921	0.76	250.994	1.7	4.53868			1955	11	27.366	Block5869	4.667	**	3.4	3.12473
1410	8	12.297	Block4452	4.477	**	91.1167	105.604		1624	9	45.649	Block5032	2.76	*	68.0348	63.6403		291	2	13.751	Block927	0.47	364.782	1.1	-2.13641		291	2	13.751	Block927	0.09	254.925	0.2	-0.779566			1956	11	27.518	Block5870	6.831	***	3.48	3.124
1411	8	12.366	Block4454	4.525	**	91.1167	105.901		1625	9	45.756	Block5033	2.881	*	68.0348	63.5657		292	2	13.878	Block935	0.37	365.663	0.8	-1.82581		292	2	13.878	Block935	0.14	254.645	0.3	-0.933182			1957	11	28.067	Block5871	6.789	***	3.48	3.12473
1412	8	12.396	Block4457	4.342	**	91.1167	105.746		1626	9	45.78	Block5034	2.76	*	68.0348	63.6403		293	2	14.015	Block944	0.46	364.828	1.1	3.24899		293	2	14.015	Block944	0.3	253.696	0.7	2.17146			1958	11	28.355	Block5873	3.803	*	3.46667	3.12912
1413	8	12.76	Block4458	4.326	**	91.1167	105.642		1631	9	46.366	Block5050	2.881	*	68.0348	63.5657		294	2	14.155	Block945	0.42	365.178	1	3.15637		294	2	14.155	Block945	0.28	253.789	0.7	2.15073			1960	11	28.831	Block5875	3.803	*	3.46667	3.12912
1414	8	12.96	Block4460	6.158	**	89.7714	105.796		1632	9	46.459	Block5051	2.76	*	68.0348	63.6403		295	2	14.194	Block947	0.51	364.462	1.2	3.58816		295	2	14.194	Block947	0.36	253.317	0.8	2.52915			1961	11	29.984	Block5881	3.532	*	3.32143	3.12457
1415	8	13.612	Block4461	7.751	***	89.35	105.898		1633	9	46.627	Block5052	2.76	*	68.0348	63.6403		296	2	14.223	Block948	0.51	364.469	1.2	3.60119		296	2	14.223	Block948	0.35	253.38	0.8	2.50259			1969	11	30.647	Block5898	2.897	*	3.5	3.1307
1416	8	13.765	Block4462	12.37	******	83.3143	105.898		1636	9	47.083	Block5065	5.077	**	69.1143	63.5256		297	2	14.418	Block949	0.51	364.462	1.2	3.58816		297	2	14.418	Block949	0.36	253.317	0.8	2.52915			1973	11	32.313	Block5907	3.005	*	3.0025	3.15183
1417	8	14.449	Block4463	12.331	******	83.3143	105.911		1638	9	47.419	Block5070	3.283	*	67.0806	63.4428		298	2	14.479	Block950	0.8	362.04	1.8	4.48519		298	2	14.479	Block950	0.57	252.094	1.3	3.17075			1974	11	32.422	Block5930	3.108	*	2.95	3.15183
1418	8	14.617	Block4464	12.292	******	83.3143	105.987		1646	9	48.016	Block5087	3.582	*	68.6038	63.6053		299	2	14.549	Block951	0.28	366.348	0.7	2.99948		299	2	14.549	Block951	0.41	253.064	0.9	2.98179			1975	11	32.448	Block5934	6.366	**	2.90357	3.15183
1419	8	14.771	Block4471	3.798	*	96.4	106.239		1650	9	48.429	Block5098	2.765	*	68.3174	63.8061		300	2	14.82	Block979	0.44	365.038	1	3.55161		300	2	14.82	Block979	0.27	253.885	0.6	2.30459			1976	11	32.476	Block5938	4.514	**	2.92083	3.15183
1454	8	19.148	Block4644	3.244	*	98.0647	106.01		1670	10	3.162	Block5132	3.229	*	48	64.4559		301	2	14.884	Block981	0.67	363.057	1.5	4.5803		301	2	14.884	Block981	0.53	252.336	1.2	3.38567			1977	11	32.554	Block5943	4.208	**	2.97632	3.15183
1455	8	21.116	Block4645	3.147	*	98.0647	105.913		1671	10	3.22	Block5133	3.229	*	48	64.4559		302	2	15.053	Block983	0.66	363.194	1.5	4.52492		302	2	15.053	Block983	0.56	252.146	1.3	3.4872			1993	11	34.312	Block6014	4.016	**	2.89444	3.15327
1456	8	21.143	Block4646	3.078	*	98.0647	105.847		1672	10	3.293	Block5134	3.877	**	49.15	64.4559		303	2	15.649	Block988	0.6	363.669	1.4	14.3104		303	2	15.649	Block988	0.44	252.894	1	10.1428			1994	11	34.421	Block6028	5.041	**	2.92083	3.15327
1457	8	21.403	Block4648	3.244	*	98.0647	106.01		1673	10	3.545	Block5135	3.229	*	48	64.4559		304	2	15.671	Block989	0.37	365.633	0.9	10.2665		304	2	15.671	Block989	0.16	254.531	0.4	5.57589			1995	11	34.452	Block6029	4.873	**	2.92083	3.14988
1458	8	21.462	Block4651	3.147	*	98.0647	105.913		1674	10	3.976	Block5136	3.877	**	49.15	64.4559		305	2	15.803	Block990	0	368.759	0	0.927665		305	2	15.803	Block990	0.01	255.4	0	-2.37208			1997	11	34.613	Block6042	3.064	*	2.96538	3.14456
1460	8	21.575	Block4656	3.244	*	98.0647	106.01		1794	10	42.812	Block5367	2.94	*	73.88	63.8974		306	2	16.402	Block991	0.02	368.575	0.1	2.78621		306	2	16.402	Block991	0.01	255.393	0	1.5854			2001	12	0.288	Block6057	5.86	**	2.97708	3.16169
1461	8	21.755	Block4659	3.053	*	98.0647	105.764		1795	10	42.893	Block5368	3.507	*	78.4	63.8974		307	2	16.967	Block998	0.08	368.113	0.2	2.37917		307	2	16.967	Block998	0	255.429	0	0.479017			2029	12	2.991	Block6129	6.689	***	2.98571	3.16722
1464	8	22.008	Block4665	3.949	**	97.075	106.054		1843	11	0.017	Block5465	3.88	**	70.895	63.5767		308	2	17.967		0.09	367.922	0.2	2.57732		308	2	17.967		0.01	255.41	0	0.599046			2030	12	3.022	Block6130	6.631	**	2.98571	3.16699
1517	8	44.678	Block4778	3.396	*	115.644	104.896		1844	11	0.214	Block5468	3.554	*	70.895	63.9528		309	2	18.967		0.1	367.721	0.3	2.77697		309	2	18.967		0.01	255.384	0	0.726159			2031	12	3.115	Block6134	4.038	**	2.99167	3.15474
1518	8	44.727	Block4779	3.376	*	115.644	104.964		1852	11	1.416	Block5484	4.129	**	70.2609	63.272		310	2	19.967		0.11	367.523	0.3	2.97116		310	2	19.967		0.01	255.352	0	0.858212			2221	13	17.012	Block6687	3.569	*	3.30357	3.11944
1519	8	44.843	Block4782	5.322	**	120.271	104.839		1853	11	1.496	Block5485	2.828	*	69.1833	63.3805		311	2	20.967		0.12	367.335	0.4	3.16411		311	2	20.967		0.02	255.315	0.1	0.990668			2222	13	17.121	Block6688	3.569	*	3.30357	3.11944
1520	8	45.037	Block4783	5.393	**	120.271	104.761		1854	11	1.635	Block5486	3.462	*	69.492	63.3805		312	2	21.967		0.13	367.179	0.4	3.34214		312	2	21.967		0.02	255.276	0.1	1.12282			2223	13	17.167	Block6689	3.466	*	3.30357	3.12269
1521	8	45.11	Block4785	5.322	**	120.271	104.839		1871	11	4.107	Block5532	3.987	**	69.1667	63.1846		313	2	22.967		0.14	367.069	0.5	3.5049		313	2	22.967		0.03	255.238	0.1	1.25207			2224	13	17.319	Block6691	4.175	**	3.29167	3.11942
1522	8	45.175	Block4790	5.286	**	120.271	105.07		1872	11	4.159	Block5533	3.494	*	68.9969	63.1846		314	2	23.967		0.15	367.025	0.5	3.64405		314	2	23.967		0.03	255.207	0.1	1.37479			2225	13	17.784	Block6692	4.175	**	3.29167	3.11942
1523	8	45.406	Block4796	5.299	**	120.271	104.906		1873	11	4.4	Block5534	3.205	*	68.7091	63.2075		315	2	24.967		0.16	367.052	0.5	3.76495		315	2	24.967		0.04	255.188	0.1	1.48465			2226	13	18.084	Block6693	4.308	**	3.29167	3.11611
1524	8	45.576	Block4797	5.322	**	120.271	104.839		1877	11	4.663	Block5540	4.337	**	70.0875	63.2696		316	2	25.967		0.18	367.168	0.4	3.85652		316	2	25.967		0.04	255.186	0.1	1.58213			2227	13	18.124	Block6694	4.175	**	3.29167	3.11942
1525	8	45.917	Block4798	4.448	**	120.65	104.907		1878	11	4.686	Block5541	4.316	**	70.0875	63.2951		317	2	26.366	Block999	0.18	367.239	0.4	3.88514		317	2	26.366	Block999	0.04	255.191	0.1	1.61646			2228	13	18.392	Block6695	4.175	**	3.29167	3.11942
1526	8	46.102	Block4799	7.481	***	126.6	104.835		1879	11	4.711	Block5542	5.028	**	70.5548	63.2479		318	2	26.565	Block1000	0.08	368.113	0.2	2.37917		318	2	26.565	Block1000	0	255.429	0	0.479017			2229	13	18.873	Block6696	4.175	**	3.29167	3.11942
1531	8	46.549	Block4813	6.972	***	129	104.835		1880	11	4.734	Block5543	5.422	**	70.5548	62.8548		319	2	27.565		0.15	367.34	0.4	2.8045		319	2	27.565		0	255.453	0	-0.134781			2230	13	18.966	Block6697	4.175	**	3.29167	3.11942
1532	8	46.868	Block4818	3.884	**	121.6	104.97		1881	11	4.856	Block5544	5.251	**	70.5548	63.0018		320	2	28.36	Block1002	0.18	367.244	0.4	2.5861		320	2	28.36	Block1002	0	255.426	0	-0.359588			2231	13	19.183	Block6698	4.169	**	3.28684	3.1189
1540	9	0.648	Block4833	4.325	**	93.6167	106.035		1882	11	4.905	Block5545	6.503	**	71.1	62.8494		321	2	29.36		0.16	367.239	0.4	2.76849		321	2	29.36		0	255.445	0	-0.231363			2232	13	19.244	Block6700	4.306	**	3.28684	3.11558
1541	9	0.688	Block4834	4.325	**	93.6167	106.035		1884	11	5.138	Block5558	5.669	**	71.1	63.4513		322	2	30.36		0.13	367.46	0.4	2.7979		322	2	30.36		0	255.456	0	0.00497129			2233	13	19.296	Block6701	4.169	**	3.28684	3.1189
1542	9	0.887	Block4835	3.368	*	95.2231	106.035		1885	11	5.172	Block5562	6.503	**	71.1	62.8494		323	2	31.36		0.09	367.931	0.2	2.54429		323	2	31.36		0	255.44	0	0.353707			2234	13	19.488	Block6703	4.306	**	3.28684	3.11558
1544	9	1.389	Block4842	11.833	*****	85.78	106.366		1886	11	5.368	Block5563	6.691	***	71.1	62.7024		324	2	31.685	Block1005	0.08	368.113	0.2	2.37917		324	2	31.685	Block1005	0	255.429	0	0.479017			2235	13	19.658	Block6704	4.306	**	3.29167	3.11558
1545	9	1.552	Block4843	9.771	****	87.3222	106.366		1887	11	5.64	Block5564	6.555	**	71.1	62.7963		325	2	32.685		0.07	368.14	0.2	2.2556		325	2	32.685		0	255.424	0	0.509246			2236	13	20.097	Block6705	4.222	**	3.29167	3.11632
1546	9	1.63	Block4846	9.426	****	87.6	105.978		1888	11	5.665	Block5565	7.185	***	71.2061	62.7963		326	2	33.685		0.06	368.2	0.2	2.1081		326	2	33.685		0.01	255.419	0	0.539043			2237	13	20.597	Block6706	4.306	**	3.29167	3.11558
1547	9	1.76	Block4847	8.541	****	87.0333	105.901		1889	11	5.829	Block5566	5.622	**	70.3647	62.9622		327	2	34.685		0.05	368.285	0.1	1.93718		327	2	34.685		0.01	255.414	0	0.572065			2238	13	20.953	Block6708	4.222	**	3.29167	3.11632
1548	9	1.793	Block4848	7.84	***	86.04	105.829		1890	11	5.983	Block5569	5.496	**	70.3057	63.1447		328	2	35.685		0.04	368.384	0.1	1.74459		328	2	35.685		0.01	255.41	0	0.60387			2239	13	21.01	Block6711	3.579	*	3.27632	3.11632
1549	9	2.152	Block4849	8.541	****	87.0333	105.901		1891	11	6.035	Block5572	4.989	**	70.3057	63.5578		329	2	36.685		0.03	368.486	0.1	1.53177		329	2	36.685		0.01	255.407	0	0.63596			2240	13	21.185	Block6712	4.314	**	3.2825	3.11448
1550	9	2.238	Block4850	7.809	***	86.04	105.901		1892	11	6.086	Block5576	5.189	**	70.3057	63.4025		330	2	37.685		0.02	368.58	0.1	1.30012		330	2	37.685		0.01	255.407	0	0.666871			2241	13	21.315	Block6714	3.562	*	3.28056	3.11686
1551	9	2.259	Block4851	8.541	****	87.0333	105.901		1893	11	6.125	Block5580	5.911	**	70.3057	62.8341		331	2	38.685		0.01	368.659	0	1.05277		331	2	38.685		0.01	255.408	0	0.698363			2242	13	21.356	Block6716	5.196	**	3.31562	3.11538
1552	9	2.352	Block4852	7.809	***	86.04	105.901		1894	11	6.773	Block5581	6.909	***	70.5389	62.7368		332	2	38.783	Block1006	0.01	368.665	0	1.02821		332	2	38.783	Block1006	0.01	255.408	0	0.701434			2243	13	21.466	Block6721	4.614	**	3.31562	3.13137
1553	9	2.406	Block4853	7.84	***	86.04	105.829		1895	11	6.931	Block5582	8.58	****	71.3371	62.614		333	2	39.004	Block1008	0.22	366.931	0.5	-6.41829		333	2	39.004	Block1008	0.69	251.418	1.6	-9.51518			2244	13	21.744	Block6726	6.423	**	3.28458	3.12904
1554	9	2.437	Block4854	5.885	**	90.2167	105.802		1896	11	6.985	Block5583	8.801	****	71.3371	62.5184		334	2	39.293	Block1010	0.29	366.288	0.7	-5.45321		334	2	39.293	Block1010	0.7	251.378	1.6	-6.99297			2246	13	21.864	Block6739	6.874	***	3.28458	3.11448
1555	9	3.513	Block4855	6.808	***	90.3286	105.879		1897	11	7.264	Block5591	3.899	**	66.3306	61.9969		335	2	39.477	Block1011	0.37	365.65	0.8	-5.06864		335	2	39.477	Block1011	0.25	253.994	0.6	-3.47099			2247	13	21.942	Block6742	6.537	**	3.28458	3.12536
1556	9	3.66	Block4856	5.875	**	90.2167	105.879		1898	11	7.342	Block5605	9.587	****	70.99	62.1384		336	2	39.828	Block1013	0.55	364.104	1.3	-6.19904		336	2	39.828	Block1013	0.37	253.269	0.9	-4.2453			2248	13	22.002	Block6745	6.726	***	3.28458	3.12355
1557	9	3.698	Block4857	6.808	***	90.3286	105.879		1899	11	7.425	Block5622	7.86	***	71.1794	62.6049		337	2	39.922	Block1015	0.38	365.505	0.9	-5.77082		337	2	39.922	Block1015	0.08	254.991	0.2	-2.17887			2249	13	22.072	Block6747	6.423	**	3.28458	3.12904
1558	9	3.773	Block4858	5.875	**	90.2167	105.879		1900	11	7.492	Block5624	13.411	******	73.5129	62.3257		338	2	40.061	Block1020	0.32	366.02	0.7	-4.05899		338	2	40.061	Block1020	0.26	253.901	0.6	-3.053			2250	13	22.185	Block6752	7.198	***	3.28458	3.11216
1559	9	3.811	Block4859	5.885	**	90.2167	105.802		1901	11	7.646	Block5626	14.506	******	75.336	62.4503		339	2	40.359	Block1024	0.14	367.576	0.3	-2.19218		339	2	40.359	Block1024	0.18	254.404	0.4	-2.05937			2251	13	22.278	Block6754	7.338	***	3.28458	3.10811
1561	9	5.231	Block4862	3.768	*	95.2667	105.753		1902	11	8.102	Block5634	14.522	******	75.336	62.4157		340	2	40.456	Block1025	0.02	368.581	0.1	-0.731503		340	2	40.456	Block1025	0.02	255.351	0	-0.547624			2252	13	22.349	Block6755	7.369	***	3.2812	3.10811
1562	9	5.468	Block4865	5.885	**	90.2167	105.802		1903	11	8.192	Block5653	7.253	***	66.6901	61.083		341	2	40.555	Block1026	0.03	368.47	0.1	-0.904142		341	2	40.555	Block1026	0.04	255.232	0.1	-0.783952			2253	13	22.453	Block6758	3.435	*	3.23	3.11974
1563	9	28.384	Block4866	3.872	**	97.0846	105.908		1904	11	8.277	Block5659	7.413	***	66.754	61.0747		342	2	40.625	Block1027	0.03	368.484	0.1	-0.879593		342	2	40.625	Block1027	0.03	255.258	0.1	-0.733242			2254	13	22.654	Block6759	3.435	*	3.23	3.11974
1569	9	33.874	Block4903	3.561	*	99.1586	106.281		1905	11	8.482	Block5662	6.643	***	66.1933	61.0067		343	2	40.807	Block1029	0.01	368.689	0	-0.485484		343	2	40.807	Block1029	0.09	254.901	0.2	-1.28601			2255	13	22.758	Block6760	3.401	*	3.23	3.12059
1571	9	33.997	Block4918	3.702	*	99.1586	106.385		1906	11	8.551	Block5683	6.643	***	66.1933	61.0067		344	2	40.898	Block1030	0	368.754	0	-0.206965		344	2	40.898	Block1030	0.09	254.924	0.2	-1.2906			2256	13	23.02	Block6762	3.968	**	3.23773	3.12086
1572	9	34.019	Block4919	3.9	**	99.1586	106.53		1907	11	8.582	Block5684	7.287	***	66.3379	60.8989		345	2	40.974	Block1033	0.01	368.701	0	-0.454145		345	2	40.974	Block1033	0.15	254.55	0.4	-1.66863			2257	13	23.065	Block6765	3.906	**	3.23773	3.12143
1573	9	34.121	Block4921	3.9	**	99.1586	106.53		1908	11	8.637	Block5699	11.964	*****	75.1304	62.5763		346	2	41.159	Block1035	0.03	368.544	0.1	-0.874301		346	2	41.159	Block1035	0.23	254.075	0.5	-2.17285			2258	13	23.145	Block6766	4.043	**	3.23773	3.11926
1574	9	34.181	Block4922	3.702	*	99.1586	106.385		1909	11	8.757	Block5700	13.133	******	75.2583	62.5763		347	2	41.189	Block1036	0	368.767	0	-0.0695126		347	2	41.189	Block1036	0.11	254.82	0.2	-1.51937			2259	13	23.537	Block6769	4.336	**	3.23444	3.11531
1587	9	36.698	Block4964	4.815	**	98.0536	106.385		1910	11	8.888	Block5708	9.495	****	72.4862	62.3703		348	2	41.346	Block1038	0.26	366.545	0.6	-2.68249		348	2	41.346	Block1038	0.68	251.495	1.6	-3.58019			2260	13	23.607	Block6770	5.872	**	3.25783	3.11531
1590	9	37.002	Block4976	3.872	**	97.0846	105.908		1911	11	8.932	Block5721	5.842	**	65.998	61.25		349	2	41.585	Block1041	0.02	368.581	0.1	-0.720434		349	2	41.585	Block1041	0.15	254.588	0.3	-1.55176			2261	13	23.642	Block6772	5.894	**	3.26333	3.11644
1612	9	43.708	Block5016	2.829	*	113.04	104.614		1912	11	8.983	Block5725	6.618	**	66.4	61.25		350	2	41.702	Block1042	0.07	368.161	0.2	-1.32742		350	2	41.702	Block1042	0.29	253.722	0.7	-2.2432			2262	13	23.947	Block6774	4.254	**	3.2372	3.11644
1614	9	43.844	Block5021	2.762	*	113.04	104.686		1913	11	9.016	Block5728	5.91	**	66.1061	61.343		351	2	41.803	Block1046	0.03	368.5	0.1	-0.881044		351	2	41.803	Block1046	0.17	254.478	0.4	-1.68451			2263	13	23.977	Block6776	3.327	*	3.22625	3.119
1615	9	43.962	Block5022	2.829	*	113.04	104.614		1914	11	9.18	Block5772	4.544	**	65.9155	61.9351		352	2	41.874	Block1050	0.11	367.834	0.3	2.01286		352	2	41.874	Block1050	0.03	255.266	0.1	0.906991			2264	13	24.051	Block6778	4.755	**	3.2515	3.119
1616	9	44.082	Block5023	2.938	*	113.04	104.486		1915	11	9.247	Block5775	5.359	**	66.04	61.6455		353	2	42.422	Block1051	0.13	367.68	0.3	2.19131		353	2	42.422	Block1051	0.04	255.197	0.1	1.06954			2265	13	24.238	Block6780	4.814	**	3.2515	3.11851
1617	9	44.298	Block5024	2.829	*	113.04	104.594		1916	11	9.277	Block5776	5.116	**	66.04	61.7378		354	2	42.493	Block1062	0.01	368.712	0	0.45507		354	2	42.493	Block1062	0.05	255.156	0.1	-1.04923			2266	13	24.395	Block6781	4.916	**	3.2513	3.11589
1621	9	45.178	Block5028	3.661	*	113	104.295		1917	11	9.303	Block5778	4.973	**	65.901	61.6938		355	2	42.668	Block1063	0.01	368.642	0	0.675822		355	2	42.668	Block1063	0.03	255.251	0.1	-0.862805			2267	13	24.489	Block6782	3.73	*	3.23545	3.11908
1622	9	45.43	Block5029	3.789	*	113	104.182		1918	11	9.382	Block5793	9.928	****	75.6	62.967		356	2	42.759	Block1069	0.12	367.751	0.3	2.02214		356	2	42.759	Block1069	0.01	255.423	0	0.360827			2269	13	24.67	Block6785	3.533	*	3.23545	3.12313
1636	9	47.083	Block5065	5.3	**	112.543	104.037		1919	11	9.423	Block5794	11.761	*****	76.9529	62.967		357	2	42.967	Block1075	0	368.767	0	-0.0401207		357	2	42.967	Block1075	0.09	254.898	0.2	-1.43171			2270	13	24.705	Block6786	3.73	*	3.23545	3.11908
1637	9	47.271	Block5069	4.162	**	110.646	103.913		1920	11	9.528	Block5796	10.206	****	75.8	62.9094		358	2	43.026	Block1076	0.01	368.655	0	0.637055		358	2	43.026	Block1076	0.03	255.254	0.1	-0.852315			2271	13	25.435	Block6787	3.675	*	3.239	3.12013
1638	9	47.419	Block5070	4.838	**	111.164	103.913		1921	11	9.936	Block5798	8.589	****	74.7882	62.8906		359	2	43.228	Block1079	0.01	368.719	0	0.42752		359	2	43.228	Block1079	0.03	255.263	0.1	-0.851341			2272	13	25.843	Block6792	3.237	*	3.2215	3.12059
1639	9	47.467	Block5071	4.162	**	110.646	103.913		1922	11	10.03	Block5800	8.306	****	74.7882	63.0757		360	2	43.375	Block1081	0	368.76	0	-0.17055		360	2	43.375	Block1081	0.08	255.01	0.2	-1.25774			2273	13	26.045	Block6796	2.782	*	3.20958	3.12075
1640	9	47.563	Block5072	3.993	**	110.646	104.037		1923	11	10.089	Block5802	5.178	**	73.2333	63.3311		361	2	43.533	Block1088	0.13	367.68	0.3	2.19131		361	2	43.533	Block1088	0.04	255.197	0.1	1.06954			2274	13	26.287	Block6797	2.717	*	3.21	3.12075
1644	9	47.83	Block5079	3.111	*	111.887	104.565		1924	11	10.116	Block5804	5.073	**	73.2333	63.4055		362	2	43.777	Block1091	0.21	366.983	0.5	2.64471		362	2	43.777	Block1091	0.09	254.911	0.2	1.4614			2275	13	26.344	Block6801	3.183	*	3.22263	3.12059
1645	9	47.963	Block5082	3.031	*	111.248	104.565		1953	11	26.199	Block5866	3.23	*	51.58	64.4722		363	2	43.798	Block1092	0.21	366.974	0.5	2.6332		363	2	43.798	Block1092	0.1	254.87	0.2	1.5046			2276	13	26.553	Block6802	2.988	*	3.22263	3.1237
1646	9	48.016	Block5087	3.959	**	112.004	104.366		1968	11	30.498	Block5897	3.23	*	51.58	64.4722		364	2	43.852	Block1094	0	368.745	0	0.283582		364	2	43.852	Block1094	0.03	255.279	0.1	-0.784239			2277	13	26.713	Block6807	6.16	**	3.36111	3.12139
1793	10	42.312	Block5366	2.858	*	126.4	105.118		1970	11	31.478	Block5899	3.23	*	51.58	64.4722		365	2	43.883	Block1096	0	368.764	0	0.107238		365	2	43.883	Block1096	0.04	255.224	0.1	-0.880799			2296	13	28.374	Block6863	3.935	**	2.945	3.15568
1794	10	42.812	Block5367	5.512	**	122.98	104.877		1971	11	31.869	Block5904	3.977	**	57.5696	65.008		366	2	43.935	Block1097	0	368.764	0	0.107238		366	2	43.935	Block1097	0.04	255.224	0.1	-0.880799			2303	13	28.855	Block6884	3.817	*	2.99211	3.15147
1795	10	42.893	Block5368	4.814	**	127.733	104.877		1972	11	32.279	Block5905	3.484	*	57.7955	65.008		367	2	44.007	Block1102	0.13	367.693	0.3	-2.15247		367	2	44.007	Block1102	0.14	254.621	0.3	-1.8972			2310	13	29.301	Block6913	5.09	**	2.94333	3.15245
1796	10	43.116	Block5369	2.904	*	126.4	104.877		1988	11	33.964	Block5990	3.366	*	83	63.924		368	2	44.052	Block1104	0.19	367.14	0.4	-2.68947		368	2	44.052	Block1104	0.17	254.475	0.4	-2.08825			2311	13	29.354	Block6914	5.424	**	2.94687	3.15245
1797	10	43.169	Block5371	2.887	*	126.4	105.054		1989	11	34.03	Block5992	3.175	*	78.0833	63.8921		369	2	44.21	Block1106	0.02	368.581	0.1	-0.990284		369	2	44.21	Block1106	0.02	255.35	0	-0.747664			2312	13	29.399	Block6917	4.753	**	2.93929	3.15245
1798	10	43.307	Block5372	2.874	*	126.4	105.224		1991	11	34.167	Block5995	3.175	*	78.0833	63.822		370	2	44.235	Block1107	0.07	368.149	0.2	-1.72619		370	2	44.235	Block1107	0.13	254.689	0.3	-1.92087			2313	13	29.534	Block6923	4.412	**	2.93462	3.15245
1799	10	43.602	Block5374	2.964	*	126.4	104.98		1992	11	34.269	Block6008	3.229	*	78.0833	63.9203		371	2	44.256	Block1108	0.11	367.82	0.3	-2.11806		371	2	44.256	Block1108	0.18	254.41	0.4	-2.22421			2314	13	29.565	Block6925	3.543	*	2.97812	3.15245
1857	11	2.101	Block5495	2.711	*	100.48	106.591		2032	12	3.912	Block6141	2.858	*	68.5167	63.4162		372	2	44.409	Block1120	0.44	364.992	1	4.88028		372	2	44.409	Block1120	1.12	248.9	2.6	6.43089			2315	13	29.656	Block6947	3.547	*	2.99167	3.15245
1858	11	2.151	Block5496	3.532	*	100.033	106.749		2040	12	4.616	Block6160	3.754	*	69.781	63.4616		373	2	44.448	Block1121	0.56	363.99	1.3	5.5641		373	2	44.448	Block1121	1.47	246.919	3.3	7.43737			2316	13	29.699	Block6949	2.775	*	3.00294	3.15245
1859	11	2.265	Block5500	5.744	**	98.8756	107.264		2041	12	4.686	Block6162	3.851	**	69.781	63.3886		374	2	44.57	Block1122	0.89	361.285	2	6.58184		374	2	44.57	Block1122	1.62	246.029	3.7	7.38778			2318	13	29.904	Block6960	3.862	**	2.99211	3.15245
1860	11	2.428	Block5501	5.834	**	98.4816	107.264		2042	12	4.729	Block6164	3.754	*	69.781	63.4616		375	2	44.698	Block1124	1.59	355.419	3.6	8.40888		375	2	44.698	Block1124	1.93	244.273	4.4	7.69644			2319	13	29.959	Block6962	5.301	**	2.96389	3.15245
1862	11	2.541	Block5509	4.814	**	99.2	107.161		2043	12	4.806	Block6167	3.391	*	69.781	63.8644		376	2	44.744	Block1127	1.28	357.99	2.9	7.76554		376	2	44.744	Block1127	0.85	250.508	1.9	5.26146			2320	13	30.014	Block6965	7.006	***	2.92188	3.15245
1863	11	2.604	Block5512	3.691	*	99.4091	107.047		2044	12	4.866	Block6170	5.002	**	71.1842	63.788		377	2	44.795	Block1136	0.34	365.866	0.8	3.39439		377	2	44.795	Block1136	0.07	255.016	0.2	1.32111			2321	13	30.075	Block6970	4.965	**	2.82143	3.15245
1864	11	2.664	Block5513	3.136	*	99.6406	106.954		2045	12	4.963	Block6171	5.009	**	71.1842	63.7745		378	2	44.892	Block1137	0.34	365.866	0.8	3.39439		378	2	44.892	Block1137	0.07	255.016	0.2	1.32111			2322	13	30.125	Block6978	5.153	**	2.96176	3.15245
1937	11	12.95	Block5837	3.028	*	98.8143	106.116		2046	12	5.011	Block6172	5.145	**	71.1842	63.603		379	2	44.995	Block1147	0.13	367.684	0.3	2.51652		379	2	44.995	Block1147	0.06	255.108	0.1	-1.42544			2352	13	34.463	Block7059	10.217	****	2.85938	3.15943
1938	11	13.606	Block5838	3.082	*	98.8143	106.202		2047	12	5.101	Block6175	5.403	**	71.1842	63.3832		380	2	45.077	Block1148	0.08	368.052	0.2	1.9683		380	2	45.077	Block1148	0.1	254.871	0.2	-1.77841			2354	13	34.577	Block7068	8.856	****	2.77222	3.15394
1950	11	24.41	Block5859	2.96	*	92.9429	105.783		2048	12	5.61	Block6176	5.403	**	71.1842	63.3832		381	2	45.256	Block1175	0.28	366.38	0.6	3.06042		381	2	45.256	Block1175	0	255.45	0	-0.154367			2355	13	34.686	Block7071	8.768	****	2.77222	3.15262
1952	11	26.041	Block5864	4.164	**	81.7333	105.693		2049	12	5.684	Block6177	5.179	**	71.2611	63.4189		382	2	45.282	Block1180	0.71	362.743	1.6	5.50456		382	2	45.282	Block1180	0.24	254.068	0.5	2.64201			2368	13	41.984	Block7093	5.703	**	2.925	3.15236
1953	11	26.199	Block5866	3.759	*	88.74	105.759		2050	12	5.88	Block6178	5.179	**	71.2611	63.4189		383	2	45.369	Block1183	0.49	364.571	1.1	4.92933		383	2	45.369	Block1183	0.13	254.674	0.3	2.12766			2369	13	42.089	Block7094	5.728	**	2.925	3.15331
1968	11	30.498	Block5897	2.94	*	90.6	105.711		2051	12	5.921	Block6180	7.634	***	73.82	63.3377		384	2	45.516	Block1197	0.26	366.516	0.6	3.09306		384	2	45.516	Block1197	0	255.449	0	-0.166263			2370	13	42.122	Block7095	6.079	**	2.93	3.15331
1970	11	31.478	Block5899	2.94	*	90.6	105.711		2052	12	6.206	Block6181	7.645	***	73.82	63.3598		385	2	45.568	Block1206	0.31	366.126	0.7	3.86514		385	2	45.568	Block1206	0.05	255.176	0.1	1.25855			2371	13	42.517	Block7097	5.332	**	2.91923	3.15142
1988	11	33.964	Block5990	4.531	**	128.4	105.201		2053	12	6.365	Block6182	9.489	****	75.3357	63.3016		386	2	45.632	Block1222	0.49	364.571	1.1	4.92933		386	2	45.632	Block1222	0.13	254.674	0.3	2.12766			2373	13	43.09	Block7101	4.989	**	3.53333	3.12488
1989	11	34.03	Block5992	3.072	*	120.917	105.095		2054	12	6.599	Block6183	9.483	****	74.8067	63.1918		387	2	45.663	Block1225	1.2	358.683	2.7	7.1637		387	2	45.663	Block1225	0.28	253.779	0.7	2.92138			2374	13	43.158	Block7104	3.899	**	3.33	3.11982
1991	11	34.167	Block5995	3.149	*	120.917	104.946		2055	12	6.66	Block6184	10.41	****	74.7938	63.1291		388	2	45.704	Block1226	0.49	364.571	1.1	4.92933		388	2	45.704	Block1226	0.13	254.674	0.3	2.12766			2375	13	43.435	Block7105	3.817	*	3.33	3.12302
1992	11	34.269	Block6008	3.071	*	120.917	105.016		2056	12	6.693	Block6185	10.299	****	74.7938	63.1873		389	2	45.752	Block1228	0.6	363.703	1.4	5.29222		389	2	45.752	Block1228	0.15	254.584	0.3	2.19603			2376	13	43.535	Block7106	3.899	**	3.33	3.11982
1993	11	34.312	Block6014	2.826	*	116.8	104.928		2057	12	6.727	Block6186	10.41	****	74.7938	63.1291		390	2	45.811	Block1238	1.03	360.111	2.3	6.51373		390	2	45.811	Block1238	0.18	254.41	0.4	2.2645			2377	13	43.918	Block7107	3.877	**	3.33	3.12061
1997	11	34.613	Block6042	3.721	*	117.143	104.887		2058	12	6.793	Block6188	13.226	******	76.7	62.8856		391	2	45.87	Block1245	0.55	364.122	1.3	4.74243		391	2	45.87	Block1245	0.05	255.182	0.1	1.15172			2511	14	42.725	Block7540	3.643	*	3.29222	3.11982
2011	12	1.368	Block6081	3.103	*	112.035	105.012		2059	12	6.892	Block6191	8.977	****	75.7429	63.2708		392	2	45.97	Block1254	0.54	364.163	1.2	4.76608		392	2	45.97	Block1254	0.07	255.048	0.2	1.41765			2512	14	42.847	Block7542	3.643	*	3.29222	3.11982
2025	12	2.694	Block6117	3.7	*	113.464	104.821		2060	12	7.133	Block6192	8.883	****	75.7429	63.3288		393	2	45.993	Block1258	0.58	363.828	1.3	4.72338		393	2	45.993	Block1258	0.03	255.26	0.1	0.940739			2513	14	43.975	Block7543	3.632	*	3.29222	3.11933
2026	12	2.78	Block6118	3.721	*	113.464	104.752		2061	12	7.215	Block6195	6.694	***	73.0412	63.3176		394	2	46.086	Block1266	0.3	366.201	0.7	3.5052		394	2	46.086	Block1266	0.06	255.115	0.1	1.27836			2521	14	45.811	Block7574	3.237	*	3.00833	3.14471
2027	12	2.921	Block6122	3.887	**	113.464	104.492		2062	12	7.281	Block6197	6.526	**	72.095	63.2603		395	2	46.136	Block1268	0.01	368.659	0	-0.54845		395	2	46.136	Block1268	0.34	253.455	0.8	2.35229			2522	14	45.881	Block7577	4.701	**	2.99318	3.15053
2028	12	2.951	Block6123	4.639	**	114.608	104.456		2063	12	7.317	Block6199	7.899	****	73.1211	63.2011		396	2	46.569	Block1280	0.02	368.568	0.1	-0.707554		396	2	46.569	Block1280	0.31	253.616	0.7	2.14801			2523	14	45.952	Block7579	3.622	*	3.01522	3.15287
2053	12	6.365	Block6182	2.798	*	112.657	104.777		2064	12	7.474	Block6200	6.526	**	72.095	63.2603		397	2	46.613	Block1286	0.14	367.554	0.3	-1.70264		397	2	46.613	Block1286	0.06	255.119	0.1	0.897395			2524	14	46.054	Block7581	2.995	*	3.01667	3.15287
2099	12	13.097	Block6259	4.068	**	97.8789	106.118		2065	12	7.609	Block6201	7.899	****	73.1211	63.2011		398	2	46.653	Block1295	0.03	368.481	0.1	-0.853351		398	2	46.653	Block1295	0.28	253.794	0.7	2.05538			2573	15	4.12	Block7684	7.179	***	2.88077	3.14862
2100	12	15.571	Block6260	3.304	*	98.74	106.068		2066	12	7.942	Block6203	7.899	****	73.1211	63.2011		399	2	46.742	Block1310	0.13	367.702	0.3	-1.60888		399	2	46.742	Block1310	0.07	255.035	0.2	1.01111			2574	15	4.304	Block7685	5.395	**	2.90417	3.14522
2101	12	21.219	Block6262	5.024	**	96.6235	106.145		2067	12	7.979	Block6204	11.058	*****	74.0476	62.9803		400	2	46.804	Block1311	0.05	368.311	0.1	-1.03527		400	2	46.804	Block1311	0.21	254.239	0.5	1.68869			2575	15	4.356	Block7687	4.233	**	2.925	3.14098
2102	12	21.696	Block6269	3.028	*	98.8143	106.116		2068	12	8.002	Block6205	11.042	*****	74.0476	62.9554		401	2	46.886	Block1315	0	368.748	0	0.218905		401	2	46.886	Block1315	0.57	252.127	1.3	2.80121			2576	15	4.501	Block7688	3.574	*	2.90625	3.13927
2103	12	31.942	Block6270	4.666	**	96.9842	106.228		2069	12	8.034	Block6206	11.058	*****	74.0476	62.9803		402	2	47.069	Block1319	0.08	368.123	0.2	-1.07768		402	2	47.069	Block1319	0.02	255.349	0	0.438852			2677	15	23.895	Block7931	4.282	**	2.99393	3.15651
2104	12	32.077	Block6271	4.67	**	96.9842	106.24		2070	12	8.093	Block6211	6.481	**	70.76	62.9746		403	2	47.127	Block1345	0	368.763	0	-0.0822786		403	2	47.127	Block1345	0.03	255.281	0.1	0.516912			2678	15	23.956	Block7936	4.282	**	2.99393	3.15651
2105	12	32.337	Block6275	7.593	***	94.0133	106.254		2071	12	8.427	Block6215	5.335	**	70.3379	63.0669		404	2	47.218	Block1369	0	368.764	0	-0.0943434		404	2	47.218	Block1369	0.19	254.358	0.4	1.54262			2679	15	24.017	Block7937	4.282	**	2.99393	3.15651
2106	12	33.003	Block6276	7.712	***	94.0133	106.352		2072	12	8.467	Block6216	5.326	**	70.3379	63.0924		405	2	47.249	Block1372	0.01	368.695	0	0.386996		405	2	47.249	Block1372	0.25	253.986	0.6	1.73846			2684	15	24.637	Block7957	3.91	**	2.9937	3.15514
2107	12	33.038	Block6277	7.593	***	94.0133	106.254		2073	12	9.006	Block6218	8.015	****	72.6414	62.6994		406	2	47.289	Block1373	0	368.734	0	0.265548		406	2	47.289	Block1373	0.23	254.116	0.5	1.68005			2685	15	24.729	Block7958	3.91	**	2.9937	3.15514
2108	12	33.237	Block6279	8.108	****	93.25	106.388		2074	12	9.166	Block6221	7.885	****	72.6414	62.7592		407	2	47.33	Block1375	0	368.764	0	-0.0943434		407	2	47.33	Block1375	0.19	254.358	0.4	1.54262			2686	15	24.776	Block7959	3.91	**	2.9937	3.15514
2109	12	34.455	Block6283	7.825	***	93.25	106.187		2075	12	9.214	Block6223	7.885	****	72.6414	62.7592		408	2	47.452	Block1379	0	368.764	0	-0.0943434		408	2	47.452	Block1379	0.19	254.358	0.4	1.54262			2688	15	25.231	Block7971	3.91	**	2.9937	3.15514
2110	12	34.557	Block6285	8.108	****	93.25	106.388		2076	12	9.263	Block6224	8.015	****	72.6414	62.6994		409	2	47.499	Block1386	0	368.763	0	-0.0822786		409	2	47.499	Block1386	0.03	255.281	0.1	0.516912			2689	15	25.399	Block7972	3.937	**	2.9937	3.15544
2111	12	34.68	Block6286	8.012	****	93.25	106.343		2077	12	9.348	Block6225	9.575	****	73.2167	62.5385		410	2	47.539	Block1391	0	368.739	0	0.232352		410	2	47.539	Block1391	0.19	254.331	0.4	1.45526			2690	15	25.474	Block7973	2.708	*	3.0225	3.15544
2112	12	34.734	Block6287	8.108	****	93.25	106.388		2078	12	9.854	Block6226	9.435	****	73.2167	62.5976		411	2	47.572	Block1394	0.04	368.412	0.1	0.833097		411	2	47.572	Block1394	0.57	252.099	1.3	2.56017			2691	15	25.58	Block7974	3.937	**	2.9937	3.15544
2113	12	34.771	Block6288	8.245	****	93.25	106.487		2079	12	9.924	Block6227	9.575	****	73.2167	62.5385		412	2	47.663	Block1406	0.01	368.645	0	0.513583		412	2	47.663	Block1406	0.46	252.775	1	2.39929			2692	15	27.312	Block7975	3.644	*	2.99346	3.15544
2114	12	34.852	Block6289	9.421	****	92.9647	106.487		2080	12	10.07	Block6228	9.435	****	73.2167	62.5976		413	2	47.7	Block1412	0.02	368.617	0	0.535301		413	2	47.7	Block1412	0.41	253.064	0.9	2.13223			2693	15	27.523	Block7976	3.937	**	2.9937	3.15544
2115	12	34.994	Block6292	8.963	****	91.8286	106.354		2081	12	10.204	Block6229	9.575	****	73.2167	62.5385		414	2	47.742	Block1415	0	368.762	0	-0.118747		414	2	47.742	Block1415	0.39	253.185	0.9	2.27349			2694	15	30.754	Block7977	3.91	**	2.9937	3.15514
2116	12	35.057	Block6293	7.71	***	92.0923	106.354		2082	12	10.325	Block6230	9.435	****	73.2167	62.5976		415	2	47.787	Block1418	0	368.758	0	0.145528		415	2	47.787	Block1418	0.41	253.034	0.9	2.30553			2695	15	30.941	Block7978	3.937	**	2.9937	3.15544
2117	12	35.084	Block6294	8.963	****	91.8286	106.354		2083	12	10.4	Block6231	9.575	****	73.2167	62.5385		416	2	47.856	Block1421	0	368.748	0	-0.212033		416	2	47.856	Block1421	0.39	253.18	0.9	2.26317			2698	15	32.724	Block8007	3.91	**	2.9937	3.15514
2118	12	35.429	Block6295	10.793	****	90.0385	106.401		2084	12	10.502	Block6232	8.373	****	72.5516	62.5976		417	2	47.911	Block1428	0.02	368.593	0	0.581761		417	2	47.911	Block1428	0.47	252.681	1.1	2.31887			2699	15	32.803	Block8008	3.937	**	2.9937	3.15544
2119	12	35.596	Block6296	9.355	****	90.175	106.304		2085	12	10.603	Block6233	9.575	****	73.2167	62.5385		418	2	47.987	Block1438	0.08	368.049	0.2	-1.02078		418	2	47.987	Block1438	0	255.454	0	-0.052745			2700	15	32.865	Block8009	3.91	**	2.9937	3.15514
2120	12	35.628	Block6297	7.181	***	92.3818	106.089		2086	12	10.629	Block6235	9.575	****	73.2167	62.5385		419	2	48.072	Block1442	0.08	368.049	0.2	-1.02078		419	2	48.072	Block1442	0	255.454	0	-0.052745			2701	15	32.901	Block8010	3.937	**	2.9937	3.15544
2121	12	35.982	Block6298	7.212	***	92.3818	106.165		2087	12	10.859	Block6237	8.373	****	72.5516	62.5976		420	2	48.145	Block1443	0.15	367.507	0.3	-1.36274		420	2	48.145	Block1443	0.03	255.285	0.1	-0.501499			2703	15	33.047	Block8015	3.997	**	2.95167	3.15544
2122	12	36.019	Block6299	7.181	***	92.3818	106.089		2088	12	11.135	Block6238	9.435	****	73.2167	62.5976		421	2	48.301	Block1444	0.16	367.393	0.4	-1.41198		421	2	48.301	Block1444	0.03	255.278	0.1	-0.507985			2704	15	33.134	Block8016	3.658	*	2.94882	3.15544
2123	12	36.36	Block6303	5.352	**	94.975	106.572		2089	12	11.187	Block6239	9.22	****	73.2167	62.7413		422	3	0.002	Block1445	0.01	368.72	0	-0.314508		422	3	0.002	Block1445	0.02	255.357	0	0.451523			2711	15	35.102	Block8032	2.708	*	3.0225	3.15544
2124	12	36.519	Block6304	5.174	**	94.975	106.382		2090	12	11.227	Block6240	9.435	****	73.2167	62.5976		423	3	0.243	Block1447	0	368.756	0	-0.155318		423	3	0.243	Block1447	0.03	255.275	0.1	0.616332			2712	15	35.124	Block8033	2.909	*	3.01593	3.15544
2125	12	36.571	Block6308	4.91	**	94.975	105.996		2091	12	11.308	Block6242	9.435	****	73.2167	62.5976		424	3	0.276	Block1450	0.04	368.395	0.1	0.868439		424	3	0.276	Block1450	0.09	254.94	0.2	1.02193			2724	15	37.059	Block8079	3.61	*	3.00481	3.15544
2126	12	36.914	Block6311	5.175	**	94.975	106.194		2092	12	11.463	Block6243	8.373	****	72.5516	62.5976		425	3	0.347	Block1451	0.03	368.511	0.1	0.719849		425	3	0.347	Block1451	0.07	255.053	0.2	0.900952			2738	15	40.379	Block8113	3.457	*	3.00115	3.15544
2127	12	37.019	Block6314	4.91	**	94.975	105.996		2093	12	11.502	Block6245	9.575	****	73.2167	62.5385		426	3	0.416	Block1455	0	368.756	0	0.148684		426	3	0.416	Block1455	0.02	255.332	0	0.482963			2743	15	40.629	Block8128	2.708	*	3.0225	3.15544
2128	12	37.644	Block6315	5.101	**	94.975	106.253		2094	12	11.673	Block6247	5.488	**	73.3	62.9523		427	3	0.504	Block1457	0.05	368.365	0.1	0.842054		427	3	0.504	Block1457	0.08	254.996	0.2	0.899147			2746	15	40.776	Block8137	2.708	*	3.0225	3.15544
2129	12	37.697	Block6316	6.07	**	94.6385	106.338		2095	12	12.604	Block6248	5.538	**	73.3	62.9017		428	3	0.551	Block1459	0.12	367.764	0.3	1.35721		428	3	0.551	Block1459	0.15	254.585	0.3	1.26397			2753	15	41.471	Block8154	2.708	*	3.0225	3.15544
2130	12	37.765	Block6318	8.394	****	92.2333	106.359		2096	12	12.649	Block6249	5.916	**	73.2375	62.9017		429	3	0.625	Block1464	0.02	368.575	0.1	0.575371		429	3	0.625	Block1464	0.05	255.188	0.1	0.679312			2763	15	42.739	Block8174	2.708	*	3.0225	3.15544
2131	12	37.812	Block6321	8.221	****	92.2333	106.172		2097	12	12.674	Block6251	4.766	**	72.412	63.0767		430	3	0.701	Block1465	0.02	368.575	0.1	0.575371		430	3	0.701	Block1465	0.05	255.188	0.1	0.679312			2765	15	43.134	Block8180	2.748	*	3.0225	3.15651
2132	12	37.921	Block6323	7.856	***	90.4625	106.134		2098	12	12.818	Block6256	5.488	**	73.3	62.9523		431	3	0.746	Block1468	0.2	367.095	0.5	2.0549		431	3	0.746	Block1468	0.9	250.211	2.1	3.63885			2766	15	43.172	Block8184	4.593	**	2.97087	3.15651
2133	12	38.034	Block6324	7.637	***	90.4625	105.954		2123	12	36.36	Block6303	3.244	*	74.8167	63.9403		432	3	0.836	Block1469	0.18	367.207	0.4	2.01789		432	3	0.836	Block1469	0.77	250.948	1.8	3.42956			2767	15	43.223	Block8186	4.593	**	2.97087	3.15651
2134	12	38.082	Block6327	7.487	***	90.4625	105.756		2124	12	36.519	Block6304	3.325	*	74.8167	63.783		433	3	0.859	Block1470	0.28	366.344	0.7	2.55789		433	3	0.859	Block1470	0.62	251.839	1.4	3.12482			2768	15	43.44	Block8187	4.915	**	2.97208	3.15651
2135	12	38.185	Block6329	7.637	***	90.4625	105.954		2125	12	36.571	Block6308	3.437	*	74.8167	63.4636		434	3	1.006	Block1471	0.32	366.054	0.7	2.76675		434	3	1.006	Block1471	0.48	252.623	1.1	2.82657			2769	15	43.53	Block8189	4.836	**	2.97208	3.15439
2136	12	38.259	Block6332	8.076	****	90.4625	106.283		2126	12	36.914	Block6311	3.306	*	74.8167	63.8678		435	3	1.562	Block1472	0.45	364.975	1	3.34733		435	3	1.562	Block1472	0.64	251.675	1.5	3.34218			2784	15	48.853	Block8226	3.287	*	2.95158	3.15195
2137	12	38.326	Block6335	10.091	****	88.4	106.283		2127	12	37.019	Block6314	3.437	*	74.8167	63.4636		436	3	1.901	Block1481	0.01	368.712	0	0.422305		436	3	1.901	Block1481	0	255.455	0	0.0648166			2785	15	48.892	Block8228	3.62	*	2.954	3.15294
2138	12	38.392	Block6336	10.061	****	88.4	106.281		2128	12	37.644	Block6315	3.357	*	74.8167	63.6726		437	3	2.024	Block1486	0.01	368.64	0	0.605109		437	3	2.024	Block1486	0.01	255.409	0	-0.367412			2786	15	48.989	Block8229	4.761	**	2.93053	3.15455
2139	12	38.424	Block6339	6.311	**	96.5444	106.281		2129	12	37.697	Block6316	3.564	*	74.4308	63.6395		438	3	2.053	Block1487	0.03	368.53	0.1	0.841847		438	3	2.053	Block1487	0	255.441	0	-0.208619			2787	15	49.106	Block8236	4.332	**	2.9175	3.15287
2140	12	38.473	Block6342	7.209	***	94.9562	106.172		2148	12	39.068	Block6362	2.949	*	59.2125	65.0012		439	3	2.244	Block1506	0.05	368.356	0.1	1.04591		439	3	2.244	Block1506	0.01	255.386	0	-0.43209			2794	15	49.772	Block8257	4.845	**	2.97	3.15436
2141	12	38.557	Block6347	8.004	****	90.4625	106.174		2149	12	39.16	Block6363	3.089	*	59.2125	65.1415		440	3	2.971	Block1512	0.72	362.688	1.6	3.75279		440	3	2.971	Block1512	0.02	255.359	0	0.473818			2795	15	50.111	Block8261	5.797	**	2.93714	3.15395
2142	12	38.645	Block6350	6.059	**	95.6308	106.128		2158	12	39.738	Block6389	3.429	*	58.9615	64.9277		441	3	3.045	Block1515	0.31	366.105	0.7	2.53159		441	3	3.045	Block1515	0.01	255.396	0	-0.38041			2843	16	4.751	Block8399	4.445	**	3.33636	3.12193
2143	12	38.714	Block6351	6.06	**	95.6308	106.205		2159	12	39.813	Block6399	3.59	*	58.9615	65.0576		442	3	3.318	Block1516	0.26	366.523	0.6	2.29112		442	3	3.318	Block1516	0.02	255.347	0	-0.505291			2844	16	4.919	Block8402	5.62	**	3.37	3.12193
2144	12	38.77	Block6354	4.687	**	98.3762	106.232		2160	12	39.904	Block6400	3.429	*	58.9615	64.9277		443	3	3.404	Block1518	0.22	366.903	0.5	2.05962		443	3	3.404	Block1518	0.01	255.376	0	-0.426777			2845	16	5.028	Block8403	5.697	**	3.37	3.12117
2145	12	38.907	Block6355	4.871	**	98.3762	106.371		2161	12	39.94	Block6401	3.59	*	58.9615	65.0576		444	3	3.536	Block1519	0.3	366.178	0.7	2.46707		444	3	3.536	Block1519	0	255.444	0	-0.168291			2846	16	5.166	Block8404	5.913	**	3.37	3.11727
2146	12	38.965	Block6358	5.752	**	97.1684	106.232		2162	12	39.983	Block6402	2.829	*	59.428	65.0576		445	3	3.607	Block1526	0.41	365.282	0.9	2.85519		445	3	3.607	Block1526	0	255.455	0	0.0470296			2847	16	5.365	Block8405	6.037	**	3.37	3.11487
2147	12	39.032	Block6360	4.687	**	98.3762	106.232		2163	13	0.013	Block6403	6.405	**	67.0565	61.6606		446	3	3.7	Block1534	0.07	368.15	0.2	1.02993		446	3	3.7	Block1534	0.17	254.452	0.4	-1.31241			2848	16	5.769	Block8406	5.913	**	3.37	3.11727
2148	12	39.068	Block6362	5.609	**	97.6458	106.373		2164	13	0.13	Block6405	6.405	**	67.0565	61.6606		447	3	3.743	Block1535	0.05	368.326	0.1	0.871909		447	3	3.743	Block1535	0.2	254.277	0.5	-1.42412			2849	16	5.796	Block8407	5.624	**	3.33077	3.1157
2149	12	39.16	Block6363	5.856	**	97.6458	106.578		2165	13	0.238	Block6409	6.405	**	67.0565	61.6606		448	3	3.802	Block1541	0.31	366.16	0.7	2.46974		448	3	3.802	Block1541	0.01	255.422	0	-0.282013			2850	16	5.843	Block8409	5.781	**	3.33077	3.11325
2150	12	39.25	Block6366	3.6	*	98.6579	106.21		2166	13	0.295	Block6410	6.682	***	67.1929	61.6606		449	3	3.891	Block1543	0.31	366.16	0.7	2.46974		449	3	3.891	Block1543	0.01	255.422	0	-0.282013			2851	16	5.931	Block8410	5.781	**	3.33077	3.11325
2151	12	39.273	Block6367	3.776	*	98.2944	106.21		2167	13	0.317	Block6411	6.405	**	67.0565	61.6606		450	3	3.958	Block1546	0.29	366.296	0.7	2.37223		450	3	3.958	Block1546	0.02	255.352	0	0.486319			2852	16	5.952	Block8411	5.781	**	3.33077	3.11325
2152	12	39.302	Block6369	3.848	**	98.2944	106.305		2168	13	0.547	Block6413	6.405	**	67.0565	61.6606		451	3	4.225	Block1547	0.35	365.789	0.8	2.63289		451	3	4.225	Block1547	0	255.447	0	0.145645			2853	16	6.052	Block8412	5.624	**	3.33077	3.1157
2153	12	39.401	Block6377	6.056	**	95.1437	106.468		2169	13	0.738	Block6437	6.405	**	67.0565	61.6606		452	3	4.289	Block1555	0.77	362.261	1.8	4.05302		452	3	4.289	Block1555	0.15	254.587	0.3	1.48088			2854	16	6.563	Block8413	5.781	**	3.33077	3.11325
2154	12	39.45	Block6378	5.053	**	96.2824	106.468		2170	13	0.817	Block6446	6.405	**	67.0565	61.6606		453	3	4.337	Block1556	0.68	363.032	1.6	3.74531		453	3	4.337	Block1556	0.16	254.531	0.4	1.50406			2855	16	6.66	Block8414	5.624	**	3.33077	3.1157
2155	12	39.473	Block6379	5.441	**	95.6375	106.468		2171	13	0.938	Block6458	6.405	**	67.0565	61.6606		454	3	4.373	Block1557	0.76	362.354	1.7	3.94767		454	3	4.373	Block1557	0.19	254.339	0.4	1.64754			2856	16	7.258	Block8416	5.681	**	3.33077	3.11526
2156	12	39.535	Block6381	7.719	***	92.2154	106.468		2172	13	1.058	Block6462	6.405	**	67.0565	61.6606		455	3	4.631	Block1558	0.44	365.02	1	3.13886		455	3	4.631	Block1558	0.15	254.567	0.3	1.52857			2857	16	7.343	Block8418	5.624	**	3.33077	3.1157
2157	12	39.653	Block6385	6.244	**	93.0727	106.39		2173	13	1.183	Block6472	6.405	**	67.0565	61.6606		456	3	4.691	Block1559	0.38	365.558	0.9	2.91566		456	3	4.691	Block1559	0.12	254.744	0.3	1.37317			2858	16	7.737	Block8419	5.781	**	3.33077	3.11325
2158	12	39.738	Block6389	5.169	**	98.2923	106.39		2174	13	1.268	Block6494	3.792	*	70.3435	61.764		457	3	4.774	Block1562	0.36	365.74	0.8	2.85908		457	3	4.774	Block1562	0.19	254.359	0.4	1.72064			2859	16	7.913	Block8420	5.624	**	3.33077	3.1157
2159	12	39.813	Block6399	5.378	**	98.2923	106.533		2175	13	1.309	Block6505	7.015	***	67.2929	61.6606		458	3	5.124	Block1564	0.33	365.932	0.8	2.80064		458	3	5.124	Block1564	0.12	254.773	0.3	1.37397			2860	16	8.299	Block8421	5.525	**	3.33077	3.11771
2160	12	39.904	Block6400	5.169	**	98.2923	106.39		2176	13	1.356	Block6509	6.405	**	67.0565	61.6606		459	3	5.381	Block1565	0.29	366.341	0.7	2.58022		459	3	5.381	Block1565	0.09	254.928	0.2	1.20357			2861	16	8.347	Block8422	5.624	**	3.33077	3.1157
2161	12	39.94	Block6401	5.378	**	98.2923	106.533		2177	13	1.483	Block6512	6.808	***	67.3637	61.6606		460	3	5.787	Block1566	0.33	365.932	0.8	2.80064		460	3	5.787	Block1566	0.12	254.773	0.3	1.37397			2862	16	9.21	Block8423	7.279	***	3.36071	3.1157
2162	12	39.983	Block6402	4.75	**	98.544	106.533		2178	13	1.542	Block6522	7.782	***	67.685	61.6606		461	3	5.919	Block1570	0.33	365.922	0.8	2.83337		461	3	5.919	Block1570	0.1	254.857	0.2	1.30005			2863	16	9.266	Block8424	5.624	**	3.33077	3.1157
2205	13	14.268	Block6666	4.434	**	97.0643	105.957		2179	13	1.649	Block6537	6.405	**	67.0565	61.6606		462	3	5.999	Block1572	0.31	366.113	0.7	2.7143		462	3	5.999	Block1572	0.12	254.753	0.3	1.39629			2864	16	10.885	Block8425	5.525	**	3.33077	3.11771
2206	13	14.454	Block6667	4.359	**	97.0643	105.893		2180	13	1.706	Block6548	4.038	**	71.1762	61.764		463	3	6.356	Block1573	0.36	365.683	0.8	2.93763		463	3	6.356	Block1573	0.15	254.575	0.3	1.56987			2865	16	11.014	Block8426	5.624	**	3.33077	3.1157
2207	13	14.499	Block6668	3.264	*	98.44	105.893		2181	13	1.838	Block6550	3.969	**	71.1762	61.8265		464	3	6.386	Block1574	0.56	363.996	1.3	3.63888		464	3	6.386	Block1574	0.25	254.004	0.6	2.00709			2866	16	12.018	Block8427	5.525	**	3.33077	3.11771
2208	13	14.526	Block6670	3.197	*	98.44	105.835		2182	13	1.963	Block6554	4.098	**	71.1762	61.6606		465	3	6.435	Block1577	0.71	362.733	1.6	3.89008		465	3	6.435	Block1577	0.3	253.69	0.7	2.10391			2867	16	12.211	Block8428	5.624	**	3.33077	3.1157
2211	13	14.92	Block6673	3.172	*	98.44	105.76		2183	13	2.269	Block6565	4.357	**	66.9155	61.6606		466	3	6.507	Block1578	0.8	362.03	1.8	4.09655		466	3	6.507	Block1578	0.34	253.429	0.8	2.24698			2868	16	12.31	Block8430	5.624	**	3.33077	3.1157
2212	13	14.987	Block6674	4.263	**	97.0643	105.76		2184	13	2.337	Block6579	6.259	**	67.0262	61.6606		467	3	6.534	Block1579	0.72	362.647	1.7	3.89172		467	3	6.534	Block1579	0.3	253.693	0.7	2.08878			2869	16	13.163	Block8431	5.535	**	3.32143	3.1157
2213	13	15.05	Block6675	4.288	**	97.0643	105.835		2185	13	2.491	Block6591	2.834	*	66.0719	61.5505		468	3	6.579	Block1580	0.64	363.316	1.5	3.68478		468	3	6.579	Block1580	0.26	253.936	0.6	1.94535			2870	16	13.258	Block8432	5.624	**	3.33077	3.1157
2214	13	15.222	Block6676	3.197	*	98.44	105.835		2186	13	2.544	Block6599	5.453	**	72.1391	61.6821		469	3	6.641	Block1581	0.71	362.733	1.6	3.89008		469	3	6.641	Block1581	0.3	253.69	0.7	2.10391			2871	16	13.866	Block8433	5.525	**	3.33077	3.11771
2215	13	15.316	Block6677	3.29	*	98.44	105.969		2187	13	2.636	Block6614	5.415	**	66.7256	61.8224		470	3	6.706	Block1585	0.38	365.505	0.9	3.04652		470	3	6.706	Block1585	0.18	254.406	0.4	1.72771			2872	16	14.324	Block8434	5.624	**	3.33077	3.1157
2216	13	15.349	Block6679	4.434	**	97.0643	105.957		2188	13	4.127	Block6615	5.96	**	66.8871	61.7407		471	3	6.743	Block1587	0	368.747	0	0.200858		471	3	6.743	Block1587	0.13	254.688	0.3	-1.20367			2873	16	14.415	Block8435	5.525	**	3.33077	3.11771
2217	13	15.389	Block6681	3.456	*	97.3167	105.846		2189	13	6.479	Block6616	6.556	**	67.1214	61.7407		472	3	6.777	Block1588	0.01	368.693	0	0.375746		472	3	6.777	Block1588	0.11	254.835	0.2	-1.081			2874	16	14.547	Block8436	5.624	**	3.33077	3.1157
2218	13	15.836	Block6682	3.609	*	97.3167	106.035		2190	13	6.515	Block6617	5.96	**	66.8871	61.7407		473	3	6.799	Block1589	0	368.747	0	0.200858		473	3	6.799	Block1589	0.13	254.688	0.3	-1.20367			2875	16	14.996	Block8437	5.781	**	3.33077	3.11325
2219	13	16.262	Block6684	5.678	**	94.9071	106.313		2204	13	13.899	Block6662	3.639	*	71.955	63.186		474	3	6.841	Block1592	0.11	367.865	0.2	1.53318		474	3	6.841	Block1592	0	255.455	0	-0.0393726			2876	16	15.619	Block8438	5.884	**	3.34167	3.11325
2220	13	16.728	Block6686	6.247	**	92.3909	106.089		2207	13	14.499	Block6668	2.833	*	71.5667	63.5435		475	3	6.882	Block1593	0.18	367.267	0.4	1.98322		475	3	6.882	Block1593	0.01	255.412	0	0.340311			2877	16	15.727	Block8439	5.781	**	3.33077	3.11325
2221	13	17.012	Block6687	3.642	*	96.6857	105.986		2208	13	14.526	Block6670	2.861	*	71.5667	63.5154		476	3	6.906	Block1595	0.17	367.283	0.4	1.97936		476	3	6.906	Block1595	0.01	255.422	0	0.299427			2878	16	18.537	Block8440	5.624	**	3.33077	3.1157
2222	13	17.121	Block6688	3.642	*	96.6857	105.986		2209	13	14.707	Block6671	3.973	**	72.4	63.5154		477	3	6.99	Block1597	0.07	368.177	0.2	1.11219		477	3	6.99	Block1597	0.04	255.203	0.1	-0.727669			2879	16	18.638	Block8441	5.781	**	3.33077	3.11325
2223	13	17.167	Block6689	3.606	*	96.6857	105.94		2210	13	14.773	Block6672	4.04	**	72.4	63.4268		478	3	7.074	Block1599	0.01	368.699	0	0.370571		478	3	7.074	Block1599	0.14	254.65	0.3	-1.26461			2880	16	18.839	Block8442	5.624	**	3.33077	3.1157
2244	13	21.744	Block6726	2.993	*	98.8542	106.407		2211	13	14.92	Block6673	2.919	*	71.5667	63.4268		479	3	7.454	Block1600	0.01	368.694	0	0.381763		479	3	7.454	Block1600	0.13	254.693	0.3	-1.22752			2881	16	18.926	Block8443	5.781	**	3.33077	3.11325
2246	13	21.864	Block6739	3.04	*	98.8542	106.505		2214	13	15.222	Block6676	2.861	*	71.5667	63.5154		480	3	7.526	Block1601	0.01	368.691	0	0.385284		480	3	7.526	Block1601	0.12	254.75	0.3	-1.16772			2882	16	19	Block8444	5.681	**	3.33077	3.11526
2247	13	21.942	Block6742	3.187	*	98.8542	106.766		2215	13	15.316	Block6677	2.776	*	71.5667	63.6322		481	3	7.564	Block1602	0	368.747	0	0.200858		481	3	7.564	Block1602	0.13	254.688	0.3	-1.20367			2883	16	19.117	Block8445	5.781	**	3.33077	3.11325
2248	13	22.002	Block6745	3.052	*	98.8542	106.471		2218	13	15.836	Block6682	2.775	*	72.6667	63.4306		482	3	7.768	Block1611	0.49	364.58	1.1	3.10735		482	3	7.768	Block1611	0.02	255.345	0	0.504711			2884	16	21.07	Block8446	5.681	**	3.33077	3.11526
2249	13	22.072	Block6747	2.993	*	98.8542	106.407		2279	13	27.199	Block6814	2.818	*	74.6	64.0203		483	3	7.821	Block1616	0.08	368.044	0.2	1.1133		483	3	7.821	Block1616	0.08	254.98	0.2	-0.902776			2885	16	21.107	Block8447	5.781	**	3.33077	3.11325
2250	13	22.185	Block6752	2.942	*	98.8542	106.418		2284	13	27.529	Block6830	3.5	*	74.78	64.1876		484	3	7.867	Block1617	0.1	367.885	0.2	1.23088		484	3	7.867	Block1617	0.06	255.12	0.1	-0.759582			2886	16	21.203	Block8448	4.22	**	3.29583	3.11325
2251	13	22.278	Block6754	2.903	*	98.8542	106.281		2297	13	28.412	Block6865	2.803	*	74.6	64.3119		485	3	7.894	Block1622	0.26	366.57	0.6	2.23071		485	3	7.894	Block1622	0	255.456	0	-0.00789985			2887	16	21.469	Block8449	4.079	**	3.29583	3.1157
2253	13	22.453	Block6758	3.117	*	97.9143	106.323		2298	13	28.449	Block6867	2.769	*	74.6	64.3354		486	3	7.997	Block1623	0.36	365.672	0.8	2.68435		486	3	7.997	Block1623	0.01	255.409	0	0.329255			2890	16	21.605	Block8458	5.681	**	3.33077	3.11526
2254	13	22.654	Block6759	3.173	*	97.9143	106.371		2312	13	29.399	Block6917	3.807	*	55.2467	64.6563		487	3	8.081	Block1627	0.1	367.885	0.2	1.23088		487	3	8.081	Block1627	0.06	255.12	0.1	-0.759582			2891	16	21.79	Block8459	5.781	**	3.33077	3.11325
2255	13	22.758	Block6760	3.218	*	97.9143	106.393		2363	13	37.108	Block7082	2.846	*	50.7	64.3541		488	3	8.16	Block1631	0.14	367.551	0.3	1.42939		488	3	8.16	Block1631	0.02	255.349	0	-0.424281			2892	16	21.956	Block8460	4.22	**	3.29583	3.11325
2256	13	23.02	Block6762	4.32	**	97.2773	106.536		2394	14	0.002	Block7150	3.323	*	59.0233	64.9911		489	3	8.221	Block1637	0.36	365.672	0.8	2.68435		489	3	8.221	Block1637	0.01	255.409	0	0.329255			2893	16	24.157	Block8461	5.781	**	3.33077	3.11325
2257	13	23.065	Block6765	4.565	**	97.2773	106.719		2395	14	0.251	Block7151	3.221	*	59.0233	64.9389		490	3	8.29	Block1638	0.32	366.059	0.7	2.50497		490	3	8.29	Block1638	0	255.44	0	0.193291			2895	16	24.278	Block8467	5.781	**	3.33077	3.11325
2258	13	23.145	Block6766	4.549	**	97.2773	106.704		2424	14	3.134	Block7248	5.895	**	57.9176	65.4752		491	3	8.334	Block1639	0.36	365.672	0.8	2.68435		491	3	8.334	Block1639	0.01	255.409	0	0.329255			2896	16	24.307	Block8468	4.22	**	3.29583	3.11325
2262	13	23.947	Block6774	2.853	*	99.7107	106.446		2425	14	3.24	Block7249	6.858	***	57.5314	65.4752		492	3	8.39	Block1645	0.1	367.885	0.2	1.23088		492	3	8.39	Block1645	0.06	255.12	0.1	-0.759582			2897	16	24.562	Block8469	5.781	**	3.33077	3.11325
2263	13	23.977	Block6776	3.952	**	98.324	106.53		2426	14	3.305	Block7250	5.895	**	57.9176	65.4752		493	3	8.483	Block1648	0.06	368.216	0.1	0.962652		493	3	8.483	Block1648	0.09	254.932	0.2	-0.938281			2898	16	24.6	Block8470	4.22	**	3.29583	3.11325
2264	13	24.051	Block6778	2.865	*	98.2476	106.53		2427	14	3.74	Block7251	7.066	***	57.3424	65.5457		494	3	8.563	Block1649	0.06	368.216	0.1	0.962652		494	3	8.563	Block1649	0.09	254.932	0.2	-0.938281			2899	16	24.677	Block8471	4.079	**	3.29583	3.1157
2265	13	24.238	Block6780	2.716	*	98.2476	106.353		2428	14	3.873	Block7252	8.113	****	56.9618	65.5457		495	3	8.688	Block1651	0.17	367.29	0.4	1.7775		495	3	8.688	Block1651	0.01	255.416	0	-0.290571			2900	16	24.808	Block8472	4.22	**	3.29583	3.11325
2266	13	24.395	Block6781	2.989	*	98.6375	106.439		2429	14	3.924	Block7256	3.544	*	58.7036	65.1254		496	3	8.722	Block1653	0.22	366.893	0.5	2.02834		496	3	8.722	Block1653	0	255.433	0	-0.225961			2901	16	25.034	Block8473	6.253	**	3.34091	3.11127
2267	13	24.489	Block6782	3.041	*	98.2091	106.404		2430	14	4.005	Block7263	3.491	*	57.6273	64.9588		497	3	8.817	Block1654	0.26	366.531	0.6	2.24536		497	3	8.817	Block1654	0	255.451	0	-0.101275			2902	16	25.102	Block8474	6.153	**	3.34091	3.11325
2268	13	24.565	Block6784	5.128	**	96.6423	106.537		2433	14	4.495	Block7271	2.946	*	59.28	65.095		498	3	9.054	Block1655	0.32	366.059	0.7	2.50497		498	3	9.054	Block1655	0	255.44	0	0.193291			2903	16	25.19	Block8477	3.624	*	3.34167	3.11828
2269	13	24.67	Block6785	3.197	*	98.2091	106.537		2449	14	6.471	Block7324	4.413	**	55.8	64.7096		499	3	9.884	Block1658	0.08	368.055	0.2	1.1047		499	3	9.884	Block1658	0.07	255.027	0.2	-0.857173			2904	16	25.217	Block8478	5.593	**	3.4	3.11828
2270	13	24.705	Block6786	3.041	*	98.2091	106.404		2477	14	15.039	Block7428	3.861	**	57.3125	65.0971		500	3	9.931	Block1659	0.1	367.885	0.2	1.23088		500	3	9.931	Block1659	0.06	255.12	0.1	-0.759582			2905	16	25.313	Block8479	3.624	*	3.34167	3.11828
2271	13	25.435	Block6787	4.506	**	95.97	106.564		2478	14	15.249	Block7429	3.861	**	57.3125	65.0971		501	3	10.062	Block1660	0.1	367.883	0.2	1.24443		501	3	10.062	Block1660	0.06	255.087	0.1	-0.803435			2906	16	25.635	Block8480	3.515	*	3.34167	3.12061
2272	13	25.843	Block6792	3.955	**	96.09	106.335		2479	14	15.284	Block7430	2.747	*	58.416	65.0971		502	3	10.109	Block1665	0.32	366.059	0.7	2.50497		502	3	10.109	Block1665	0	255.44	0	0.193291			2907	16	25.894	Block8481	3.624	*	3.34167	3.11828
2273	13	26.045	Block6796	3.4	*	97.996	106.44		2481	14	15.676	Block7432	2.747	*	58.416	65.0971		503	3	10.55	Block1667	0.32	366.078	0.7	2.50191		503	3	10.55	Block1667	0	255.445	0	0.156171			2908	16	27.364	Block8482	3.515	*	3.34167	3.12061
2274	13	26.287	Block6797	4.066	**	97.2375	106.44		2482	14	15.892	Block7435	3.181	*	57.681	65.0971		504	3	10.882	Block1669	0.32	366.059	0.7	2.50497		504	3	10.882	Block1669	0	255.44	0	0.193291			2909	16	27.421	Block8483	3.624	*	3.34167	3.11828
2275	13	26.344	Block6801	4.814	**	95.0316	106.335		2490	14	18.542	Block7459	2.747	*	58.416	65.0971		505	3	10.942	Block1670	0.32	366.059	0.7	2.50497		505	3	10.942	Block1670	0	255.44	0	0.193291			2910	16	27.821	Block8484	3.515	*	3.34167	3.12061
2276	13	26.553	Block6802	4.866	**	95.0316	106.385		2501	14	34.735	Block7501	2.747	*	58.416	65.0971		506	3	11.375	Block1671	0.32	366.078	0.7	2.50191		506	3	11.375	Block1671	0	255.445	0	0.156171			2911	16	28.121	Block8485	3.966	**	3.32857	3.11982
2279	13	27.199	Block6814	6.241	**	125.8	104.872		2506	14	35.691	Block7526	2.747	*	58.416	65.0971		507	3	11.627	Block1676	0.75	362.432	1.7	3.98584		507	3	11.627	Block1676	0.22	254.136	0.5	1.81916			2912	16	28.216	Block8486	4.096	**	3.32857	3.11747
2280	13	27.246	Block6815	3.34	*	118.84	104.872		2511	14	42.725	Block7540	2.996	*	56.3583	64.6812		508	3	11.676	Block1677	0.66	363.16	1.5	3.73735		508	3	11.676	Block1677	0.18	254.389	0.4	1.62996			2913	16	28.512	Block8488	4.096	**	3.32857	3.11747
2281	13	27.362	Block6817	3.292	*	118.84	104.892		2512	14	42.847	Block7542	2.996	*	56.3583	64.6812		509	3	11.776	Block1680	0.32	366.078	0.7	2.50191		509	3	11.776	Block1680	0	255.445	0	0.156171			2915	16	29.015	Block8492	4.096	**	3.32857	3.11747
2282	13	27.403	Block6820	2.899	*	118.32	104.843		2513	14	43.975	Block7543	2.973	*	56.3583	64.6951		510	3	12.357	Block1681	0.36	365.691	0.8	2.68244		510	3	12.357	Block1681	0.01	255.419	0	0.292636			2916	16	29.036	Block8493	3.966	**	3.32857	3.11982
2283	13	27.473	Block6826	3.294	*	113.985	104.866		2516	14	45.374	Block7553	5.572	**	55	64.9503		511	3	12.504	Block1687	0.18	367.255	0.4	-1.84529		511	3	12.504	Block1687	0.91	250.116	2.1	-3.46682			2917	16	29.084	Block8494	3.808	*	3.32857	3.12366
2284	13	27.529	Block6830	7.991	****	126.66	104.915		2517	14	45.46	Block7556	4.106	**	56.0933	64.814		512	3	13.075	Block1694	0.11	367.867	0.2	1.27045		512	3	13.075	Block1694	0.12	254.751	0.3	-1.12382			2918	16	29.2	Block8495	2.895	*	3.31667	3.12533
2285	13	27.561	Block6831	6.199	**	125.8	104.915		2573	15	4.12	Block7684	3.844	**	55.7286	64.9566		513	3	13.169	Block1695	0.1	367.914	0.2	1.2353		513	3	13.169	Block1695	0.11	254.789	0.3	-1.09158			2919	16	29.572	Block8496	3.117	*	3.34	3.12578
2289	13	27.877	Block6840	3.35	*	113.985	104.815		2575	15	4.356	Block7687	5.407	**	53.5909	64.9341		514	3	13.256	Block1696	0.11	367.813	0.3	1.30433		514	3	13.256	Block1696	0.07	255.038	0.2	-0.8626			2920	16	29.851	Block8497	5.116	**	3.40833	3.12578
2290	13	27.943	Block6845	5.765	**	116.185	104.59		2576	15	4.501	Block7688	3.002	*	55.4889	64.7214		515	3	13.757	Block1697	0.11	367.791	0.3	1.33286		515	3	13.757	Block1697	0.05	255.153	0.1	-0.742176			2921	16	29.897	Block8498	5.152	**	3.40833	3.12623
2291	13	28.064	Block6848	3.6	*	117.967	104.59		2581	15	5.199	Block7702	2.762	*	57.7	64.6549		516	3	13.977	Block1702	0.32	366.059	0.7	2.50497		516	3	13.977	Block1702	0	255.44	0	0.193291			2952	16	33.125	Block8590	4.347	**	3.26944	3.12019
2292	13	28.162	Block6850	3.523	*	117.967	104.595		2582	15	5.238	Block7703	4.364	**	55.7538	64.6549		517	3	14.606	Block1703	0.32	366.059	0.7	2.50497		517	3	14.606	Block1703	0	255.44	0	0.193291			2981	16	37.096	Block8683	3.055	*	2.98333	3.15414
2293	13	28.209	Block6854	3.512	*	117.967	104.763		2583	15	5.355	Block7704	4.485	**	55.7538	64.7497		518	3	14.676	Block1704	0.32	366.078	0.7	2.50191		518	3	14.676	Block1704	0	255.445	0	0.156171			3059	17	13.12	Block8857	4.175	**	2.96176	3.15697
2294	13	28.244	Block6855	6.684	***	123.88	104.763		2584	15	5.538	Block7706	2.762	*	57.7	64.6549		519	3	14.749	Block1705	0.32	366.078	0.7	2.50191		519	3	14.749	Block1705	0	255.445	0	0.156171			3060	17	13.261	Block8862	4.298	**	2.92692	3.1505
2297	13	28.412	Block6865	6.175	**	125.8	104.909		2585	15	5.576	Block7707	4.364	**	55.7538	64.6549		520	3	14.827	Block1706	0.32	366.078	0.7	2.50191		520	3	14.827	Block1706	0	255.445	0	0.156171			3062	17	13.588	Block8866	5.703	**	2.925	3.15236
2298	13	28.449	Block6867	6.266	**	125.8	104.763		2586	15	5.653	Block7708	3.525	*	56.8357	64.6208		521	3	14.868	Block1708	0.22	366.928	0.5	2.0797		521	3	14.868	Block1708	0	255.455	0	-0.056095			3063	17	13.716	Block8867	4.253	**	2.95	3.15236
2299	13	28.482	Block6868	6.684	***	123.88	104.763		2587	15	5.712	Block7709	3.636	*	56.8357	64.7159		522	3	14.917	Block1710	0.32	366.078	0.7	2.50191		522	3	14.917	Block1710	0	255.445	0	0.156171			3064	17	13.861	Block8882	5.703	**	2.925	3.15236
2300	13	28.549	Block6870	3.906	**	118.4	104.837		2588	15	6.243	Block7712	3.919	**	47.9667	64.3165		523	3	14.965	Block1711	0.32	366.059	0.7	2.50497		523	3	14.965	Block1711	0	255.44	0	0.193291			3065	17	13.896	Block8883	5.703	**	2.925	3.15236
2301	13	28.688	Block6876	3.945	**	118.214	105.174		2589	15	6.688	Block7713	3.98	**	47.9667	64.4047		524	3	15.327	Block1712	0.32	366.078	0.7	2.50191		524	3	15.327	Block1712	0	255.445	0	0.156171			3106	17	23.594	Block8959	3.681	*	2.90556	3.14957
2326	13	30.316	Block6989	3.2	*	118.3	105.174		2590	15	6.87	Block7716	4.4	**	51.36	64.3984		525	3	15.699	Block1713	0.38	365.577	0.9	2.7318		525	3	15.699	Block1713	0	255.432	0	0.233879			3107	17	23.626	Block8961	3.621	*	2.90556	3.14657
2338	13	31.166	Block7027	3.469	*	118.55	105.071		2591	15	6.997	Block7719	3.395	*	55.175	64.5351		526	3	15.792	Block1716	0.32	366.059	0.7	2.50497		526	3	15.792	Block1716	0	255.44	0	0.193291			3134	17	34.801	Block9004	3.073	*	3.01389	3.15147
2394	14	0.002	Block7150	2.751	*	100.03	106.113		2592	15	7.416	Block7722	3.638	*	44.6	64.4503		527	3	16.655	Block1721	0.07	368.154	0.2	1.04765		527	3	16.655	Block1721	0.08	254.98	0.2	-0.921887			3135	17	35.77	Block9005	3.073	*	3.01389	3.15147
2424	14	3.134	Block7248	4.327	**	98.8206	106.673		2593	15	7.732	Block7723	3.601	*	44.6	64.3628		528	3	16.732	Block1722	0.1	367.883	0.2	1.24443		528	3	16.732	Block1722	0.06	255.087	0.1	-0.803435			3136	17	36.191	Block9006	3.411	*	3.00294	3.15178
2425	14	3.24	Block7249	5.072	**	98.4371	106.673		2710	15	35.06	Block8031	3.404	*	59.1867	64.8614		529	3	17.181	Block1724	0.17	367.326	0.4	1.62196		529	3	17.181	Block1724	0.03	255.294	0.1	-0.543007			3137	17	36.41	Block9007	3.384	*	3.00294	3.15147
2426	14	3.305	Block7250	4.327	**	98.8206	106.673		2822	16	1.61	Block8340	3.188	*	72.8	63.1367		530	3	17.246	Block1727	0.42	365.194	1	2.77004		530	3	17.246	Block1727	0	255.431	0	0.233149			3138	17	36.522	Block9008	3.743	*	3.00278	3.15245
2427	14	3.74	Block7251	5.676	**	97.7848	106.835		2823	16	1.895	Block8347	3.077	*	72.8	63.3685		531	3	17.287	Block1729	0.4	365.37	0.9	2.77331		531	3	17.287	Block1729	0.01	255.404	0	0.341323			3139	17	36.558	Block9009	3.743	*	3.00278	3.15245
2428	14	3.873	Block7252	6.515	**	97.4206	106.835		2824	16	1.988	Block8350	3.188	*	72.8	63.1367		532	3	17.383	Block1735	0.49	364.637	1.1	3.28311		532	3	17.383	Block1735	0.13	254.698	0.3	1.40652			3140	17	37.052	Block9010	3.743	*	3.00278	3.15245
2429	14	3.924	Block7256	3.564	*	98.2321	106.537		2825	16	2.284	Block8354	2.823	*	72.8	63.6654		533	3	17.687	Block1736	0.56	364.036	1.3	3.50118		533	3	17.687	Block1736	0.16	254.517	0.4	1.55979			3147	17	38.507	Block9034	8.816	****	2.85	3.15698
2433	14	4.495	Block7271	2.828	*	99.4086	106.461		2847	16	5.365	Block8405	2.714	*	55.9778	64.7497		534	3	17.823	Block1737	0.49	364.637	1.1	3.28311		534	3	17.823	Block1737	0.13	254.698	0.3	1.40652			3153	17	39.029	Block9053	3.384	*	2.93	3.15173
2534	14	47.505	Block7602	3.19	*	113.53	104.898		2849	16	5.796	Block8407	5.704	**	54.4231	64.9577		535	3	18.574	Block1738	0.45	364.938	1	3.09882		535	3	18.574	Block1738	0.1	254.841	0.2	1.24209			3158	17	39.561	Block9093	2.862	*	3.02692	3.14816
2596	15	10.147	Block7728	2.935	*	122.72	105.018		2850	16	5.843	Block8409	5.876	**	54.4231	65.0552		536	3	19.231	Block1741	0.79	362.061	1.8	4.03621		536	3	19.231	Block1741	0.21	254.243	0.5	1.71659			3159	17	39.598	Block9095	2.912	*	3.02692	3.14918
2597	15	10.265	Block7730	3.753	*	120.543	104.912		2851	16	5.931	Block8410	5.778	**	54.4231	65.0228		537	3	19.291	Block1743	1.03	360.042	2.4	4.52288		537	3	19.291	Block1743	0.31	253.619	0.7	2.07509			3210	18	4.891	Block9238	2.738	*	2.99667	3.1505
2598	15	10.606	Block7731	2.966	*	118.062	104.912		2852	16	5.952	Block8411	5.876	**	54.4231	65.0552		538	3	19.328	Block1745	0.94	360.867	2.1	4.24275		538	3	19.328	Block1745	0.25	253.996	0.6	1.82371			3211	18	4.931	Block9239	2.707	*	2.99667	3.15019
2608	15	11.877	Block7755	3.071	*	116.631	104.613		2853	16	6.052	Block8412	5.704	**	54.4231	64.9577		539	3	19.384	Block1747	1.09	359.552	2.5	4.4014		539	3	19.384	Block1747	0.31	253.621	0.7	1.96412			3212	18	5.022	Block9242	2.738	*	2.99667	3.1505
2609	15	12.161	Block7756	3.048	*	116.631	104.664		2854	16	6.563	Block8413	5.876	**	54.4231	65.0552		540	3	19.646	Block1749	0.77	362.232	1.8	3.9612		540	3	19.646	Block1749	0.26	253.922	0.6	1.91886			3213	18	5.084	Block9243	2.738	*	2.99667	3.1505
2610	15	12.439	Block7758	3.006	*	116.631	104.759		2855	16	6.66	Block8414	5.704	**	54.4231	64.9577		541	3	20.514	Block1750	0.77	362.246	1.8	3.96852		541	3	20.514	Block1750	0.25	253.976	0.6	1.8904			3249	18	12.484	Block9364	4.392	**	2.98864	3.15389
2611	15	12.613	Block7759	2.958	*	116.631	104.797		2856	16	7.258	Block8416	5.778	**	54.4231	64.9906		542	3	20.858	Block1751	0.77	362.246	1.8	3.96852		542	3	20.858	Block1751	0.25	253.976	0.6	1.8904			3250	18	12.524	Block9365	4.707	**	2.98913	3.15389
2612	15	12.643	Block7760	3.017	*	116.631	104.725		2857	16	7.343	Block8418	5.704	**	54.4231	64.9577		543	3	21.858		0.52	364.189	1.2	3.44767		543	3	21.858		0.22	254.147	0.5	1.84904			3252	18	12.782	Block9377	4.707	**	2.98913	3.15389
2613	15	12.809	Block7761	3.593	*	116.707	104.725		2858	16	7.737	Block8419	5.876	**	54.4231	65.0552		544	3	22.262	Block1752	0.4	365.336	0.9	3.05102		544	3	22.262	Block1752	0.2	254.257	0.5	1.80301			3270	18	48.539	Block9401	2.817	*	2.94286	3.13964
2615	15	12.904	Block7763	3.593	*	116.707	104.725		2859	16	7.913	Block8420	5.704	**	54.4231	64.9577		545	3	23.262		0.23	366.705	0.6	2.3919		545	3	23.262		0.13	254.668	0.3	1.47894			3273	18	49.398	Block9410	2.732	*	3.02778	3.14987
2849	16	5.796	Block8407	4.841	**	93.8308	106.371		2860	16	8.299	Block8421	5.607	**	54.4231	64.8928		546	3	23.711	Block1755	0.16	367.39	0.4	1.9716		546	3	23.711	Block1755	0.1	254.876	0.2	1.27879			3318	18	56.635	Block9534	3.177	*	2.96818	3.14581
2850	16	5.843	Block8409	4.926	**	93.8308	106.451		2861	16	8.347	Block8422	5.704	**	54.4231	64.9577		547	3	24.225	Block1756	0.13	367.65	0.3	1.76803		547	3	24.225	Block1756	0.06	255.076	0.1	1.03146			3322	18	57.123	Block9542	4.014	**	2.94583	3.14581
2851	16	5.931	Block8410	4.831	**	93.8308	106.384		2862	16	9.21	Block8423	5.543	**	54.9071	64.9577		548	3	24.489	Block1757	0.16	367.39	0.4	1.9716		548	3	24.489	Block1757	0.1	254.876	0.2	1.27879			3328	18	57.445	Block9560	4.661	**	2.95357	3.14581
2852	16	5.952	Block8411	4.926	**	93.8308	106.451		2863	16	9.266	Block8424	5.704	**	54.4231	64.9577		549	3	25.297	Block1760	0.46	364.886	1.1	3.25682		549	3	25.297	Block1760	0.26	253.921	0.6	2.0478			3329	18	57.481	Block9561	2.749	*	3.01	3.14581
2853	16	6.052	Block8412	4.841	**	93.8308	106.371		2864	16	10.885	Block8425	5.607	**	54.4231	64.8928		550	3	25.334	Block1761	0.4	365.336	0.9	3.05102		550	3	25.334	Block1761	0.2	254.257	0.5	1.80301			3330	18	57.614	Block9562	2.749	*	3.01	3.14581
2854	16	6.563	Block8413	4.926	**	93.8308	106.451		2865	16	11.014	Block8426	5.704	**	54.4231	64.9577		551	3	25.603	Block1762	0.41	365.322	0.9	3.04619		551	3	25.603	Block1762	0.21	254.207	0.5	1.83401			3341	19	1.156	Block9596	3.248	*	2.85	3.13841
2855	16	6.66	Block8414	4.841	**	93.8308	106.371		2866	16	12.018	Block8427	5.607	**	54.4231	64.8928		552	3	26.119	Block1765	0.66	363.185	1.5	3.58577		552	3	26.119	Block1765	0.31	253.622	0.7	2.05517			3358	19	6.006	Block9639	4.195	**	3.6	3.12879
2856	16	7.258	Block8416	4.831	**	93.8308	106.354		2867	16	12.211	Block8428	5.704	**	54.4231	64.9577		553	3	26.481	Block1769	0.16	367.39	0.4	1.9716		553	3	26.481	Block1769	0.1	254.876	0.2	1.27879			3360	19	7.387	Block9646	9.137	****	3.65	3.13822
2857	16	7.343	Block8418	4.841	**	93.8308	106.371		2868	16	12.31	Block8430	5.704	**	54.4231	64.9577		554	3	27.124	Block1770	0.23	366.812	0.5	2.39309		554	3	27.124	Block1770	0.16	254.532	0.4	1.64465			3361	19	7.456	Block9648	4.277	**	3.6	3.13822
2858	16	7.737	Block8419	4.926	**	93.8308	106.451		2869	16	13.163	Block8431	4.268	**	55.9786	64.9577		555	3	27.199	Block1771	0.16	367.39	0.4	1.9716		555	3	27.199	Block1771	0.1	254.876	0.2	1.27879			3362	19	7.502	Block9649	4.289	**	3.6	3.1386
2859	16	7.913	Block8420	4.841	**	93.8308	106.371		2870	16	13.258	Block8432	5.704	**	54.4231	64.9577		556	3	27.662	Block1773	0.4	365.336	0.9	3.05102		556	3	27.662	Block1773	0.2	254.257	0.5	1.80301			3363	19	7.556	Block9650	4.289	**	3.6	3.1386
2860	16	8.299	Block8421	4.746	**	93.8308	106.275		2871	16	13.866	Block8433	5.607	**	54.4231	64.8928		557	3	27.936	Block1775	0.16	367.39	0.4	1.9716		557	3	27.936	Block1775	0.1	254.876	0.2	1.27879			3364	19	7.769	Block9655	4.195	**	3.6	3.12879
2861	16	8.347	Block8422	4.841	**	93.8308	106.371		2872	16	14.324	Block8434	5.704	**	54.4231	64.9577		558	3	28.084	Block1776	0.16	367.39	0.4	1.9716		558	3	28.084	Block1776	0.1	254.876	0.2	1.27879			3367	19	8.148	Block9667	4.277	**	3.6	3.13822
2862	16	9.21	Block8423	4.874	**	94.3214	106.371		2873	16	14.415	Block8435	5.607	**	54.4231	64.8928		559	3	28.336	Block1778	0.4	365.336	0.9	3.05102		559	3	28.336	Block1778	0.2	254.257	0.5	1.80301			3368	19	8.317	Block9671	4.195	**	3.6	3.12879
2863	16	9.266	Block8424	4.841	**	93.8308	106.371		2874	16	14.547	Block8436	5.704	**	54.4231	64.9577		560	3	28.391	Block1779	0.41	365.322	0.9	3.04619		560	3	28.391	Block1779	0.21	254.207	0.5	1.83401			3370	19	8.485	Block9678	4.277	**	3.6	3.13822
2864	16	10.885	Block8425	4.746	**	93.8308	106.275		2875	16	14.996	Block8437	5.876	**	54.4231	65.0552		561	3	28.475	Block1783	0.66	363.185	1.5	3.58577		561	3	28.475	Block1783	0.31	253.622	0.7	2.05517			3371	19	8.526	Block9683	4.195	**	3.6	3.12879
2865	16	11.014	Block8426	4.841	**	93.8308	106.371		2876	16	15.619	Block8438	6.412	**	53.6	65.0552		562	3	28.768	Block1784	0.36	365.691	0.8	2.81314		562	3	28.768	Block1784	0.17	254.453	0.4	1.60638			3372	19	9.021	Block9684	4.195	**	3.6	3.12879
2866	16	12.018	Block8427	4.746	**	93.8308	106.275		2877	16	15.727	Block8439	5.876	**	54.4231	65.0552		563	3	28.953	Block1786	0.36	365.691	0.8	2.81314		563	3	28.953	Block1786	0.17	254.453	0.4	1.60638			3373	19	9.768	Block9686	4.172	**	3.6	3.12912
2867	16	12.211	Block8428	4.841	**	93.8308	106.371		2878	16	18.537	Block8440	5.704	**	54.4231	64.9577		564	3	29.09	Block1787	0.42	365.169	1	3.03227		564	3	29.09	Block1787	0.2	254.248	0.5	1.75653			3374	19	10.118	Block9688	4.195	**	3.6	3.12879
2868	16	12.31	Block8430	4.841	**	93.8308	106.371		2879	16	18.638	Block8441	5.876	**	54.4231	65.0552		565	3	29.111	Block1788	0.36	365.691	0.8	2.81314		565	3	29.111	Block1788	0.17	254.453	0.4	1.60638			3375	19	30.044	Block9696	4.265	**	3.6	3.13907
2869	16	13.163	Block8431	5.36	**	93.85	106.371		2880	16	18.839	Block8442	5.704	**	54.4231	64.9577		566	3	29.222	Block1789	0.42	365.169	1	3.03227		566	3	29.222	Block1789	0.2	254.248	0.5	1.75653			3378	19	30.905	Block9707	4.265	**	3.6	3.13907
2870	16	13.258	Block8432	4.841	**	93.8308	106.371		2881	16	18.926	Block8443	5.876	**	54.4231	65.0552		567	3	29.245	Block1790	0.36	365.691	0.8	2.81314		567	3	29.245	Block1790	0.17	254.453	0.4	1.60638			3380	19	31.703	Block9717	4.265	**	3.6	3.13907
2871	16	13.866	Block8433	4.746	**	93.8308	106.275		2882	16	19	Block8444	5.778	**	54.4231	64.9906		568	3	30.245		0.29	366.284	0.7	2.59344		568	3	30.245		0.15	254.574	0.3	1.54594			3381	19	31.834	Block9719	4.277	**	3.6	3.13945
2872	16	14.324	Block8434	4.841	**	93.8308	106.371		2883	16	19.117	Block8445	5.876	**	54.4231	65.0552		569	3	30.497	Block1791	0.26	366.54	0.6	2.47687		569	3	30.497	Block1791	0.14	254.632	0.3	1.50651			3382	19	31.897	Block9721	4.265	**	3.6	3.13907
2873	16	14.415	Block8435	4.746	**	93.8308	106.275		2884	16	21.07	Block8446	5.778	**	54.4231	64.9906		570	3	31.497		0.21	366.94	0.5	2.25036		570	3	31.497		0.1	254.864	0.2	1.28006			3384	19	32.19	Block9726	4.265	**	3.6	3.13907
2874	16	14.547	Block8436	4.841	**	93.8308	106.371		2885	16	21.107	Block8447	5.876	**	54.4231	65.0552		571	3	32.497		0.15	367.51	0.3	1.88304		571	3	32.497		0.06	255.12	0.1	0.972965			3386	19	32.481	Block9741	4.297	**	3.6	3.13352
2875	16	14.996	Block8437	4.926	**	93.8308	106.451		2886	16	21.203	Block8448	4.94	**	54.8167	65.0552		572	3	32.515	Block1792	0.15	367.521	0.3	1.87522		572	3	32.515	Block1792	0.06	255.124	0.1	0.966966			3387	19	32.556	Block9744	4.195	**	3.6	3.12879
2876	16	15.619	Block8438	5.426	**	92.7	106.451		2887	16	21.469	Block8449	4.795	**	54.8167	64.9577		573	3	32.944	Block1797	0.05	368.337	0.1	0.954223		573	3	32.944	Block1797	0.15	254.59	0.3	-1.35187			3388	19	32.96	Block9751	4.265	**	3.6	3.13907
2877	16	15.727	Block8439	4.926	**	93.8308	106.451		2888	16	21.506	Block8451	5.238	**	55.0154	65.0552		574	3	33.173	Block1798	0.04	368.465	0.1	0.798487		574	3	33.173	Block1798	0.17	254.431	0.4	-1.46768			3393	19	33.414	Block9771	4.265	**	3.6	3.13907
2878	16	18.537	Block8440	4.841	**	93.8308	106.371		2889	16	21.54	Block8452	5.141	**	55.0154	64.9906		575	3	33.473	Block1799	0.2	367.107	0.5	1.84121		575	3	33.473	Block1799	0.05	255.17	0.1	-0.763492			3403	19	34.164	Block9789	4.265	**	3.6	3.13907
2879	16	18.638	Block8441	4.926	**	93.8308	106.451		2890	16	21.605	Block8458	5.778	**	54.4231	64.9906		576	3	33.544	Block1800	0.23	366.823	0.5	1.99663		576	3	33.544	Block1800	0.03	255.251	0.1	-0.647795			3405	19	34.44	Block9792	4.265	**	3.6	3.13907
2880	16	18.839	Block8442	4.841	**	93.8308	106.371		2891	16	21.79	Block8459	5.876	**	54.4231	65.0552		577	3	33.573	Block1801	0.2	367.107	0.5	1.84121		577	3	33.573	Block1801	0.05	255.17	0.1	-0.763492			3412	19	35.008	Block9816	4.195	**	3.6	3.12879
2881	16	18.926	Block8443	4.926	**	93.8308	106.451		2892	16	21.956	Block8460	4.94	**	54.8167	65.0552		578	3	33.676	Block1802	0.15	367.507	0.3	1.6243		578	3	33.676	Block1802	0.08	254.977	0.2	-1.00108			3413	19	35.325	Block9817	4.306	**	3.6	3.13
2882	16	19	Block8444	4.831	**	93.8308	106.354		2893	16	24.157	Block8461	5.876	**	54.4231	65.0552		579	3	33.912	Block1803	0.1	367.93	0.2	1.30529		579	3	33.912	Block1803	0.14	254.603	0.3	-1.31646			3414	19	35.382	Block9819	4.277	**	3.6	3.13822
2883	16	19.117	Block8445	4.926	**	93.8308	106.451		2894	16	24.207	Block8463	5.238	**	55.0154	65.0552		580	3	34.008	Block1805	0.04	368.445	0.1	0.823838		580	3	34.008	Block1805	0.26	253.944	0.6	-1.78244			3415	19	35.437	Block9825	4.216	**	3.6	3.13391
2884	16	21.07	Block8446	4.831	**	93.8308	106.354		2895	16	24.278	Block8467	5.876	**	54.4231	65.0552		581	3	34.093	Block1806	0.01	368.666	0	0.462312		581	3	34.093	Block1806	0.33	253.51	0.8	-2.01795			3416	19	35.549	Block9827	4.195	**	3.6	3.12879
2885	16	21.107	Block8447	4.926	**	93.8308	106.451		2896	16	24.307	Block8468	4.94	**	54.8167	65.0552		582	3	34.3	Block1807	0.02	368.588	0	0.615754		582	3	34.3	Block1807	0.29	253.729	0.7	-1.90497			3417	19	35.693	Block9834	4.184	**	3.6	3.12953
2886	16	21.203	Block8448	4.523	**	93.6417	106.451		2897	16	24.562	Block8469	4.813	**	55.3077	65.0552		583	3	34.323	Block1808	0.01	368.666	0	0.462312		583	3	34.323	Block1808	0.33	253.51	0.8	-2.01795			3418	19	35.74	Block9837	4.145	**	3.6	3.1344
2887	16	21.469	Block8449	4.452	**	93.6417	106.371		2898	16	24.6	Block8470	4.94	**	54.8167	65.0552		584	3	34.475	Block1811	0	368.765	0	-0.0929071		584	3	34.475	Block1811	0.13	254.684	0.3	-1.63386			3419	19	35.768	Block9838	4.158	**	3.6	3.13361
2888	16	21.506	Block8451	4.019	**	94.8769	106.451		2899	16	24.677	Block8471	4.795	**	54.8167	64.9577		585	3	34.572	Block1816	0.25	366.62	0.6	3.00497		585	3	34.572	Block1816	0.02	255.351	0	0.665393			3420	19	35.902	Block9839	4.145	**	3.6	3.1344
2889	16	21.54	Block8452	3.929	**	94.8769	106.354		2900	16	24.808	Block8472	4.94	**	54.8167	65.0552		586	3	34.602	Block1817	0.14	367.592	0.3	2.16166		586	3	34.602	Block1817	0	255.449	0	0.166784			3450	19	38.823	Block9937	3.381	*	3.33333	3.14268
2890	16	21.605	Block8458	4.831	**	93.8308	106.354		2901	16	25.034	Block8473	4.45	**	54.6818	65.0071		587	3	34.688	Block1818	0.08	368.093	0.2	1.58479		587	3	34.688	Block1818	0	255.442	0	-0.227147			3451	19	38.951	Block9940	3.742	*	3.33333	3.12412
2891	16	21.79	Block8459	4.926	**	93.8308	106.451		2902	16	25.102	Block8474	4.368	**	54.6818	64.9425		588	3	35.042	Block1828	0	368.754	0	-0.176946		588	3	35.042	Block1828	0.28	253.809	0.6	-1.91507			3452	19	39.032	Block9941	3.779	*	3.33333	3.12337
2892	16	21.956	Block8460	4.523	**	93.6417	106.451		2903	16	25.19	Block8477	4.449	**	52	64.886		589	3	35.108	Block1830	0	368.739	0	-0.261174		589	3	35.108	Block1830	0.31	253.614	0.7	-2.08393			3453	19	39.106	Block9943	3.742	*	3.33333	3.12412
2893	16	24.157	Block8461	4.926	**	93.8308	106.451		2904	16	25.217	Block8478	4.182	**	53.15	64.886		590	3	35.229	Block1832	0	368.768	0	-0.0123735		590	3	35.229	Block1832	0.26	253.904	0.6	-1.97152			3454	19	39.194	Block9949	8.552	****	3.45	3.11904
2894	16	24.207	Block8463	4.019	**	94.8769	106.451		2905	16	25.313	Block8479	4.449	**	52	64.886		591	3	35.273	Block1835	0	368.767	0	-0.029861		591	3	35.273	Block1835	0.25	253.977	0.6	-1.79036			3458	19	39.465	Block9963	4.926	**	3.32692	3.13987
2895	16	24.278	Block8467	4.926	**	93.8308	106.451		2906	16	25.635	Block8480	4.359	**	52	64.792		592	3	35.42	Block1846	0.07	368.177	0.2	-1.30991		592	3	35.42	Block1846	0.35	253.417	0.8	-2.43284			3459	19	39.524	Block9966	3.67	*	3.30417	3.13987
2896	16	24.307	Block8468	4.523	**	93.6417	106.451		2907	16	25.894	Block8481	4.449	**	52	64.886		593	3	35.497	Block1849	0.01	368.656	0	-0.48676		593	3	35.497	Block1849	0.23	254.12	0.5	-1.67975			3460	19	39.593	Block9975	5.509	**	3.35	3.12288
2897	16	24.562	Block8469	4.57	**	94.1846	106.451		2908	16	27.364	Block8482	4.359	**	52	64.792		594	3	35.55	Block1850	0.05	368.377	0.1	-0.895368		594	3	35.55	Block1850	0.23	254.091	0.5	-1.67256			3461	19	39.616	Block9976	5.604	**	3.35	3.1197
2898	16	24.6	Block8470	4.523	**	93.6417	106.451		2909	16	27.421	Block8483	4.449	**	52	64.886		595	3	35.717	Block1853	0.04	368.465	0.1	-0.812394		595	3	35.717	Block1853	0.21	254.2	0.5	-1.65419			3462	19	39.981	Block9988	5.051	**	3.35	3.13653
2899	16	24.677	Block8471	4.452	**	93.6417	106.371		2910	16	27.821	Block8484	4.359	**	52	64.792		596	3	35.811	Block1856	0.01	368.668	0	-0.678795		596	3	35.811	Block1856	0	255.455	0	-0.0523782			3463	19	40.028	Block9991	5.604	**	3.35	3.1197
2900	16	24.808	Block8472	4.523	**	93.6417	106.451		2920	16	29.851	Block8497	2.889	*	54.9429	64.5841		597	3	35.904	Block1857	0.02	368.56	0.1	-0.950548		597	3	35.904	Block1857	0	255.435	0	-0.301052			3467	19	40.264	Block10000	2.939	*	3.28077	3.13635
2901	16	25.034	Block8473	4.712	**	92.7	106.437		2921	16	29.897	Block8498	2.917	*	54.9429	64.6453		598	3	35.941	Block1859	0	368.736	0	-0.394831		598	3	35.941	Block1859	0	255.429	0	0.361672			3471	19	40.555	Block10021	3.489	*	3.29615	3.12117
2902	16	25.102	Block8474	4.629	**	92.7	106.341		2935	16	31.822	Block8537	3.067	*	57.4412	64.8328		599	3	36.052	Block1861	0	368.734	0	-0.399798		599	3	36.052	Block1861	0.01	255.409	0	0.46976			3472	19	40.75	Block10022	3.489	*	3.29615	3.12117
2903	16	25.19	Block8477	5.205	**	87.7571	106.328		2936	16	31.858	Block8540	3.355	*	57.4412	65.2006		600	3	36.115	Block1862	0.01	368.661	0	-0.701993		600	3	36.115	Block1862	0	255.455	0	0.0705759			3473	19	40.95	Block10024	5.495	**	3.35	3.12117
2904	16	25.217	Block8478	5.095	**	89.375	106.328		2937	16	31.908	Block8543	3.007	*	57.7437	65.4347		601	3	36.177	Block1863	0	368.736	0	-0.394831		601	3	36.177	Block1863	0	255.429	0	0.361672			3474	19	40.988	Block10025	3.489	*	3.29615	3.12117
2905	16	25.313	Block8479	5.205	**	87.7571	106.328		2938	16	31.928	Block8544	3.042	*	57.7437	65.4645		602	3	36.408	Block1871	0	368.749	0	-0.31077		602	3	36.408	Block1871	0	255.456	0	-0.0141859			3478	19	41.282	Block10046	6.936	***	3.37083	3.12882
2906	16	25.635	Block8480	5.166	**	87.7571	106.251		2939	16	32.076	Block8545	4.434	**	56.5412	65.6352		603	3	36.452	Block1872	0	368.768	0	0.0266909		603	3	36.452	Block1872	0.01	255.421	0	0.41994			3482	19	41.485	Block10055	7.053	***	3.37083	3.12667
2907	16	25.894	Block8481	5.205	**	87.7571	106.328		2940	16	32.134	Block8546	3.813	*	56.6562	65.5693		604	3	36.492	Block1873	0.04	368.437	0.1	1.36698		604	3	36.492	Block1873	0.09	254.952	0.2	1.6877			3483	19	41.525	Block10062	6.651	***	3.37083	3.13453
2908	16	27.364	Block8482	5.166	**	87.7571	106.251		2941	16	32.176	Block8547	3.588	*	57.1	65.5693		605	3	36.701	Block1874	0.07	368.198	0.2	1.81632		605	3	36.701	Block1874	0.12	254.72	0.3	2.06365			3484	19	41.579	Block10063	7.008	***	3.37083	3.12714
2909	16	27.421	Block8483	5.205	**	87.7571	106.328		2942	16	32.358	Block8552	4.735	**	57.6259	65.5389		606	3	36.906	Block1878	0.22	366.878	0.5	2.33749		606	3	36.906	Block1878	0.48	252.653	1.1	2.84681			3485	19	41.611	Block10065	7.024	***	3.37083	3.12761
2910	16	27.821	Block8484	5.166	**	87.7571	106.251		2943	16	32.414	Block8553	4.911	**	57.6259	65.6771		607	3	37.277	Block1881	0.58	363.832	1.3	3.55088		607	3	37.277	Block1881	1.37	247.471	3.1	4.51649			3486	19	41.701	Block10066	8.696	****	3.40455	3.12679
2911	16	28.121	Block8485	2.732	*	92.675	106.139		2946	16	32.579	Block8565	3.813	*	56.6562	65.5693		608	3	37.355	Block1888	0.18	367.264	0.4	1.90261		608	3	37.355	Block1888	0.51	252.451	1.2	2.6895			3487	19	41.828	Block10067	6.819	***	3.385	3.12981
2912	16	28.216	Block8486	2.761	*	92.675	106.216		2947	16	32.756	Block8573	6.916	***	56.8906	65.5693		609	3	37.382	Block1893	0.06	368.261	0.1	0.925145		609	3	37.382	Block1893	0.11	254.827	0.2	1.03033			3488	19	41.973	Block10075	6.945	***	3.385	3.12043
2913	16	28.512	Block8488	2.761	*	92.675	106.216		2948	16	32.792	Block8575	5.763	**	57.6781	65.5693		610	3	37.527	Block1913	0.06	368.261	0.1	0.925145		610	3	37.527	Block1913	0.11	254.827	0.2	1.03033			3490	19	42.287	Block10084	3.056	*	3.28333	3.13274
2915	16	29.015	Block8492	2.761	*	92.675	106.216		2949	16	32.854	Block8576	5.763	**	57.5871	65.5693		611	3	37.566	Block1914	0.04	368.457	0.1	0.723973		611	3	37.566	Block1914	0.07	255.031	0.2	0.84569			3497	19	42.702	Block10099	2.992	*	3.28077	3.12241
2916	16	29.036	Block8493	2.732	*	92.675	106.139		2950	16	32.986	Block8579	3.969	**	58.5781	65.4202		612	3	37.66	Block1915	0.02	368.607	0	0.515073		612	3	37.66	Block1915	0.04	255.199	0.1	0.650968			3502	19	43.403	Block10121	4.042	**	3.30417	3.11778
2917	16	29.084	Block8494	2.745	*	92.675	106.11		2957	16	33.924	Block8596	2.78	*	58.025	64.9017		613	3	37.746	Block1916	0.03	368.484	0.1	0.683535		613	3	37.746	Block1916	0.05	255.164	0.1	0.693112			3503	19	44.184	Block10122	5.561	**	3.32692	3.11478
2919	16	29.572	Block8496	2.709	*	90.1833	106.047		2964	16	35.686	Block8634	3.546	*	58.2769	65.1608		614	3	37.863	Block1918	0.06	368.287	0.1	0.890602		614	3	37.863	Block1918	0.06	255.109	0.1	0.75606			3504	19	44.221	Block10123	6.51	**	3.33214	3.113
2920	16	29.851	Block8497	3.125	*	91.0286	106.047		2965	16	35.753	Block8639	4.815	**	56.1789	65.096		615	3	38.221	Block1922	0.02	368.621	0	0.680921		615	3	38.221	Block1922	0.58	252.042	1.3	3.28768			3506	19	44.502	Block10135	4.189	**	3.3	3.11581
2921	16	29.897	Block8498	3.104	*	91.0286	105.984		2966	16	35.775	Block8640	5.272	**	55.5556	65.096		616	3	38.297	Block1923	0.01	368.699	0	0.464034		616	3	38.297	Block1923	0.48	252.606	1.1	2.98899			3507	19	44.554	Block10136	2.879	*	3.27692	3.11882
2924	16	30.783	Block8504	3.249	*	97.2875	106.175		2973	16	36.4	Block8666	3.058	*	57.8533	65.1851		617	3	38.368	Block1924	0.02	368.621	0	0.680921		617	3	38.368	Block1924	0.58	252.042	1.3	3.28768			3508	19	44.731	Block10138	2.952	*	3.27692	3.1178
2925	16	30.821	Block8505	3.168	*	97.2875	106.131		3003	17	3.435	Block8732	6.723	***	71.8533	62.7743		618	3	38.436	Block1927	0.01	368.714	0	0.424261		618	3	38.436	Block1927	0.46	252.778	1	2.99202			3512	19	45.043	Block10153	2.866	*	3.255	3.11448
2926	16	30.912	Block8506	3.216	*	97.2875	106.151		3004	17	3.467	Block8733	6.884	***	71.8533	62.6821		619	3	38.801	Block1928	0	368.756	0	0.198097		619	3	38.801	Block1928	0.37	253.285	0.8	2.67914			3513	19	45.204	Block10154	2.866	*	3.255	3.11448
2930	16	31.333	Block8518	3.745	*	96.1813	105.846		3005	17	3.518	Block8734	6.236	**	71.7586	62.6821		620	3	38.871	Block1931	0.01	368.714	0	0.424261		620	3	38.871	Block1931	0.46	252.778	1	2.99202			3514	19	45.392	Block10155	2.819	*	3.255	3.11523
2931	16	31.432	Block8526	4.322	**	96.1813	106.452		3006	17	3.913	Block8735	6.137	**	71.7586	62.7425		621	3	38.969	Block1932	0	368.756	0	0.198097		621	3	38.969	Block1932	0.37	253.285	0.8	2.67914			3527	19	46.613	Block10228	3.905	**	3.28684	3.11058
2932	16	31.485	Block8527	3.89	**	96.1813	105.938		3007	17	4.005	Block8736	6.236	**	71.7586	62.6821		622	3	38.992	Block1933	0.01	368.714	0	0.424261		622	3	38.992	Block1933	0.46	252.778	1	2.99202			3568	19	49.85	Block10384	3.618	*	3.05667	3.1566
2933	16	31.527	Block8533	3.878	**	96.1813	106.132		3008	17	4.337	Block8737	6.006	**	71.8286	62.6821		623	3	39.089	Block1934	0.04	368.457	0.1	1.04279		623	3	39.089	Block1934	0.61	251.876	1.4	3.53986			3578	20	0.651	Block10416	3.531	*	2.95929	3.15283
2934	16	31.708	Block8534	3.852	**	96.1813	106.164		3009	17	4.463	Block8738	5.86	**	71.8286	62.7743		624	3	39.283	Block1936	0.02	368.583	0.1	0.798838		624	3	39.283	Block1936	0.51	252.485	1.2	3.20556			3590	20	2.514	Block10447	3.479	*	3.25231	3.12469
2935	16	31.822	Block8537	4.264	**	96.1765	106.219		3010	17	4.515	Block8739	6.006	**	71.8286	62.6821		625	3	39.438	Block1937	0.04	368.457	0.1	1.04279		625	3	39.438	Block1937	0.61	251.876	1.4	3.53986			3592	20	3.371	Block10452	3.174	*	3.24462	3.12531
2936	16	31.858	Block8540	4.471	**	96.1765	106.454		3011	17	4.625	Block8740	5.86	**	71.8286	62.7743		626	3	39.516	Block1939	0.04	368.457	0.1	1.04279		626	3	39.516	Block1939	0.61	251.876	1.4	3.53986			3593	20	3.572	Block10454	3.007	*	3.24462	3.12767
2937	16	31.908	Block8543	4.053	**	96.5	106.552		3012	17	4.695	Block8741	6.006	**	71.8286	62.6821		627	3	39.629	Block1943	0.04	368.457	0.1	1.04279		627	3	39.629	Block1943	0.61	251.876	1.4	3.53986			3594	20	7.607	Block10457	2.858	*	3.24462	3.13439
2938	16	31.928	Block8544	3.96	**	96.5	106.507		3013	17	4.725	Block8742	5.825	**	71.8286	62.8461		628	3	39.661	Block1945	0.02	368.575	0.1	0.811528		628	3	39.661	Block1945	0.52	252.415	1.2	3.2249			3595	20	7.79	Block10458	2.901	*	3.24462	3.13642
2939	16	32.076	Block8545	5.511	**	94.7471	106.748		3014	17	4.9	Block8756	3.732	*	69.7576	63.0667		629	3	39.956	Block1946	0.01	368.673	0	0.557028		629	3	39.956	Block1946	0.41	253.046	0.9	2.80736			3596	20	7.992	Block10459	2.901	*	3.24462	3.13642
2940	16	32.134	Block8546	5.247	**	94.55	106.695		3015	17	4.952	Block8757	3.499	*	69.7219	63.0667		630	3	40.061	Block1947	0.04	368.448	0.1	1.05263		630	3	40.061	Block1947	0.62	251.803	1.4	3.55495			3664	20	34.469	Block10607	3.058	*	3.35714	3.1288
2941	16	32.176	Block8547	5.127	**	95.0824	106.695		3016	17	5.014	Block8760	3.634	*	69.7219	62.8701		631	3	40.223	Block1948	0.04	368.457	0.1	1.04279		631	3	40.223	Block1948	0.61	251.876	1.4	3.53986			3668	20	34.678	Block10634	2.962	*	2.98438	3.1486
2942	16	32.358	Block8552	3.433	*	99.237	106.739		3017	17	5.423	Block8763	3.525	*	69.7219	63.0503		632	3	40.467	Block1949	0.12	367.705	0.3	1.9887		632	3	40.467	Block1949	0.96	249.845	2.2	4.56927			3682	20	35.874	Block10787	3.969	**	3.35	3.13586
2943	16	32.414	Block8553	3.604	*	99.237	106.889		3018	17	5.451	Block8765	3.354	*	69.7219	63.1717		633	3	40.528	Block1950	0.15	367.462	0.4	2.26262		633	3	40.528	Block1950	1.05	249.32	2.4	4.90412			3684	20	35.934	Block10796	3.969	**	3.35	3.13586
2946	16	32.579	Block8565	5.247	**	94.55	106.695		3019	17	5.524	Block8766	3.393	*	69.7219	63.1513		634	3	40.6	Block1951	0.3	366.186	0.7	3.29438		634	3	40.6	Block1951	1.17	248.656	2.7	5.34675			3687	20	36.045	Block10806	3.969	**	3.35	3.13586
2947	16	32.756	Block8573	5.587	**	97.9875	106.695		3020	17	5.855	Block8767	3.525	*	69.7219	63.0503		635	3	40.782	Block1952	0.32	366.051	0.7	3.26313		635	3	40.782	Block1952	1.33	247.697	3	5.51467			3688	20	36.162	Block10807	4.013	**	3.35	3.135
2948	16	32.792	Block8575	4.142	**	99.3031	106.695		3021	17	5.967	Block8770	3.52	*	69.7219	62.9852		636	3	41.256	Block1954	0.27	366.471	0.6	2.81874		636	3	41.256	Block1954	1.01	249.532	2.3	4.52666			3689	20	36.206	Block10819	3.969	**	3.35	3.13586
2949	16	32.854	Block8576	4.608	**	98.829	106.695		3022	17	6.184	Block8771	2.818	*	69.4677	63.0748		637	3	41.499	Block1955	0.09	367.969	0.2	1.71344		637	3	41.499	Block1955	0.84	250.553	1.9	4.24406			3690	20	36.343	Block10841	3.955	**	3.35	3.13545
2950	16	32.986	Block8579	4.593	**	98.9812	106.715		3028	17	7.231	Block8780	2.742	*	69.6826	63.3241		638	3	41.573	Block1958	0.01	368.724	0	-0.365762		638	3	41.573	Block1958	0.18	254.367	0.4	1.81314			3701	20	36.962	Block10918	2.706	*	3.325	3.14081
2951	16	33.057	Block8583	3.666	*	99.0909	106.809		3029	17	7.296	Block8781	3.715	*	70.2875	63.2035		639	3	41.803	Block1962	0.09	368.027	0.2	-1.33278		639	3	41.803	Block1962	0.01	255.394	0	-0.385758			3714	20	37.652	Block11006	3.03	*	3.27727	3.12364
2952	16	33.125	Block8590	5.475	**	94.8611	106.416		3030	17	7.325	Block8782	3.338	*	70.2217	63.2529		640	3	41.918	Block1964	0.1	367.946	0.2	-1.27944		640	3	41.918	Block1964	0.01	255.407	0	-0.31089			3715	20	37.676	Block11008	2.945	*	3.27727	3.12457
2953	16	33.356	Block8591	5.63	**	95.0632	106.46		3031	17	7.377	Block8783	5.585	**	71.596	62.9721		641	3	41.969	Block1968	0.29	366.318	0.7	-2.03591		641	3	41.969	Block1968	0.09	254.921	0.2	-0.951316			3716	20	37.754	Block11016	3.346	*	3.25	3.12089
2954	16	33.417	Block8592	6.344	**	94.86	106.46		3032	17	7.948	Block8786	6.079	**	71.596	62.5811		642	3	42.015	Block1972	0.46	364.846	1.1	-2.40356		642	3	42.015	Block1972	0.25	254.003	0.6	-1.46311			3717	20	37.826	Block11023	4.174	**	3.26364	3.11974
2955	16	33.761	Block8594	6.048	**	94.86	106.108		3033	17	7.978	Block8788	5.165	**	71.3542	62.6174		643	3	42.098	Block1977	0.41	365.312	0.9	-2.61842		643	3	42.098	Block1977	0.09	254.946	0.2	-1.0054			3718	20	37.926	Block11041	3.409	*	3.25	3.11974
2956	16	33.846	Block8595	6.048	**	94.86	106.108		3034	17	8.038	Block8789	6.292	**	71.896	62.6174		644	3	42.225	Block1981	0.01	368.651	0	0.659162		644	3	42.225	Block1981	0.73	251.183	1.7	3.98772			3719	20	37.953	Block11042	3.517	*	3.25	3.11632
2957	16	33.924	Block8596	6.282	**	94.86	106.305		3035	17	8.068	Block8790	6.217	**	71.896	62.6777		645	3	42.398	Block1982	0	368.767	0	-0.0416784		645	3	42.398	Block1982	0.35	253.399	0.8	2.85954			3720	20	38	Block11043	3.409	*	3.25	3.11974
2958	16	34.051	Block8610	3.05	*	98.0833	105.753		3036	17	8.093	Block8791	6.292	**	71.896	62.6174		646	3	42.758	Block1986	0.02	368.575	0.1	-0.816038		646	3	42.758	Block1986	0.14	254.624	0.3	1.69672			3721	20	38.03	Block11044	3.517	*	3.25	3.11632
2964	16	35.686	Block8634	2.872	*	100.646	106.071		3037	17	8.178	Block8792	5.165	**	71.3542	62.6174		647	3	42.964	Block1988	0	368.751	0	0.229702		647	3	42.964	Block1988	0.46	252.773	1.1	2.88542			3722	20	38.062	Block11048	2.985	*	3.24211	3.12078
2965	16	35.753	Block8639	5.66	**	96.3895	106.039		3038	17	8.391	Block8793	3.797	*	70.1435	62.8351		648	3	43.154	Block2000	0.23	366.802	0.5	-1.98383		648	3	43.154	Block2000	0.01	255.402	0	-0.327785			3723	20	38.102	Block11050	2.855	*	3.24211	3.12439
2966	16	35.775	Block8640	6.061	**	95.8222	106.039		3041	17	8.858	Block8803	3.142	*	68.9458	63.4903		649	3	43.201	Block2001	0.16	367.379	0.4	-1.68764		649	3	43.201	Block2001	0	255.455	0	-0.0385265			3724	20	38.127	Block11051	2.96	*	3.24211	3.12103
2967	16	35.862	Block8649	3.109	*	98.0833	105.797		3047	17	10.089	Block8812	3.136	*	69.7611	63.6311		650	3	43.538	Block2005	0.96	360.66	2.2	-4.39981		650	3	43.538	Block2005	0	255.446	0	-0.154835			3725	20	38.171	Block11053	3.323	*	3.25625	3.12189
2968	16	36.124	Block8651	3.109	*	98.0833	105.797		3066	17	14.166	Block8886	3.036	*	80.6333	63.8959		651	3	43.565	Block2006	0.97	360.605	2.2	-4.48143		651	3	43.565	Block2006	0	255.448	0	-0.141644			3726	20	38.398	Block11054	3.481	*	3.25625	3.11886
2973	16	36.4	Block8666	2.973	*	99.48	106.168		3156	17	39.384	Block9079	3.142	*	68.5852	63.8685		652	3	43.631	Block2013	0.58	363.848	1.3	-4.11209		652	3	43.631	Block2013	0.13	254.708	0.3	1.60334			3727	20	38.467	Block11055	3.473	*	3.25625	3.11834
2974	16	36.516	Block8668	3.574	*	98.0833	106.168		3160	17	39.666	Block9101	7.311	***	73.9571	64.0598		653	3	43.66	Block2015	0.14	367.57	0.3	-2.27498		653	3	43.66	Block2015	1.03	249.423	2.4	5.10525			3728	20	38.606	Block11056	3.263	*	3.25625	3.126
2975	16	36.606	Block8670	3.231	*	98.7385	106.166		3164	17	39.949	Block9110	2.945	*	69.5824	64.1988		654	3	43.687	Block2016	0.11	367.85	0.2	-1.97585		654	3	43.687	Block2016	1.1	249.023	2.5	5.23157			3729	20	38.76	Block11059	3.323	*	3.25625	3.12189
2976	16	36.675	Block8673	4.355	**	96.8214	106.071		3181	18	0.705	Block9169	6.243	**	53.2154	64.9789		655	3	43.843	Block2017	0.2	367.092	0.5	-2.65073		655	3	43.843	Block2017	0.84	250.524	1.9	4.54643			3730	20	39.282	Block11061	3.121	*	3.29444	3.12305
2977	16	36.733	Block8675	3.419	*	98.0833	106.071		3182	18	0.916	Block9170	6.944	***	53.1714	64.9789		656	3	43.885	Block2021	0.22	366.909	0.5	-2.61799		656	3	43.885	Block2021	0.41	253.061	0.9	2.97203			3731	20	39.439	Block11064	3.136	*	3.29444	3.12503
2979	16	36.894	Block8677	3.419	*	98.0833	106.071		3183	18	1.134	Block9171	3.816	*	56.0688	64.8546		657	3	43.964	Block2022	0.33	365.923	0.8	-3.45156		657	3	43.964	Block2022	0.42	252.987	1	3.21514			3732	20	39.528	Block11066	3.087	*	3.29444	3.12706
3023	17	6.501	Block8773	2.761	*	100.763	106.406		3184	18	1.245	Block9172	3.106	*	56.4733	64.8546		658	3	44.028	Block2027	0.16	367.423	0.4	-2.62647		658	3	44.028	Block2027	1.44	247.098	3.3	6.54877			3739	20	40.069	Block11080	3.084	*	3.375	3.13855
3024	17	6.556	Block8774	2.864	*	100.576	106.405		3194	18	2.79	Block9201	2.717	*	58.6478	64.9855		659	3	44.202	Block2030	0.11	367.832	0.3	-1.91557		659	3	44.202	Block2030	0.59	251.972	1.4	3.69636			3740	20	40.119	Block11083	3.336	*	3.375	3.12488
3025	17	6.599	Block8775	2.864	*	100.576	106.405		3211	18	4.931	Block9239	2.815	*	57.5235	64.8756		660	3	44.299	Block2032	0.16	367.415	0.4	-2.27611		660	3	44.299	Block2032	0.47	252.717	1.1	3.23847			3741	20	40.154	Block11084	3.439	*	3.375	3.12114
3066	17	14.166	Block8886	3.417	*	129.833	104.957		3214	18	5.237	Block9246	3.183	*	57.77	64.8466		661	3	44.334	Block2033	0.08	368.064	0.2	-1.65187		661	3	44.334	Block2033	0.65	251.654	1.5	3.83822			3745	20	40.543	Block11095	3.281	*	2.97143	3.14955
3181	18	0.705	Block9169	3.072	*	97.0769	105.989		3223	18	7.385	Block9291	2.92	*	58.2286	64.908		662	3	44.362	Block2037	0.16	367.423	0.4	-2.62647		662	3	44.362	Block2037	1.44	247.098	3.3	6.54877
3182	18	0.916	Block9170	3.763	*	96.6429	105.989		3224	18	7.408	Block9292	2.787	*	58.2286	64.7819		663	3	44.45	Block2043	0.16	367.407	0.4	-1.78108		663	3	44.45	Block2043	0.06	255.1	0.1	0.911517
3308	18	55.026	Block9512	3.715	*	116.729	104.907		3225	18	7.448	Block9294	2.787	*	58.2286	64.7819		664	3	44.517	Block2047	0.15	367.472	0.4	-1.76918		664	3	44.517	Block2047	0.09	254.91	0.2	1.14756
3528	19	46.704	Block10235	4.918	**	97.068	106.172		3234	18	8.513	Block9327	2.787	*	58.2286	64.7819		665	3	44.554	Block2048	0.13	367.664	0.3	-1.65818		665	3	44.554	Block2048	0.13	254.675	0.3	1.39466
3575	20	0.476	Block10409	4.32	**	87.2125	106.167		3318	18	56.635	Block9534	4.073	**	52.7455	64.8432		666	3	44.589	Block2050	0.33	365.956	0.8	-2.63758		666	3	44.589	Block2050	0.03	255.295	0.1	0.631473
3576	20	0.532	Block10412	5.731	**	87.2556	106.341		3329	18	57.481	Block9561	3.857	**	55.0333	64.8432		667	3	44.66	Block2051	0.27	366.439	0.6	-2.38568		667	3	44.66	Block2051	0.03	255.271	0.1	0.672763
3577	20	0.576	Block10414	5.206	**	84.4857	106.242		3330	18	57.614	Block9562	2.944	*	56.2	64.8432		668	3	44.735	Block2052	0.24	366.738	0.6	-2.22038		668	3	44.735	Block2052	0.04	255.202	0.1	0.785304
3579	20	1.044	Block10421	3.538	*	87.6714	105.976		3335	19	0.573	Block9569	3.291	*	81.15	63.9756		669	3	44.836	Block2056	0.29	366.308	0.7	-2.47546		669	3	44.836	Block2056	0.04	255.212	0.1	0.780138
3580	20	1.191	Block10423	3.69	*	82.66	105.988		3336	19	0.829	Block9574	3.299	*	81.15	64.3632		670	3	44.904	Block2057	0.32	366.029	0.7	-2.58706		670	3	44.904	Block2057	0.03	255.294	0.1	0.628557
3586	20	1.756	Block10432	5.707	**	87.54	106.273		3337	19	0.857	Block9575	3.299	*	81.15	64.3632		671	3	44.978	Block2060	0.11	367.81	0.3	-1.50739		671	3	44.978	Block2060	0.1	254.841	0.2	1.20744
3590	20	2.514	Block10447	2.897	*	94.8625	106.246		3338	19	0.965	Block9582	3.291	*	81.15	63.9756		672	3	45.029	Block2065	0.06	368.225	0.1	-1.5796		672	3	45.029	Block2065	1.35	247.623	3.1	5.99717
									3339	19	1.074	Block9587	3.238	*	81.15	64.4032		673	3	45.095	Block2069	0.11	367.841	0.3	-1.99869		673	3	45.095	Block2069	0.95	249.921	2.2	4.88413
									3340	19	1.107	Block9590	3.256	*	81.15	64.0454		674	3	45.125	Block2072	0.05	368.322	0.1	-1.35661		674	3	45.125	Block2072	0.86	250.425	2	4.55811
									3359	19	7.358	Block9642	3.125	*	57.6	64.7208		675	3	45.193	Block2074	0.03	368.539	0.1	-0.986315		675	3	45.193	Block2074	1.12	248.931	2.6	5.26433
									3360	19	7.387	Block9646	3.818	*	52.4286	64.7208		676	3	45.245	Block2077	0.04	368.422	0.1	-1.27041		676	3	45.245	Block2077	1.5	246.765	3.4	6.37151
									3365	19	8.055	Block9662	2.911	*	57.6	64.7208		677	3	45.415	Block2079	0.07	368.156	0.2	-1.67652		677	3	45.415	Block2079	1.4	247.319	3.2	6.11255
									3369	19	8.447	Block9674	3.125	*	57.6	64.7208		678	3	45.506	Block2080	0.29	366.294	0.7	2.65733		678	3	45.506	Block2080	3.02	238.223	6.7	7.01386
									3411	19	34.947	Block9810	2.722	*	57.0067	64.5574		679	4	0.007	Block2081	0	368.757	0	0.207659		679	4	0.007	Block2081	0.39	253.183	0.9	3.02812
									3454	19	39.194	Block9949	3.227	*	55.2545	64.6686		680	4	0.079	Block2083	0	368.741	0	0.32539		680	4	0.079	Block2083	0.29	253.72	0.7	2.59051
									3455	19	39.314	Block9952	2.878	*	58.7962	65.2099		681	4	0.123	Block2086	0.01	368.708	0	0.489681		681	4	0.123	Block2086	0.39	253.16	0.9	3.02134
									3456	19	39.346	Block9953	3.025	*	58.7962	65.3429		682	4	0.486	Block2091	0.01	368.722	0	0.390664		682	4	0.486	Block2091	0.2	254.294	0.5	1.97065
									3466	19	40.214	Block9999	2.742	*	58.0938	65.0266		683	4	0.544	Block2094	0	368.741	0	0.32539		683	4	0.544	Block2094	0.29	253.72	0.7	2.59051
									3470	19	40.472	Block10009	3.412	*	57.6773	65.0266		684	4	0.604	Block2095	0	368.757	0	0.207659		684	4	0.604	Block2095	0.39	253.183	0.9	3.02812
									3498	19	42.902	Block10110	2.889	*	58.6579	65.1287		685	4	1.192	Block2096	0	368.755	0	0.222004		685	4	1.192	Block2096	0.47	252.691	1.1	3.31499
									3499	19	43.09	Block10111	3.208	*	58.1722	65.1287		686	4	1.938	Block2097	0.01	368.719	0	-0.439559		686	4	1.938	Block2097	0.32	253.596	0.7	2.70023
									3505	19	44.389	Block10127	7.64	***	57.25	65.6665		687	4	1.991	Block2100	0	368.757	0	-0.20255		687	4	1.991	Block2100	0.2	254.256	0.5	2.09924
									3506	19	44.502	Block10135	3.794	*	57.3611	64.9072		688	4	2.026	Block2101	0	368.767	0	-0.0475536		688	4	2.026	Block2101	0.17	254.442	0.4	1.91837
									3507	19	44.554	Block10136	3.449	*	57.3647	64.8652		689	4	2.23	Block2102	0.15	367.506	0.3	-2.20745		689	4	2.23	Block2102	0	255.454	0	0.0836064
									3508	19	44.731	Block10138	3.557	*	57.3647	64.9732		690	4	2.423	Block2107	0	368.735	0	0.418811		690	4	2.423	Block2107	0.04	255.239	0.1	1.07914
									3509	19	44.833	Block10143	3.835	*	57.3647	65.2626		691	4	2.455	Block2108	0	368.767	0	0.0872788		691	4	2.455	Block2108	0.02	255.327	0.1	0.838993
									3510	19	44.918	Block10148	2.905	*	58.1667	64.9732		692	4	2.495	Block2111	0	368.734	0	-0.358475		692	4	2.495	Block2111	0.01	255.411	0	-0.411169
									3511	19	45	Block10149	3.959	**	57.1368	64.9732		693	4	2.774	Block2112	0.03	368.539	0.1	-0.961856		693	4	2.774	Block2112	0.01	255.39	0	-0.514881
									3512	19	45.043	Block10153	5.846	**	57.2556	65.3211		694	4	2.864	Block2114	0	368.758	0	-0.197308		694	4	2.864	Block2114	0	255.453	0	0.0965261
									3513	19	45.204	Block10154	6.577	**	57.0429	65.4035		695	4	2.919	Block2115	0	368.747	0	0.281432		695	4	2.919	Block2115	0.01	255.394	0	0.479694
									3514	19	45.392	Block10155	6.686	***	57.0429	65.4793		696	4	2.946	Block2116	0.01	368.701	0	0.488128		696	4	2.946	Block2116	0.02	255.345	0	0.62674
									3515	19	45.532	Block10156	5.588	**	57.7259	65.4793		697	4	3.03	Block2117	0.01	368.719	0	-0.43048		697	4	3.03	Block2117	0	255.452	0	-0.119358
									3516	19	45.569	Block10159	5.545	**	57.2042	65.3052		698	4	3.127	Block2118	0.01	368.701	0	0.488128		698	4	3.127	Block2118	0.02	255.345	0	0.62674
									3517	19	45.839	Block10165	6.462	**	57.05	65.6156		699	4	3.291	Block2119	0.01	368.659	0	0.60806		699	4	3.291	Block2119	0.01	255.395	0	0.45292
									3518	19	45.876	Block10169	4.873	**	57.788	65.3052		700	4	3.76	Block2120	0	368.759	0	0.172431		700	4	3.76	Block2120	0	255.442	0	0.211603
									3519	19	46.023	Block10170	4.873	**	57.788	65.3052		701	4	4.09	Block2122	0	368.758	0	0.225503		701	4	4.09	Block2122	0.08	254.97	0.2	1.59608
									3520	19	46.064	Block10171	4.769	**	57.788	65.2561		702	4	4.411	Block2123	0.07	368.151	0.2	1.76162		702	4	4.411	Block2123	0.22	254.172	0.5	2.54092
									3521	19	46.106	Block10183	4.214	**	58.6077	65.6407		703	4	4.442	Block2124	0	368.758	0	0.225503		703	4	4.442	Block2124	0.08	254.97	0.2	1.59608
									3522	19	46.169	Block10187	3.747	*	58.6077	65.3428		704	4	4.722	Block2125	0.07	368.151	0.2	1.76162		704	4	4.722	Block2125	0.22	254.172	0.5	2.54092
									3523	19	46.227	Block10192	4.173	**	58.08	65.123		705	4	4.9	Block2130	0.72	362.684	1.6	4.50976		705	4	4.9	Block2130	0.72	251.216	1.7	3.76477
									3524	19	46.325	Block10193	5.359	**	57.2042	65.123		706	4	4.979	Block2133	0.31	366.094	0.7	2.45976		706	4	4.979	Block2133	0.16	254.536	0.4	1.44251
									3525	19	46.391	Block10194	4.112	**	58.02	65.0404		707	4	5.342	Block2142	0.05	368.328	0.1	0.69977		707	4	5.342	Block2142	0.19	254.318	0.4	1.12507
									3526	19	46.502	Block10215	4.406	**	59.2941	65.6729		708	4	5.765	Block2156	0.41	365.265	0.9	2.81572		708	4	5.765	Block2156	0.13	254.693	0.3	1.314
									3527	19	46.613	Block10228	6.352	**	56.7296	65.2238		709	4	5.819	Block2157	0.34	365.915	0.8	2.5342		709	4	5.819	Block2157	0.09	254.954	0.2	1.06311
									3528	19	46.704	Block10235	9.691	****	55.28	65.609		710	4	5.915	Block2159	0.36	365.697	0.8	2.40375		710	4	5.915	Block2159	0.04	255.225	0.1	0.659592
									3529	19	46.746	Block10243	6.202	**	59.5021	65.609		711	4	6.383	Block2165	0.05	368.34	0.1	0.875222		711	4	6.383	Block2165	0	255.437	0	0.186102
									3530	19	46.79	Block10244	5.384	**	59.9565	65.609		712	4	6.438	Block2167	0.1	367.89	0.2	1.26961		712	4	6.438	Block2167	0.04	255.243	0.1	0.624921
									3531	19	46.928	Block10258	2.743	*	59.4773	65.3147		713	4	6.494	Block2169	0.09	368.033	0.2	1.14882		713	4	6.494	Block2169	0.03	255.256	0.1	0.598748
									3546	19	48.087	Block10303	3.196	*	58.7593	64.8588		714	4	6.674	Block2173	0.1	367.9	0.2	1.27771		714	4	6.674	Block2173	0.03	255.289	0.1	0.560319
									3547	19	48.151	Block10307	3.557	*	58.6667	65.0413		715	4	6.957	Block2175	0.02	368.577	0.1	0.614835		715	4	6.957	Block2175	0	255.451	0	0.102265
									3548	19	48.18	Block10308	2.994	*	58.95	64.9595		716	4	7.022	Block2176	0.01	368.646	0	0.493451		716	4	7.022	Block2176	0	255.456	0	0.00706166
									3549	19	48.242	Block10310	2.994	*	58.95	64.9595		717	4	7.087	Block2177	0.03	368.491	0.1	0.741453		717	4	7.087	Block2177	0	255.433	0	0.213928
									3550	19	48.346	Block10311	2.879	*	58.95	64.8663		718	4	7.123	Block2180	0.1	367.939	0.2	1.31437		718	4	7.123	Block2180	0.04	255.237	0.1	0.674855
									3551	19	48.37	Block10312	2.879	*	58.95	64.8663		719	4	7.254	Block2183	0.03	368.488	0.1	0.791164		719	4	7.254	Block2183	0	255.451	0	-0.101894
									3571	19	50.132	Block10392	2.902	*	59.1233	65.0982		720	4	7.281	Block2185	0	368.747	0	0.212783		720	4	7.281	Block2185	0.04	255.24	0.1	-0.676481
									3586	20	1.756	Block10432	4.841	**	52.8	64.7487		721	4	7.511	Block2188	0.01	368.71	0	-0.382175		721	4	7.511	Block2188	0.14	254.628	0.3	-1.44589
									3675	20	35.233	Block10715	3.072	*	55.35	65.0911		722	4	7.939	Block2193	0.01	368.714	0	-0.354447		722	4	7.939	Block2193	0.11	254.81	0.3	-1.22677
									3676	20	35.308	Block10733	3.072	*	55.35	65.0911		723	4	7.967	Block2196	0	368.764	0	-0.0994785		723	4	7.967	Block2196	0.05	255.132	0.1	-0.892866
									3677	20	35.37	Block10737	3.072	*	55.35	65.0911		724	4	7.996	Block2197	0	368.763	0	0.110422		724	4	7.996	Block2197	0.02	255.32	0.1	-0.58088
									3678	20	35.475	Block10766	3.072	*	55.35	65.0911		725	4	8.176	Block2203	0.77	362.295	1.8	-4.78863		725	4	8.176	Block2203	0.18	254.405	0.4	-1.92975
									3679	20	35.625	Block10779	3.072	*	55.35	65.0911		726	4	8.807	Block2204	0.96	360.676	2.2	-5.52391		726	4	8.807	Block2204	0.23	254.101	0.5	-2.26057
									3680	20	35.7	Block10781	2.983	*	55.35	64.9663		727	4	8.848	Block2206	0.96	360.676	2.2	-5.52391		727	4	8.848	Block2206	0.23	254.101	0.5	-2.26057
									3734	20	39.595	Block11069	3.812	*	56.5091	64.8957		728	4	9.121	Block2209	0.68	362.972	1.6	-4.37734		728	4	9.121	Block2209	0.05	255.162	0.1	-0.985866
									3735	20	39.725	Block11073	3.831	*	56.5091	64.9855		729	4	9.153	Block2210	0.76	362.345	1.7	-4.63389		729	4	9.153	Block2210	0.07	255.055	0.2	-1.15731
									3743	20	40.336	Block11087	2.716	*	55.99	64.3883		730	4	9.264	Block2212	0.85	361.611	1.9	-4.97578		730	4	9.264	Block2212	0.11	254.783	0.3	-1.52608
									3744	20	40.489	Block11089	3.11	*	54.3875	64.3674		731	4	9.375	Block2213	0.76	362.357	1.7	-4.7369		731	4	9.375	Block2213	0.06	255.113	0.1	-1.09479
									3746	20	40.625	Block11100	3.336	*	54.3875	64.7403		732	4	9.899	Block2217	0.83	361.718	1.9	-4.70524		732	4	9.899	Block2217	0.51	252.468	1.2	-3.06342
									3747	20	40.72	Block11105	3.11	*	54.3875	64.3674		733	4	9.963	Block2220	0.52	364.353	1.2	-3.51945		733	4	9.963	Block2220	0.37	253.307	0.8	-2.45527
																		734	4	10.226	Block2225	0.85	361.57	2	-3.72804		734	4	10.226	Block2225	0.9	250.209	2.1	-3.18314
																		735	4	10.398	Block2226	0.75	362.402	1.7	-3.51238		735	4	10.398	Block2226	0.78	250.859	1.8	-2.98481
																		736	4	10.487	Block2228	0.73	362.608	1.7	-3.58263		736	4	10.487	Block2228	0.73	251.16	1.7	-2.99187
																		737	4	10.627	Block2229	0.86	361.5	2	-3.9415		737	4	10.627	Block2229	0.81	250.691	1.9	-3.19133
																		738	4	10.752	Block2230	0.86	361.5	2	-3.9415		738	4	10.752	Block2230	0.81	250.691	1.9	-3.19133
																		739	4	10.948	Block2232	0.81	361.928	1.9	-3.92756		739	4	10.948	Block2232	0.73	251.149	1.7	-3.11647
																		740	4	10.997	Block2233	0.6	363.711	1.4	-3.20602		740	4	10.997	Block2233	0.59	251.965	1.4	-2.66363
																		741	4	11.034	Block2234	0.71	362.724	1.6	-3.46287		741	4	11.034	Block2234	0.72	251.253	1.6	-2.88772
																		742	4	11.186	Block2238	0.6	363.667	1.4	-3.02303		742	4	11.186	Block2238	0.63	251.768	1.4	-2.57058
																		743	4	11.314	Block2250	0.56	364.036	1.3	3.50118		743	4	11.314	Block2250	0.16	254.517	0.4	1.55979
																		744	4	11.422	Block2251	0.49	364.637	1.1	3.28311		744	4	11.422	Block2251	0.13	254.698	0.3	1.40652
																		745	4	11.891	Block2252	0.5	364.509	1.2	3.27914		745	4	11.891	Block2252	0.19	254.336	0.4	1.68133
																		746	4	12.05	Block2253	0.49	364.637	1.1	3.28311		746	4	12.05	Block2253	0.13	254.698	0.3	1.40652
																		747	4	12.141	Block2259	0.33	365.993	0.8	-2.94924		747	4	12.141	Block2259	0.02	255.334	0	-0.618023
																		748	4	12.278	Block2261	0.44	365.063	1	-3.21237		748	4	12.278	Block2261	0.25	253.975	0.6	-2.03132
																		749	4	12.316	Block2262	0.38	365.572	0.9	-3.00502		749	4	12.316	Block2262	0.16	254.499	0.4	-1.64459
																		750	4	12.368	Block2265	0.33	365.993	0.8	-2.94924		750	4	12.368	Block2265	0.02	255.334	0	-0.618023
																		751	4	12.431	Block2270	0.51	364.439	1.2	-3.44896		751	4	12.431	Block2270	0.27	253.861	0.6	-2.09369
																		752	4	12.592	Block2272	0.52	364.344	1.2	-2.81909		752	4	12.592	Block2272	0.54	252.294	1.2	-2.38327
																		753	4	12.729	Block2273	0.47	364.748	1.1	-2.71593		753	4	12.729	Block2273	0.49	252.564	1.1	-2.30383
																		754	4	12.794	Block2276	0.51	364.439	1.2	-3.44896		754	4	12.794	Block2276	0.27	253.861	0.6	-2.09369
																		755	4	13.114	Block2282	0.52	364.344	1.2	-2.81909		755	4	13.114	Block2282	0.54	252.294	1.2	-2.38327
																		756	4	14.102	Block2283	0.6	363.667	1.4	-3.02303		756	4	14.102	Block2283	0.63	251.768	1.4	-2.57058
																		757	4	14.204	Block2287	0.33	365.993	0.8	-2.94924		757	4	14.204	Block2287	0.02	255.334	0	-0.618023
																		758	4	15.204		0.5	364.344	1.2	-3.64355		758	4	15.204		0.11	254.777	0.3	-1.42776
																		759	4	15.709	Block2289	0.58	363.865	1.3	-3.81213		759	4	15.709	Block2289	0.18	254.422	0.4	-1.75058
																		760	4	15.754	Block2292	0.51	364.439	1.2	-3.44896		760	4	15.754	Block2292	0.27	253.861	0.6	-2.09369
																		761	4	15.822	Block2295	0.52	364.344	1.2	-2.81909		761	4	15.822	Block2295	0.54	252.294	1.2	-2.38327
																		762	4	16.1	Block2304	0.33	365.993	0.8	-2.94924		762	4	16.1	Block2304	0.02	255.334	0	-0.618023
																		763	4	16.288	Block2307	0.51	364.439	1.2	-3.44896		763	4	16.288	Block2307	0.27	253.861	0.6	-2.09369
																		764	4	16.337	Block2313	0.6	363.713	1.4	-3.07417		764	4	16.337	Block2313	0.63	251.78	1.4	-2.62144
																		765	4	16.408	Block2317	0.64	363.381	1.5	-3.25119		765	4	16.408	Block2317	0.63	251.788	1.4	-2.68286
																		766	4	16.453	Block2321	0.51	364.439	1.2	-3.44896		766	4	16.453	Block2321	0.27	253.861	0.6	-2.09369
																		767	4	16.558	Block2326	0.33	365.993	0.8	-2.94924		767	4	16.558	Block2326	0.02	255.334	0	-0.618023
																		768	4	16.819	Block2327	0.51	364.463	1.2	-3.65516		768	4	16.819	Block2327	0.08	254.969	0.2	-1.2287
																		769	4	16.883	Block2328	0.33	365.993	0.8	-2.94924		769	4	16.883	Block2328	0.02	255.334	0	-0.618023
																		770	4	17.123	Block2333	0.51	364.439	1.2	-3.44896		770	4	17.123	Block2333	0.27	253.861	0.6	-2.09369
																		771	4	17.855	Block2335	0.39	365.441	0.9	-3.04439		771	4	17.855	Block2335	0.19	254.309	0.4	-1.78775
																		772	4	17.899	Block2338	0.33	365.993	0.8	-2.94924		772	4	17.899	Block2338	0.02	255.334	0	-0.618023
																		773	4	18.201	Block2340	0.4	365.369	0.9	-3.16872		773	4	18.201	Block2340	0.05	255.167	0.1	-0.923165
																		774	4	18.452	Block2345	0	368.767	0	0.0384292		774	4	18.452	Block2345	0.26	253.908	0.6	-2.10767
																		775	4	18.56	Block2350	0.4	365.369	0.9	-3.16872		775	4	18.56	Block2350	0.05	255.167	0.1	-0.923165
																		776	4	19.56		0.4	365.063	1	-3.21061		776	4	19.56		0.05	255.138	0.1	-0.940001
																		777	4	20.56		0.4	364.778	1.1	-3.24953		777	4	20.56		0.05	255.11	0.1	-0.956693
																		778	4	21.56		0.4	364.519	1.2	-3.28458		778	4	21.56		0.05	255.084	0.1	-0.971396
																		779	4	22.56		0.4	364.281	1.2	-3.31757		779	4	22.56		0.05	255.058	0.2	-0.987047
																		780	4	23.56		0.4	364.072	1.3	-3.34605		780	4	23.56		0.05	255.036	0.2	-1.00028
																		781	4	24.56		0.41	363.892	1.3	-3.3708		781	4	24.56		0.05	255.016	0.2	-1.01234
																		782	4	25.56		0.41	363.733	1.4	-3.39426		782	4	25.56		0.05	254.996	0.2	-1.02557
																		783	4	26.56		0.41	363.608	1.4	-3.4124		783	4	26.56		0.05	254.98	0.2	-1.03601
																		784	4	27.56		0.41	363.512	1.4	-3.42689		784	4	27.56		0.05	254.966	0.2	-1.04533
																		785	4	28.56		0.41	363.447	1.4	-3.4377		785	4	28.56		0.06	254.956	0.2	-1.05354
																		786	4	29.56		0.41	363.413	1.5	-3.44481		786	4	29.56		0.06	254.948	0.2	-1.06062
																		787	4	30.56		0.42	363.41	1.5	-3.44818		787	4	30.56		0.06	254.943	0.2	-1.06651
																		788	4	31.56		0.42	363.438	1.4	-3.44772		788	4	31.56		0.06	254.941	0.2	-1.07119
																		789	4	32.56		0.42	363.498	1.4	-3.44333		789	4	32.56		0.06	254.942	0.2	-1.07457
																		790	4	33.56		0.42	363.597	1.4	-3.43282		790	4	33.56		0.06	254.947	0.2	-1.07657
																		791	4	34.56		0.43	363.719	1.4	-3.42096		791	4	34.56		0.06	254.956	0.2	-1.07565
																		792	4	35.56		0.43	363.874	1.3	-3.4048		792	4	35.56		0.06	254.967	0.2	-1.07526
																		793	4	36.56		0.43	364.064	1.3	-3.38274		793	4	36.56		0.06	254.982	0.2	-1.07319
																		794	4	37.56		0.43	364.28	1.2	-3.35869		794	4	37.56		0.06	255.001	0.2	-1.06849
																		795	4	38.56		0.44	364.529	1.1	-3.32908		795	4	38.56		0.06	255.023	0.2	-1.06365
																		796	4	39.56		0.44	364.803	1.1	-3.29633		796	4	39.56		0.07	255.049	0.2	-1.05654
																		797	4	40.236	Block2352	0.44	365.006	1	-3.2714		797	4	40.236	Block2352	0.07	255.068	0.2	-1.05103
																		798	4	41.236		0.48	364.672	1.1	-3.34467		798	4	41.236		0.13	254.711	0.3	-1.4258
																		799	4	41.352	Block2353	0.49	364.639	1.1	-3.35171		799	4	41.352	Block2353	0.13	254.672	0.3	-1.46066
																		800	4	41.397	Block2354	0.48	364.714	1.1	-3.30845		800	4	41.397	Block2354	0.12	254.724	0.3	-1.40519
																		801	4	41.606	Block2355	0.49	364.639	1.1	-3.35171		801	4	41.606	Block2355	0.13	254.672	0.3	-1.46066
																		802	4	41.758	Block2356	0.48	364.714	1.1	-3.30845		802	4	41.758	Block2356	0.12	254.724	0.3	-1.40519
																		803	4	41.829	Block2357	0.49	364.639	1.1	-3.35171		803	4	41.829	Block2357	0.13	254.672	0.3	-1.46066
																		804	4	42.829		0.46	364.855	1.1	-3.2513		804	4	42.829		0.12	254.746	0.3	-1.38471
																		805	4	43.631	Block2358	0.43	365.074	1	-3.15786		805	4	43.631	Block2358	0.11	254.811	0.3	-1.31972
																		806	4	44.311	Block2359	0.45	364.978	1	-3.07246		806	4	44.311	Block2359	0.12	254.756	0.3	-1.32
																		807	4	44.351	Block2360	0.5	364.558	1.1	-3.24892		807	4	44.351	Block2360	0.14	254.618	0.3	-1.44921
																		808	4	44.406	Block2361	0.46	364.828	1.1	-3.19463		808	4	44.406	Block2361	0.13	254.7	0.3	-1.39892
																		809	4	44.442	Block2363	0.56	364.035	1.3	-3.3804		809	4	44.442	Block2363	0.23	254.124	0.5	-1.7934
																		810	4	44.466	Block2364	0.59	363.756	1.4	-3.42677		810	4	44.466	Block2364	0.24	254.028	0.6	-1.82922
																		811	4	44.514	Block2366	0.47	364.749	1.1	-3.17458		811	4	44.514	Block2366	0.14	254.631	0.3	-1.43787
																		812	4	44.603	Block2367	0.52	364.342	1.2	-3.32027		812	4	44.603	Block2367	0.18	254.377	0.4	-1.63915
																		813	4	44.674	Block2368	0.47	364.749	1.1	-3.17458		813	4	44.674	Block2368	0.14	254.631	0.3	-1.43787
																		814	4	44.758	Block2369	0.56	364.035	1.3	-3.3804		814	4	44.758	Block2369	0.23	254.124	0.5	-1.7934
																		815	4	45.392	Block2370	0.47	364.749	1.1	-3.17458		815	4	45.392	Block2370	0.14	254.631	0.3	-1.43787
																		816	4	45.443	Block2373	0.37	365.596	0.9	-2.81088		816	4	45.443	Block2373	0.23	254.108	0.5	-1.83189
																		817	4	45.463	Block2374	0.34	365.913	0.8	-2.71952		817	4	45.463	Block2374	0.15	254.596	0.3	-1.49264
																		818	4	45.697	Block2378	0.3	366.257	0.7	-2.5503		818	4	45.697	Block2378	0.08	254.963	0.2	-1.12947
																		819	4	45.834	Block2380	0.3	366.206	0.7	-2.48991		819	4	45.834	Block2380	0.23	254.088	0.5	-1.81906
																		820	4	45.954	Block2387	0.32	366.036	0.7	-2.13987		820	4	45.954	Block2387	0.46	252.729	1.1	-2.13771
																		821	4	45.991	Block2390	0.34	365.897	0.8	-2.71765		821	4	45.991	Block2390	0.11	254.828	0.2	-1.27082
																		822	4	46.157	Block2396	0.9	361.187	2.1	-4.22098		822	4	46.157	Block2396	0.6	251.941	1.4	-2.87398
																		823	4	46.201	Block2397	0.86	361.484	2	-4.2096		823	4	46.201	Block2397	0.55	252.205	1.3	-2.81242
																		824	4	46.34	Block2405	0.84	361.636	1.9	-4.21389		824	4	46.34	Block2405	0.73	251.168	1.7	-3.26738
																		825	4	46.46	Block2407	0.91	361.095	2.1	-4.30895		825	4	46.46	Block2407	0.9	250.182	2.1	-3.57244
																		826	4	46.582	Block2413	1.13	359.237	2.6	-4.67751		826	4	46.582	Block2413	0.9	250.193	2.1	-3.47576
																		827	4	46.772	Block2415	0.99	360.425	2.3	-4.20777		827	4	46.772	Block2415	0.81	250.699	1.9	-3.17734
																		828	4	46.921	Block2420	0.84	361.682	1.9	-4.03359		828	4	46.921	Block2420	0.61	251.86	1.4	-2.87343
																		829	4	47.047	Block2425	1.13	359.211	2.6	-4.66372		829	4	47.047	Block2425	0.64	251.707	1.5	-2.92109
																		830	4	47.144	Block2428	1.25	358.229	2.9	-4.73817		830	4	47.144	Block2428	1.06	249.26	2.4	-3.63303
																		831	4	47.327	Block2433	1.02	360.127	2.3	-3.69952		831	4	47.327	Block2433	1.17	248.623	2.7	-3.28969
																		832	4	47.362	Block2434	1.13	359.245	2.6	-3.88061		832	4	47.362	Block2434	1.3	247.904	3	-3.45567
																		833	4	47.429	Block2436	1.05	359.924	2.4	-3.77607		833	4	47.429	Block2436	1.21	248.391	2.8	-3.37497
																		834	4	47.589	Block2437	0.96	360.696	2.2	-4.26238		834	4	47.589	Block2437	0.55	252.201	1.3	-2.70674
																		835	4	48.182	Block2443	0.56	364.009	1.3	-3.2727		835	4	48.182	Block2443	0.32	253.585	0.7	-2.05185
																		836	4	48.674	Block2448	0.66	363.171	1.5	-3.4043		836	4	48.674	Block2448	0.68	251.485	1.6	-2.86736
																		837	4	49.312	Block2452	0.01	368.675	0	-0.598975		837	4	49.312	Block2452	0.39	253.149	0.9	-2.98591
																		838	4	49.422	Block2453	0.05	368.37	0.1	-1.23313		838	4	49.422	Block2453	0.55	252.242	1.3	-3.50312
																		839	4	49.561	Block2454	0.02	368.622	0	-0.769959		839	4	49.561	Block2454	0.39	253.175	0.9	-3.04823
																		840	4	49.628	Block2456	0.16	367.427	0.4	-2.4393		840	4	49.628	Block2456	0.56	252.194	1.3	-3.8044
																		841	4	49.678	Block2461	0.1	367.955	0.2	-2.1695		841	4	49.678	Block2461	0.19	254.358	0.4	-2.52149
																		842	4	49.928	Block2462	0.08	368.118	0.2	-1.7633		842	4	49.928	Block2462	0.13	254.669	0.3	-1.94047
																		843	4	50.028	Block2464	0.01	368.663	0	-0.733934		843	4	50.028	Block2464	0.06	255.121	0.1	-1.31016
																		844	4	50.068	Block2465	0	368.753	0	-0.267541		844	4	50.068	Block2465	0.02	255.33	0	-0.76779
																		845	4	50.09	Block2466	0	368.762	0	0.160517		845	4	50.09	Block2466	0.01	255.411	0	-0.442469
																		846	4	50.258	Block2467	0.01	368.695	0	-0.547767		846	4	50.258	Block2467	0.09	254.934	0.2	-1.46193
																		847	4	51.166	Block2475	0.2	367.092	0.5	1.77167		847	4	51.166	Block2475	0.01	255.377	0	-0.385249
																		848	4	51.206	Block2476	0.28	366.378	0.6	2.14195		848	4	51.206	Block2476	0	255.451	0	0.0981483
																		849	4	51.595	Block2486	0.61	363.569	1.4	3.56587		849	4	51.595	Block2486	0.3	253.701	0.7	2.07186
																		850	4	52.123	Block2487	0.35	365.792	0.8	2.15055		850	4	52.123	Block2487	0.01	255.409	0	0.269409
																		851	5	0.021	Block2488	0.32	366.048	0.7	-3.08531		851	5	0.021	Block2488	0.65	251.652	1.5	-3.64869
																		852	5	0.219	Block2493	0.47	364.792	1.1	-6.56275		852	5	0.219	Block2493	0.48	252.64	1.1	-5.52303
																		853	5	0.532	Block2497	0.43	365.101	1	-11.1032		853	5	0.532	Block2497	0	255.439	0	0.761375
																		854	5	0.948	Block2500	0.41	365.26	1	-8.43153		854	5	0.948	Block2500	0	255.444	0	-0.487769
																		855	5	1.151	Block2501	0.31	366.114	0.7	-7.71416		855	5	1.151	Block2501	0	255.43	0	0.761608
																		856	5	1.283	Block2502	0.41	365.26	1	-8.43153		856	5	1.283	Block2502	0	255.444	0	-0.487769
																		857	5	2.184	Block2506	0.12	367.724	0.3	-2.31449		857	5	2.184	Block2506	0.06	255.093	0.1	-1.3643
																		858	5	2.269	Block2507	0.07	368.188	0.2	-1.79031		858	5	2.269	Block2507	0.08	255.003	0.2	-1.5828
																		859	5	2.51	Block2509	0.15	367.449	0.4	-2.73125		859	5	2.51	Block2509	0.09	254.921	0.2	-1.7398
																		860	5	2.545	Block2510	0.27	366.442	0.6	-3.83033		860	5	2.545	Block2510	0.17	254.428	0.4	-2.54599
																		861	5	2.696	Block2511	0.37	365.63	0.9	-4.66353		861	5	2.696	Block2511	0.23	254.129	0.5	-3.03243
																		862	5	2.733	Block2512	0.26	366.539	0.6	-4.39031		862	5	2.733	Block2512	0.09	254.924	0.2	-2.14535
																		863	5	2.763	Block2515	0.47	364.745	1.1	-5.35983		863	5	2.763	Block2515	0.22	254.183	0.5	-3.01491
																		864	5	2.851	Block2516	0.19	367.141	0.4	-3.98433		864	5	2.851	Block2516	0.01	255.372	0	-0.90382
																		865	5	3.395	Block2518	0.27	366.481	0.6	-4.5331		865	5	3.395	Block2518	0.08	254.988	0.2	-2.05082
																		866	5	3.54	Block2520	0.34	365.84	0.8	-5.12902		866	5	3.54	Block2520	0.15	254.589	0.3	-2.7912
																		867	5	3.561	Block2521	0.3	366.198	0.7	-5.15034		867	5	3.561	Block2521	0.11	254.797	0.3	-2.60832
																		868	5	3.657	Block2523	0.52	364.325	1.2	-5.04155		868	5	3.657	Block2523	0.27	253.884	0.6	-2.99889
																		869	5	3.702	Block2524	0.63	363.451	1.4	-5.5791		869	5	3.702	Block2524	0.28	253.79	0.7	-3.12342
																		870	5	3.788	Block2525	0.44	365.073	1	-4.70686		870	5	3.788	Block2525	0.15	254.551	0.4	-2.3298
																		871	5	3.812	Block2526	0.37	365.644	0.8	-4.38251		871	5	3.812	Block2526	0.11	254.784	0.3	-2.03165
																		872	5	4.004	Block2527	0.45	364.934	1	-4.73767		872	5	4.004	Block2527	0.22	254.184	0.5	-2.72918
																		873	5	4.114	Block2529	0.37	365.644	0.8	-4.38251		873	5	4.114	Block2529	0.11	254.784	0.3	-2.03165
																		874	5	4.485	Block2530	0.52	364.343	1.2	-5.53768		874	5	4.485	Block2530	0.21	254.219	0.5	-2.92795
																		875	5	4.808	Block2531	0.59	363.759	1.4	-4.62466		875	5	4.808	Block2531	0.17	254.463	0.4	-2.05897
																		876	5	4.896	Block2532	0.4	365.37	0.9	-3.83982		876	5	4.896	Block2532	0.09	254.954	0.2	-1.47639
																		877	5	5.057	Block2533	0.45	364.956	1	-4.2329		877	5	5.057	Block2533	0.16	254.537	0.4	-2.07855
																		878	5	5.147	Block2536	0.74	362.524	1.7	-4.85372		878	5	5.147	Block2536	0.66	251.559	1.5	-3.83426
																		879	5	5.177	Block2537	0.74	362.524	1.7	-4.85372		879	5	5.177	Block2537	0.66	251.559	1.5	-3.83426
																		880	5	5.317	Block2543	0.3	366.25	0.7	-2.34779		880	5	5.317	Block2543	0.5	252.504	1.2	-2.54231
																		881	5	5.383	Block2546	0.21	367.009	0.5	-2.76261		881	5	5.383	Block2546	0.07	255.057	0.2	-1.31502
																		882	5	5.546	Block2548	0.4	365.38	0.9	-3.77413		882	5	5.546	Block2548	0.16	254.484	0.4	-2.02174
																		883	5	5.583	Block2550	0.21	367.009	0.5	-2.76261		883	5	5.583	Block2550	0.07	255.057	0.2	-1.31502
																		884	5	5.951	Block2552	0.1	367.937	0.2	-1.81754		884	5	5.951	Block2552	0.03	255.292	0.1	-0.806043
																		885	5	6.258	Block2553	0.13	367.695	0.3	-1.99804		885	5	6.258	Block2553	0.08	255.01	0.2	-1.28741
																		886	5	6.349	Block2555	0.24	366.698	0.6	-2.88943		886	5	6.349	Block2555	0.14	254.653	0.3	-1.79993
																		887	5	6.771	Block2556	0.36	365.674	0.8	-3.48246		887	5	6.771	Block2556	0.24	254.028	0.6	-2.36537
																		888	5	6.869	Block2571	0.24	366.698	0.6	-2.88943		888	5	6.869	Block2571	0.14	254.653	0.3	-1.79993
																		889	5	7.416	Block2572	0.23	366.815	0.5	-2.78637		889	5	7.416	Block2572	0.11	254.796	0.3	-1.61906
																		890	5	7.458	Block2573	0.24	366.698	0.6	-2.88943		890	5	7.458	Block2573	0.14	254.653	0.3	-1.79993
																		891	5	8.17	Block2576	0.14	367.59	0.3	-2.13394		891	5	8.17	Block2576	0.07	255.053	0.2	-1.24807
																		892	5	8.322	Block2578	0.16	367.417	0.4	-2.2408		892	5	8.322	Block2578	0.07	255.065	0.2	-1.20483
																		893	5	8.77	Block2581	0.27	366.504	0.6	-2.73418		893	5	8.77	Block2581	0.03	255.301	0.1	-0.715474
																		894	5	8.812	Block2582	0.01	368.692	0	-0.469109		894	5	8.812	Block2582	0.02	255.308	0.1	-0.652219
																		895	5	8.835	Block2584	0	368.75	0	0.222656		895	5	8.835	Block2584	0.02	255.359	0	-0.52323
																		896	5	9.448	Block2589	0.24	366.698	0.6	-2.88943		896	5	9.448	Block2589	0.14	254.653	0.3	-1.79993
																		897	5	10.189	Block2590	0.27	366.495	0.6	-3.0061		897	5	10.189	Block2590	0.1	254.861	0.2	-1.53716
																		898	5	10.217	Block2591	0.24	366.698	0.6	-2.88943		898	5	10.217	Block2591	0.14	254.653	0.3	-1.79993
																		899	5	10.665	Block2594	0.18	367.263	0.4	-2.41173		899	5	10.665	Block2594	0.03	255.288	0.1	-0.805154
																		900	5	10.765	Block2597	0.16	367.417	0.4	-2.22687		900	5	10.765	Block2597	0.05	255.15	0.1	-1.05996
																		901	5	10.836	Block2598	0.21	366.968	0.5	-2.61988		901	5	10.836	Block2598	0.12	254.732	0.3	-1.66176
																		902	5	10.9	Block2600	0.24	366.698	0.6	-2.88943		902	5	10.9	Block2600	0.14	254.653	0.3	-1.79993
																		903	5	11.784	Block2604	0	368.766	0	0.0635184		903	5	11.784	Block2604	0	255.456	0	0.0275557
																		904	5	11.921	Block2605	0	368.762	0	0.126764		904	5	11.921	Block2605	0	255.456	0	-0.0010197
																		905	5	11.991	Block2606	0.01	368.706	0	0.412469		905	5	11.991	Block2606	0	255.452	0	0.103549
																		906	5	12.991		0	368.76	0	0.147687		906	5	12.991		0	255.456	0	0.00657675
																		907	5	13.069	Block2607	0	368.762	0	0.126764		907	5	13.069	Block2607	0	255.456	0	-0.0010197
																		908	5	14.069		0	368.766	0	0.0657274		908	5	14.069		0	255.456	0	0.0265592
																		909	5	14.105	Block2608	0	368.766	0	0.0635184		909	5	14.105	Block2608	0	255.456	0	0.0275557
																		910	5	15.105		0.12	367.687	0.3	-1.87109		910	5	15.105		0	255.444	0	-0.192882
																		911	5	15.147	Block2612	0.13	367.623	0.3	-1.93549		911	5	15.147	Block2612	0	255.444	0	-0.200099
																		912	5	15.426	Block2613	0.09	367.992	0.2	-1.54856		912	5	15.426	Block2613	0	255.456	0	-0.0156577
																		913	5	15.452	Block2614	0.09	367.992	0.2	-1.54856		913	5	15.452	Block2614	0	255.456	0	-0.0156577
																		914	5	15.499	Block2615	0.04	368.44	0.1	-1.00298		914	5	15.499	Block2615	0	255.44	0	0.219517
																		915	5	15.623	Block2617	0	368.765	0	0.0950436		915	5	15.623	Block2617	0	255.453	0	0.0885877
																		916	5	16.307	Block2618	0	368.768	0	-0.0180713		916	5	16.307	Block2618	0	255.431	0	-0.266318
																		917	5	16.481	Block2619	0	368.766	0	-0.0752219		917	5	16.481	Block2619	0.04	255.231	0.1	-0.804272
																		918	5	16.602	Block2622	0.02	368.634	0	-0.627602		918	5	16.602	Block2622	0.05	255.181	0.1	-0.899844
																		919	5	16.646	Block2624	0.02	368.632	0	-0.645423		919	5	16.646	Block2624	0.06	255.112	0.1	-1.02732
																		920	5	17.073	Block2625	0.03	368.521	0.1	-0.866295		920	5	17.073	Block2625	0.05	255.17	0.1	-0.933559
																		921	5	17.508	Block2629	0	368.766	0	0.0635184		921	5	17.508	Block2629	0	255.456	0	0.0275557
																		922	5	18.508		0	368.747	0	0.241653		922	5	18.508		0.01	255.402	0	0.386925
																		923	5	19.508	Block2630	0.01	368.707	0	0.414225		923	5	19.508	Block2630	0.03	255.262	0.1	0.739157
																		924	5	19.562	Block2632	0	368.759	0	0.162269		924	5	19.562	Block2632	0.01	255.387	0	0.444004
																		925	5	19.89	Block2636	0	368.763	0	-0.110905		925	5	19.89	Block2636	0	255.456	0	0.011532
																		926	5	20.274	Block2637	0	368.766	0	0.0635184		926	5	20.274	Block2637	0	255.456	0	0.0275557
																		927	5	20.315	Block2638	0.01	368.723	0	0.350531		927	5	20.315	Block2638	0	255.45	0	0.132407
																		928	5	21.315		0	368.762	0	0.123129		928	5	21.315		0	255.455	0	0.0492336
																		929	5	21.574	Block2639	0	368.766	0	0.0635184		929	5	21.574	Block2639	0	255.456	0	0.0275557
																		930	5	22.574		0	368.763	0	0.112439		930	5	22.574		0	255.456	0	0.00546635
																		931	5	22.869	Block2640	0	368.762	0	0.126764		931	5	22.869	Block2640	0	255.456	0	-0.0010197
																		932	5	23.072	Block2641	0.01	368.706	0	0.412469		932	5	23.072	Block2641	0	255.452	0	0.103549
																		933	5	23.773	Block2642	0	368.762	0	0.126764		933	5	23.773	Block2642	0	255.456	0	-0.0010197
																		934	5	24.773		0.05	368.232	0.1	-1.28218		934	5	24.773		0.03	255.205	0.1	-0.876429
																		935	5	25.773		0.24	366.715	0.6	-2.86633		935	5	25.773		0.13	254.657	0.3	-1.78811
																		936	5	25.793	Block2649	0.24	366.698	0.6	-2.88943		936	5	25.793	Block2649	0.14	254.653	0.3	-1.79993
																		937	5	26.793		0.06	368.159	0.2	0.903308		937	5	26.793		0.03	255.195	0.1	0.59145
																		938	5	27.062	Block2659	0.11	367.869	0.2	1.03855		938	5	27.062	Block2659	0.06	255.09	0.1	0.662445
																		939	5	27.164	Block2675	0.16	367.394	0.4	-2.32045		939	5	27.164	Block2675	0.1	254.878	0.2	-1.50469
																		940	5	27.226	Block2677	0.24	366.698	0.6	-2.88943		940	5	27.226	Block2677	0.14	254.653	0.3	-1.79993
																		941	5	27.551	Block2678	0.1	367.956	0.2	-1.74845		941	5	27.551	Block2678	0.17	254.479	0.4	-1.91742
																		942	5	27.759	Block2705	0.09	367.978	0.2	0.969688		942	5	27.759	Block2705	0.05	255.159	0.1	0.593965
																		943	5	27.787	Block2707	0.09	367.978	0.2	0.969688		943	5	27.787	Block2707	0.05	255.159	0.1	0.593965
																		944	5	27.853	Block2717	0.17	367.286	0.4	1.32793		944	5	27.853	Block2717	0.11	254.782	0.3	0.89539
																		945	5	27.934	Block2720	0.23	366.833	0.5	-2.6344		945	5	27.934	Block2720	0.14	254.624	0.3	-1.72768
																		946	5	28.207	Block2721	0.28	366.42	0.6	-2.9753		946	5	28.207	Block2721	0.13	254.679	0.3	-1.71106
																		947	5	28.394	Block2722	0.23	366.833	0.5	-2.6344		947	5	28.394	Block2722	0.14	254.624	0.3	-1.72768
																		948	5	28.416	Block2723	0.28	366.42	0.6	-2.9753		948	5	28.416	Block2723	0.13	254.679	0.3	-1.71106
																		949	5	28.469	Block2725	0.28	366.42	0.6	-2.9753		949	5	28.469	Block2725	0.13	254.679	0.3	-1.71106
																		950	5	29.298	Block2726	0.53	364.295	1.2	-4.24744		950	5	29.298	Block2726	0.24	254.038	0.6	-2.39178
																		951	5	29.532	Block2727	0.52	364.34	1.2	-4.16588		951	5	29.532	Block2727	0.24	254.031	0.6	-2.3634
																		952	5	29.61	Block2728	0.4	365.374	0.9	-3.62197		952	5	29.61	Block2728	0.16	254.494	0.4	-1.92798
																		953	5	29.69	Block2730	0.37	365.63	0.9	-3.31396		953	5	29.69	Block2730	0.15	254.55	0.4	-1.78076
																		954	5	29.792	Block2733	0.31	366.107	0.7	-2.98256		954	5	29.792	Block2733	0.16	254.493	0.4	-1.79399
																		955	5	29.921	Block2735	0.4	365.374	0.9	-3.62197		955	5	29.921	Block2735	0.16	254.494	0.4	-1.92798
																		956	5	29.964	Block2736	0.34	365.836	0.8	-3.3899		956	5	29.964	Block2736	0.13	254.695	0.3	-1.72725
																		957	5	30.046	Block2738	0.53	364.295	1.2	-4.24744		957	5	30.046	Block2738	0.24	254.038	0.6	-2.39178
																		958	5	30.449	Block2739	0.52	364.376	1.2	-4.33069		958	5	30.449	Block2739	0.24	254.036	0.6	-2.46238
																		959	5	31.449		1.69	352.557	4.4	-7.00151		959	5	31.449		0.7	250.983	1.8	-3.67935
																		960	5	31.715	Block2740	1.72	354.399	3.9	-6.39319		960	5	31.715	Block2740	0.76	250.987	1.7	-3.56533
																		961	5	31.885	Block2757	0.03	368.49	0.1	0.581166		961	5	31.885	Block2757	0	255.448	0	-0.0946536
																		962	5	31.942	Block2760	0.01	368.721	0	0.247586		962	5	31.942	Block2760	0.05	255.177	0.1	-0.60372
																		963	5	32.042	Block2766	0.12	367.764	0.3	1.06732		963	5	32.042	Block2766	0	255.454	0	-0.0428269
																		964	5	32.099	Block2772	0.12	367.764	0.3	1.06732		964	5	32.099	Block2772	0	255.454	0	-0.0428269
																		965	5	32.307	Block2775	0.33	365.985	0.8	1.82251		965	5	32.307	Block2775	0	255.432	0	0.167441
																		966	5	32.336	Block2776	0.28	366.429	0.6	1.66975		966	5	32.336	Block2776	0	255.454	0	0.0429186
																		967	5	32.37	Block2782	1.27	358.116	2.9	-5.83809		967	5	32.37	Block2782	0.81	250.722	1.9	-3.89189
																		968	5	32.613	Block2784	1.26	358.207	2.9	-6.11672		968	5	32.613	Block2784	0.65	251.649	1.5	-3.67264
																		969	5	32.764	Block2786	1.03	360.071	2.4	-5.27531		969	5	32.764	Block2786	0.52	252.401	1.2	-3.1265
																		970	5	32.909	Block2787	0.8	362.035	1.8	-4.77133		970	5	32.909	Block2787	0.43	252.949	1	-2.91132
																		971	5	33.141	Block2792	0.51	364.422	1.2	-2.9482		971	5	33.141	Block2792	0.72	251.216	1.7	-2.9118
																		972	5	33.28	Block2793	0.6	363.717	1.4	-3.17186		972	5	33.28	Block2793	0.83	250.582	1.9	-3.11576
																		973	5	33.382	Block2796	0.42	365.224	1	-2.78571		973	5	33.382	Block2796	0.46	252.739	1.1	-2.43889
																		974	5	33.426	Block2797	0.5	364.512	1.2	-3.00474		974	5	33.426	Block2797	0.55	252.247	1.3	-2.60934
																		975	5	33.451	Block2799	0.92	360.967	2.1	-5.42348		975	5	33.451	Block2799	0.37	253.259	0.9	-2.8783
																		976	5	33.507	Block2801	1.01	360.279	2.3	-5.29775		976	5	33.507	Block2801	0	255.456	0	-0.0139589
																		977	5	33.683	Block2803	0.96	360.685	2.2	-5.08557		977	5	33.683	Block2803	0	255.442	0	0.211603
																		978	5	33.755	Block2804	1	360.354	2.3	-5.05654		978	5	33.755	Block2804	0	255.453	0	-0.0875998
																		979	5	33.831	Block2807	1.29	357.897	2.9	-5.52671		979	5	33.831	Block2807	0.07	255.055	0.2	-1.06137
																		980	5	33.888	Block2808	0.91	361.065	2.1	-4.75806		980	5	33.888	Block2808	0.24	254.049	0.6	-2.03334
																		981	5	34.005	Block2809	0.96	360.662	2.2	-4.95463		981	5	34.005	Block2809	0.26	253.951	0.6	-2.1348
																		982	5	34.156	Block2811	1.02	360.141	2.3	-5.11138		982	5	34.156	Block2811	0.27	253.849	0.6	-2.20632
																		983	5	34.202	Block2815	0.73	362.622	1.7	-3.57844		983	5	34.202	Block2815	0.51	252.482	1.2	-2.48929
																		984	5	34.223	Block2816	0.5	364.53	1.1	-2.86055		984	5	34.223	Block2816	0.35	253.422	0.8	-1.98184
																		985	5	34.292	Block2817	0.78	362.205	1.8	-3.60843		985	5	34.292	Block2817	0.54	252.276	1.2	-2.51185
																		986	5	34.315	Block2818	0.68	363.044	1.6	-3.41787		986	5	34.315	Block2818	0.49	252.56	1.1	-2.43106
																		987	5	34.404	Block2819	0.7	362.882	1.6	-3.5174		987	5	34.404	Block2819	0.39	253.187	0.9	-2.18382
																		988	5	34.442	Block2824	0.99	360.456	2.3	-5.26326		988	5	34.442	Block2824	0.35	253.403	0.8	-2.61561
																		989	5	34.463	Block2826	0.92	360.977	2.1	-5.56502		989	5	34.463	Block2826	0.11	254.813	0.3	-1.59909
																		990	5	34.502	Block2827	0.84	361.655	1.9	-5.35615		990	5	34.502	Block2827	0.08	254.978	0.2	-1.38847
																		991	5	34.627	Block2828	0.77	362.236	1.8	-5.09558		991	5	34.627	Block2828	0.06	255.084	0.1	-1.21555
																		992	5	34.696	Block2829	0.85	361.584	1.9	-5.30624		992	5	34.696	Block2829	0.09	254.937	0.2	-1.42591
																		993	5	35.006	Block2830	0.85	361.566	2	-5.17695		993	5	35.006	Block2830	0.11	254.826	0.2	-1.5305
																		994	5	35.032	Block2831	0.77	362.279	1.8	-4.88236		994	5	35.032	Block2831	0.08	254.971	0.2	-1.33458
																		995	5	35.053	Block2832	0.66	363.159	1.5	-4.48326		995	5	35.053	Block2832	0.07	255.047	0.2	-1.21006
																		996	5	35.157	Block2833	0.77	362.279	1.8	-4.88236		996	5	35.157	Block2833	0.08	254.971	0.2	-1.33458
																		997	5	35.184	Block2834	1.16	359.038	2.6	-5.80147		997	5	35.184	Block2834	0	255.447	0	-0.170213
																		998	5	35.255	Block2840	1.87	353.124	4.2	-7.23413		998	5	35.255	Block2840	0.17	254.444	0.4	-1.83966
																		999	5	35.298	Block2842	2.29	349.761	5.2	-7.85137		999	5	35.298	Block2842	0.33	253.522	0.8	-2.50472
																		1000	5	35.336	Block2844	1.87	353.124	4.2	-7.23413		1000	5	35.336	Block2844	0.17	254.444	0.4	-1.83966
																		1001	5	35.388	Block2846	1.51	356.125	3.4	-6.61325		1001	5	35.388	Block2846	0.07	255.032	0.2	-1.21145
																		1002	5	35.452	Block2850	1.63	355.152	3.7	-6.43838		1002	5	35.452	Block2850	0.3	253.665	0.7	-2.33481
																		1003	5	35.484	Block2851	1.5	356.224	3.4	-6.0632		1003	5	35.484	Block2851	0.26	253.901	0.6	-2.13503
																		1004	5	35.566	Block2852	1.27	358.095	2.9	-5.61487		1004	5	35.566	Block2852	0.17	254.45	0.4	-1.72368
																		1005	5	35.659	Block2853	1.16	358.994	2.7	-5.39513		1005	5	35.659	Block2853	0.13	254.674	0.3	-1.52596
																		1006	5	35.689	Block2858	1.49	356.25	3.4	-6.33238		1006	5	35.689	Block2858	0.1	254.884	0.2	-1.35358
																		1007	5	35.756	Block2859	1.26	358.18	2.9	-5.85387		1007	5	35.756	Block2859	0.04	255.207	0.1	-0.898341
																		1008	5	35.895	Block2862	1.49	356.247	3.4	-5.67499		1008	5	35.895	Block2862	0.32	253.558	0.7	-2.2092
																		1009	5	36.112	Block2867	1.59	355.479	3.6	-5.64856		1009	5	36.112	Block2867	0.54	252.294	1.2	-2.75512
																		1010	5	36.267	Block2870	1.64	355.015	3.7	-5.87218		1010	5	36.267	Block2870	0.43	252.923	1	-2.52018
																		1011	5	36.318	Block2871	1.41	356.917	3.2	-6.09474		1011	5	36.318	Block2871	0.1	254.893	0.2	-1.3284
																		1012	5	36.436	Block2873	1.48	356.342	3.4	-6.63478		1012	5	36.436	Block2873	0.04	255.216	0.1	-0.922106
																		1013	5	36.584	Block2874	1.11	359.444	2.5	-5.58303		1013	5	36.584	Block2874	0.06	255.083	0.1	-1.11699
																		1014	5	36.931	Block2876	0.61	363.573	1.4	-4.54425		1014	5	36.931	Block2876	0	255.449	0	0.160791
																		1015	5	37.029	Block2879	0.74	362.525	1.7	-4.64724		1015	5	37.029	Block2879	0.04	255.218	0.1	-0.90725
																		1016	5	37.187	Block2880	0.45	364.957	1	-3.53046		1016	5	37.187	Block2880	0.01	255.406	0	-0.402478
																		1017	5	38.187		0.51	363.49	1.4	-3.3072		1017	5	38.187		0.03	255.251	0.1	0.656667
																		1018	5	38.536	Block2885	0.41	365.246	1	-2.57858		1018	5	38.536	Block2885	0.05	255.167	0.1	0.73814
																		1019	5	38.62	Block2886	0.43	365.137	1	-2.64804		1019	5	38.62	Block2886	0.07	255.043	0.2	0.893315
																		1020	5	38.688	Block2887	0.49	364.641	1.1	-2.81797		1020	5	38.688	Block2887	0.06	255.101	0.1	0.826871
																		1021	5	38.807	Block2888	0.43	365.137	1	-2.64804		1021	5	38.807	Block2888	0.07	255.043	0.2	0.893315
																		1022	5	38.891	Block2889	0.49	364.632	1.1	-2.85909		1022	5	38.891	Block2889	0.03	255.302	0.1	0.552316
																		1023	5	39.356	Block2891	0.4	365.33	0.9	-2.64325		1023	5	39.356	Block2891	0.03	255.262	0.1	0.628187
																		1024	5	39.424	Block2892	0.5	364.493	1.2	-2.90676		1024	5	39.424	Block2892	0	255.45	0	0.103384
																		1025	5	39.587	Block2895	0.1	367.913	0.2	-1.3581		1025	5	39.587	Block2895	0	255.456	0	0.00540423
																		1026	5	39.671	Block2897	0.04	368.454	0.1	-0.852029		1026	5	39.671	Block2897	0.1	254.891	0.2	-1.1435
																		1027	5	39.761	Block2900	0.05	368.377	0.1	-0.989787		1027	5	39.761	Block2900	0.04	255.243	0.1	-0.731024
																		1028	5	39.9	Block2904	0	368.752	0	0.201697		1028	5	39.9	Block2904	0	255.456	0	0.0248097
																		1029	5	39.961	Block2905	0.02	368.613	0	-0.632934		1029	5	39.961	Block2905	0.02	255.352	0	-0.518989
																		1030	5	40.005	Block2909	0.02	368.603	0	-0.694033		1030	5	40.005	Block2909	0.01	255.383	0	-0.461003
																		1031	5	40.051	Block2911	0	368.758	0	-0.171665		1031	5	40.051	Block2911	0	255.452	0	0.0996229
																		1032	5	40.086	Block2912	0.01	368.722	0	-0.364653		1032	5	40.086	Block2912	0	255.448	0	-0.147009
																		1033	5	40.134	Block2914	0.01	368.722	0	-0.364653		1033	5	40.134	Block2914	0	255.448	0	-0.147009
																		1034	5	40.162	Block2917	0.05	368.314	0.1	1.09481		1034	5	40.162	Block2917	0.01	255.42	0	0.30917
																		1035	5	40.193	Block2918	0.04	368.459	0.1	0.888942		1035	5	40.193	Block2918	0	255.453	0	0.082864
																		1036	5	40.246	Block2921	0.03	368.522	0.1	0.788011		1036	5	40.246	Block2921	0	255.444	0	-0.17477
																		1037	5	40.27	Block2922	0.01	368.647	0	0.555042		1037	5	40.27	Block2922	0.01	255.411	0	-0.336159
																		1038	5	40.304	Block2923	0.03	368.533	0.1	0.77583		1038	5	40.304	Block2923	0	255.456	0	-0.00968221
																		1039	5	40.436	Block2928	0.01	368.677	0	-0.515986		1039	5	40.436	Block2928	0.01	255.425	0	-0.302085
																		1040	5	40.654	Block2930	0.02	368.63	0	-0.626341		1040	5	40.654	Block2930	0.01	255.401	0	-0.394132
																		1041	5	40.7	Block2933	0.01	368.677	0	-0.515986		1041	5	40.7	Block2933	0.01	255.425	0	-0.302085
																		1042	5	40.914	Block2934	0.02	368.591	0	-0.705826		1042	5	40.914	Block2934	0	255.44	0	-0.210876
																		1043	5	40.945	Block2935	0.01	368.677	0	-0.515986		1043	5	40.945	Block2935	0.01	255.425	0	-0.302085
																		1044	5	41.121	Block2936	0.02	368.557	0.1	-0.78185		1044	5	41.121	Block2936	0.01	255.402	0	-0.394993
																		1045	5	41.172	Block2937	0.01	368.648	0	-0.592502		1045	5	41.172	Block2937	0	255.448	0	-0.150525
																		1046	5	41.272	Block2948	0.01	368.723	0	0.340337		1046	5	41.272	Block2948	0.03	255.3	0.1	0.632002
																		1047	5	41.336	Block2952	0.02	368.56	0.1	0.704777		1047	5	41.336	Block2952	0	255.449	0	0.127588
																		1048	5	41.4	Block2956	0	368.75	0	-0.215508		1048	5	41.4	Block2956	0	255.444	0	0.171152
																		1049	5	41.426	Block2959	0.01	368.643	0	-0.604274		1049	5	41.426	Block2959	0	255.432	0	-0.263827
																		1050	5	41.912	Block2961	0.02	368.62	0	-0.649294		1050	5	41.912	Block2961	0	255.441	0	-0.207641
																		1051	5	42.027	Block2963	0.01	368.643	0	-0.604274		1051	5	42.027	Block2963	0	255.432	0	-0.263827
																		1052	5	42.194	Block2965	0.01	368.643	0	-0.604274		1052	5	42.194	Block2965	0	255.432	0	-0.263827
																		1053	6	0.002	Block2966	0	368.761	0	-0.180157		1053	6	0.002	Block2966	0	255.455	0	0.0635414
																		1054	6	0.163	Block2967	0	368.765	0	0.109967		1054	6	0.163	Block2967	0	255.438	0	0.284006
																		1055	6	0.319	Block2968	0.01	368.671	0	0.65		1055	6	0.319	Block2968	0.02	255.337	0	0.719461
																		1056	6	0.453	Block2970	0.01	368.642	0	0.693687		1056	6	0.453	Block2970	0.04	255.206	0.1	0.976737
																		1057	6	0.507	Block2971	0.02	368.612	0	0.79343		1057	6	0.507	Block2971	0.04	255.234	0.1	0.946506
																		1058	6	0.592	Block2972	0	368.747	0	0.30206		1058	6	0.592	Block2972	0.01	255.383	0	0.556739
																		1059	6	0.62	Block2973	0	368.736	0	0.373066		1059	6	0.62	Block2973	0.01	255.404	0	0.475236
																		1060	6	0.776	Block2974	0	368.765	0	0.109967		1060	6	0.776	Block2974	0	255.438	0	0.284006
																		1061	6	0.931	Block2976	0.02	368.639	0	-0.786581		1061	6	0.931	Block2976	0.01	255.416	0	-0.434502
																		1062	6	0.954	Block2978	0.01	368.702	0	-0.555673		1062	6	0.954	Block2978	0	255.443	0	-0.245846
																		1063	6	1.13	Block2980	0.01	368.716	0	-0.503899		1063	6	1.13	Block2980	0.01	255.392	0	-0.560451
																		1064	6	1.157	Block2981	0	368.763	0	-0.164877		1064	6	1.157	Block2981	0	255.452	0	0.138292
																		1065	6	1.202	Block2982	0.06	368.269	0.1	1.5684		1065	6	1.202	Block2982	0.03	255.298	0.1	0.882225
																		1066	6	1.233	Block2983	0.09	368.023	0.2	1.936		1066	6	1.233	Block2983	0.06	255.107	0.1	1.32529
																		1067	6	1.264	Block2984	0.22	366.874	0.5	3.23609		1067	6	1.264	Block2984	0	255.439	0	0.309397
																		1068	6	1.314	Block2985	0.16	367.41	0.4	2.61332		1068	6	1.314	Block2985	0	255.45	0	-0.165824
																		1069	6	1.444	Block2986	0.43	365.093	1	4.11873		1069	6	1.444	Block2986	0	255.448	0	0.18889
																		1070	6	1.64	Block2988	0.4	365.403	0.9	3.9765		1070	6	1.64	Block2988	0	255.456	0	0.0115832
																		1071	6	1.749	Block2989	0.3	366.184	0.7	3.82251		1071	6	1.749	Block2989	0	255.448	0	0.212682
																		1072	6	2.72	Block2990	0.02	368.623	0	0.825944		1072	6	2.72	Block2990	0.1	254.892	0.2	-1.62746
																		1073	6	2.833	Block2991	0.04	368.468	0.1	1.14063		1073	6	2.833	Block2991	0	255.454	0	-0.0873548
																		1074	6	2.965	Block2992	0	368.748	0	0.306361		1074	6	2.965	Block2992	0.04	255.199	0.1	-1.09843
																		1075	6	3.22	Block2993	0.06	368.276	0.1	-1.90424		1075	6	3.22	Block2993	0.18	254.419	0.4	-2.76421
																		1076	6	3.273	Block2995	0.01	368.703	0	-0.733375		1076	6	3.273	Block2995	0.08	254.968	0.2	-2.0052
																		1077	6	3.311	Block2996	0.01	368.681	0	-0.829229		1077	6	3.311	Block2996	0.07	255.062	0.2	-1.76995
																		1078	6	3.424	Block2997	0.01	368.666	0	-0.853083		1078	6	3.424	Block2997	0.05	255.166	0.1	-1.4397
																		1079	6	3.47	Block2998	0.01	368.681	0	-0.829229		1079	6	3.47	Block2998	0.07	255.062	0.2	-1.76995
																		1080	6	3.541	Block2999	0	368.756	0	-0.306887		1080	6	3.541	Block2999	0.03	255.299	0.1	-1.13566
																		1081	6	3.612	Block3000	0.07	368.17	0.2	-2.18041		1081	6	3.612	Block3000	0.15	254.555	0.4	-2.6774
																		1082	6	3.657	Block3001	0	368.756	0	-0.306887		1082	6	3.657	Block3001	0.03	255.299	0.1	-1.13566
																		1083	6	4.185	Block3003	0.04	368.458	0.1	-1.41652		1083	6	4.185	Block3003	0.03	255.282	0.1	-1.0605
																		1084	6	4.293	Block3006	0	368.755	0	0.259079		1084	6	4.293	Block3006	0.05	255.151	0.1	-1.26537
																		1085	6	4.426	Block3009	0.06	368.228	0.1	-1.77797		1085	6	4.426	Block3009	0.15	254.582	0.3	-2.2614
																		1086	6	4.463	Block3011	0.04	368.458	0.1	-1.41652		1086	6	4.463	Block3011	0.03	255.282	0.1	-1.0605
																		1087	6	5.133	Block3012	0.04	368.458	0.1	-1.41652		1087	6	5.133	Block3012	0.03	255.282	0.1	-1.0605
																		1088	6	5.196	Block3014	0.04	368.442	0.1	-1.43396		1088	6	5.196	Block3014	0.03	255.287	0.1	-1.03082
																		1089	6	5.228	Block3015	0.04	368.458	0.1	-1.41652		1089	6	5.228	Block3015	0.03	255.282	0.1	-1.0605
																		1090	6	5.332	Block3020	0.11	367.847	0.2	-2.17919		1090	6	5.332	Block3020	0.28	253.816	0.6	-2.90791
																		1091	6	5.37	Block3021	0.08	368.123	0.2	-1.80632		1091	6	5.37	Block3021	0.24	254.034	0.6	-2.68204
																		1092	6	5.431	Block3026	0.04	368.458	0.1	-1.41652		1092	6	5.431	Block3026	0.03	255.282	0.1	-1.0605
																		1093	6	5.579	Block3028	0.08	368.111	0.2	-1.41309		1093	6	5.579	Block3028	0.01	255.425	0	-0.307489
																		1094	6	5.614	Block3029	0.09	368.029	0.2	-1.49078		1094	6	5.614	Block3029	0.01	255.372	0	-0.503397
																		1095	6	5.767	Block3033	0.41	365.324	0.9	-2.7325		1095	6	5.767	Block3033	0.51	252.434	1.2	-2.55943
																		1096	6	5.887	Block3036	0.33	365.943	0.8	-2.66868		1096	6	5.887	Block3036	0.34	253.467	0.8	-2.23937
																		1097	6	5.978	Block3041	0.49	364.602	1.1	-3.53687		1097	6	5.978	Block3041	0.45	252.806	1	-2.82056
																		1098	6	6.087	Block3043	0.57	363.9	1.3	-3.79202		1098	6	6.087	Block3043	0.54	252.284	1.2	-3.06114
																		1099	6	6.152	Block3045	0.55	364.134	1.3	-3.79717		1099	6	6.152	Block3045	0.37	253.272	0.9	-2.60679
																		1100	6	6.272	Block3049	0.3	366.258	0.7	-2.72333		1100	6	6.272	Block3049	0.2	254.292	0.5	-1.85403
																		1101	6	6.346	Block3050	0.36	365.696	0.8	-3.02655		1101	6	6.346	Block3050	0.24	254.034	0.6	-2.05912
																		1102	6	6.448	Block3051	0.43	365.139	1	-3.27413		1102	6	6.448	Block3051	0.26	253.909	0.6	-2.13759
																		1103	6	6.537	Block3052	0.56	363.999	1.3	-3.73701		1103	6	6.537	Block3052	0.38	253.247	0.9	-2.54312
																		1104	6	6.557	Block3053	0.49	364.633	1.1	-3.49534		1104	6	6.557	Block3053	0.35	253.393	0.8	-2.46867
																		1105	6	6.623	Block3054	0.36	365.696	0.8	-3.02655		1105	6	6.623	Block3054	0.24	254.034	0.6	-2.05912
																		1106	6	6.967	Block3060	0.33	365.953	0.8	-2.79043		1106	6	6.967	Block3060	0.35	253.4	0.8	-2.38511
																		1107	6	7.164	Block3067	0.22	366.868	0.5	-2.44048		1107	6	7.164	Block3067	0.12	254.751	0.3	-1.48591
																		1108	6	7.256	Block3071	0.4	365.396	0.9	-3.09701		1108	6	7.256	Block3071	0.09	254.952	0.2	-1.19683
																		1109	6	7.333	Block3072	0.35	365.795	0.8	-2.89568		1109	6	7.333	Block3072	0.07	255.064	0.2	-1.05138
																		1110	6	7.469	Block3073	0.42	365.188	1	-3.10902		1110	6	7.469	Block3073	0.09	254.913	0.2	-1.21118
																		1111	6	7.497	Block3074	0.47	364.76	1.1	-3.30249		1111	6	7.497	Block3074	0.11	254.785	0.3	-1.35127
																		1112	6	7.524	Block3075	0.48	364.67	1.1	-3.41434		1112	6	7.524	Block3075	0.08	254.959	0.2	-1.18825
																		1113	6	7.724	Block3082	0.57	363.897	1.3	-3.49311		1113	6	7.724	Block3082	0.25	253.977	0.6	-1.92494
																		1114	6	7.772	Block3085	0.39	365.463	0.9	-2.64187		1114	6	7.772	Block3085	0.16	254.488	0.4	-1.42933
																		1115	6	7.924	Block3089	0.29	366.323	0.7	-2.56906		1115	6	7.924	Block3089	0.03	255.296	0.1	-0.657649
																		1116	6	7.966	Block3091	0.44	365.023	1	-3.15573		1116	6	7.966	Block3091	0.1	254.86	0.2	-1.25856
																		1117	6	8.022	Block3094	0.9	361.161	2.1	-4.81258		1117	6	8.022	Block3094	0.32	253.583	0.7	-2.38814
																		1118	6	8.117	Block3097	0.73	362.556	1.7	-4.41252		1118	6	8.117	Block3097	0.19	254.317	0.4	-1.88914
																		1119	6	8.416	Block3101	1.1	359.534	2.5	-5.16715		1119	6	8.416	Block3101	0.47	252.68	1.1	-2.83289
																		1120	6	8.453	Block3104	1.28	358.019	2.9	-5.51133		1120	6	8.453	Block3104	0.69	251.386	1.6	-3.3912
																		1121	6	8.505	Block3105	1.11	359.415	2.5	-5.12234		1121	6	8.505	Block3105	0.62	251.791	1.4	-3.20667
																		1122	6	8.541	Block3108	0.93	360.914	2.1	-4.7466		1122	6	8.541	Block3108	0.44	252.895	1	-2.7105
																		1123	6	8.578	Block3111	0.73	362.556	1.7	-4.41252		1123	6	8.578	Block3111	0.19	254.317	0.4	-1.88914
																		1124	6	9.105	Block3112	0.38	365.566	0.9	-3.13703		1124	6	9.105	Block3112	0.06	255.108	0.1	-1.03382
																		1125	6	9.137	Block3113	0.33	365.971	0.8	-2.91836		1125	6	9.137	Block3113	0.04	255.203	0.1	-0.877972
																		1126	6	9.182	Block3114	0.66	363.149	1.5	-4.17606		1126	6	9.182	Block3114	0.16	254.501	0.4	-1.72152
																		1127	6	9.234	Block3115	0.73	362.556	1.7	-4.41252		1127	6	9.234	Block3115	0.19	254.317	0.4	-1.88914
																		1128	6	10.205	Block3119	0.84	361.656	1.9	-8.5199		1128	6	10.205	Block3119	0.11	254.83	0.2	-2.52763
																		1129	6	10.82	Block3120	0.85	361.57	2	-9.55795		1129	6	10.82	Block3120	0.03	255.259	0.1	-1.5809
																		1130	6	10.946	Block3125	0.59	363.797	1.3	-6.07696		1130	6	10.946	Block3125	0.13	254.68	0.3	-2.40118
																		1131	6	11.056	Block3128	0.85	361.57	2	-9.55795		1131	6	11.056	Block3128	0.03	255.259	0.1	-1.5809
																		1132	6	11.246	Block3129	0.22	366.883	0.5	-5.6341		1132	6	11.246	Block3129	0.05	255.143	0.1	2.29379
																		1133	6	11.27	Block3130	0.05	368.38	0.1	-1.68955		1133	6	11.27	Block3130	1.71	245.519	3.9	8.55539
																		1134	6	11.931	Block3131	0.02	368.577	0.1	-1.16884		1134	6	11.931	Block3131	1.76	245.253	4	8.53541
																		1135	6	11.971	Block3132	0.05	368.38	0.1	-1.68955		1135	6	11.971	Block3132	1.71	245.519	3.9	8.55539
																		1136	6	12.089	Block3133	0.01	368.697	0	-0.781045		1136	6	12.089	Block3133	1.53	246.557	3.5	8.72219
																		1137	6	12.141	Block3134	0.03	368.511	0.1	-1.45385		1137	6	12.141	Block3134	1.12	248.902	2.6	7.34854
																		1138	6	12.229	Block3135	0.01	368.661	0	0.822937		1138	6	12.229	Block3135	0.83	250.607	1.9	5.53066
																		1139	6	12.382	Block3142	0.09	367.971	0.2	1.37026		1139	6	12.382	Block3142	0.19	254.321	0.4	1.63564
																		1140	6	12.494	Block3149	0.09	368.031	0.2	1.85015		1140	6	12.494	Block3149	0.57	252.105	1.3	3.94491
																		1141	6	12.539	Block3152	0.02	368.633	0	0.709705		1141	6	12.539	Block3152	0.33	253.528	0.8	2.67845
																		1142	6	12.578	Block3158	0.15	367.517	0.3	1.74941		1142	6	12.578	Block3158	0.31	253.633	0.7	2.11119
																		1143	6	12.625	Block3162	0.04	368.467	0.1	1.39656		1143	6	12.625	Block3162	1.12	248.91	2.6	6.5127
																		1144	6	12.964	Block3165	0.1	367.933	0.2	2.45617		1144	6	12.964	Block3165	0.15	254.552	0.4	2.55483
																		1145	6	13.107	Block3166	0.11	367.844	0.3	2.81058		1145	6	13.107	Block3166	0.3	253.675	0.7	3.90186
																		1146	6	13.146	Block3169	0.17	367.321	0.4	3.05793		1146	6	13.146	Block3169	0.14	254.601	0.3	2.35145
																		1147	6	13.376	Block3175	0.05	368.359	0.1	1.48698		1147	6	13.376	Block3175	0.01	255.4	0	0.55205
																		1148	6	13.746	Block3181	0.01	368.649	0	0.540069		1148	6	13.746	Block3181	0.03	255.3	0.1	-0.617194
																		1149	6	14.073	Block3186	0.02	368.613	0	-1.06767		1149	6	14.073	Block3186	0	255.43	0	0.434003
																		1150	6	14.199	Block3187	0.11	367.844	0.3	2.81058		1150	6	14.199	Block3187	0.3	253.675	0.7	3.90186
																		1151	6	14.219	Block3188	0.07	368.212	0.2	2.14024		1151	6	14.219	Block3188	0.39	253.167	0.9	4.34243
																		1152	6	14.496	Block3190	0.18	367.225	0.4	3.4452		1152	6	14.496	Block3190	0.6	251.906	1.4	5.22535
																		1153	6	14.738	Block3192	0.18	367.225	0.4	3.4452		1153	6	14.738	Block3192	0.6	251.906	1.4	5.22535
																		1154	6	14.847	Block3203	0.08	368.106	0.2	-1.93548		1154	6	14.847	Block3203	0.02	255.359	0	0.73846
																		1155	6	14.959	Block3205	0.24	366.752	0.5	-3.20312		1155	6	14.959	Block3205	0.01	255.388	0	-0.58963
																		1156	6	15.021	Block3207	0.51	364.478	1.2	-4.71883		1156	6	15.021	Block3207	0.1	254.88	0.2	-1.72944
																		1157	6	15.077	Block3213	0.44	365.017	1	-3.34418		1157	6	15.077	Block3213	0.3	253.693	0.7	-2.29285
																		1158	6	15.152	Block3215	0.2	367.105	0.5	-2.31982		1158	6	15.152	Block3215	0.1	254.87	0.2	-1.37649
																		1159	6	15.22	Block3219	0.12	367.758	0.3	-1.76442		1159	6	15.22	Block3219	0.13	254.715	0.3	-1.5116
																		1160	6	15.25	Block3220	0.14	367.549	0.3	-1.90107		1160	6	15.25	Block3220	0.09	254.934	0.2	-1.24414
																		1161	6	15.29	Block3222	0.17	367.311	0.4	-2.11917		1161	6	15.29	Block3222	0.11	254.809	0.3	-1.41246
																		1162	6	15.328	Block3223	0.16	367.393	0.4	-2.01874		1162	6	15.328	Block3223	0.1	254.877	0.2	-1.30968
																		1163	6	15.434	Block3224	0.2	367.092	0.5	-2.18713		1163	6	15.434	Block3224	0.16	254.528	0.4	-1.62784
																		1164	6	15.524	Block3229	0.06	368.242	0.1	-1.464		1164	6	15.524	Block3229	0	255.443	0	-0.229064
																		1165	6	15.738	Block3234	0.34	365.843	0.8	-3.79826		1165	6	15.738	Block3234	0.01	255.402	0	-0.513353
																		1166	6	15.852	Block3238	0.05	368.35	0.1	-1.46362		1166	6	15.852	Block3238	0.08	254.977	0.2	1.56732
																		1167	6	15.891	Block3239	0.01	368.646	0	-0.762524		1167	6	15.891	Block3239	0.14	254.652	0.3	1.96158
																		1168	6	15.996	Block3240	0.1	367.882	0.2	-2.15407		1168	6	15.996	Block3240	0.04	255.244	0.1	1.05384
																		1169	6	16.119	Block3241	0.08	368.069	0.2	-1.89421		1169	6	16.119	Block3241	0.02	255.327	0.1	0.811855
																		1170	6	16.188	Block3242	0.03	368.47	0.1	-1.22313		1170	6	16.188	Block3242	0.06	255.109	0.1	1.32023
																		1171	6	16.363	Block3244	0.04	368.466	0.1	-1.30738		1171	6	16.363	Block3244	0	255.454	0	0.0961582
																		1172	6	16.807	Block3245	0.1	367.887	0.2	-2.20709		1172	6	16.807	Block3245	0.02	255.365	0	-0.707554
																		1173	6	16.849	Block3246	0.69	362.962	1.6	-4.80393		1173	6	16.849	Block3246	0.1	254.869	0.2	-1.52717
																		1174	6	16.929	Block3247	0.51	364.401	1.2	-4.19677		1174	6	16.929	Block3247	0.04	255.225	0.1	-0.96485
																		1175	6	17.147	Block3250	0.65	363.232	1.5	-4.316		1175	6	17.147	Block3250	0.32	253.584	0.7	-2.50993
																		1176	6	17.21	Block3260	0.61	363.558	1.4	-3.31673		1176	6	17.21	Block3260	0.6	251.937	1.4	-2.726
																		1177	6	17.311	Block3264	0.65	363.232	1.5	-4.316		1177	6	17.311	Block3264	0.32	253.584	0.7	-2.50993
																		1178	6	17.388	Block3265	0.62	363.516	1.4	-4.1155		1178	6	17.388	Block3265	0.29	253.74	0.7	-2.35258
																		1179	6	17.423	Block3266	0.76	362.31	1.8	-4.47156		1179	6	17.423	Block3266	0.4	253.088	0.9	-2.70762
																		1180	6	17.488	Block3269	0.65	363.232	1.5	-4.316		1180	6	17.488	Block3269	0.32	253.584	0.7	-2.50993
																		1181	6	17.598	Block3270	0.59	363.726	1.4	-4.21196		1181	6	17.598	Block3270	0.46	252.76	1.1	-3.07992
																		1182	6	17.71	Block3272	0.46	364.874	1.1	-4.07749		1182	6	17.71	Block3272	0.1	254.876	0.2	-1.57402
																		1183	6	18.5	Block3273	0.71	362.742	1.6	-5.27449		1183	6	18.5	Block3273	0.41	253.057	0.9	-3.32806
																		1184	6	18.731	Block3274	0.67	363.116	1.5	-4.74001		1184	6	18.731	Block3274	0.16	254.522	0.4	-1.92669
																		1185	6	18.9	Block3277	0.73	362.609	1.7	-4.81902		1185	6	18.9	Block3277	0.08	254.98	0.2	-1.33966
																		1186	6	19.002	Block3278	0.67	363.116	1.5	-4.74001		1186	6	19.002	Block3278	0.16	254.522	0.4	-1.92669
																		1187	6	19.033	Block3279	0.73	362.609	1.7	-4.81902		1187	6	19.033	Block3279	0.08	254.98	0.2	-1.33966
																		1188	6	19.144	Block3280	0.67	363.116	1.5	-4.74001		1188	6	19.144	Block3280	0.16	254.522	0.4	-1.92669
																		1189	6	20.144		0.72	362.664	1.7	-4.81018		1189	6	20.144		0.09	254.917	0.2	-1.43022
																		1190	6	20.307	Block3281	0.73	362.609	1.7	-4.81902		1190	6	20.307	Block3281	0.08	254.98	0.2	-1.33966
																		1191	6	20.343	Block3282	0.67	363.116	1.5	-4.74001		1191	6	20.343	Block3282	0.16	254.522	0.4	-1.92669
																		1192	6	20.783	Block3283	0.73	362.609	1.7	-4.81902		1192	6	20.783	Block3283	0.08	254.98	0.2	-1.33966
																		1193	6	20.85	Block3284	0.67	363.116	1.5	-4.74001		1193	6	20.85	Block3284	0.16	254.522	0.4	-1.92669
																		1194	6	21.136	Block3285	0.59	363.778	1.4	-4.33772		1194	6	21.136	Block3285	0.18	254.406	0.4	-1.9896
																		1195	6	21.219	Block3286	0.67	363.116	1.5	-4.74001		1195	6	21.219	Block3286	0.16	254.522	0.4	-1.92669
																		1196	6	21.411	Block3287	0.73	362.609	1.7	-4.81902		1196	6	21.411	Block3287	0.08	254.98	0.2	-1.33966
																		1197	6	21.523	Block3288	0.67	363.116	1.5	-4.74001		1197	6	21.523	Block3288	0.16	254.522	0.4	-1.92669
																		1198	6	22.122	Block3289	0.73	362.609	1.7	-4.81902		1198	6	22.122	Block3289	0.08	254.98	0.2	-1.33966
																		1199	6	22.189	Block3290	0.67	363.116	1.5	-4.74001		1199	6	22.189	Block3290	0.16	254.522	0.4	-1.92669
																		1200	6	23.189		0.63	363.386	1.5	-4.55499		1200	6	23.189		0.17	254.456	0.4	-1.96053
																		1201	6	24.177	Block3291	0.59	363.778	1.4	-4.33772		1201	6	24.177	Block3291	0.18	254.406	0.4	-1.9896
																		1202	6	24.302	Block3292	0.67	363.116	1.5	-4.74001		1202	6	24.302	Block3292	0.16	254.522	0.4	-1.92669
																		1203	6	25.154	Block3298	0.29	366.303	0.7	-2.97328		1203	6	25.154	Block3298	0.27	253.852	0.6	-2.39822
																		1204	6	25.463	Block3310	0.67	363.116	1.5	-4.74001		1204	6	25.463	Block3310	0.16	254.522	0.4	-1.92669
																		1205	6	26.463		0.69	362.833	1.6	-4.78015		1205	6	26.463		0.13	254.669	0.3	-1.74385
																		1206	6	27.463		0.71	362.663	1.7	-4.80707		1206	6	27.463		0.1	254.839	0.2	-1.53133
																		1207	6	28.296	Block3311	0.73	362.609	1.7	-4.81902		1207	6	28.296	Block3311	0.08	254.98	0.2	-1.33966
																		1208	6	28.333	Block3312	0.65	363.289	1.5	-4.43333		1208	6	28.333	Block3312	0.1	254.887	0.2	-1.42846
																		1209	6	28.437	Block3314	0.67	363.116	1.5	-4.74001		1209	6	28.437	Block3314	0.16	254.522	0.4	-1.92669
																		1210	6	28.744	Block3315	0.73	362.609	1.7	-4.81902		1210	6	28.744	Block3315	0.08	254.98	0.2	-1.33966
																		1211	6	28.915	Block3316	0.67	363.116	1.5	-4.74001		1211	6	28.915	Block3316	0.16	254.522	0.4	-1.92669
																		1212	6	29.915		0.64	362.745	1.6	-4.71749		1212	6	29.915		0.22	253.936	0.6	-2.36088
																		1213	6	30.915		0.61	362.586	1.7	-4.63869		1213	6	30.915		0.3	253.228	0.9	-2.76835
																		1214	6	31.915		0.58	362.639	1.7	-4.50714		1214	6	31.915		0.38	252.487	1.2	-3.11457
																		1215	6	32.915		0.54	362.873	1.6	-4.33384		1215	6	32.915		0.46	251.806	1.4	-3.38454
																		1216	6	33.915		0.51	363.263	1.5	-4.12335		1216	6	33.915		0.55	251.232	1.7	-3.58488
																		1217	6	34.915		0.47	363.767	1.4	-3.88466		1217	6	34.915		0.62	250.789	1.8	-3.72681
																		1218	6	35.915		0.43	364.329	1.2	-3.63057		1218	6	35.915		0.7	250.47	2	-3.82525
																		1219	6	36.915		0.39	364.919	1	-3.3654		1219	6	36.915		0.77	250.276	2	-3.8875
																		1220	6	37.915		0.35	365.495	0.9	-3.1005		1220	6	37.915		0.83	250.197	2.1	-3.92047
																		1221	6	38.915		0.32	366.038	0.7	-2.839		1221	6	38.915		0.89	250.224	2	-3.92968
																		1222	6	38.978	Block3320	0.32	366.071	0.7	-2.8228		1222	6	38.978	Block3320	0.89	250.229	2	-3.92954
																		1223	6	39.358	Block3321	0.4	365.346	0.9	-2.97725		1223	6	39.358	Block3321	1.21	248.377	2.8	-4.28213
																		1224	6	40.358		0.36	365.712	0.8	-2.80987		1224	6	40.358		1.11	248.878	2.6	-4.12362
																		1225	6	41.358		0.31	366.138	0.7	-2.60903		1225	6	41.358		1	249.576	2.3	-3.90164
																		1226	6	41.543	Block3322	0.3	366.221	0.7	-2.56852		1226	6	41.543	Block3322	0.98	249.726	2.2	-3.85258
																		1227	6	42.096	Block3324	0.44	365.021	1	-3.06496		1227	6	42.096	Block3324	1.21	248.413	2.8	-4.20225
																		1228	6	43.096		0.47	364.707	1.1	-3.13484		1228	6	43.096		1.4	247.114	3.3	-4.49116
																		1229	6	44.096		0.5	364.517	1.2	-3.1688		1229	6	44.096		1.58	246.196	3.6	-4.67607
																		1230	6	44.587	Block3326	0.51	364.469	1.2	-3.17363		1230	6	44.587	Block3326	1.65	245.863	3.8	-4.74086
																		1231	6	45.358	Block3329	0.06	368.275	0.1	-1.24925		1231	6	45.358	Block3329	0.9	250.183	2.1	-4.08611
																		1232	6	45.425	Block3330	0.06	368.256	0.1	-1.26702		1232	6	45.425	Block3330	1.03	249.425	2.4	-4.34789
																		1233	6	45.663	Block3331	0.06	368.252	0.1	-1.24577		1233	6	45.663	Block3331	1.14	248.829	2.6	-4.46585
																		1234	6	45.742	Block3335	0.03	368.478	0.1	-0.93047		1234	6	45.742	Block3335	0.87	250.338	2	-3.90648
																		1235	6	45.856	Block3338	0.02	368.559	0.1	-0.774757		1235	6	45.856	Block3338	0.9	250.202	2.1	-3.88255
																		1236	6	46.2	Block3340	0.02	368.571	0.1	-0.74852		1236	6	46.2	Block3340	0.67	251.529	1.5	-3.34234
																		1237	6	46.371	Block3342	0.04	368.392	0.1	-1.05932		1237	6	46.371	Block3342	0.8	250.783	1.8	-3.73268
																		1238	6	46.668	Block3344	0.02	368.571	0.1	-0.74852		1238	6	46.668	Block3344	0.67	251.529	1.5	-3.34234
																		1239	6	46.749	Block3346	0.03	368.515	0.1	-0.855395		1239	6	46.749	Block3346	0.53	252.353	1.2	-2.99712
																		1240	6	46.872	Block3350	0.24	366.759	0.5	-2.29778		1240	6	46.872	Block3350	0.81	250.739	1.8	-3.52106
																		1241	6	47.317	Block3351	0.2	367.024	0.5	-2.10541		1241	6	47.317	Block3351	0.73	251.152	1.7	-3.30801
																		1242	6	47.346	Block3352	0.24	366.759	0.5	-2.29778		1242	6	47.346	Block3352	0.81	250.739	1.8	-3.52106
																		1243	6	47.368	Block3354	0.26	366.525	0.6	-2.43732		1243	6	47.368	Block3354	0.86	250.426	2	-3.64975
																		1244	6	48.113	Block3356	0.01	368.671	0	-0.460627		1244	6	48.113	Block3356	0.58	252.04	1.3	-2.74199
																		1245	6	48.238	Block3357	0.29	366.281	0.7	2.14653		1245	6	48.238	Block3357	0.03	255.284	0.1	-0.56497
																		1246	6	48.513	Block3358	0.21	366.952	0.5	1.88305		1246	6	48.513	Block3358	0.03	255.293	0.1	-0.564172
																		1247	6	49.442	Block3365	1.01	360.221	2.3	4.33741		1247	6	49.442	Block3365	0.04	255.213	0.1	0.731003
																		1248	6	49.538	Block3366	1.58	355.518	3.6	5.1583		1248	6	49.538	Block3366	0.21	254.203	0.5	1.58637
																		1249	6	49.699	Block3369	0.81	361.886	1.9	4.36263		1249	6	49.699	Block3369	0.05	255.187	0.1	0.86257
																		1250	6	49.774	Block3371	0.47	364.755	1.1	3.22393		1250	6	49.774	Block3371	0.06	255.119	0.1	0.93368
																		1251	6	49.805	Block3372	0.68	363.04	1.6	3.81245		1251	6	49.805	Block3372	0.09	254.897	0.2	1.19079
																		1252	6	49.852	Block3375	0.38	365.568	0.9	2.78239		1252	6	49.852	Block3375	0	255.454	0	-0.0693267
																		1253	6	49.881	Block3376	0.32	366.08	0.7	2.54369		1253	6	49.881	Block3376	0	255.447	0	-0.14817
																		1254	6	50.055	Block3377	0.32	366.061	0.7	2.54603		1254	6	50.055	Block3377	0	255.451	0	-0.108285
																		1255	6	50.191	Block3379	0.44	365.055	1	2.96749		1255	6	50.191	Block3379	0	255.429	0	0.253911
																		1256	6	50.266	Block3386	0.14	367.534	0.3	1.41325		1256	6	50.266	Block3386	0.07	255.029	0.2	-0.831603
																		1257	6	50.328	Block3388	0.14	367.534	0.3	1.41325		1257	6	50.328	Block3388	0.07	255.029	0.2	-0.831603
																		1258	6	50.351	Block3391	0.46	364.901	1	3.13534		1258	6	50.351	Block3391	0.07	255.042	0.2	1.02563
																		1259	6	50.429	Block3394	0.23	366.779	0.5	2.2698		1259	6	50.429	Block3394	0	255.45	0	0.126642
																		1260	6	50.458	Block3395	0.27	366.442	0.6	2.48178		1260	6	50.458	Block3395	0.02	255.335	0	0.566627
																		1261	6	50.499	Block3396	0.46	364.901	1	3.13534		1261	6	50.499	Block3396	0.07	255.042	0.2	1.02563
																		1262	6	50.534	Block3397	0.33	365.928	0.8	2.74264		1262	6	50.534	Block3397	0.02	255.36	0	0.502742
																		1263	6	50.592	Block3401	0.16	367.375	0.4	1.50107		1263	6	50.592	Block3401	0.07	255.02	0.2	-0.839735
																		1264	6	50.696	Block3408	0.54	364.179	1.2	3.62856		1264	6	50.696	Block3408	0.06	255.104	0.1	1.00522
																		1265	6	50.842	Block3409	0.75	362.384	1.7	4.18457		1265	6	50.842	Block3409	0.09	254.931	0.2	1.19943
																		1266	6	50.933	Block3411	0.51	364.427	1.2	3.70745		1266	6	50.933	Block3411	0.11	254.78	0.3	1.46253
																		1267	6	51.132	Block3412	0.58	363.865	1.3	3.96076		1267	6	51.132	Block3412	0.16	254.5	0.4	1.7488
																		1268	7	0.007	Block3413	0.45	364.911	1	3.70326		1268	7	0.007	Block3413	0.39	253.184	0.9	2.84258
																		1269	7	0.148	Block3414	0.45	364.911	1	3.70326		1269	7	0.148	Block3414	0.39	253.184	0.9	2.84258
																		1270	7	0.44	Block3415	0.54	364.206	1.2	4.04946		1270	7	0.44	Block3415	0.53	252.362	1.2	3.33507
																		1271	7	0.609	Block3416	0.28	366.354	0.7	3.03582		1271	7	0.609	Block3416	0.36	253.358	0.8	2.83026
																		1272	7	0.666	Block3422	0.51	364.462	1.2	4.49845		1272	7	0.666	Block3422	0.96	249.842	2.2	5.13655
																		1273	7	0.737	Block3424	0.32	366.021	0.7	3.29987		1273	7	0.737	Block3424	0.45	252.836	1	3.22289
																		1274	7	0.811	Block3426	0.12	367.752	0.3	2.03436		1274	7	0.811	Block3426	0.28	253.78	0.7	2.613
																		1275	7	0.905	Block3430	0.47	364.754	1.1	3.91455		1275	7	0.905	Block3430	0.57	252.123	1.3	3.56702
																		1276	7	0.964	Block3432	0.16	367.385	0.4	2.6637		1276	7	0.964	Block3432	0.31	253.636	0.7	3.05621
																		1277	7	1.158	Block3438	0.09	368.001	0.2	2.3053		1277	7	1.158	Block3438	0.49	252.565	1.1	4.47622
																		1278	7	1.351	Block3441	0.31	366.126	0.7	3.49236		1278	7	1.351	Block3441	0.52	252.421	1.2	3.74296
																		1279	7	2.351		0.68	362.816	1.6	5.99804		1279	7	2.351		0.57	251.974	1.4	4.55711
																		1280	7	2.511	Block3445	0.74	362.532	1.7	6.27182		1280	7	2.511	Block3445	0.57	252.117	1.3	4.58923
																		1281	7	2.59	Block3446	0.47	364.756	1.1	4.76322		1281	7	2.59	Block3446	0.34	253.431	0.8	3.3844
																		1282	7	3.25	Block3448	0.58	363.881	1.3	5.14179		1282	7	3.25	Block3448	0.43	252.918	1	3.70507
																		1283	7	3.326	Block3452	1.2	358.701	2.7	7.18687		1283	7	3.326	Block3452	1.07	249.186	2.5	5.67212
																		1284	7	3.9	Block3455	1.05	359.943	2.4	7.36535		1284	7	3.9	Block3455	1.09	249.07	2.5	6.26568
																		1285	7	3.936	Block3457	0.54	364.168	1.2	5.48963		1285	7	3.936	Block3457	0.55	252.253	1.3	4.58094
																		1286	7	4.024	Block3458	0.56	364.029	1.3	5.81733		1286	7	4.024	Block3458	0.67	251.534	1.5	5.29171
																		1287	7	4.395	Block3459	0.39	365.485	0.9	4.84135		1287	7	4.395	Block3459	0.69	251.438	1.6	5.35629
																		1288	7	4.451	Block3460	0.41	365.276	0.9	4.69326		1288	7	4.451	Block3460	0.78	250.864	1.8	5.38168
																		1289	7	4.56	Block3462	0.8	362.018	1.8	6.44171		1289	7	4.56	Block3462	0.98	249.749	2.2	5.92279
																		1290	7	4.618	Block3463	0.67	363.055	1.5	5.68405		1290	7	4.618	Block3463	0.85	250.457	2	5.317
																		1291	7	4.876	Block3465	0.93	360.944	2.1	6.33601		1291	7	4.876	Block3465	0.79	250.818	1.8	4.87797
																		1292	7	5.073	Block3467	1.96	352.397	4.4	8.69355		1292	7	5.073	Block3467	1.51	246.675	3.4	6.36675
																		1293	7	5.107	Block3468	2.2	350.47	5	9.50064		1293	7	5.107	Block3468	1.67	245.753	3.8	6.91816
																		1294	7	5.183	Block3469	1.67	354.78	3.8	7.96658		1294	7	5.183	Block3469	1.02	249.5	2.3	5.1983
																		1295	7	5.416	Block3473	1.97	352.346	4.5	9.23203		1295	7	5.416	Block3473	1.34	247.654	3.1	6.36358
																		1296	7	5.867	Block3474	1.54	355.882	3.5	8.49092		1296	7	5.867	Block3474	1.08	249.122	2.5	5.95309
																		1297	7	5.996	Block3475	1.09	359.594	2.5	7.55446		1297	7	5.996	Block3475	1	249.615	2.3	6.02799
																		1298	7	6.162	Block3476	1.11	359.445	2.5	7.30324		1298	7	6.162	Block3476	1.01	249.538	2.3	5.81841
																		1299	7	6.242	Block3482	0.59	363.733	1.4	5.52817		1299	7	6.242	Block3482	0.55	252.251	1.3	4.4103
																		1300	7	6.296	Block3489	0.52	364.347	1.2	4.56758		1300	7	6.296	Block3489	0.19	254.307	0.4	2.32873
																		1301	7	6.464	Block3491	0.65	363.288	1.5	4.78996		1301	7	6.464	Block3491	0.2	254.292	0.5	2.20731
																		1302	7	6.512	Block3492	0.56	363.996	1.3	4.43908		1302	7	6.512	Block3492	0.14	254.656	0.3	1.81693
																		1303	7	6.56	Block3497	0.52	364.385	1.2	4.66581		1303	7	6.56	Block3497	0.21	254.225	0.5	2.4725
																		1304	7	6.602	Block3502	0.8	361.966	1.8	6.46642		1304	7	6.602	Block3502	0.74	251.099	1.7	5.17523
																		1305	7	6.673	Block3503	0.68	363.01	1.6	5.70678		1305	7	6.673	Block3503	0.65	251.667	1.5	4.62922
																		1306	7	6.862	Block3504	0.88	361.334	2	5.91076		1306	7	6.862	Block3504	0.71	251.275	1.6	4.43276
																		1307	7	6.951	Block3505	0.75	362.421	1.7	5.41323		1307	7	6.951	Block3505	0.52	252.391	1.2	3.76152
																		1308	7	7.002	Block3506	0.61	363.636	1.4	4.71897		1308	7	7.002	Block3506	0.35	253.411	0.8	2.97854
																		1309	7	7.044	Block3508	0.85	361.564	2	5.5912		1309	7	7.044	Block3508	0.77	250.932	1.8	4.43081
																		1310	7	7.086	Block3509	0.73	362.584	1.7	5.13866		1310	7	7.086	Block3509	0.58	252.053	1.3	3.81189
																		1311	7	7.136	Block3512	0.8	362.035	1.8	5.3203		1311	7	7.136	Block3512	0.63	251.736	1.5	3.9546
																		1312	7	7.213	Block3519	0.95	360.75	2.2	5.76179		1312	7	7.213	Block3519	0.77	250.934	1.8	4.32684
																		1313	7	7.245	Block3520	0.94	360.795	2.2	5.7035		1313	7	7.245	Block3520	0.78	250.86	1.8	4.33021
																		1314	7	7.303	Block3524	0.85	361.564	2	5.5912		1314	7	7.303	Block3524	0.77	250.932	1.8	4.43081
																		1315	7	7.333	Block3525	0.73	362.584	1.7	5.13866		1315	7	7.333	Block3525	0.58	252.053	1.3	3.81189
																		1316	7	7.371	Block3526	0.6	363.723	1.4	4.51075		1316	7	7.371	Block3526	0.4	253.1	0.9	3.08285
																		1317	7	7.468	Block3530	0.85	361.564	2	5.5912		1317	7	7.468	Block3530	0.77	250.932	1.8	4.43081
																		1318	7	7.6	Block3531	0.73	362.584	1.7	5.13866		1318	7	7.6	Block3531	0.58	252.053	1.3	3.81189
																		1319	7	7.728	Block3554	0.1	367.919	0.2	1.35955		1319	7	7.728	Block3554	0.02	255.317	0.1	-0.550704
																		1320	7	7.821	Block3569	0.27	366.433	0.6	2.74417		1320	7	7.821	Block3569	0.01	255.368	0	0.533567
																		1321	7	7.991	Block3578	0.27	366.433	0.6	2.74417		1321	7	7.991	Block3578	0.01	255.368	0	0.533567
																		1322	7	8.015	Block3579	0.27	366.433	0.6	2.74417		1322	7	8.015	Block3579	0.01	255.368	0	0.533567
																		1323	7	8.098	Block3594	0.32	366.066	0.7	2.9516		1323	7	8.098	Block3594	0.01	255.403	0	0.412028
																		1324	7	8.128	Block3595	0.32	366.079	0.7	2.95851		1324	7	8.128	Block3595	0.01	255.415	0	0.362699
																		1325	7	8.367	Block3670	0.32	366.066	0.7	2.9516		1325	7	8.367	Block3670	0.01	255.403	0	0.412028
																		1326	7	8.389	Block3671	0.32	366.079	0.7	2.95851		1326	7	8.389	Block3671	0.01	255.415	0	0.362699
																		1327	7	8.421	Block3676	0.6	363.648	1.4	4.42398		1327	7	8.421	Block3676	0.26	253.917	0.6	2.42506
																		1328	7	8.472	Block3686	0.28	366.369	0.7	2.85558		1328	7	8.472	Block3686	0	255.448	0	0.160917
																		1329	7	8.928	Block3689	0.21	367.015	0.5	2.52444		1329	7	8.928	Block3689	0.04	255.237	0.1	-0.892032
																		1330	7	9.425	Block3692	0.46	364.845	1.1	4.16003		1330	7	9.425	Block3692	0.06	255.116	0.1	1.22473
																		1331	7	9.623	Block3696	0.13	367.677	0.3	2.04212		1331	7	9.623	Block3696	0.2	254.266	0.5	2.13309
																		1332	7	9.682	Block3707	0.03	368.493	0.1	0.94215		1332	7	9.682	Block3707	0	255.447	0	0.165708
																		1333	7	9.773	Block3725	0	368.764	0	0.089947		1333	7	9.773	Block3725	0.08	254.998	0.2	-0.970792
																		1334	7	9.84	Block3726	0.01	368.701	0	0.376963		1334	7	9.84	Block3726	0.03	255.262	0.1	-0.6413
																		1335	7	10.071	Block3730	0.02	368.564	0.1	0.665136		1335	7	10.071	Block3730	0	255.433	0	-0.221716
																		1336	7	10.106	Block3731	0.01	368.664	0	0.468236		1336	7	10.106	Block3731	0.02	255.344	0	-0.487064
																		1337	7	10.161	Block3736	0.15	367.507	0.3	2.18066		1337	7	10.161	Block3736	0.25	253.961	0.6	2.3743
																		1338	7	10.248	Block3743	0.08	368.045	0.2	1.48981		1338	7	10.248	Block3743	0.01	255.386	0	0.46324
																		1339	7	10.287	Block3744	0.03	368.47	0.1	0.937312		1339	7	10.287	Block3744	0	255.456	0	0.0175295
																		1340	7	10.335	Block3747	0.02	368.579	0.1	0.622725		1340	7	10.335	Block3747	0.03	255.287	0.1	-0.58909
																		1341	7	10.394	Block3751	0.03	368.551	0.1	-0.774525		1341	7	10.394	Block3751	0.06	255.083	0.1	-1.01624
																		1342	7	10.493	Block3754	1.12	359.314	2.6	-5.24954		1342	7	10.493	Block3754	0.71	251.272	1.6	-3.49228
																		1343	7	10.81	Block3758	0.68	362.994	1.6	-4.45251		1343	7	10.81	Block3758	0.34	253.436	0.8	-2.63337
																		1344	7	11.81		0.7	362.721	1.6	-4.49619		1344	7	11.81		0.38	253.164	0.9	-2.76635
																		1345	7	12.81		0.72	362.552	1.7	-4.52634		1345	7	12.81		0.42	252.954	1	-2.87064
																		1346	7	13.694	Block3759	0.74	362.492	1.7	-4.54146		1346	7	13.694	Block3759	0.45	252.821	1	-2.94252
																		1347	7	14.128	Block3764	0.85	361.601	1.9	-5.37642		1347	7	14.128	Block3764	0.22	254.13	0.5	-2.31273
																		1348	7	14.612	Block3766	0.57	363.909	1.3	-4.17463		1348	7	14.612	Block3766	0.2	254.297	0.5	-2.03896
																		1349	7	14.847	Block3771	0.85	361.601	1.9	-5.37642		1349	7	14.847	Block3771	0.22	254.13	0.5	-2.31273
																		1350	7	14.923	Block3775	0.76	362.31	1.8	-5.25123		1350	7	14.923	Block3775	0.12	254.768	0.3	-1.7135
																		1351	7	14.998	Block3776	0.86	361.5	2	-5.52753		1351	7	14.998	Block3776	0.2	254.276	0.5	-2.22666
																		1352	7	15.065	Block3777	0.76	362.31	1.8	-5.25123		1352	7	15.065	Block3777	0.12	254.768	0.3	-1.7135
																		1353	7	15.191	Block3781	0.28	366.35	0.7	-2.81223		1353	7	15.191	Block3781	0.05	255.134	0.1	-1.02538
																		1354	7	15.262	Block3783	0.76	362.31	1.8	-5.25123		1354	7	15.262	Block3783	0.12	254.768	0.3	-1.7135
																		1355	7	15.309	Block3784	0.8	361.985	1.8	-5.23048		1355	7	15.309	Block3784	0.16	254.503	0.4	-1.96005
																		1356	7	15.377	Block3786	0.32	366.075	0.7	-2.90514		1356	7	15.377	Block3786	0.08	254.959	0.2	-1.24807
																		1357	7	15.412	Block3788	0.33	365.977	0.8	-3.08942		1357	7	15.412	Block3788	0.05	255.158	0.1	-1.00944
																		1358	7	15.467	Block3794	0.49	364.573	1.1	-3.09002		1358	7	15.467	Block3794	0.33	253.518	0.8	-2.09993
																		1359	7	15.525	Block3795	0.58	363.838	1.3	-3.34034		1359	7	15.525	Block3795	0.41	253.05	0.9	-2.33323
																		1360	7	15.582	Block3804	0.76	362.374	1.7	-5.3111		1360	7	15.582	Block3804	0.06	255.089	0.1	-1.27164
																		1361	7	15.692	Block3813	0.49	364.573	1.1	-3.09002		1361	7	15.692	Block3813	0.33	253.518	0.8	-2.09993
																		1362	7	15.774	Block3819	0.87	361.44	2	-5.4775		1362	7	15.774	Block3819	0.15	254.599	0.3	-1.87343
																		1363	7	15.869	Block3833	0.75	362.398	1.7	-4.72657		1363	7	15.869	Block3833	0.28	253.786	0.7	-2.42024
																		1364	7	16.019	Block3835	0.89	361.252	2	-5.19782		1364	7	16.019	Block3835	0.39	253.184	0.9	-2.85749
																		1365	7	16.109	Block3836	0.92	360.999	2.1	-5.44643		1365	7	16.109	Block3836	0.23	254.075	0.5	-2.29631
																		1366	7	16.18	Block3849	1.12	359.37	2.5	-6.33485		1366	7	16.18	Block3849	0.15	254.578	0.3	-1.93666
																		1367	7	16.205	Block3851	0.91	361.099	2.1	-5.81658		1367	7	16.205	Block3851	0.05	255.148	0.1	-1.16522
																		1368	7	16.265	Block3860	0.8	361.999	1.8	-5.25523		1368	7	16.265	Block3860	0.08	255.003	0.2	-1.35931
																		1369	7	16.369	Block3862	0.88	361.34	2	-5.35866		1369	7	16.369	Block3862	0.13	254.714	0.3	-1.69292
																		1370	7	16.583	Block3867	1.21	358.613	2.8	-6.4		1370	7	16.583	Block3867	0.19	254.316	0.4	-2.1445
																		1371	7	16.965	Block3869	1.25	358.251	2.9	-6.34046		1371	7	16.965	Block3869	0.23	254.127	0.5	-2.25413
																		1372	7	17	Block3870	1.21	358.613	2.8	-6.4		1372	7	17	Block3870	0.19	254.316	0.4	-2.1445
																		1373	7	17.182	Block3873	0.44	365.033	1	-3.35253		1373	7	17.182	Block3873	1.32	247.776	3	-4.80765
																		1374	7	17.241	Block3877	0.37	365.651	0.8	-3.49259		1374	7	17.241	Block3877	1.15	248.733	2.6	-5.12924
																		1375	7	17.287	Block3885	0.18	367.244	0.4	-2.95995		1375	7	17.287	Block3885	0.9	250.199	2.1	-5.4982
																		1376	7	17.428	Block3887	0.1	367.933	0.2	-2.38992		1376	7	17.428	Block3887	0.69	251.438	1.6	-5.24154
																		1377	7	17.651	Block3888	0.13	367.684	0.3	-2.6018		1377	7	17.651	Block3888	0.77	250.929	1.8	-5.31732
																		1378	7	17.795	Block3899	0.1	367.876	0.2	-2.66412		1378	7	17.795	Block3899	0.5	252.501	1.2	-4.84809
																		1379	7	17.829	Block3900	0.17	367.283	0.4	-3.65277		1379	7	17.829	Block3900	0.59	252.017	1.3	-5.5586
																		1380	7	17.9	Block3904	0.02	368.629	0	-1.28879		1380	7	17.9	Block3904	0.14	254.645	0.3	-3.11784
																		1381	7	17.981	Block3909	0	368.737	0	-0.397641		1381	7	17.981	Block3909	0.4	253.087	0.9	-3.48686
																		1382	7	18.038	Block3911	0.03	368.509	0.1	-1.07948		1382	7	18.038	Block3911	0.49	252.576	1.1	-3.60182
																		1383	7	18.868	Block3914	0.05	368.369	0.1	-1.37255		1383	7	18.868	Block3914	0.54	252.259	1.3	-3.88409
																		1384	7	19.129	Block3916	0.01	368.712	0	-0.40258		1384	7	19.129	Block3916	0.43	252.915	1	-2.71583
																		1385	7	19.175	Block3919	0.01	368.672	0	-0.504815		1385	7	19.175	Block3919	0.44	252.86	1	-2.62227
																		1386	7	19.551	Block3920	0	368.729	0	-0.325253		1386	7	19.551	Block3920	0.4	253.073	0.9	-2.55646
																		1387	7	20.163	Block3921	0	368.767	0	0.0384292		1387	7	20.163	Block3921	0.26	253.908	0.6	-2.10767
																		1388	7	20.287	Block3922	0	368.747	0	0.247251		1388	7	20.287	Block3922	0.22	254.131	0.5	-1.95848
																		1389	7	20.733	Block3923	0	368.767	0	0.0384292		1389	7	20.733	Block3923	0.26	253.908	0.6	-2.10767
																		1390	7	21.733		0	368.767	0	0.0385192		1390	7	21.733		0.26	253.888	0.6	-2.11148
																		1391	7	22.733		0	368.767	0	0.0385358		1391	7	22.733		0.26	253.884	0.6	-2.11226
																		1392	7	23.733		0	368.767	0	0.0384862		1392	7	23.733		0.26	253.896	0.6	-2.11001
																		1393	7	24.247	Block3925	0	368.767	0	0.0384292		1393	7	24.247	Block3925	0.26	253.908	0.6	-2.10767
																		1394	7	25.247		0	368.767	0	0.0607281		1394	7	25.247		0.27	253.521	0.8	-2.47505
																		1395	7	26.247		0	368.765	0	0.0991184		1395	7	26.247		0.26	253.083	0.9	-2.90915
																		1396	7	27.247		0	368.761	0	0.16664		1396	7	27.247		0.25	252.724	1.1	-3.35858
																		1397	7	28.247		0	368.751	0	0.289294		1397	7	28.247		0.21	252.72	1.1	-3.69018
																		1398	7	29.247		0	368.74	0	0.434389		1398	7	29.247		0.14	253.512	0.8	-3.54446
																		1399	7	30.247		0	368.749	0	0.444524		1399	7	30.247		0.05	254.976	0.2	-2.19276
																		1400	7	30.848	Block3927	0	368.759	0	0.382506		1400	7	30.848	Block3927	0.01	255.395	0	-0.975217
																		1401	7	31.848		0	368.768	0	0.0432651		1401	7	31.848		0.02	255.356	0	-1.17
																		1402	7	32.848		0	368.763	0	-0.257553		1402	7	32.848		0.02	255.316	0.1	-1.33881
																		1403	7	33.848		0	368.746	0	-0.523723		1403	7	33.848		0.03	255.281	0.1	-1.48603
																		1404	7	34.175	Block3928	0	368.739	0	-0.602949		1404	7	34.175	Block3928	0.03	255.271	0.1	-1.52987
																		1405	7	34.602	Block3929	0	368.759	0	0.382506		1405	7	34.602	Block3929	0.01	255.395	0	-0.975217
																		1406	7	34.708	Block3930	0	368.739	0	-0.602949		1406	7	34.708	Block3930	0.03	255.271	0.1	-1.52987
																		1407	7	34.812	Block3931	0	368.759	0	0.382506		1407	7	34.812	Block3931	0.01	255.395	0	-0.975217
																		1408	7	34.852	Block3932	0.02	368.611	0	1.62534		1408	7	34.852	Block3932	0	255.456	0	-0.0752551
																		1409	7	35.204	Block3942	0.08	368.055	0.2	-1.87901		1409	7	35.204	Block3942	0.39	253.149	0.9	-3.38045
																		1410	7	35.438	Block3943	0.14	367.563	0.3	-2.34666		1410	7	35.438	Block3943	0.56	252.139	1.3	-3.89389
																		1411	7	35.63	Block3950	0.16	367.443	0.4	-2.8534		1411	7	35.63	Block3950	0.3	253.703	0.7	-3.28274
																		1412	7	35.719	Block3958	0.08	368.055	0.2	-1.87901		1412	7	35.719	Block3958	0.39	253.149	0.9	-3.38045
																		1413	7	35.784	Block3960	0.08	368.055	0.2	-1.87901		1413	7	35.784	Block3960	0.39	253.149	0.9	-3.38045
																		1414	7	35.873	Block3980	0.09	368.012	0.2	-2.28834		1414	7	35.873	Block3980	0.16	254.534	0.4	-2.52744
																		1415	7	36.01	Block3982	0.06	368.245	0.1	-1.83979		1415	7	36.01	Block3982	0.11	254.815	0.3	-2.03727
																		1416	7	36.043	Block3983	0.12	367.747	0.3	-2.53705		1416	7	36.043	Block3983	0.19	254.329	0.4	-2.66644
																		1417	7	36.079	Block3984	1.31	357.733	3	-6.6716		1417	7	36.079	Block3984	0.98	249.725	2.2	-4.80783
																		1418	7	36.116	Block3988	1.44	356.712	3.3	-6.74232		1418	7	36.116	Block3988	1.2	248.468	2.7	-5.1332
																		1419	7	36.18	Block3990	1.31	357.733	3	-6.6716		1419	7	36.18	Block3990	0.98	249.725	2.2	-4.80783
																		1420	7	36.257	Block3992	1.31	357.733	3	-6.6716		1420	7	36.257	Block3992	0.98	249.725	2.2	-4.80783
																		1421	7	36.285	Block3993	1.27	358.081	2.9	-6.75542		1421	7	36.285	Block3993	0.94	249.965	2.1	-4.84205
																		1422	7	36.496	Block3996	0.86	361.477	2	-5.57953		1422	7	36.496	Block3996	0.73	251.183	1.7	-4.27127
																		1423	7	36.608	Block4004	0.58	363.815	1.3	-3.93999		1423	7	36.608	Block4004	0.69	251.408	1.6	-3.56191
																		1424	7	36.657	Block4007	0.91	361.101	2.1	-5.56087		1424	7	36.657	Block4007	0.77	250.938	1.8	-4.26868
																		1425	7	36.703	Block4010	0.86	361.477	2	-5.57953		1425	7	36.703	Block4010	0.73	251.183	1.7	-4.27127
																		1426	7	36.733	Block4011	0.91	361.101	2.1	-5.56087		1426	7	36.733	Block4011	0.77	250.938	1.8	-4.26868
																		1427	7	36.767	Block4012	0.86	361.477	2	-5.57953		1427	7	36.767	Block4012	0.73	251.183	1.7	-4.27127
																		1428	7	36.808	Block4015	0.48	364.691	1.1	-3.99402		1428	7	36.808	Block4015	0.55	252.242	1.3	-3.54628
																		1429	7	36.919	Block4027	0.22	366.901	0.5	-2.31462		1429	7	36.919	Block4027	0.37	253.283	0.9	-2.49696
																		1430	7	36.961	Block4036	0.91	361.101	2.1	-5.56087		1430	7	36.961	Block4036	0.77	250.938	1.8	-4.26868
																		1431	7	37.004	Block4038	0.88	361.353	2	-5.80017		1431	7	37.004	Block4038	0.69	251.41	1.6	-4.28429
																		1432	7	37.057	Block4040	1.13	359.217	2.6	-4.87723		1432	7	37.057	Block4040	1.45	247.014	3.3	-4.58535
																		1433	7	37.102	Block4041	1.24	358.358	2.8	-5.01346		1433	7	37.102	Block4041	1.58	246.281	3.6	-4.70645
																		1434	7	37.18	Block4056	0.88	361.353	2	-5.80017		1434	7	37.18	Block4056	0.69	251.41	1.6	-4.28429
																		1435	7	37.272	Block4066	0.92	360.981	2.1	-5.76622		1435	7	37.272	Block4066	0.73	251.166	1.7	-4.27986
																		1436	7	37.297	Block4067	0.88	361.353	2	-5.80017		1436	7	37.297	Block4067	0.69	251.41	1.6	-4.28429
																		1437	7	37.414	Block4069	0.79	362.05	1.8	-5.56912		1437	7	37.414	Block4069	0.62	251.83	1.4	-4.0913
																		1438	7	37.482	Block4072	0.88	361.353	2	-5.80017		1438	7	37.482	Block4072	0.69	251.41	1.6	-4.28429
																		1439	7	37.519	Block4074	1.5	356.154	3.4	-8.26081		1439	7	37.519	Block4074	1.06	249.275	2.4	-5.78277
																		1440	7	37.594	Block4075	1.47	356.406	3.4	-8.09193		1440	7	37.594	Block4075	1.19	248.511	2.7	-6.06533
																		1441	7	37.623	Block4077	1.5	356.154	3.4	-8.26081		1441	7	37.623	Block4077	1.06	249.275	2.4	-5.78277
																		1442	7	37.74	Block4078	1.53	355.909	3.5	-8.0418		1442	7	37.74	Block4078	1.09	249.069	2.5	-5.66777
																		1443	7	37.848	Block4079	1.5	356.154	3.4	-8.26081		1443	7	37.848	Block4079	1.06	249.275	2.4	-5.78277
																		1444	7	37.906	Block4080	1.39	357.063	3.2	-8.04483		1444	7	37.906	Block4080	0.97	249.806	2.2	-5.58947
																		1445	7	37.941	Block4081	1.5	356.154	3.4	-8.26081		1445	7	37.941	Block4081	1.06	249.275	2.4	-5.78277
																		1446	7	38.141	Block4082	1.45	356.603	3.3	-7.82192		1446	7	38.141	Block4082	1.09	249.091	2.5	-5.65766
																		1447	7	38.276	Block4086	0.93	360.889	2.1	-6.1203		1447	7	38.276	Block4086	0.87	250.356	2	-4.92378
																		1448	7	38.404	Block4087	1.02	360.136	2.3	-6.34986		1448	7	38.404	Block4087	0.96	249.868	2.2	-5.10889
																		1449	7	38.453	Block4089	1.34	357.48	3.1	-7.61049		1449	7	38.453	Block4089	1	249.615	2.3	-5.47425
																		1450	7	38.515	Block4095	1.45	356.603	3.3	-7.82192		1450	7	38.515	Block4095	1.09	249.091	2.5	-5.65766
																		1451	7	38.806	Block4097	1.56	355.667	3.6	-7.96389		1451	7	38.806	Block4097	1.35	247.621	3.1	-6.15873
																		1452	7	38.851	Block4098	1.45	356.603	3.3	-7.82192		1452	7	38.851	Block4098	1.09	249.091	2.5	-5.65766
																		1453	7	38.957	Block4099	1.48	356.349	3.4	-8.28657		1453	7	38.957	Block4099	0.97	249.783	2.2	-5.60059
																		1454	7	39.643	Block4101	0.89	361.268	2	-4.42359		1454	7	39.643	Block4101	1.24	248.241	2.8	-4.33875
																		1455	7	39.711	Block4102	0.98	360.463	2.3	-4.57886		1455	7	39.711	Block4102	1.36	247.536	3.1	-4.47161
																		1456	7	40.68	Block4113	0.85	361.603	1.9	-4.86973		1456	7	40.68	Block4113	0.32	253.55	0.7	-2.51137
																		1457	7	41.106	Block4114	0.85	361.603	1.9	-4.86973		1457	7	41.106	Block4114	0.32	253.55	0.7	-2.51137
																		1458	7	41.663	Block4118	0.96	360.658	2.2	-5.45831		1458	7	41.663	Block4118	0.36	253.344	0.8	-2.78555
																		1459	7	41.802	Block4120	0.73	362.63	1.7	-4.93977		1459	7	41.802	Block4120	0.17	254.453	0.4	-1.99661
																		1460	7	42.049	Block4121	0.68	363.007	1.6	-4.92123		1460	7	42.049	Block4121	0.14	254.626	0.3	-1.86753
																		1461	7	42.456	Block4127	0.59	363.734	1.4	-4.60013		1461	7	42.456	Block4127	0.16	254.502	0.4	-2.00273
																		1462	7	42.724	Block4128	0.59	363.734	1.4	-4.60013		1462	7	42.724	Block4128	0.16	254.502	0.4	-2.00273
																		1463	7	42.803	Block4129	0.53	364.306	1.2	-4.36502		1463	7	42.803	Block4129	0.13	254.708	0.3	-1.78646
																		1464	7	42.832	Block4131	0.51	364.471	1.2	-4.18704		1464	7	42.832	Block4131	0.21	254.232	0.5	-2.23478
																		1465	7	42.865	Block4132	0.68	363.028	1.6	-5.01922		1465	7	42.865	Block4132	0.26	253.951	0.6	-2.56972
																		1466	7	42.947	Block4133	0.62	363.526	1.4	-4.75868		1466	7	42.947	Block4133	0.28	253.823	0.6	-2.65632
																		1467	7	43.481	Block4136	0	368.745	0	0.378327		1467	7	43.481	Block4136	0	255.443	0	-0.289123
																		1468	7	43.575	Block4137	0	368.74	0	0.438589		1468	7	43.575	Block4137	0.01	255.407	0	0.582587
																		1469	7	43.675	Block4138	0	368.745	0	0.406365		1469	7	43.675	Block4138	0.01	255.423	0	0.483556
																		1470	8	0.005	Block4139	0.28	366.353	0.7	3.95569		1470	8	0.005	Block4139	0.01	255.418	0	-0.493979
																		1471	8	0.413	Block4140	0.32	366.069	0.7	4.12587		1471	8	0.413	Block4140	0.01	255.399	0	-0.596559
																		1472	8	0.45	Block4141	0.37	365.614	0.9	4.4029		1472	8	0.45	Block4141	0	255.443	0	-0.286309
																		1473	8	0.503	Block4142	0.34	365.914	0.8	4.24315		1473	8	0.503	Block4142	0	255.451	0	-0.178146
																		1474	8	0.541	Block4143	0.28	366.353	0.7	3.95569		1474	8	0.541	Block4143	0.01	255.418	0	-0.493979
																		1475	8	0.952	Block4157	0.28	366.353	0.7	3.95569		1475	8	0.952	Block4157	0.01	255.418	0	-0.493979
																		1476	8	1.693	Block4158	0.37	365.616	0.9	4.27181		1476	8	1.693	Block4158	0	255.452	0	0.14348
																		1477	8	1.793	Block4159	0.3	366.238	0.7	3.78272		1477	8	1.793	Block4159	0	255.434	0	-0.352885
																		1478	8	1.836	Block4163	0.14	367.541	0.3	2.48443		1478	8	1.836	Block4163	0.05	255.15	0.1	-1.23993
																		1479	8	1.863	Block4166	0.1	367.895	0.2	1.38647		1479	8	1.863	Block4166	0.17	254.426	0.4	-1.50542
																		1480	8	1.954	Block4172	0.37	365.616	0.9	4.27181		1480	8	1.954	Block4172	0	255.452	0	0.14348
																		1481	8	2.386	Block4178	0.08	368.083	0.2	1.49713		1481	8	2.386	Block4178	0.11	254.809	0.3	-1.45434
																		1482	8	2.489	Block4184	0.37	365.616	0.9	4.27181		1482	8	2.489	Block4184	0	255.452	0	0.14348
																		1483	8	2.737	Block4189	0.24	366.731	0.6	3.13149		1483	8	2.737	Block4189	0.02	255.312	0.1	-0.832251
																		1484	8	3.183	Block4192	0.38	365.526	0.9	4.06184		1484	8	3.183	Block4192	0	255.452	0	0.134053
																		1485	8	3.287	Block4195	0.22	366.877	0.5	2.91863		1485	8	3.287	Block4195	0.03	255.267	0.1	-0.923584
																		1486	8	3.324	Block4196	0.23	366.781	0.5	2.9052		1486	8	3.324	Block4196	0.08	254.994	0.2	-1.40014
																		1487	8	3.398	Block4200	0.37	365.616	0.9	4.27181		1487	8	3.398	Block4200	0	255.452	0	0.14348
																		1488	8	3.757	Block4202	0.44	365.061	1	4.57849		1488	8	3.757	Block4202	0	255.449	0	0.192788
																		1489	8	3.831	Block4203	0.37	365.616	0.9	4.27181		1489	8	3.831	Block4203	0	255.452	0	0.14348
																		1490	8	4.626	Block4205	0.24	366.717	0.6	3.44556		1490	8	4.626	Block4205	0.03	255.27	0.1	-1.03772
																		1491	8	4.657	Block4208	0.28	366.352	0.7	3.36953		1491	8	4.657	Block4208	0.01	255.424	0	-0.389912
																		1492	8	4.757	Block4210	0.15	367.495	0.3	2.38273		1492	8	4.757	Block4210	0	255.453	0	0.110883
																		1493	8	4.849	Block4211	0.02	368.615	0	0.795117		1493	8	4.849	Block4211	0.03	255.277	0.1	-0.860393
																		1494	8	5.675	Block4213	0	368.741	0	-0.360528		1494	8	5.675	Block4213	0.09	254.902	0.2	-1.62224
																		1495	8	6.186	Block4215	0.01	368.71	0	0.538405		1495	8	6.186	Block4215	0.17	254.442	0.4	-2.25843
																		1496	8	7.167	Block4217	0	368.763	0	-0.205857		1496	8	7.167	Block4217	0.05	255.135	0.1	-1.73333
																		1497	8	7.25	Block4218	0.02	368.56	0.1	-1.53831		1497	8	7.25	Block4218	0.11	254.8	0.3	-2.73082
																		1498	8	7.681	Block4219	0.01	368.688	0	-1.11509		1498	8	7.681	Block4219	0.12	254.723	0.3	-3.38235
																		1499	8	8.015	Block4221	0.16	367.432	0.4	-5.20312		1499	8	8.015	Block4221	0.18	254.411	0.4	-4.6022
																		1500	8	9.015		0.16	367.4	0.4	-4.87542		1500	8	9.015		0.29	253.71	0.7	-5.49673
																		1501	8	9.23	Block4223	0.16	367.43	0.4	-4.77405		1501	8	9.23	Block4223	0.32	253.599	0.7	-5.62457
																		1502	8	9.502	Block4228	0.19	367.151	0.4	-4.55665		1502	8	9.502	Block4228	0.34	253.464	0.8	-5.05775
																		1503	8	9.566	Block4229	0.2	367.082	0.5	-5.12959		1503	8	9.566	Block4229	0.22	254.187	0.5	-4.4487
																		1504	8	9.724	Block4231	0.1	367.93	0.2	-3.08711		1504	8	9.724	Block4231	0.14	254.603	0.3	-3.11373
																		1505	8	9.86	Block4233	0.34	365.9	0.8	-6.68991		1505	8	9.86	Block4233	0.3	253.68	0.7	-5.26414
																		1506	8	9.961	Block4234	0.73	362.629	1.7	-10.6587		1506	8	9.961	Block4234	0.83	250.571	1.9	-9.50715
																		1507	8	10.007	Block4236	0.7	362.831	1.6	-12.2136		1507	8	10.007	Block4236	0.52	252.4	1.2	-8.76218
																		1508	8	10.229	Block4245	0.01	368.702	0	-0.282847		1508	8	10.229	Block4245	0.79	250.821	1.8	-2.37727
																		1509	8	10.26	Block4246	0.01	368.696	0	-0.293963		1509	8	10.26	Block4246	0.8	250.752	1.8	-2.38374
																		1510	8	10.288	Block4249	0	368.768	0	0.00149296		1510	8	10.288	Block4249	0.7	251.366	1.6	-2.26113
																		1511	8	10.349	Block4257	0	368.766	0	-0.0477698		1511	8	10.349	Block4257	0.72	251.23	1.7	-2.26122
																		1512	8	10.382	Block4259	0.01	368.716	0	-0.248398		1512	8	10.382	Block4259	0.83	250.6	1.9	-2.41112
																		1513	8	10.612	Block4262	0.01	368.684	0	-0.319531		1513	8	10.612	Block4262	0.86	250.414	2	-2.46975
																		1514	8	10.67	Block4268	0.01	368.696	0	-0.542467		1514	8	10.67	Block4268	0.82	250.653	1.9	-4.42706
																		1515	8	10.713	Block4269	0.02	368.567	0.1	-0.813852		1515	8	10.713	Block4269	0.91	250.16	2.1	-4.18328
																		1516	8	10.76	Block4284	0	368.753	0	-0.134507		1516	8	10.76	Block4284	0.72	251.222	1.7	-2.26511
																		1517	8	10.8	Block4287	0	368.765	0	-0.0544574		1517	8	10.8	Block4287	0.65	251.663	1.5	-2.14205
																		1518	8	10.83	Block4289	0	368.759	0	-0.103705		1518	8	10.83	Block4289	0.69	251.434	1.6	-2.22975
																		1519	8	10.853	Block4292	0	368.768	0	-0.0185806		1519	8	10.853	Block4292	0.63	251.775	1.4	-2.08828
																		1520	8	10.934	Block4293	0	368.768	0	-0.0185806		1520	8	10.934	Block4293	0.63	251.775	1.4	-2.08828
																		1521	8	10.992	Block4297	0	368.763	0	-0.0760633		1521	8	10.992	Block4297	0.63	251.735	1.5	-2.11418
																		1522	8	11.054	Block4306	0.01	368.702	0	-0.529047		1522	8	11.054	Block4306	0.6	251.909	1.4	-3.87287
																		1523	8	11.082	Block4307	0.02	368.639	0	-0.742508		1523	8	11.082	Block4307	0.65	251.668	1.5	-4.01836
																		1524	8	11.247	Block4344	0.69	362.919	1.6	-17.1018		1524	8	11.247	Block4344	0.46	252.75	1.1	-11.6326
																		1525	8	11.397	Block4362	2.14	350.921	4.8	-20.1424		1525	8	11.397	Block4362	1.04	249.409	2.4	-11.725
																		1526	8	11.418	Block4363	1.56	355.702	3.5	-14.921		1526	8	11.418	Block4363	0.77	250.936	1.8	-8.77569
																		1527	8	11.523	Block4389	0.69	362.919	1.6	-17.1018		1527	8	11.523	Block4389	0.46	252.75	1.1	-11.6326
																		1528	8	11.677	Block4416	0.02	368.629	0	-0.400592		1528	8	11.677	Block4416	0.83	250.587	1.9	-2.37046
																		1529	8	11.783	Block4432	0.04	368.42	0.1	-0.668834		1529	8	11.783	Block4432	0.96	249.871	2.2	-2.67805
																		1530	8	11.854	Block4441	0.69	362.919	1.6	-17.1018		1530	8	11.854	Block4441	0.46	252.75	1.1	-11.6326
																		1531	8	11.953	Block4443	0.41	365.25	1	-11.8865		1531	8	11.953	Block4443	0.26	253.941	0.6	-7.79949
																		1532	8	12.097	Block4451	0.39	365.492	0.9	-4.66267		1532	8	12.097	Block4451	0.02	255.349	0	0.841454
																		1533	8	12.297	Block4452	0.32	366.015	0.7	-4.06759		1533	8	12.297	Block4452	0	255.448	0	0.221782
																		1534	8	12.366	Block4454	0.8	362.02	1.8	-6.982		1534	8	12.366	Block4454	0	255.443	0	0.307826
																		1535	8	12.396	Block4457	0.67	363.116	1.5	-6.82428		1535	8	12.396	Block4457	0.03	255.303	0.1	1.12099
																		1536	8	12.76	Block4458	0.5	364.565	1.1	-5.78224		1536	8	12.76	Block4458	0.01	255.378	0	0.788509
																		1537	8	12.96	Block4460	0.83	361.722	1.9	-7.09291		1537	8	12.96	Block4460	0.03	255.269	0.1	-1.15624
																		1538	8	13.612	Block4461	1.05	359.931	2.4	-7.46609		1538	8	13.612	Block4461	0.1	254.837	0.2	-1.97542
																		1539	8	13.765	Block4462	1.43	356.772	3.3	-9.11787		1539	8	13.765	Block4462	0.17	254.44	0.4	-2.65282
																		1540	8	14.449	Block4463	1.41	356.956	3.2	-8.91906		1540	8	14.449	Block4463	0.17	254.47	0.4	-2.57617
																		1541	8	14.617	Block4464	1.52	356.048	3.4	-9.12917		1541	8	14.617	Block4464	0.25	254.01	0.6	-3.07747
																		1542	8	14.771	Block4471	0.8	361.97	1.8	-4.65044		1542	8	14.771	Block4471	0.38	253.2	0.9	-2.67898
																		1543	8	14.822	Block4473	0.64	363.341	1.5	-4.07196		1543	8	14.822	Block4473	0.32	253.551	0.7	-2.41229
																		1544	8	14.869	Block4479	0.09	368.04	0.2	1.87664		1544	8	14.869	Block4479	0.01	255.385	0	-0.585269
																		1545	8	14.976	Block4480	0.08	368.099	0.2	1.74213		1545	8	14.976	Block4480	0.01	255.426	0	-0.36722
																		1546	8	15.088	Block4484	0	368.738	0	0.337424		1546	8	15.088	Block4484	0.26	253.899	0.6	-2.42367
																		1547	8	15.132	Block4486	0.01	368.674	0	0.597243		1547	8	15.132	Block4486	0.2	254.268	0.5	-2.12939
																		1548	8	15.198	Block4491	0.06	368.269	0.1	1.46794		1548	8	15.198	Block4491	0.04	255.197	0.1	-1.05841
																		1549	8	15.231	Block4495	0.08	368.099	0.2	1.74213		1549	8	15.231	Block4495	0.01	255.426	0	-0.36722
																		1550	8	15.542	Block4500	0	368.738	0	0.337424		1550	8	15.542	Block4500	0.26	253.899	0.6	-2.42367
																		1551	8	15.671	Block4502	0	368.76	0	-0.1479		1551	8	15.671	Block4502	0.44	252.846	1	-2.75519
																		1552	8	15.723	Block4503	0	368.762	0	-0.128401		1552	8	15.723	Block4503	0.43	252.954	1	-2.68753
																		1553	8	16.118	Block4510	0.03	368.472	0.1	0.978416		1553	8	16.118	Block4510	0.07	255.02	0.2	-1.18783
																		1554	8	16.327	Block4511	0.07	368.182	0.2	1.34791		1554	8	16.327	Block4511	0.05	255.181	0.1	-0.923025
																		1555	8	16.448	Block4512	0.05	368.361	0.1	1.10118		1555	8	16.448	Block4512	0.06	255.073	0.1	-1.06876
																		1556	8	16.52	Block4513	0.12	367.775	0.3	1.69799		1556	8	16.52	Block4513	0.03	255.297	0.1	-0.679446
																		1557	8	16.581	Block4515	0.25	366.623	0.6	2.3189		1557	8	16.581	Block4515	0	255.455	0	-0.0342598
																		1558	8	16.682	Block4516	0.21	366.959	0.5	2.1726		1558	8	16.682	Block4516	0	255.434	0	-0.236296
																		1559	8	16.749	Block4518	0.05	368.361	0.1	1.10118		1559	8	16.749	Block4518	0.06	255.073	0.1	-1.06876
																		1560	8	16.893	Block4521	0	368.755	0	-0.19909		1560	8	16.893	Block4521	0.16	254.535	0.4	-1.69855
																		1561	8	17.163	Block4540	0.35	365.766	0.8	-1.76392		1561	8	17.163	Block4540	0.18	254.409	0.4	-1.04179
																		1562	8	17.197	Block4543	0.35	365.83	0.8	-1.75006		1562	8	17.197	Block4543	0.17	254.465	0.4	-1.01616
																		1563	8	17.3	Block4566	0	368.768	0	-0.0146907		1563	8	17.3	Block4566	0.14	254.633	0.3	-1.57417
																		1564	8	17.536	Block4586	0.3	366.259	0.7	-1.60869		1564	8	17.536	Block4586	0.15	254.589	0.3	-0.945586
																		1565	8	17.573	Block4597	0	368.768	0	-0.0146907		1565	8	17.573	Block4597	0.14	254.633	0.3	-1.57417
																		1566	8	17.743	Block4599	0.01	368.724	0	-0.369169		1566	8	17.743	Block4599	0.04	255.208	0.1	-0.877798
																		1567	8	17.859	Block4622	0.27	366.504	0.6	-1.52078		1567	8	17.859	Block4622	0.12	254.721	0.3	-0.866542
																		1568	8	17.907	Block4631	0.08	368.125	0.2	-1.50056		1568	8	17.907	Block4631	0.24	254.067	0.5	-2.20465
																		1569	8	18.03	Block4633	0	368.762	0	-0.157138		1569	8	18.03	Block4633	0.29	253.77	0.7	-2.68339
																		1570	8	18.155	Block4635	0.32	366.087	0.7	-2.82728		1570	8	18.155	Block4635	0.08	254.966	0.2	-1.2081
																		1571	8	18.186	Block4636	0.27	366.457	0.6	-2.63717		1571	8	18.186	Block4636	0.06	255.093	0.1	-1.04483
																		1572	8	18.308	Block4637	0.27	366.457	0.6	-2.63717		1572	8	18.308	Block4637	0.06	255.093	0.1	-1.04483
																		1573	8	18.394	Block4638	0.27	366.457	0.6	-2.63717		1573	8	18.394	Block4638	0.06	255.093	0.1	-1.04483
																		1574	8	18.422	Block4639	0.27	366.457	0.6	-2.63717		1574	8	18.422	Block4639	0.06	255.093	0.1	-1.04483
																		1575	8	18.711	Block4641	0.27	366.457	0.6	-2.63717		1575	8	18.711	Block4641	0.06	255.093	0.1	-1.04483
																		1576	8	18.792	Block4642	0.27	366.457	0.6	-2.63717		1576	8	18.792	Block4642	0.06	255.093	0.1	-1.04483
																		1577	8	19.148	Block4644	0.58	363.835	1.3	-3.97287		1577	8	19.148	Block4644	0.11	254.809	0.3	-1.43815
																		1578	8	20.148		0.53	364.165	1.2	-3.79868		1578	8	20.148		0.1	254.844	0.2	-1.3841
																		1579	8	21.116	Block4645	0.48	364.706	1.1	-3.55067		1579	8	21.116	Block4645	0.09	254.904	0.2	-1.30824
																		1580	8	21.143	Block4646	0.42	365.17	1	-3.32547		1580	8	21.143	Block4646	0.07	255.027	0.2	-1.14811
																		1581	8	21.403	Block4648	0.58	363.835	1.3	-3.97287		1581	8	21.403	Block4648	0.11	254.809	0.3	-1.43815
																		1582	8	21.462	Block4651	0.48	364.706	1.1	-3.55067		1582	8	21.462	Block4651	0.09	254.904	0.2	-1.30824
																		1583	8	21.498	Block4653	0.26	366.515	0.6	-2.44264		1583	8	21.498	Block4653	0.04	255.221	0.1	-0.788256
																		1584	8	21.575	Block4656	0.58	363.835	1.3	-3.97287		1584	8	21.575	Block4656	0.11	254.809	0.3	-1.43815
																		1585	8	21.755	Block4659	0.37	365.603	0.9	-3.13427		1585	8	21.755	Block4659	0.05	255.147	0.1	-0.979169
																		1586	8	21.896	Block4662	0.35	365.816	0.8	-2.98048		1586	8	21.896	Block4662	0.07	255.026	0.2	-1.13709
																		1587	8	21.96	Block4663	0.45	364.981	1	-3.3921		1587	8	21.96	Block4663	0.12	254.75	0.3	-1.46496
																		1588	8	22.008	Block4665	0.7	362.807	1.6	-4.48928		1588	8	22.008	Block4665	0.17	254.465	0.4	-1.83069
																		1589	8	22.275	Block4666	0.49	364.609	1.1	-3.64806		1589	8	22.275	Block4666	0.02	255.341	0	-0.605236
																		1590	8	22.501	Block4669	0.14	367.535	0.3	-1.83863		1590	8	22.501	Block4669	0	255.431	0	0.260805
																		1591	8	22.549	Block4670	0.04	368.402	0.1	-0.980884		1591	8	22.549	Block4670	0.01	255.394	0	0.40452
																		1592	8	22.599	Block4673	0.25	366.609	0.6	-2.5614		1592	8	22.599	Block4673	0.01	255.404	0	-0.396056
																		1593	8	22.669	Block4674	0.2	367.086	0.5	-2.31989		1593	8	22.669	Block4674	0	255.453	0	-0.0874758
																		1594	8	22.843	Block4675	0.17	367.304	0.4	-2.10941		1594	8	22.843	Block4675	0	255.427	0	0.294153
																		1595	8	22.955	Block4677	0.02	368.627	0	-0.611289		1595	8	22.955	Block4677	0.06	255.104	0.1	0.965904
																		1596	8	22.981	Block4678	0.02	368.635	0	-0.589911		1596	8	22.981	Block4678	0.06	255.074	0.1	1.00155
																		1597	8	23.062	Block4681	0.17	367.304	0.4	-2.10941		1597	8	23.062	Block4681	0	255.427	0	0.294153
																		1598	8	24.062		0.17	367.192	0.4	-2.14696		1598	8	24.062		0	255.429	0	0.281515
																		1599	8	25.062		0.18	367.092	0.5	-2.18162		1599	8	25.062		0	255.431	0	0.267882
																		1600	8	26.062		0.18	367.006	0.5	-2.2121		1600	8	26.062		0	255.433	0	0.253434
																		1601	8	27.062		0.18	366.935	0.5	-2.23866		1601	8	27.062		0	255.435	0	0.238404
																		1602	8	28.062		0.19	366.881	0.5	-2.26134		1602	8	28.062		0	255.438	0	0.222994
																		1603	8	29.062		0.19	366.843	0.5	-2.28015		1603	8	29.062		0	255.44	0	0.207359
																		1604	8	30.062		0.19	366.824	0.5	-2.29501		1604	8	30.062		0	255.442	0	0.191611
																		1605	8	31.062		0.2	366.823	0.5	-2.30578		1605	8	31.062		0	255.445	0	0.175828
																		1606	8	32.062		0.2	366.841	0.5	-2.31223		1606	8	32.062		0	255.447	0	0.160069
																		1607	8	33.062		0.2	366.88	0.5	-2.31414		1607	8	33.062		0	255.449	0	0.144386
																		1608	8	34.062		0.21	366.94	0.5	-2.31119		1608	8	34.062		0	255.45	0	0.128604
																		1609	8	34.857	Block4682	0.21	367.001	0.5	-2.30596		1609	8	34.857	Block4682	0	255.451	0	0.116682
																		1610	8	34.983	Block4683	0.24	366.734	0.6	-2.42645		1610	8	34.983	Block4683	0	255.455	0	-0.0557602
																		1611	8	35.124	Block4684	0.17	367.304	0.4	-2.10941		1611	8	35.124	Block4684	0	255.427	0	0.294153
																		1612	8	35.445	Block4685	0.21	367.001	0.5	-2.30596		1612	8	35.445	Block4685	0	255.451	0	0.116682
																		1613	8	35.977	Block4686	0.17	367.304	0.4	-2.10941		1613	8	35.977	Block4686	0	255.427	0	0.294153
																		1614	8	36.404	Block4687	0.24	366.734	0.6	-2.42645		1614	8	36.404	Block4687	0	255.455	0	-0.0557602
																		1615	8	36.556	Block4688	0.21	367.001	0.5	-2.30596		1615	8	36.556	Block4688	0	255.451	0	0.116682
																		1616	8	37.556		0.19	367.135	0.4	-2.21681		1616	8	37.556		0	255.442	0	0.202941
																		1617	8	38.556		0.17	367.294	0.4	-2.11573		1617	8	38.556		0	255.428	0	0.289109
																		1618	8	38.615	Block4689	0.17	367.304	0.4	-2.10941		1618	8	38.615	Block4689	0	255.427	0	0.294153
																		1619	8	38.881	Block4691	0.12	367.719	0.3	-1.82209		1619	8	38.881	Block4691	0.01	255.38	0	0.490285
																		1620	8	39.881		0	368.767	0	0.0451963		1620	8	39.881		0.11	254.55	0.4	-2.07115
																		1621	8	40.271	Block4693	0.04	368.445	0.1	1.36827		1621	8	40.271	Block4693	0.23	254.084	0.5	-2.81825
																		1622	8	40.641	Block4702	0.04	368.445	0.1	1.36827		1622	8	40.641	Block4702	0.23	254.084	0.5	-2.81825
																		1623	8	40.745	Block4707	0.04	368.436	0.1	-0.88128		1623	8	40.745	Block4707	0.97	249.79	2.2	-3.64355
																		1624	8	40.888	Block4708	0.02	368.611	0	-0.607893		1624	8	40.888	Block4708	0.84	250.522	1.9	-3.41043
																		1625	8	40.934	Block4711	0	368.767	0	-0.0471082		1625	8	40.934	Block4711	0.7	251.37	1.6	-4.22583
																		1626	8	40.997	Block4715	0.04	368.445	0.1	1.36827		1626	8	40.997	Block4715	0.23	254.084	0.5	-2.81825
																		1627	8	41.997		0.08	367.947	0.2	2.55093		1627	8	41.997		0.21	254.109	0.5	-3.25781
																		1628	8	42.18	Block4716	0.08	368.105	0.2	2.38096		1628	8	42.18	Block4716	0.18	254.411	0.4	-2.98925
																		1629	8	42.289	Block4718	0.07	368.132	0.2	2.28931		1629	8	42.289	Block4718	0.25	253.962	0.6	-3.50826
																		1630	8	42.373	Block4721	0.06	368.283	0.1	1.87173		1630	8	42.373	Block4721	0.3	253.685	0.7	-3.57634
																		1631	8	42.44	Block4722	0.02	368.575	0.1	1.16419		1631	8	42.44	Block4722	0.33	253.501	0.8	-3.70326
																		1632	8	42.489	Block4724	0.02	368.565	0.1	1.17517		1632	8	42.489	Block4724	0.3	253.671	0.7	-3.48855
																		1633	8	42.543	Block4730	0.02	368.62	0	0.771135		1633	8	42.543	Block4730	0.26	253.895	0.6	-2.50934
																		1634	8	42.642	Block4734	0.04	368.392	0.1	1.57942		1634	8	42.642	Block4734	0.26	253.942	0.6	-3.16989
																		1635	8	42.683	Block4736	0.04	368.402	0.1	1.57948		1635	8	42.683	Block4736	0.28	253.792	0.7	-3.36863
																		1636	8	42.718	Block4739	0.08	368.105	0.2	2.38096		1636	8	42.718	Block4739	0.18	254.411	0.4	-2.98925
																		1637	8	42.934	Block4740	0.01	368.67	0	0.849777		1637	8	42.934	Block4740	0.23	254.116	0.5	-3.14178
																		1638	8	42.973	Block4741	0	368.74	0	0.449423		1638	8	42.973	Block4741	0.23	254.112	0.5	-3.09744
																		1639	8	43.234	Block4742	0.01	368.691	0	-0.728106		1639	8	43.234	Block4742	0.39	253.134	0.9	-4.01106
																		1640	8	43.268	Block4744	0	368.743	0	-0.391784		1640	8	43.268	Block4744	0.56	252.159	1.3	-4.52845
																		1641	8	43.29	Block4745	0	368.748	0	-0.343608		1641	8	43.29	Block4745	0.52	252.382	1.2	-4.31959
																		1642	8	43.416	Block4747	0	368.767	0	-0.0773503		1642	8	43.416	Block4747	0.54	252.297	1.2	-4.3274
																		1643	8	43.465	Block4748	0	368.748	0	-0.343608		1643	8	43.465	Block4748	0.52	252.382	1.2	-4.31959
																		1644	8	43.527	Block4750	0	368.767	0	-0.0659258		1644	8	43.527	Block4750	0.57	252.094	1.3	-3.90581
																		1645	8	43.598	Block4751	0	368.766	0	-0.0965027		1645	8	43.598	Block4751	0.61	251.904	1.4	-4.04955
																		1646	8	43.638	Block4754	0	368.743	0	-0.391784		1646	8	43.638	Block4754	0.56	252.159	1.3	-4.52845
																		1647	8	43.753	Block4758	0.02	368.613	0	-0.819713		1647	8	43.753	Block4758	0.77	250.922	1.8	-4.43544
																		1648	8	43.84	Block4759	0	368.736	0	0.359676		1648	8	43.84	Block4759	0.55	252.232	1.3	-3.60589
																		1649	8	43.96	Block4765	0.09	368.034	0.2	2.15108		1649	8	43.96	Block4765	0.1	254.867	0.2	-1.92788
																		1650	8	44.005	Block4766	0.09	368.034	0.2	2.15108		1650	8	44.005	Block4766	0.1	254.867	0.2	-1.92788
																		1651	8	44.06	Block4768	0	368.766	0	0.110822		1651	8	44.06	Block4768	0.44	252.858	1	-3.90012
																		1652	8	44.148	Block4772	0.09	368.034	0.2	2.15108		1652	8	44.148	Block4772	0.1	254.867	0.2	-1.92788
																		1653	8	44.332	Block4773	0.02	368.584	0	1.06358		1653	8	44.332	Block4773	0.21	254.208	0.5	-2.76995
																		1654	8	44.356	Block4774	0	368.726	0	0.50318		1654	8	44.356	Block4774	0.28	253.824	0.6	-3.12833
																		1655	8	44.418	Block4777	0.21	366.953	0.5	3.59984		1655	8	44.418	Block4777	0.06	255.082	0.1	-1.63347
																		1656	8	44.678	Block4778	0.52	364.384	1.2	4.97922		1656	8	44.678	Block4778	0.01	255.423	0	0.428678
																		1657	8	44.727	Block4779	0.43	365.11	1	4.49756		1657	8	44.727	Block4779	0	255.455	0	-0.0490366
																		1658	8	44.843	Block4782	0.84	361.647	1.9	7.1306		1658	8	44.843	Block4782	0.23	254.114	0.5	3.09574
																		1659	8	45.037	Block4783	0.94	360.828	2.2	7.41787		1659	8	45.037	Block4783	0.23	254.097	0.5	3.06922
																		1660	8	45.11	Block4785	0.84	361.647	1.9	7.1306		1660	8	45.11	Block4785	0.23	254.114	0.5	3.09574
																		1661	8	45.175	Block4790	0.34	365.883	0.8	3.81358		1661	8	45.175	Block4790	0	255.429	0	-0.368495
																		1662	8	45.406	Block4796	0.71	362.753	1.6	6.45665		1662	8	45.406	Block4796	0.14	254.612	0.3	2.41796
																		1663	8	45.576	Block4797	0.84	361.647	1.9	7.1306		1663	8	45.576	Block4797	0.23	254.114	0.5	3.09574
																		1664	8	45.917	Block4798	0.74	362.512	1.7	7.17942		1664	8	45.917	Block4798	0.15	254.545	0.4	2.73999
																		1665	8	46.102	Block4799	1.2	358.688	2.7	9.91821		1665	8	46.102	Block4799	0.45	252.797	1	5.09364
																		1666	8	46.175	Block4801	0.16	367.427	0.4	2.00888		1666	8	46.175	Block4801	0.01	255.369	0	-0.510959
																		1667	8	46.229	Block4805	0.16	367.442	0.4	1.98816		1667	8	46.229	Block4805	0.03	255.276	0.1	-0.73315
																		1668	8	46.277	Block4806	0.15	367.495	0.3	1.91135		1668	8	46.277	Block4806	0.05	255.158	0.1	-0.923939
																		1669	8	46.396	Block4807	0.13	367.667	0.3	1.81136		1669	8	46.396	Block4807	0.06	255.109	0.1	-1.01632
																		1670	8	46.549	Block4813	1.24	358.337	2.8	10.892		1670	8	46.549	Block4813	0.49	252.577	1.1	5.72183
																		1671	8	46.868	Block4818	0.4	365.405	0.9	4.58292		1671	8	46.868	Block4818	0	255.446	0	0.250915
																		1672	8	46.925	Block4821	0.11	367.825	0.3	1.47778		1672	8	46.925	Block4821	0.05	255.176	0.1	-0.804848
																		1673	8	47.087	Block4823	0.03	368.54	0.1	0.702173		1673	8	47.087	Block4823	0.19	254.331	0.4	-1.5616
																		1674	8	47.282	Block4824	0.02	368.604	0	0.587235		1674	8	47.282	Block4824	0.19	254.348	0.4	-1.52577
																		1675	8	47.399	Block4825	0	368.764	0	0.0981287		1675	8	47.399	Block4825	0.26	253.945	0.6	-1.83898
																		1676	8	47.476	Block4826	0.01	368.662	0	0.495585		1676	8	47.476	Block4826	0.13	254.718	0.3	-1.30758
																		1677	8	47.547	Block4829	0.04	368.422	0.1	0.854479		1677	8	47.547	Block4829	0.07	255.051	0.2	-0.92424
																		1678	8	47.619	Block4832	0.04	368.386	0.1	0.940135		1678	8	47.619	Block4832	0.04	255.197	0.1	-0.774591
																		1679	9	0.648	Block4833	0.94	360.865	2.1	-5.80913		1679	9	0.648	Block4833	0.86	250.422	2	-4.63606
																		1680	9	0.688	Block4834	0.94	360.865	2.1	-5.80913		1680	9	0.688	Block4834	0.86	250.422	2	-4.63606
																		1681	9	0.887	Block4835	0.82	361.8	1.9	-5.30143		1681	9	0.887	Block4835	0.75	251.032	1.7	-4.22409
																		1682	9	1.047	Block4837	0.7	362.849	1.6	-6.50087		1682	9	1.047	Block4837	0.48	252.655	1.1	-4.47171
																		1683	9	1.389	Block4842	2.44	348.542	5.5	-10.2931		1683	9	1.389	Block4842	0.83	250.602	1.9	-5.04251
																		1684	9	1.552	Block4843	2.19	350.505	5	-10.1632		1684	9	1.552	Block4843	0.64	251.675	1.5	-4.62448
																		1685	9	1.63	Block4846	1.36	357.305	3.1	-9.18906		1685	9	1.63	Block4846	0.15	254.542	0.4	-2.59394
																		1686	9	1.76	Block4847	1.24	358.359	2.8	-9.43359		1686	9	1.76	Block4847	0.08	254.979	0.2	-2.01831
																		1687	9	1.793	Block4848	1.14	359.176	2.6	-9.89443		1687	9	1.793	Block4848	0.01	255.41	0	-0.681237
																		1688	9	2.152	Block4849	1.24	358.359	2.8	-9.43359		1688	9	2.152	Block4849	0.08	254.979	0.2	-2.01831
																		1689	9	2.238	Block4850	1.25	358.285	2.8	-10.1142		1689	9	2.238	Block4850	0.04	255.232	0.1	-1.47758
																		1690	9	2.259	Block4851	1.24	358.359	2.8	-9.43359		1690	9	2.259	Block4851	0.08	254.979	0.2	-2.01831
																		1691	9	2.352	Block4852	1.25	358.285	2.8	-10.1142		1691	9	2.352	Block4852	0.04	255.232	0.1	-1.47758
																		1692	9	2.406	Block4853	1.14	359.176	2.6	-9.89443		1692	9	2.406	Block4853	0.01	255.41	0	-0.681237
																		1693	9	2.437	Block4854	0.84	361.665	1.9	-7.79244		1693	9	2.437	Block4854	0.07	255.03	0.2	1.90842
																		1694	9	3.437		0.96	360.61	2.2	-7.77664		1694	9	3.437		0.02	255.356	0	0.863707
																		1695	9	3.513	Block4855	0.97	360.561	2.2	-7.77504		1695	9	3.513	Block4855	0.01	255.371	0	0.78936
																		1696	9	3.66	Block4856	0.94	360.798	2.2	-8.10375		1696	9	3.66	Block4856	0.04	255.231	0.1	1.36115
																		1697	9	3.698	Block4857	0.97	360.561	2.2	-7.77504		1697	9	3.698	Block4857	0.01	255.371	0	0.78936
																		1698	9	3.773	Block4858	0.94	360.798	2.2	-8.10375		1698	9	3.773	Block4858	0.04	255.231	0.1	1.36115
																		1699	9	3.811	Block4859	0.84	361.665	1.9	-7.79244		1699	9	3.811	Block4859	0.07	255.03	0.2	1.90842
																		1700	9	3.919	Block4861	0.39	365.414	0.9	-4.19146		1700	9	3.919	Block4861	0.08	254.966	0.2	1.60135
																		1701	9	4.919		0.47	364.784	1.1	-4.70185		1701	9	4.919		0.07	255.029	0.2	1.53688
																		1702	9	5.231	Block4862	0.49	364.631	1.1	-4.8372		1702	9	5.231	Block4862	0.07	255.05	0.2	1.51434
																		1703	9	5.468	Block4865	0.84	361.665	1.9	-7.79244		1703	9	5.468	Block4865	0.07	255.03	0.2	1.90842
																		1704	9	6.468		0.84	359.426	2.5	-7.88176		1704	9	6.468		0.07	254.908	0.2	1.9107
																		1705	9	7.468		0.84	357.433	3.1	-7.93364		1705	9	7.468		0.07	254.805	0.3	1.90485
																		1706	9	8.468		0.83	355.719	3.5	-7.95138		1706	9	8.468		0.07	254.722	0.3	1.88846
																		1707	9	9.468		0.82	354.324	3.9	-7.9315		1707	9	9.468		0.07	254.66	0.3	1.86435
																		1708	9	10.468		0.81	353.224	4.2	-7.88628		1708	9	10.468		0.06	254.618	0.3	1.83347
																		1709	9	11.468		0.8	352.455	4.4	-7.80767		1709	9	11.468		0.06	254.597	0.3	1.79276
																		1710	9	12.468		0.79	352.009	4.5	-7.69807		1710	9	12.468		0.06	254.589	0.3	1.75138
																		1711	9	13.468		0.78	351.826	4.6	-7.56987		1711	9	13.468		0.06	254.6	0.3	1.70211
																		1712	9	14.468		0.76	351.925	4.6	-7.41537		1712	9	14.468		0.06	254.622	0.3	1.64994
																		1713	9	15.468		0.75	352.255	4.5	-7.24208		1713	9	15.468		0.05	254.653	0.3	1.59579
																		1714	9	16.468		0.73	352.783	4.3	-7.05262		1714	9	16.468		0.05	254.692	0.3	1.54037
																		1715	9	17.468		0.72	353.497	4.1	-6.84505		1715	9	17.468		0.05	254.74	0.3	1.48068
																		1716	9	18.468		0.7	354.319	3.9	-6.63192		1716	9	18.468		0.05	254.787	0.3	1.42503
																		1717	9	19.468		0.69	355.255	3.7	-6.40659		1717	9	19.468		0.05	254.84	0.2	1.36592
																		1718	9	20.468		0.67	356.256	3.4	-6.17643		1718	9	20.468		0.05	254.89	0.2	1.31166
																		1719	9	21.468		0.66	357.291	3.1	-5.94403		1719	9	21.468		0.04	254.943	0.2	1.25486
																		1720	9	22.468		0.64	358.339	2.8	-5.71164		1720	9	22.468		0.04	254.993	0.2	1.20265
																		1721	9	23.468		0.63	359.38	2.5	-5.48107		1721	9	23.468		0.04	255.042	0.2	1.14904
																		1722	9	24.468		0.61	360.399	2.3	-5.2538		1722	9	24.468		0.04	255.09	0.1	1.09704
																		1723	9	25.468		0.6	361.385	2	-5.03092		1723	9	25.468		0.04	255.136	0.1	1.04676
																		1724	9	26.468		0.58	362.331	1.7	-4.8132		1724	9	26.468		0.04	255.178	0.1	1.00041
																		1725	9	27.468		0.57	363.235	1.5	-4.59985		1725	9	27.468		0.04	255.218	0.1	0.95377
																		1726	9	28.384	Block4866	0.56	364.014	1.3	-4.41172		1726	9	28.384	Block4866	0.03	255.253	0.1	0.912407
																		1727	9	29.384		0.51	364.22	1.2	-4.15409		1727	9	29.384		0.04	255.218	0.1	0.946954
																		1728	9	30.384		0.46	364.593	1.1	-3.85694		1728	9	30.384		0.04	255.19	0.1	0.969028
																		1729	9	31.384		0.41	365.08	1	-3.53122		1729	9	31.384		0.05	255.17	0.1	0.979421
																		1730	9	32.384		0.37	365.617	0.9	-3.1937		1730	9	32.384		0.05	255.159	0.1	0.97905
																		1731	9	32.687	Block4868	0.35	365.781	0.8	-3.09171		1731	9	32.687	Block4868	0.05	255.158	0.1	0.976988
																		1732	9	32.856	Block4870	0.35	365.781	0.8	-3.09171		1732	9	32.856	Block4870	0.05	255.158	0.1	0.976988
																		1733	9	33.515	Block4874	0.65	363.283	1.5	-3.96668		1733	9	33.515	Block4874	0.06	255.111	0.1	-0.994987
																		1734	9	33.662	Block4893	0.35	365.781	0.8	-3.09171		1734	9	33.662	Block4893	0.05	255.158	0.1	0.976988
																		1735	9	33.826	Block4895	0.61	363.561	1.4	-3.94571		1735	9	33.826	Block4895	0.01	255.394	0	-0.429402
																		1736	9	33.874	Block4903	0.69	362.948	1.6	-3.41148		1736	9	33.874	Block4903	0.3	253.704	0.7	-1.87168
																		1737	9	33.97	Block4914	0.65	363.283	1.5	-3.96668		1737	9	33.97	Block4914	0.06	255.111	0.1	-0.994987
																		1738	9	33.997	Block4918	0.77	362.267	1.8	-3.61304		1738	9	33.997	Block4918	0.34	253.452	0.8	-2.00613
																		1739	9	34.019	Block4919	0.87	361.415	2	-3.83456		1739	9	34.019	Block4919	0.42	253.004	1	-2.21437
																		1740	9	34.121	Block4921	0.87	361.415	2	-3.83456		1740	9	34.121	Block4921	0.42	253.004	1	-2.21437
																		1741	9	34.181	Block4922	0.77	362.267	1.8	-3.61304		1741	9	34.181	Block4922	0.34	253.452	0.8	-2.00613
																		1742	9	34.249	Block4925	0.65	363.283	1.5	-3.96668		1742	9	34.249	Block4925	0.06	255.111	0.1	-0.994987
																		1743	9	34.377	Block4928	0.35	365.781	0.8	-3.09171		1743	9	34.377	Block4928	0.05	255.158	0.1	0.976988
																		1744	9	34.648	Block4931	0.65	363.283	1.5	-3.96668		1744	9	34.648	Block4931	0.06	255.111	0.1	-0.994987
																		1745	9	34.776	Block4933	0.35	365.781	0.8	-3.09171		1745	9	34.776	Block4933	0.05	255.158	0.1	0.976988
																		1746	9	35.484	Block4935	0.35	365.781	0.8	-3.09171		1746	9	35.484	Block4935	0.05	255.158	0.1	0.976988
																		1747	9	35.817	Block4938	0.65	363.283	1.5	-3.96668		1747	9	35.817	Block4938	0.06	255.111	0.1	-0.994987
																		1748	9	36	Block4943	0.44	365.057	1	-3.41075		1748	9	36	Block4943	0.02	255.332	0	0.623168
																		1749	9	36.025	Block4945	0.65	363.283	1.5	-3.96668		1749	9	36.025	Block4945	0.06	255.111	0.1	-0.994987
																		1750	9	36.203	Block4948	0.35	365.781	0.8	-3.09171		1750	9	36.203	Block4948	0.05	255.158	0.1	0.976988
																		1751	9	36.359	Block4952	0.65	363.283	1.5	-3.96668		1751	9	36.359	Block4952	0.06	255.111	0.1	-0.994987
																		1752	9	36.518	Block4956	0.35	365.781	0.8	-3.09171		1752	9	36.518	Block4956	0.05	255.158	0.1	0.976988
																		1753	9	36.567	Block4959	0.65	363.283	1.5	-3.96668		1753	9	36.567	Block4959	0.06	255.111	0.1	-0.994987
																		1754	9	36.698	Block4964	0.9	361.151	2.1	-3.95977		1754	9	36.698	Block4964	0.39	253.16	0.9	-2.17381
																		1755	9	36.747	Block4972	0.35	365.781	0.8	-3.09171		1755	9	36.747	Block4972	0.05	255.158	0.1	0.976988
																		1756	9	36.828	Block4974	0.35	365.781	0.8	-3.09171		1756	9	36.828	Block4974	0.05	255.158	0.1	0.976988
																		1757	9	37.002	Block4976	0.56	364.014	1.3	-4.41172		1757	9	37.002	Block4976	0.03	255.253	0.1	0.912407
																		1758	9	37.512	Block4980	0.02	368.565	0.1	-1.22314		1758	9	37.512	Block4980	0	255.456	0	-0.00279018
																		1759	9	38.427	Block4981	0	368.758	0	0.293005		1759	9	38.427	Block4981	0.06	255.086	0.1	-1.77772
																		1760	9	38.984	Block4982	0.14	367.544	0.3	2.81613		1760	9	38.984	Block4982	0	255.447	0	0.23534
																		1761	9	39.808	Block4983	0.08	368.062	0.2	2.10988		1761	9	39.808	Block4983	0.02	255.332	0	0.883737
																		1762	9	40.134	Block4985	0.08	368.062	0.2	2.10988		1762	9	40.134	Block4985	0.02	255.332	0	0.883737
																		1763	9	40.61	Block4986	0.05	368.344	0.1	1.61344		1763	9	40.61	Block4986	0.01	255.414	0	0.504502
																		1764	9	40.935	Block4987	0.08	368.062	0.2	2.10988		1764	9	40.935	Block4987	0.02	255.332	0	0.883737
																		1765	9	41.192	Block4988	0.05	368.344	0.1	1.61344		1765	9	41.192	Block4988	0.01	255.414	0	0.504502
																		1766	9	41.336	Block4989	0.08	368.062	0.2	2.10988		1766	9	41.336	Block4989	0.02	255.332	0	0.883737
																		1767	9	41.395	Block4990	0.05	368.344	0.1	1.61344		1767	9	41.395	Block4990	0.01	255.414	0	0.504502
																		1768	9	41.819	Block4992	0.01	368.714	0	0.554156		1768	9	41.819	Block4992	0.01	255.423	0	-0.432462
																		1769	9	41.921	Block4994	0	368.76	0	0.158838		1769	9	41.921	Block4994	0	255.455	0	-0.045222
																		1770	9	41.985	Block4998	0	368.749	0	-0.371763		1770	9	41.985	Block4998	0	255.427	0	0.463616
																		1771	9	42.134	Block4999	0.07	368.143	0.2	-1.90184		1771	9	42.134	Block4999	0.05	255.169	0.1	-1.28792
																		1772	9	42.168	Block5001	0	368.749	0	-0.371763		1772	9	42.168	Block5001	0	255.427	0	0.463616
																		1773	9	42.923	Block5003	0.03	368.519	0.1	-1.3132		1773	9	42.923	Block5003	0.01	255.412	0	-0.552765
																		1774	9	42.973	Block5004	0.07	368.143	0.2	-1.90184		1774	9	42.973	Block5004	0.05	255.169	0.1	-1.28792
																		1775	9	43.25	Block5006	0.03	368.519	0.1	-1.3132		1775	9	43.25	Block5006	0.01	255.412	0	-0.552765
																		1776	9	43.281	Block5008	0	368.749	0	-0.371763		1776	9	43.281	Block5008	0	255.427	0	0.463616
																		1777	9	43.475	Block5010	0.03	368.519	0.1	-1.3132		1777	9	43.475	Block5010	0.01	255.412	0	-0.552765
																		1778	9	43.514	Block5011	0.05	368.337	0.1	-1.64951		1778	9	43.514	Block5011	0.02	255.336	0	-0.869162
																		1779	9	43.708	Block5016	0.64	363.336	1.5	3.8445		1779	9	43.708	Block5016	0.44	252.857	1	2.65908
																		1780	9	43.795	Block5020	0.5	364.5	1.2	3.33686		1780	9	43.795	Block5020	0.29	253.753	0.7	2.10797
																		1781	9	43.844	Block5021	0.58	363.877	1.3	3.63375		1781	9	43.844	Block5021	0.37	253.305	0.8	2.40984
																		1782	9	43.962	Block5022	0.64	363.336	1.5	3.8445		1782	9	43.962	Block5022	0.44	252.857	1	2.65908
																		1783	9	44.082	Block5023	0.76	362.337	1.7	4.19973		1783	9	44.082	Block5023	0.55	252.224	1.3	2.97745
																		1784	9	44.298	Block5024	0.66	363.196	1.5	3.89373		1784	9	44.298	Block5024	0.66	251.607	1.5	3.23609
																		1785	9	44.435	Block5025	0.55	364.112	1.3	3.49813		1785	9	44.435	Block5025	0.75	251.061	1.7	3.3989
																		1786	9	44.949	Block5026	0.62	363.476	1.4	3.71577		1786	9	44.949	Block5026	0.82	250.657	1.9	3.53838
																		1787	9	45.101	Block5027	0.55	364.112	1.3	3.49813		1787	9	45.101	Block5027	0.75	251.061	1.7	3.3989
																		1788	9	45.178	Block5028	0.93	360.909	2.1	4.29093		1788	9	45.178	Block5028	0.88	250.313	2	3.47133
																		1789	9	45.43	Block5029	1.02	360.139	2.3	4.48303		1789	9	45.43	Block5029	0.95	249.898	2.2	3.59782
																		1790	9	45.611	Block5031	0.55	364.11	1.3	3.36403		1790	9	45.611	Block5031	0.38	253.21	0.9	2.33619
																		1791	9	45.649	Block5032	0.48	364.691	1.1	3.15784		1791	9	45.649	Block5032	0.34	253.482	0.8	2.19722
																		1792	9	45.756	Block5033	0.55	364.11	1.3	3.36403		1792	9	45.756	Block5033	0.38	253.21	0.9	2.33619
																		1793	9	45.78	Block5034	0.48	364.691	1.1	3.15784		1793	9	45.78	Block5034	0.34	253.482	0.8	2.19722
																		1794	9	46.129	Block5038	0.37	365.638	0.8	2.69419		1794	9	46.129	Block5038	0.13	254.702	0.3	1.32224
																		1795	9	46.175	Block5039	0.23	366.795	0.5	2.13387		1795	9	46.175	Block5039	0.05	255.138	0.1	0.856881
																		1796	9	46.257	Block5042	0.16	367.422	0.4	1.68886		1796	9	46.257	Block5042	0.02	255.353	0	0.46753
																		1797	9	46.34	Block5046	0.23	366.795	0.5	2.13387		1797	9	46.34	Block5046	0.05	255.138	0.1	0.856881
																		1798	9	46.366	Block5050	0.55	364.11	1.3	3.36403		1798	9	46.366	Block5050	0.38	253.21	0.9	2.33619
																		1799	9	46.459	Block5051	0.48	364.691	1.1	3.15784		1799	9	46.459	Block5051	0.34	253.482	0.8	2.19722
																		1800	9	46.627	Block5052	0.48	364.691	1.1	3.15784		1800	9	46.627	Block5052	0.34	253.482	0.8	2.19722
																		1801	9	46.819	Block5055	0.13	367.654	0.3	1.45018		1801	9	46.819	Block5055	0	255.427	0	0.232529
																		1802	9	47.01	Block5060	0.3	366.213	0.7	2.43428		1802	9	47.01	Block5060	0.11	254.824	0.2	1.21035
																		1803	9	47.083	Block5065	0.99	360.4	2.3	4.07178		1803	9	47.083	Block5065	0.48	252.606	1.1	2.37617
																		1804	9	47.271	Block5069	0.88	361.375	2	3.48384		1804	9	47.271	Block5069	0.28	253.783	0.7	1.65739
																		1805	9	47.419	Block5070	0.95	360.754	2.2	3.66123		1805	9	47.419	Block5070	0.34	253.454	0.8	1.83008
																		1806	9	47.467	Block5071	0.88	361.375	2	3.48384		1806	9	47.467	Block5071	0.28	253.783	0.7	1.65739
																		1807	9	47.563	Block5072	0.8	361.998	1.8	3.33701		1807	9	47.563	Block5072	0.25	253.983	0.6	1.5568
																		1808	9	47.59	Block5075	0.32	366.032	0.7	2.2441		1808	9	47.59	Block5075	0.08	254.972	0.2	0.943627
																		1809	9	47.632	Block5076	0.37	365.607	0.9	2.40846		1809	9	47.632	Block5076	0.1	254.848	0.2	1.05649
																		1810	9	47.788	Block5078	0.43	365.148	1	2.60986		1810	9	47.788	Block5078	0.14	254.642	0.3	1.23727
																		1811	9	47.83	Block5079	0.6	363.693	1.4	3.12496		1811	9	47.83	Block5079	0.24	254.045	0.6	1.64782
																		1812	9	47.963	Block5082	0.5	364.492	1.2	2.97263		1812	9	47.963	Block5082	0.21	254.203	0.5	1.60908
																		1813	9	48.016	Block5087	0.73	362.591	1.7	3.65051		1813	9	48.016	Block5087	0.4	253.108	0.9	2.2506
																		1814	9	48.124	Block5091	0.38	365.513	0.9	2.5621		1814	9	48.124	Block5091	0.14	254.646	0.3	1.27792
																		1815	9	48.154	Block5092	0.32	366.032	0.7	2.2441		1815	9	48.154	Block5092	0.08	254.972	0.2	0.943627
																		1816	9	48.385	Block5093	0.32	366.032	0.7	2.2441		1816	9	48.385	Block5093	0.08	254.972	0.2	0.943627
																		1817	9	48.429	Block5098	0.42	365.205	1	2.86011		1817	9	48.429	Block5098	0.23	254.11	0.5	1.75775
																		1818	9	48.529	Block5099	0.31	366.166	0.7	2.3531		1818	9	48.529	Block5099	0.13	254.671	0.3	1.29245
																		1819	9	48.644	Block5101	0.18	367.27	0.4	1.74126		1819	9	48.644	Block5101	0.06	255.118	0.1	0.82763
																		1820	9	48.709	Block5102	0.2	367.052	0.5	1.84178		1820	9	48.709	Block5102	0.06	255.11	0.1	0.826442
																		1821	9	48.841	Block5104	0.11	367.851	0.2	1.31548		1821	9	48.841	Block5104	0.01	255.389	0	0.355849
																		1822	9	49.794	Block5110	0.24	366.725	0.6	2.1767		1822	9	49.794	Block5110	0.13	254.715	0.3	1.31058
																		1823	9	49.902	Block5111	0.24	366.742	0.5	2.17337		1823	9	49.902	Block5111	0.12	254.754	0.3	1.27943
																		1824	10	0.022	Block5112	0.14	367.537	0.3	-1.87919		1824	10	0.022	Block5112	0.31	253.62	0.7	-2.29511
																		1825	10	0.475	Block5113	0.1	367.934	0.2	-1.55364		1825	10	0.475	Block5113	0.23	254.071	0.5	-2.00212
																		1826	10	1.475		0.03	368.548	0.1	-0.826598		1826	10	1.475		0.1	254.854	0.2	-1.36996
																		1827	10	1.669	Block5118	0.02	368.632	0	-0.655717		1827	10	1.669	Block5118	0.07	255.037	0.2	-1.15187
																		1828	10	1.731	Block5119	0.01	368.71	0	-0.432159		1828	10	1.731	Block5119	0.05	255.157	0.1	-0.978281
																		1829	10	1.993	Block5120	0.02	368.632	0	-0.655717		1829	10	1.993	Block5120	0.07	255.037	0.2	-1.15187
																		1830	10	2.413	Block5122	0.03	368.494	0.1	-1.1343		1830	10	2.413	Block5122	0.02	255.342	0	-0.732364
																		1831	10	2.444	Block5123	0.08	368.071	0.2	-1.89163		1831	10	2.444	Block5123	0.03	255.291	0.1	-0.920821
																		1832	10	2.5	Block5124	0.16	367.432	0.4	-2.7483		1832	10	2.5	Block5124	0.05	255.189	0.1	-1.22823
																		1833	10	2.643	Block5125	0.19	367.137	0.4	-2.9227		1833	10	2.643	Block5125	0.07	255.059	0.2	-1.44156
																		1834	10	2.733	Block5127	0.46	364.876	1.1	-5.35417		1834	10	2.733	Block5127	0.2	254.269	0.5	-2.9567
																		1835	10	2.936	Block5128	0.34	365.864	0.8	-4.98273		1835	10	2.936	Block5128	0.12	254.76	0.3	-2.43934
																		1836	10	3.044	Block5129	0.37	365.584	0.9	-4.54218		1836	10	3.044	Block5129	0.46	252.776	1	-4.16662
																		1837	10	3.091	Block5130	0.44	364.998	1	-4.87636		1837	10	3.091	Block5130	0.53	252.355	1.2	-4.42251
																		1838	10	3.162	Block5132	0.21	366.939	0.5	-5.34129		1838	10	3.162	Block5132	0.79	250.823	1.8	-8.5024
																		1839	10	3.22	Block5133	0.21	366.939	0.5	-5.34129		1839	10	3.22	Block5133	0.79	250.823	1.8	-8.5024
																		1840	10	3.293	Block5134	0.26	366.589	0.6	-5.25904		1840	10	3.293	Block5134	0.79	250.842	1.8	-7.65295
																		1841	10	3.545	Block5135	0.21	366.939	0.5	-5.34129		1841	10	3.545	Block5135	0.79	250.823	1.8	-8.5024
																		1842	10	3.976	Block5136	0.26	366.589	0.6	-5.25904		1842	10	3.976	Block5136	0.79	250.842	1.8	-7.65295
																		1843	10	4.069	Block5137	0.16	367.414	0.4	-4.59641		1843	10	4.069	Block5137	0.56	252.176	1.3	-7.15378
																		1844	10	4.108	Block5140	0.24	366.751	0.5	-9.00041		1844	10	4.108	Block5140	0.24	254.049	0.6	-7.51694
																		1845	10	4.14	Block5141	0.14	367.611	0.3	-7.60404		1845	10	4.14	Block5141	0.14	254.622	0.3	-6.45657
																		1846	10	4.554	Block5142	0.24	366.751	0.5	-9.00041		1846	10	4.554	Block5142	0.24	254.049	0.6	-7.51694
																		1847	10	4.815	Block5143	0.14	367.611	0.3	-7.60404		1847	10	4.815	Block5143	0.14	254.622	0.3	-6.45657
																		1848	10	4.864	Block5144	0	368.741	0	-1.04848		1848	10	4.864	Block5144	0	255.431	0	-0.997972
																		1849	10	4.911	Block5145	0	368.758	0	0.586757		1849	10	4.911	Block5145	0.01	255.393	0	-1.45161
																		1850	10	5.153	Block5147	0	368.766	0	0.193123		1850	10	5.153	Block5147	0.01	255.384	0	-1.35431
																		1851	10	5.223	Block5149	0.02	368.635	0	1.26048		1851	10	5.223	Block5149	0	255.448	0	-0.303392
																		1852	10	5.394	Block5150	0.01	368.691	0	-1.19229		1852	10	5.394	Block5150	0.04	255.227	0.1	-2.0586
																		1853	10	5.457	Block5152	0.26	366.565	0.6	-7.44061		1853	10	5.457	Block5152	0.26	253.945	0.6	-6.16104
																		1854	10	5.506	Block5154	0.32	366.028	0.7	-5.89686		1854	10	5.506	Block5154	0.35	253.385	0.8	-5.12718
																		1855	10	5.867	Block5155	0.28	366.363	0.7	-6.12537		1855	10	5.867	Block5155	0.32	253.589	0.7	-5.39744
																		1856	10	6.054	Block5156	0.32	366.028	0.7	-5.89686		1856	10	6.054	Block5156	0.35	253.385	0.8	-5.12718
																		1857	10	6.248	Block5157	0.28	366.363	0.7	-6.12537		1857	10	6.248	Block5157	0.32	253.589	0.7	-5.39744
																		1858	10	6.337	Block5158	0.28	366.348	0.7	-5.38692		1858	10	6.337	Block5158	0.43	252.941	1	-5.49234
																		1859	10	6.492	Block5159	0.21	366.962	0.5	-4.78705		1859	10	6.492	Block5159	0.34	253.426	0.8	-5.07615
																		1860	10	6.571	Block5160	0.28	366.348	0.7	-5.38692		1860	10	6.571	Block5160	0.43	252.941	1	-5.49234
																		1861	10	6.711	Block5162	0.3	366.181	0.7	-5.02395		1861	10	6.711	Block5162	0.41	253.02	1	-4.87597
																		1862	10	6.844	Block5163	0.33	365.995	0.8	-5.31948		1862	10	6.844	Block5163	0.46	252.738	1.1	-5.26644
																		1863	10	7.368	Block5167	0.17	367.345	0.4	3.42385		1863	10	7.368	Block5167	0.03	255.258	0.1	1.27834
																		1864	10	7.434	Block5172	0.2	367.064	0.5	-4.40158		1864	10	7.434	Block5172	0.32	253.544	0.7	-4.66252
																		1865	10	7.459	Block5173	0.28	366.348	0.7	-5.38692		1865	10	7.459	Block5173	0.43	252.941	1	-5.49234
																		1866	10	7.68	Block5175	0.3	366.181	0.7	-5.02395		1866	10	7.68	Block5175	0.41	253.02	1	-4.87597
																		1867	10	7.742	Block5177	0.28	366.348	0.7	-5.38692		1867	10	7.742	Block5177	0.43	252.941	1	-5.49234
																		1868	10	7.824	Block5178	0.33	365.995	0.8	-5.31948		1868	10	7.824	Block5178	0.46	252.738	1.1	-5.26644
																		1869	10	8.824		0.29	366.328	0.7	-5.38257		1869	10	8.824		0.43	252.929	1	-5.47834
																		1870	10	8.871	Block5179	0.28	366.348	0.7	-5.38692		1870	10	8.871	Block5179	0.43	252.941	1	-5.49234
																		1871	10	9.083	Block5180	0.26	366.538	0.6	-5.03596		1871	10	9.083	Block5180	0.38	253.238	0.9	-5.02257
																		1872	10	9.263	Block5181	0.19	367.119	0.4	-4.44676		1872	10	9.263	Block5181	0.3	253.691	0.7	-4.60039
																		1873	10	9.528	Block5182	0.21	366.962	0.5	-4.78705		1873	10	9.528	Block5182	0.34	253.426	0.8	-5.07615
																		1874	10	9.722	Block5183	0.19	367.119	0.4	-4.44676		1874	10	9.722	Block5183	0.3	253.691	0.7	-4.60039
																		1875	10	10.053	Block5184	0	368.768	0	0.0450687		1875	10	10.053	Block5184	0.01	255.404	0	-0.651207
																		1876	10	10.076	Block5185	0.03	368.526	0.1	1.53746		1876	10	10.076	Block5185	0	255.431	0	0.488886
																		1877	10	10.959	Block5186	0.01	368.664	0	1.08492		1877	10	10.959	Block5186	0	255.456	0	0.0238656
																		1878	10	11.26	Block5187	0	368.755	0	-0.416977		1878	10	11.26	Block5187	0.02	255.313	0.1	-1.39342
																		1879	10	11.381	Block5188	0.07	368.208	0.2	2.46041		1879	10	11.381	Block5188	0	255.456	0	0.0309563
																		1880	10	11.409	Block5189	0.17	367.345	0.4	3.42385		1880	10	11.409	Block5189	0.03	255.258	0.1	1.27834
																		1881	10	11.459	Block5191	0.07	368.212	0.2	2.5137		1881	10	11.459	Block5191	0	255.454	0	-0.153303
																		1882	10	11.492	Block5193	0	368.754	0	0.417564		1882	10	11.492	Block5193	0.06	255.107	0.1	-2.10391
																		1883	10	11.639	Block5195	0.17	367.337	0.4	3.49797		1883	10	11.639	Block5195	0.03	255.291	0.1	1.18666
																		1884	10	11.738	Block5197	0.07	368.212	0.2	2.5137		1884	10	11.738	Block5197	0	255.454	0	-0.153303
																		1885	10	11.956	Block5198	0	368.751	0	-0.413973		1885	10	11.956	Block5198	0.06	255.078	0.1	-1.97542
																		1886	10	12.004	Block5201	0.07	368.212	0.2	2.5137		1886	10	12.004	Block5201	0	255.454	0	-0.153303
																		1887	10	12.114	Block5203	0.17	367.345	0.4	3.42385		1887	10	12.114	Block5203	0.03	255.258	0.1	1.27834
																		1888	10	12.184	Block5205	0.07	368.208	0.2	2.46041		1888	10	12.184	Block5205	0	255.456	0	0.0309563
																		1889	10	12.214	Block5208	0	368.754	0	0.359589		1889	10	12.214	Block5208	0.04	255.196	0.1	-1.56913
																		1890	10	12.254	Block5212	0	368.761	0	0.232795		1890	10	12.254	Block5212	0.21	254.197	0.5	-3.05829
																		1891	10	12.297	Block5213	0	368.764	0	0.163361		1891	10	12.297	Block5213	0.21	254.234	0.5	-2.96945
																		1892	10	12.466	Block5217	0	368.765	0	-0.140374		1892	10	12.466	Block5217	0.31	253.653	0.7	-3.46646
																		1893	10	12.647	Block5220	0	368.766	0	-0.111094		1893	10	12.647	Block5220	0.08	254.975	0.2	-1.93442
																		1894	10	12.689	Block5221	0.01	368.68	0	0.783528		1894	10	12.689	Block5221	0.02	255.31	0.1	-1.01045
																		1895	10	12.749	Block5226	0.17	367.345	0.4	3.42385		1895	10	12.749	Block5226	0.03	255.258	0.1	1.27834
																		1896	10	12.837	Block5229	0	368.75	0	-0.223258		1896	10	12.837	Block5229	0.37	253.279	0.9	-2.44343
																		1897	10	13.066	Block5230	0	368.747	0	0.246337		1897	10	13.066	Block5230	0.27	253.873	0.6	-2.12164
																		1898	10	13.096	Block5231	0	368.75	0	-0.223258		1898	10	13.096	Block5231	0.37	253.279	0.9	-2.44343
																		1899	10	13.306	Block5232	0	368.747	0	0.246337		1899	10	13.306	Block5232	0.27	253.873	0.6	-2.12164
																		1900	10	13.349	Block5233	0	368.75	0	-0.223258		1900	10	13.349	Block5233	0.37	253.279	0.9	-2.44343
																		1901	10	13.593	Block5237	0.17	367.337	0.4	3.49797		1901	10	13.593	Block5237	0.03	255.291	0.1	1.18666
																		1902	10	13.75	Block5242	0.02	368.619	0	0.924107		1902	10	13.75	Block5242	0.14	254.607	0.3	-2.20947
																		1903	10	13.961	Block5244	0.19	367.138	0.4	3.24634		1903	10	13.961	Block5244	0	255.456	0	-0.0166667
																		1904	10	14.143	Block5247	0.17	367.346	0.4	3.22588		1904	10	14.143	Block5247	0	255.451	0	0.186987
																		1905	10	14.694	Block5254	0.14	367.593	0.3	3.38622		1905	10	14.694	Block5254	0.01	255.375	0	0.886102
																		1906	10	15.03	Block5255	0.07	368.212	0.2	2.5137		1906	10	15.03	Block5255	0	255.454	0	-0.153303
																		1907	10	15.866	Block5257	0.09	367.996	0.2	2.88995		1907	10	15.866	Block5257	0	255.449	0	0.270191
																		1908	10	15.912	Block5260	0.01	368.641	0	0.957765		1908	10	15.912	Block5260	0.21	254.189	0.5	-3.02386
																		1909	10	15.962	Block5262	0	368.763	0	-0.187586		1909	10	15.962	Block5262	0.33	253.488	0.8	-3.66796
																		1910	10	16.658	Block5263	0	368.765	0	-0.140374		1910	10	16.658	Block5263	0.31	253.653	0.7	-3.46646
																		1911	10	16.941	Block5264	0	368.763	0	-0.187586		1911	10	16.941	Block5264	0.33	253.488	0.8	-3.66796
																		1912	10	17.505	Block5265	0	368.763	0	-0.187586		1912	10	17.505	Block5265	0.33	253.488	0.8	-3.66796
																		1913	10	17.634	Block5270	0.12	367.768	0.3	2.90736		1913	10	17.634	Block5270	0.01	255.368	0	-0.862932
																		1914	10	17.789	Block5273	0.07	368.212	0.2	2.5137		1914	10	17.789	Block5273	0	255.454	0	-0.153303
																		1915	10	18.789		0.07	368.106	0.2	2.56653		1915	10	18.789		0	255.455	0	-0.0743772
																		1916	10	19.789		0.07	368.021	0.2	2.61306		1916	10	19.789		0	255.456	0	0.000837352
																		1917	10	20.789		0.08	367.957	0.2	2.65755		1917	10	20.789		0	255.455	0	0.0719188
																		1918	10	21.789		0.08	367.92	0.2	2.69441		1918	10	21.789		0	255.453	0	0.145022
																		1919	10	22.789		0.08	367.913	0.2	2.72333		1919	10	22.789		0	255.451	0	0.213164
																		1920	10	23.789		0.09	367.934	0.2	2.74795		1920	10	23.789		0	255.447	0	0.278092
																		1921	10	24.761	Block5274	0.09	367.985	0.2	2.76343		1921	10	24.761	Block5274	0	255.444	0	0.336865
																		1922	10	25.067	Block5275	0.07	368.212	0.2	2.5137		1922	10	25.067	Block5275	0	255.454	0	-0.153303
																		1923	10	25.184	Block5276	0.04	368.465	0.1	1.90533		1923	10	25.184	Block5276	0.01	255.411	0	-0.737311
																		1924	10	25.21	Block5277	0	368.754	0	0.417564		1924	10	25.21	Block5277	0.06	255.107	0.1	-2.10391
																		1925	10	25.394	Block5278	0.04	368.465	0.1	1.90533		1925	10	25.394	Block5278	0.01	255.411	0	-0.737311
																		1926	10	25.468	Block5279	0.07	368.212	0.2	2.5137		1926	10	25.468	Block5279	0	255.454	0	-0.153303
																		1927	10	26.468		0.04	368.37	0.1	2.08222		1927	10	26.468		0.01	255.422	0	-0.610588
																		1928	10	27.468		0.02	368.538	0.1	1.58537		1928	10	27.468		0.02	255.345	0	-1.10327
																		1929	10	28.468		0.01	368.676	0	1.02854		1929	10	28.468		0.03	255.233	0.1	-1.60346
																		1930	10	29.468		0	368.753	0	0.438453		1930	10	29.468		0.06	255.111	0.1	-2.08759
																		1931	10	29.503	Block5280	0	368.754	0	0.417564		1931	10	29.503	Block5280	0.06	255.107	0.1	-2.10391
																		1932	10	30.503		0	368.72	0	0.715895		1932	10	30.503		0.05	255.059	0.2	-2.06359
																		1933	10	31.503		0.01	368.658	0	1.02852		1933	10	31.503		0.05	255.048	0.2	-1.98297
																		1934	10	32.503		0.01	368.572	0.1	1.3245		1934	10	32.503		0.04	255.07	0.2	-1.86556
																		1935	10	33.503		0.02	368.486	0.1	1.5657		1935	10	33.503		0.04	255.12	0.1	-1.71325
																		1936	10	34.503		0.03	368.421	0.1	1.73728		1936	10	34.503		0.03	255.186	0.1	-1.53449
																		1937	10	35.503		0.03	368.395	0.1	1.83189		1937	10	35.503		0.03	255.255	0.1	-1.34738
																		1938	10	36.503		0.04	368.408	0.1	1.86241		1938	10	36.503		0.02	255.317	0.1	-1.15622
																		1939	10	37.149	Block5281	0.04	368.435	0.1	1.85305		1939	10	37.149	Block5281	0.02	255.352	0	-1.03644
																		1940	10	37.192	Block5284	0.11	367.842	0.3	3.24523		1940	10	37.192	Block5284	0	255.456	0	-0.0390006
																		1941	10	37.253	Block5289	0	368.766	0	-0.116283		1941	10	37.253	Block5289	0.02	255.347	0	-0.960606
																		1942	10	37.293	Block5293	0	368.754	0	0.417564		1942	10	37.293	Block5293	0.06	255.107	0.1	-2.10391
																		1943	10	38.023	Block5295	0.2	367.039	0.5	-4.685		1943	10	38.023	Block5295	0.32	253.556	0.7	-4.91032
																		1944	10	38.071	Block5296	0.16	367.391	0.4	-4.63562		1944	10	38.071	Block5296	0.29	253.769	0.7	-5.13085
																		1945	10	38.33	Block5297	0.2	367.039	0.5	-4.685		1945	10	38.33	Block5297	0.32	253.556	0.7	-4.91032
																		1946	10	38.503	Block5298	0.16	367.391	0.4	-4.63562		1946	10	38.503	Block5298	0.29	253.769	0.7	-5.13085
																		1947	10	38.564	Block5299	0.13	367.687	0.3	-3.96635		1947	10	38.564	Block5299	0.17	254.463	0.4	-3.80059
																		1948	10	38.601	Block5301	0.16	367.439	0.4	-4.95841		1948	10	38.601	Block5301	0.13	254.665	0.3	-3.82542
																		1949	10	38.64	Block5302	0.1	367.949	0.2	-4.07267		1949	10	38.64	Block5302	0.05	255.154	0.1	-2.47369
																		1950	10	38.86	Block5303	0.04	368.418	0.1	1.99362		1950	10	38.86	Block5303	0.06	255.077	0.1	2.07559
																		1951	10	38.932	Block5304	0	368.763	0	0.217147		1951	10	38.932	Block5304	0	255.429	0	0.499197
																		1952	10	38.96	Block5306	0.04	368.419	0.1	-2.11754		1952	10	38.96	Block5306	0.02	255.33	0	-1.27004
																		1953	10	39.114	Block5308	0.21	366.955	0.5	-5.13608		1953	10	39.114	Block5308	0.16	254.538	0.4	-3.65437
																		1954	10	39.25	Block5309	0.26	366.544	0.6	-5.89015		1954	10	39.25	Block5309	0.27	253.87	0.6	-4.97403
																		1955	10	39.314	Block5312	0.09	367.991	0.2	-2.9728		1955	10	39.314	Block5312	0.1	254.882	0.2	-2.55365
																		1956	10	39.405	Block5313	0.15	367.512	0.3	-3.88025		1956	10	39.405	Block5313	0.15	254.565	0.3	-3.2685
																		1957	10	39.448	Block5314	0.3	366.203	0.7	-5.70551		1957	10	39.448	Block5314	0.31	253.654	0.7	-4.78276
																		1958	10	39.507	Block5315	0.26	366.544	0.6	-5.89015		1958	10	39.507	Block5315	0.27	253.87	0.6	-4.97403
																		1959	10	39.66	Block5317	0.02	368.617	0	-1.11432		1959	10	39.66	Block5317	0.05	255.178	0.1	-1.51246
																		1960	10	39.774	Block5320	0.26	366.544	0.6	-5.89015		1960	10	39.774	Block5320	0.27	253.87	0.6	-4.97403
																		1961	10	40.024	Block5321	0.3	366.203	0.7	-5.70551		1961	10	40.024	Block5321	0.31	253.654	0.7	-4.78276
																		1962	10	40.167	Block5322	0.26	366.544	0.6	-5.89015		1962	10	40.167	Block5322	0.27	253.87	0.6	-4.97403
																		1963	10	40.189	Block5323	0.18	367.197	0.4	-5.14337		1963	10	40.189	Block5323	0.19	254.311	0.4	-4.39031
																		1964	10	40.248	Block5324	0.26	366.544	0.6	-5.89015		1964	10	40.248	Block5324	0.27	253.87	0.6	-4.97403
																		1965	10	40.335	Block5325	0.3	366.203	0.7	-5.70551		1965	10	40.335	Block5325	0.31	253.654	0.7	-4.78276
																		1966	10	40.497	Block5327	0.12	367.761	0.3	-3.70623		1966	10	40.497	Block5327	0.09	254.926	0.2	-2.68857
																		1967	10	40.588	Block5328	0.01	368.719	0	0.615598		1967	10	40.588	Block5328	0.02	255.354	0	-0.886131
																		1968	10	40.772	Block5330	0.05	368.314	0.1	1.69146		1968	10	40.772	Block5330	0	255.447	0	0.233928
																		1969	10	40.917	Block5334	0	368.753	0	-0.351425		1969	10	40.917	Block5334	0.05	255.17	0.1	-1.56291
																		1970	10	41.575	Block5340	0.02	368.609	0	0.983262		1970	10	41.575	Block5340	0	255.454	0	0.0911097
																		1971	10	41.603	Block5346	0.01	368.656	0	0.591438		1971	10	41.603	Block5346	0.08	254.975	0.2	1.22488
																		1972	10	41.687	Block5357	0	368.752	0	-0.360716		1972	10	41.687	Block5357	0.09	254.935	0.2	-2.07145
																		1973	10	41.716	Block5358	0	368.753	0	-0.351425		1973	10	41.716	Block5358	0.05	255.17	0.1	-1.56291
																		1974	10	41.761	Block5359	0	368.764	0	0.173429		1974	10	41.761	Block5359	0.03	255.306	0.1	-1.11082
																		1975	10	41.803	Block5360	0.02	368.596	0	1.16957		1975	10	41.803	Block5360	0	255.448	0	-0.242869
																		1976	10	41.969	Block5362	0.12	367.713	0.3	3.07838		1976	10	41.969	Block5362	0.01	255.398	0	0.721098
																		1977	10	42.182	Block5364	0.01	368.642	0	1.13263		1977	10	42.182	Block5364	0	255.426	0	-0.547887
																		1978	10	42.28	Block5365	0.1	367.942	0.2	3.23673		1978	10	42.28	Block5365	0.01	255.406	0	0.791795
																		1979	10	42.312	Block5366	0.53	364.262	1.2	10.6411		1979	10	42.312	Block5366	0.21	254.227	0.5	5.55673
																		1980	10	42.812	Block5367	0.95	360.74	2.2	9.0516		1980	10	42.812	Block5367	0.41	253.015	1	4.99129
																		1981	10	42.893	Block5368	1.05	359.891	2.4	11.3644		1981	10	42.893	Block5368	0.52	252.386	1.2	6.6831
																		1982	10	43.116	Block5369	0.94	360.825	2.2	12.124		1982	10	43.116	Block5369	0.4	253.123	0.9	6.57093
																		1983	10	43.169	Block5371	0.62	363.479	1.4	10.89		1983	10	43.169	Block5371	0.28	253.832	0.6	6.03522
																		1984	10	43.307	Block5372	0.24	366.723	0.6	6.43746		1984	10	43.307	Block5372	0.05	255.143	0.1	2.51658
																		1985	10	43.602	Block5374	0.57	363.964	1.3	8.71241		1985	10	43.602	Block5374	0.22	254.152	0.5	4.53951
																		1986	10	43.679	Block5378	0.15	367.453	0.4	4.7051		1986	10	43.679	Block5378	0.06	255.096	0.1	2.46301
																		1987	10	43.842	Block5379	0.31	366.14	0.7	5.77526		1987	10	43.842	Block5379	0.04	255.229	0.1	1.6975
																		1988	10	44.664	Block5380	0.06	368.281	0.1	2.23021		1988	10	44.664	Block5380	0.01	255.386	0	-0.845361
																		1989	10	44.857	Block5381	0.2	367.1	0.5	4.60167		1989	10	44.857	Block5381	0	255.455	0	-0.101154
																		1990	10	44.975	Block5383	0.2	367.1	0.5	4.60167		1990	10	44.975	Block5383	0	255.455	0	-0.101154
																		1991	10	45.098	Block5389	0.29	366.333	0.7	3.56838		1991	10	45.098	Block5389	0	255.438	0	-0.306113
																		1992	10	45.132	Block5391	0.22	366.855	0.5	3.13309		1992	10	45.132	Block5391	0.01	255.386	0	-0.598315
																		1993	10	45.205	Block5394	0.37	365.625	0.9	4.73729		1993	10	45.205	Block5394	0.09	254.934	0.2	1.92959
																		1994	10	45.256	Block5398	0.36	365.719	0.8	3.6374		1994	10	45.256	Block5398	0.02	255.317	0.1	0.776156
																		1995	10	45.348	Block5399	0.29	366.32	0.7	3.28652		1995	10	45.348	Block5399	0.01	255.397	0	0.510851
																		1996	10	45.606	Block5400	0.31	366.162	0.7	3.36265		1996	10	45.606	Block5400	0.01	255.42	0	0.392373
[truncated: 2,118 more rows]
[truncated: 116 more columns]

## Sheet: Supplemental Table S3
Supplemental Table S3. Quantitative trait loci (QTL) analysis associated by nonparametric mapping (Kruskal–Wallis analysis, K*) and multiple-QTL model (MQM) mapping with Heterodera glycines infection including female index (FI) and cysts per gram root (CGR) and Meloidogyne incongnita infection including galling index (GI), reproduction (RF), egg massed per gram root (EMR) and eggs per gram root (…
QTL name	Chr b	QTL region	SNP block	K* Test1				MQM Test1
		Mbp c		K*	Signif. d	ZYD e	SN	LOD f	PVE (%)	Additive effect
QTL-FI a
Hg4-Gsa01-FI	01a	2.21-24.53	278-403	9.224	****	93.88	106.75	1.9	4.3	-6.57
Hg4-Gs01b-FI	01b	33.73-50.79	423-506	5.619	**	95.51	106.51	1.64	3.7	-6.27
Hg4-Gs04a-FI	04a	46.92-48.67	2420-2448	4.245	**	97.18	106.82	1.25	2.9	-4.74
Hg4-Gs05-FI	5	29.30-39.42	2726-2892	7.724	***	93.48	106.58	2.29	5.2	-7.85
Hg4-Gm06-FI	6	49.44-51.13	3365-3412	6.593	**	114.15	103.83	1.58	3.6	5.16
Hg4-Gm07a-FI	07a	0.00-7.60	3413-3531	6.691	***	123.85	104.27	2.2	5	9.5
Hg4-Gs07b-FI	07b	10.49-17.00	3754-3870	9.653	****	92.87	106.18	1.25	2.9	-6.34
Hg4-Gs07c-FI	07c	36.08-41.66	3984-4118	4.409	**	93.46	106.36	1.56	3.6	-7.96
Hg4-Gs08a-FI	08a	9.96-14.77	4234-4471	12.37	******	83.31	105.9	2.14	4.8	-20.14
Hg4-Gs08b-FI	08b	19.15-22.01	4644-4665	3.949	**	97.08	106.54
Hg4-Gm08c-FI	08c	44.68-46.87	4778-4818	7.48	***	126.6	104.84	1.24	2.8	10.89
Hg4-Gs09a-FI	09a	0.65-5.47	4833-4865	11.833	*****	85.78	106.37	2.44	5.5	-10.29
Hg4-Gs09b-FI	09b	28.38-37.00	4866-4976	4.815	**	98.05	106.39
Hg4-Gm09c-FI	09c	43.71-48.02	5016-5087	5.3	**	112.54	104.04	1.02	2.3	4.48
Hg4-Gm10-FI	10	42.31-43.60	5366-5374	4.814	**	127.73	104.88	1.05	2.4	11.36
Hg4-Gs11a-FI	11a	2.15-2.66	5496-5513	5.744	**	98.88	107.26	1.48	3.4	-4.36
Hg4-Gs11b-FI	11b	24.41-26.20	5859-5866	4.164	**	81.73	105.69	1.01	2.3	-11.98
Hg4-Gm11c-FI	11c	33.96-34.61	5990-6042	4.531	**	128.4	105.2
Hg4-Gm12a-FI	12a	2.69-2.95	6117-6123	4.639	**	114.61	104.46
Hg4-Gs12b-FI	12b	13.10-39.99	6259-6402	10.793	****	90.04	106.4	1.96	4.4	-8.18
Hg4-Gs13a-FI	13a	14.27-26.55	6666-6802	4.866	**	95.03	106.39	1.34	3.1	-5.54
Hg4-Gm13b-FI	13b	27.20-28.69	6814-6876	7.991	****	126.66	104.92
Hg4-Gs14-FI	14	3.13-4.50	7248-7271	6.515	**	97.42	106.84	1.38	3.1	-4.51
Hg4-Gs16-FI	16	5.80-36.89	8407-8677	6.344	**	94.86	106.46	1.79	4	-9.64
Hg4-Gs20-FI	20	0.48-2.51	10409-10447	5.731	**	87.26	106.34	2.14	4.8	-11.11
QTL-CGR
Hg4-Gs01a-CGR	01a	0.89-0.95	84-95	8.298	****	56.72	65.54	1.74	3.9	-4.3
Hg4-Gs01b-CGR	01b	33.74-49.34	423-482	11.151	*****	53.05	65.5	2.51	5.7	-6.66
Hg4-Gm02-CGR	2	0.60-9.792	563-883	25.949	*******	83.13	62.26	6.66	14.3	11.37
Hg4-Gm03a-CGR	03a	0.75-1.56	1468-1472	5.312	**	70.32	63.29
Hg4-Gs03b-CGR	03b	36.91-45.51	1878-2080	11.847	*****	77.15	62.68	3.02	6.7	7.01
Hg4-Gs04c-CGR	04c	47.05-47.43	2425-2436	5.028	**	58.72	65.56	1.3	3	-3.46
Hg4-Gs05-CGR	5	31.72-33.28	2740-2793	4.157	**	57.03	64.81
Hg4-Gm06a-CGR	06a	11.27-12.63	3130-3162	7.163	***	80.66	63.51	1.76	4	8.54
Hg4-Gs06b-CGR	06b	38.98-47.37	3320-3354	8.199	****	55.94	65.33	1.65	3.8	-4.74
Hg4-Gm07a-CGR	07a	0.01-7.60	3413-3531	7.271	***	74.13	63.77	1.67	3.8	6.92
Hg4-Gs07b-CGR	07b	36.08-39.71	3984-4102	5.939	**	56.4	65.18	1.58	3.6	-4.71
Hg4-Gm09-CGR	9	44.44-48.43	5025-5098	5.077	**	69.11	63.53
Hg4-Gs10-CGR	10	3.16-3.98	5132-5236	3.877	**	49.15	64.46
Hg4-Gm11a-CGR	11a	0.02-10.12	5465-5804	14.522	******	75.34	62.42	2.99	6.7	6.3
Hg4-Gs11b-CGR	11b	30.50-32.28	5897-5905	3.977	**	57.6	65.01
Hg4-Gm12-CGR	12	3.91-12.82	6141-6256	13.226	******	76.7	62.89	2.73	6.1	7.03
Hg4-Gm13-CGR	13	0.01-15.84	6403-6682	7.782	***	67.69	61.66	1.93	4.4	4.83
Hg4-Gs14a-CGR	14a	3.13-6.47	7248-7324	8.113	****	56.96	65.55	1.69	3.8	-4.14
Hg4-Gs14b-CGR	14b	15.04-45.46	7428-7556	5.572	**	55	64.95	1.22	2.8	-4.84
Hg4-Gs15a-CGR	15a	4.12-7.73	7684-7723	5.407	**	53.59	64.93	1.35	3.1	-5.96
Hg4-Gs16-CGR	16	5.37-36.40	8405-8666	6.916	***	56.89	65.57	1.76	4	-4.34
Hg4-Gm17a-CGR	17a	3.44-10.09	8732-8812	6.884	***	71.85	62.68	1.97	4.5	5.02
Hg4-Gs18a-CGR	18a	0.71-8.51	9169-9327	6.944	***	53.17	64.98	1.57	3.6	-5.9
Hg4-Gs18d-CGR	18d	56.64-57.61	9534-9562	4.073	**	52.75	64.84	1.21	2.8	-5.57
Hg4-Gs19-CGR	19	44.39-48.37	10127-10312	9.691	****	55.28	65.61	1.79	4.1	-4.28
QTL name	Chr b	QTL region	SNP block	K* Test1 (5000 eggs)				K* Test2 (10000 eggs)				MQM Test1 (5000 eggs)			MQM Test2 (10000 eggs)
		Mbp c		K*	Signif. d	ZYD e	SN	K*	Signif.	ZYD	SN	LOD f	PVE (%)	Additive effect	LOD	PVE (%)	Additive effect
QTL-GI a
Mi1-Gm01a-GI	01a	2.21-7.36	278-393	10.267	****	3.31	3.1					2.16	5.5	0.11
Mi1-Gs01b-GI	01b	46.82-51.75	468-522	6.543	**	2.78	3.15					1.56	4	-0.19
Mi1-Gs02a-GI	02a	4.68-10.07	674-888	6.174	**	2.95	3.16					1.39	4.5	-0.12
Mi1-Gs02b-GI	02b	39.48-45.00	1011-1147	6.495	**	2.95	3.16	5.249	**	3.22	3.59	1.16	3.2	-0.1
Mi1-Gs03a-GI	03a	0.42-19.29	1455-1743	5.157	**	3.02	3.16	5.19	**	3.8	5.54
Mi1-Gs03b-GI	03b	32.94-37.86	1797-1918	9.136	****	2.95	3.16	4.309	**	3.82	3.52	1.76	4.5	-0.1
Mi1-Gs04a-GI	04a	2.50-7.09	2111-2177	6.523	**	3.19	3.58					1.53	3.9	-0.2
Mi1-Gm04b-GI	04b	40.24-45.44	2352-2373	4.518	**	3.24	3.12
Mi1-Gm04c-GI	04c	45.70-50.26	2378-2467					6.425	**	3.21	3.58				1.26	3.3	-0.19
Mi1-Gm05a-GI	05a	3.66-4.49	2523-2530	5.343	**	4.11	3.54
Mi1-Gs05b-GI	05b	32.04-36.27	2766-2870	4.151	**	2.96	3.16	3.858	**	3.33	3.58	1.39	3.6	-0.09	1	2.6	-0.13
Mi1-Gs06a-GI	06a	2.97-16.19	2992-3242					4.271	**	3.26	3.57
Mi1-Gs06b-GI	06b	50.27-51.13	3386-3412	4.813	**	3.03	3.16
Mi1-Gs07a-GI	07a	3.90-24.25	3455-3925	9.756	****	2.89	3.17					2.25	5.7	-0.12
Mi1-Gm07b-GI	07b	0.01-17.80	3413-3899					4.574	**	3.95	3.54
Mi1-Gs08-GI	8	40.75-46.40	4707-4807	7.999	****	2.9	3.16					1.72	4.4	-0.13
Mi1-Gm09a-GI	09a	1.05-5.23	4837-4862					5.978	**	3.96	3.53				1.14	3	0.18
Mi1-Gm09b-GI	09b	32.69-36.83	4868-4974					4.131	**	3.76	3.53
Mi1-Gs09c-GI	09c	46.26-47.56	5042-5072	4.218	**	3.04	3.17
Mi1-Gs10a-GI	10a	2.50-14.69	5124-5254					4.825	**	2.93	3.56				1.06	2.8	-0.23
Mi1-Gm10b-GI	10b	42.31-44.98	5366-5383					4.788	**	4.06	3.54
Mi1-Gm11a-GI	11a	3.61-30.65	5525-5898	8.431	****	3.48	3.1225					1.47	3.8	0.18
Mi1-Gs11b-GI	11b	32.31-34.61	5907-6042	6.366	**	2.9	3.15					1.13	2.9	-0.11
Mi1-Gs12a-GI	12a	0.29-3.12	6057-6134	6.689	***	2.98	3.17					1.47	4.4	-0.1
Mi1-Gm12b-GI	12b	7.98-11.50	6204-6245					4.713	**	3.81	3.52				1.02	2.6	0.14
Mi1-Gm12c-GI	12c	35.60-39.40	6296-6377					3.971	**	3.82	3.53
Mi1-Gm13a-GI	13a	17.01-26.71	6687-6807	7.369	***	3.28	3.11					1.22	3.2	0.09
Mi1-Gs13b-GI	13b	28.37-42.52	6863-7097	10.217	****	2.86	3.16	4.043	**	3.21	3.57	2.62	6.7	-0.15
Mi1-Gm13c-GI	13c	40.21-43.92	7087-7107	4.989	**	3.53	3.12	5.65	**	4.06	3.54				1.28	3.3	0.26
Mi1-Gs13d-GI	13d	44.15-44.22	7115-7117					7.103	***	3.2	3.58				1.52	3.9	-0.19
Mi1-Gs14a-GI	14a	0.31-4.50	7157-7572					4.389	**	3.15	3.57
Mi1-Gm14b-GI	14b	42.73-45.88	7540-7577	4.701	**	2.99	3.15
Mi1-Gs15a-GI	15a	0.00-4.50	7634-7688	7.719	***	2.88	3.15	4.688	**	3.22	3.58	1.62	4.4	-0.13	1.07	2.8	-0.17
Mi1-Gs15b-GI	15b	23.90-50.11	7931-8261	5.797	**	2.94	3.15					1.72	4.4	-0.11
Mi1-Gm16-GI	16	4.75-33.13	8399-8590	7.279	***	3.36	3.12					1.53	4.1	0.12
Mi1-Gs17-GI	17	13.12-39.60	8857-9095	8.816	****	2.85	3.16	4.995	**	3.28	3.58	2.22	5.7	-0.15	1	2.6	-0.15
Mi1-Gs18a-GI	18a	4.89-12.78	9238-9377	4707	**	2.99	3.15
Mi1-Gs18b-GI	18b	48.54-57.75	9401-9567	4.661	**	2.95	3.15	11.291	*****	3.15	3.59				2.17	5.6	-0.22
Mi1-Gm19a-GI	19a	1.16-10.12	9596-9688	9.137	****	3.65	3.14
Mi1-Gm19b-GI	19b	30.04-46.61	9696-10228	8.696	****	3.4	3.13	13.577	******	4.02	3.52	1.4	4	0.14	2.12	5.4	0.29
Mi1-Gm20a-GI	20a	34.47-40.15	10607-11084	4.174	**	3.26	3.12
Mi1-Gs20b-GI	20b	46.37-47.03	11159-11174					4.048	**	3.26	3.58				1.08	3.6	-0.18
QTL-RF
Mi1-Gm01-RF	1	0.01-45.44	1-463					5.459	**	0.71	0.63
Mi1-Gs02a-RF	02a	0.21-0.43	545-562					4.012	**	0.44	0.65
Mi1-Gm02b-RF	02b	3.81-4.07	628-646					5.552	**	0.69	0.54
Mi1-Gm02c-RF	02c	45.37-47.86	1183-1421					4.58	**	0.76	0.62
Mi1-Gs04a-RF	04a	7.94-18.56	2193-2350					8.796	****	0.45	0.66
Mi1-Gs04b-RF	04b	40.24-48.67	2352-2448					10.605	****	0.44	0.66
Mi1-Gm05a-RF	05a	2.18-3.40	2506-2518	3.843	**	0.24	0.15					1.26	3.3	0.05
Mi1-Gm05b-RF	05b	3.66-39.36	2523-2891					27.759	****	0.82	0.56				2.3	5.9	0.13
Mi1-Gm06a-RF	06a	0.00-2.83	2966-2991					7.599	***	0.83	0.62
Mi1-Gs06b-RF	06b	5.58-9.23	3028-3115					10.077	****	0.43	0.66
Mi1-Gm06c-RF	06c	49.54-51.13	3366-3412					4.65	**	0.71	0.63				2.21	5.9	0.22
Mi1-Gs07a-RF	07a	0.96-4.45	3432-3460					4.175	**	0.4	0.64				2	5.1	0.31
Mi1-Gs07b-RF	07b	8.93-10.34	3689-3747	6.38	**	0.1	0.16					1.18	3.1	-0.03
Mi1-Gm07c-RF	07c	9.62-17.90	3696-3904					9.522	****	1.09	0.62				2.26	5.8	0.24
Mi1-Gs07c-RF	07d	35.20-42.95	3942-4133					7.363	***	0.4	0.65
Mi1-Gs08-RF	8	17.16-17.86	4540-4622					9.361	****	0.53	0.74				1.5	3.9	-0.1
Mi1-Gm09-RF	9	3.92-5.23	4861-4862					5.944	**	0.8	0.62
Mi1-Gm10-RF	10	5.22-5.46	5149-5152	6.318	**	0.35	0.15					2.21	5.6	0.1
Mi1-Gm13-RF	13	10.67-37.38	6652-7085	8.74	****	0.29	0.15					1.92	5	0.06
Mi1-Gs14a-RF	14a	4.96-15.56	7277-7431					5.311	**	0.39	0.64
Mi1-Gm14b-RF	14b	44.62-46.59	7548-7592					8.641	****	0.88	0.62
Mi1-Gs15-RF	15	11.88-50.40	7755-8272					11.454	*****	0.45	0.66
Mi1-Gm16a-RF	16a	3.04-33.13	8380-8590	6.837	***	0.25	0.14					4.31	10.7	0.07
Mi1-Gs16b-RF	16b	3.04-33.92	8380-8596					12.308	******	0.34	0.65
Mi1-Gm17a-RF	17a	0.01-15.89	8697-8897					6.993	***	0.94	0.62
Mi1-Gm17b-RF	17b	38.03-40.18	9019-9121					7.241	***	0.88	0.63
Mi1-Gm18a-RF	18a	4.34-18.05	9230-9387					4.772	**	0.85	0.62
Mi1-Gm18b-RF	18b	40.63-53.09	9393-9484					5.244	**	0.82	0.62
Mi1-Gm19a-RF	19a	1.35-7.39	9614-9646					4.084	**	0.9	0.62
Mi1-Gm19b-RF	19b	30.84-44.50	9706-10135					5.763	**	0.84	0.62
Mi1-Gs20a-RF	20a	1.19-7.99	10423-10459					2.985	***	0.41	0.64
Mi1-Gm20b-RF	20b	36.42-47.03	10843-11174					4.911	**	0.19	0.15
QTL-EMR
Mi1-Gm01a-EMR	01a	0.01-4.52	1-347	4.447	**	3.05	2.38	5.414	**	21.86	18.64
Mi1-Gs01b-EMR	01b	27.21-43.15	405-438					6.23	**	12.78	19.47
Mi1-Gs01c-EMR	01c	48.06-51.75	471-522	3.876	**	1.08	2.53
Mi1-Gs02-EMR	2	0.01-14.42	542-949	7.579	***	1.62	2.65	6.504	**	13.05	19.62	1.48	3.8	-0.51	1.21	3.1	-3.74
Mi1-Gm03-EMR	3	1.90-36.45	1481-1872					9.433	****	23.94	18.31				1.13	4.1	3.2
Mi1-Gm04a-EMR	04a	5.92-10.49	2159-2228	6.809	***	1.54	2.6	7.619	***	12.45	19.62	1.25	3.2	-0.54	1.09	2.8	-3.55
Mi1-Gs04b-EMR	04b	12.14-44.41	2259-2361	3.927	**	15.93	19.18
Mi1-Gm04c-EMR	04c	51.17-51.60	2475-2486	4.743	**	21.37	18.35
Mi1-Gm05a-EMR	05a	4.49-29.79	2530-2733					10.035	****	22.75	17.41				1.94	5	2.62
Mi1-Gs05b-EMR	05b	32.37-37.03	2782-2879	8.549	****	1.58	2.63	5.398	**	13.93	19.63	1.55	4	-0.53
Mi1-Gs06a-EMR	06a	5.58-25.15	3028-3298					6.23	**	12.78	19.47				1.07	2.8	-2.95
Mi1-Gm06b-EMR	06b	49.70-51.13	3369-3412					6.139	**	23.49	18.61				2.05	5.3	4.45
Mi1-Gs07a-EMR	07a	7.73-10.34	3554-3747	10.204	****	1.43	2.66					1.62	4.2	-0.56
Mi1-Gm07b-EMR	07b	10.81-17.83	3758-3900					4.808	**	28.41	18.82				1.26	5.9	6.17
Mi1-Gm08a-EMR	08a	12.37-17.86	4454-4622	6.388	**	2.9	2.07	3.952	**	16.85	21.14	1.72	4.4	0.4	1.59	4.1	-2.16
Mi1-Gs08b-EMR	08b	40.75-46.40	4707-4807	8.591	****	1.21	2.59					1.28	3.3	-0.68
Mi1-Gs09a-EMR	09a	1.55-5.47	4843-4865	6.145	**	4.23	2.4					1.56	4	0.91
Mi1-Gm09b-EMR	09b	28.38-37.00	4866-4976	3.942	**	3.41	2.4
Mi1-Gs09c-EMR	09c	41.99-48.84	4998-5104	4.209	**	1.94	2.64	4.923	**	21.85	18.56
Mi1-Gm10a-EMR	10a	39.31-40.50	5312-5327	4.212	**	4.22	2.44
Mi1-Gm10b-EMR	10b	41.58-50.31	5340-5464					5.886	**	31.17	18.76				1.32	3.4	9.29
Mi1-Gm11a-EMR	11a	3.73-24.41	5529-5859	4.186	**	4.02	2.43
Mi1-Gs11b-EMR	11b	31.87-34.45	5904-6029	7.211	***	1.33	2.58
Mi1-Gm11c-EMR	11c	26.20-33.51	5866-5972	5.236	**	39.62	18.81					1.67	4.3	10.41
Mi1-Gm12-EMR	12	0.96-39.25	6068-6366	5.779	**	3.6	2.38	5.827	**	22.38	18.32	1.24	3.2	0.61
Mi1-Gm13a-EMR	13a	10.15-31.62	6644-7034	7.507	***	4.14	2.49
Mi1-Gs13b-EMR	13b	22.45-23.15	6758-6766					4.336	**	14.84	19.58
Mi1-Gs13c-EMR	13c	34.46-42.52	7059-7097	4.651	**	1.48	2.57					1.47	3.8	0.59
Mi1-Gs14a-EMR	14a	2.12-7.66	7226-7363	4.988
Mi1-Gm14b-EMR	14b	44.62-46.86	7548-7596					5.937	**	25.55	18.78
Mi1-Gs15-EMR	15	0.86-50.74	7637-8284	4.358	**	0.38	2.5	9.031	****	13.69	19.79				1.18	3.1	-3
Mi1-Gm16-EMR	16	3.04-37.10	8380-8683	10.88	*****	3.89	2.3					4.85	12.1	1.26
Mi1-Gm17a-EMR	17a	7.30-10.09	8781-8812	10.725	****	3.49	2.33					1.71	4.4	0.58
Mi1-Gs17b-EMR	17b	13.26-23.63	8862-8961	4.794	**	1.54	2.56
Mi1-Gs18-EMR	18	2.79-12.78	9201-9377	4.452	**	1.8	2.6
Mi1-Gm19a-EMR	19a	6.00-10.12	9639-9688					4.734	**	33.13	18.56				2.75	11	10.44
Mi1-Gm19b-EMR	19b	30.04-50.44	9696-10393					8.227	****	27.63	18.64				1.91	8.9	10.04
Mi1-Gs19c-EMR	19c	42.46-42.54	10088-10093	4.855	**	1.71	2.58
Mi1-Gs20a-EMR	20a	0.00-32.84	10394-10560					7.594	***	12.83	19.46
Mi1-Gm20b-EMR	20b	34.68-38.13	10634-11051	5.898	**	3.19	2.38
QTL-EGR
Mi1-Gm01a-EGR	01a	0.01-3.90	1-338					4.905	**	4508.44	3853.79
Mi1-Gs01b-EGR	01b	27.21-43.15	405-438					4.127	**	3142.61	4074.05
Mi1-Gs02a-EGR	02a	0.01-2.82	542-592					9.678	****	2526.39	4048.1				1.39	3.6	-752.93
Mi1-Gs02b-EGR	02b	3.81-4.07	628-646					4.633	**	4136.67	3677.03
Mi1-Gs02c-EGR	02c	7.38-14.42	786-949	4.111	**	224.6	340.6
Mi1-Gm03a-EGR	03a	1.90-35.90	1481-1857					17.246	***	4886.12	3910.79
Mi1-Gs03b-EGR	03b	37.38-41.80	1893-1962	5.597	**	205.19	339.06
Mi1-Gs03c-EGR	03c	41.92-43.57	1964-2006					5.374	**	3545.71	4087.76
Mi1-Gs04a-EGR	04a	7.94-11.19	2193-2238					8.474	****	2728.8	4084.45
Mi1-Gm04b-EGR	04b	11.31-12.05	2250-2253					4.31	**	4403.63	3922.94
Mi1-Gs04c-EGR	04c	12.14-48.18	2259-2443					9.594	****	2935.65	4086.17
Mi1-Gs05a-EGR	05a	32.37-42.19	2782-2965	4.932	**	244.39	344.44
Mi1-Gm05b-EGR	05b	3.66-39.36	2523-2891					14.273	******	4810.44	3640.31				2.35	6	542.74
Mi1-Gm06a-EGR	06a	0.00-2.83	2966-2991					9.12	****	5787.72	3896.85				1.2	3.1	853.59
Mi1-Gs06b-EGR	06b	5.58-9.23	3028-3115					11.593	*****	2794.11	410.98				1.14	3	-607.1
Mi1-Gm06c-EGR	06c	48.51-51.13	3358-3412					6.877	***	4650.39	3910.27				1.48	3.8	712.7
Mi1-Gs07a-EGR	07a	0.96-4.45	3432-3460					4.983	**	2724.35	4001.94
Mi1-Gs07b-EGR	07b	7.73-10.34	3554-3747	0.059	****	199.25	353.87					1.5	3.9	-70.78
Mi1-Gm07c-EGR	07c	10.81-36.04	3758-3983					5.557	**	5083.61	3913.28
Mi1-Gs07d-EGRd	07d	37.06-42.95	4040-4133					5.461	**	2813.61	3989.34
Mi1-Gm08a-EGR	08a	9.50-17.54	4228-4586	4.822	**	381.2	281.3					1.46	3.8	48.05
Mi1-Gs08b-EGR	08b	17.16-17.86	4540-4622					4.522	**	3616.66	4375.12
Mi1-Gs08c-EGR	08c	43.53-43.84	4750-4759	5.08	**	201.43	343.95
Mi1-Gm08d-EGRd	08d	22.01-44.42	4665-4777					4.67	**	4926.94	3942.11				1.99	6.3	1386.92
Mi1-Gm09a-EGR	09a	1.76-5.23	4847-4862					4.683	**	4781.16	3919.55
Mi1-Gm09b-EGR	09b	32.69-47.56	4868-5072					6.408	**	4500.18	3879.04
Mi1-Gm10-EGR	10	43.84-47.22	5379-5437					5.766	**	4710.3	3879.53
Mi1-Gm11a-EGR	11a	24.38-30.65	5858-5898					4.553	**	7451.95	3933.5
Mi1-Gs11b-EGR	11b	32.42-33.42	5930-5971	4.621	**	189.6	343.22
Mi1-Gm13a-EGR	13a	10.67-37.31	6652-7083	6.745	***	560.57	330.78
Mi1-Gs13b-EGR	13b	41.98-42.09	7093-7094					4.414	**	3581.49	4007.82
Mi1-Gs14a-EGR	14a	4.75-15.56	7276-7431	4.182	**	240	337.43	5.338	**	2205.17	4004.56
Mi1-Gm14b-EGR	14b	44.62-46.86	7548-7596					10.571	****	5898.22	3893.53				1.14	3	880.73
Mi1-Gs15-EGR	15	13.2-50.11	7766-8261					12.216	******	2609.77	4063.32				1.52	4	-629.57
Mi1-Gs16a-EGR	16a	2.99-4.49	8373-8398					5.426	**	3560.19	4066.94
Mi1-Gm16b-EGR	16b	3.04-33.13	8380-8590	9.006	****	589.61	307.03					5.75	14.1	177.03
Mi1-Gs16c-EGR	16c	25.19-33.92	8477-8596					8.12	****	2649.57	4058.12				1.06	2.8	-524.95
Mi1-Gm17a-EGR	17a	0.01-13.12	8697-8857	5.107	**	410.81	319.86	9.373	****	5727	3855.5				1.67	6.5	1069.98
Mi1-Gm17b-EGR	17b	38.03-40.18	9019-9121					4.705	**	4584.51	3912.25
Mi1-Gs18-EGR	18	5.28-39.02	9249-9392	4.089	**	227.47	344.71
Mi1-Gm19-EGR	19	3.63-44.50	9635-10135					7.643	***	5469.18	3902.07				2.37	10.7	2144.58
Mi1-Gs20a-EGR	20a	0.58-8.00	10414-10459					6.829	***	2832.59	4038.63
Mi1-Gs20b-EGR	20b	46.74-47.03	11170-11174	4.141	**	227.98	343.97
a QTL-FI or GI: QTLs related to female index (FI) or gall index (GI) phenotype. Hg4-Gs01-FI or Mi1-Gs01-GI: The name of QTL for FI or GI on Chr01 from Glycine soja (Gs) ZYD00006 to Heterodera glycines race 4 (HG Type 1.2.3.5.6.7) or Meloidogyne incongnita race 1. Similarly, Hg4-Gm01-FI or Mi1-Gm01-GI represents the name of QTL for FI or GI on Chr01 from G. max cv. Suinong14 to H. glycines race 4 …
